# Supplementary material
Source: publisher figshare collection journal article supplement (https://rs.figshare.com/ndownloader/files/31950386)
Supplement: Supplementary file 1 [file 31950386]

# PRSB article doi:10.1098/rspb.2021.2452, 
# Proceedings of the Royal Society B Biological Sciences
# Elephant seal foraging success is enhanced in Antarctic coastal polynyas
# Arce F, Hindell MA, McMahon CR, Wotherspoon S, Guinet C, Harcourt R, Bestley S
#
# Southern elephant seal dataset (N=26,787 observations) 
# Columns:
# ID = reference ID for each individual seal (n=119)
# date = POSIXct date stamp YYYY-mm-dd  HH:MM:SS GMT for each 6-hourly period
# forage_day = day of trip since forage commencement
# lon = longitude (E) of each 6-hourly location estimate
# lat = latitude (S) of each 6-hourly location estimate
# inside_polynya = lication within polynya area (1) or not (0) defined per Arrigo et al (2003)
# pred_DriftRate = predicted average drift rate (Dr_i) for each 6-hourly location estimate from custom GAM (slimmingDive)
# delta_DriftRate = the difference between the predicted drift rate values (deltaDr_i)
# deploy_locn = factor variable identifying animals' tagging location: 'Kerguelen' or 'Antarctica'
# move_behav = indicator of movement behaviour ranging between 1: in-transit and 2: area-restricted search 
# sex = factor variable 'male' or 'female' 
#
"","ID","date","forage_day","lon","lat","inside_polynya","pred_DriftRate","delta_DriftRate","deploy_locn","move_behav","sex"
"ct105-14f-13.ct105-14f-13.2","ct105-14f-13",2014-02-12 15:58:38,0.25,70.8073981737574,-50.6519234207933,0,-30.8141042955968,0.0125010966171624,"Kerguelen",1,"F"
"ct105-14f-13.ct105-14f-13.3","ct105-14f-13",2014-02-12 21:58:38,0.5,70.6681032288696,-50.8708552549327,0,-30.8016031682816,0.0125011273151343,"Kerguelen",1.01275,"F"
"ct105-14f-13.ct105-14f-13.4","ct105-14f-13",2014-02-13 03:58:38,0.75,70.5706109571486,-50.9548335532115,0,-30.7891019424368,0.0125012258448132,"Kerguelen",1.0055,"F"
"ct105-14f-13.ct105-14f-13.5","ct105-14f-13",2014-02-13 09:58:38,1,70.4649813552884,-51.0472881702837,0,-30.7766005502271,0.0125013922097628,"Kerguelen",1.00225,"F"
"ct105-14f-13.ct105-14f-13.6","ct105-14f-13",2014-02-13 15:58:38,1.25,70.4821445913215,-51.1968667399956,0,-30.7640989238143,0.0125016264127698,"Kerguelen",1.00025,"F"
"ct105-14f-13.ct105-14f-13.7","ct105-14f-13",2014-02-13 21:58:38,1.5,70.5880263858984,-51.3530800997488,0,-30.7515969953568,0.0125019284574923,"Kerguelen",1.0025,"F"
"ct105-14f-13.ct105-14f-13.8","ct105-14f-13",2014-02-14 03:58:38,1.75,70.5633555519914,-51.4514180071723,0,-30.7390946575727,0.0125023377840983,"Kerguelen",1.002,"F"
"ct105-14f-13.ct105-14f-13.9","ct105-14f-13",2014-02-14 09:58:38,2,70.4080618638825,-51.5311035459254,0,-30.7265916146156,0.0125030429570683,"Kerguelen",1.00025,"F"
"ct105-14f-13.ct105-14f-13.10","ct105-14f-13",2014-02-14 15:58:38,2.25,70.2175181182092,-51.7172209787472,0,-30.7140875136355,0.0125041009801041,"Kerguelen",1,"F"
"ct105-14f-13.ct105-14f-13.11","ct105-14f-13",2014-02-14 21:58:38,2.5,70.1147403526646,-51.8815648422588,0,-30.7015817488871,0.0125057647484716,"Kerguelen",1.00025,"F"
"ct105-14f-13.ct105-14f-13.12","ct105-14f-13",2014-02-15 03:58:38,2.75,70.0421396299232,-52.0356893277251,0,-30.6890730879897,0.0125086608973757,"Kerguelen",1,"F"
"ct105-14f-13.ct105-14f-13.13","ct105-14f-13",2014-02-15 09:58:38,3,69.908121696733,-52.2134255481227,0,-30.6765602031325,0.0125128848572242,"Kerguelen",1,"F"
"ct105-14f-13.ct105-14f-13.14","ct105-14f-13",2014-02-15 15:58:38,3.25,69.7292999724704,-52.3693140678243,0,-30.664041766454,0.0125184366785047,"Kerguelen",1,"F"
"ct105-14f-13.ct105-14f-13.15","ct105-14f-13",2014-02-15 21:58:38,3.5,69.617878035769,-52.5781690017874,0,-30.6515164500381,0.0125253164158512,"Kerguelen",1,"F"
"ct105-14f-13.ct105-14f-13.16","ct105-14f-13",2014-02-16 03:58:38,3.75,69.5314521381956,-52.7624451746673,0,-30.638982925909,0.0125335241290825,"Kerguelen",1,"F"
"ct105-14f-13.ct105-14f-13.17","ct105-14f-13",2014-02-16 09:58:38,4,69.3647586948831,-52.9873303174365,0,-30.6264398660271,0.0125430598819365,"Kerguelen",1.00025,"F"
"ct105-14f-13.ct105-14f-13.18","ct105-14f-13",2014-02-16 15:58:38,4.25,69.247009320037,-53.1384061455499,0,-30.6138859422829,0.0125539237441741,"Kerguelen",1,"F"
"ct105-14f-13.ct105-14f-13.19","ct105-14f-13",2014-02-16 21:58:38,4.5,68.978089342497,-53.3256455125991,0,-30.6013198264939,0.0125661157889922,"Kerguelen",1.003,"F"
"ct105-14f-13.ct105-14f-13.20","ct105-14f-13",2014-02-17 03:58:38,4.75,68.9330681966379,-53.4517187172446,0,-30.5887401903991,0.0125796360948283,"Kerguelen",1.0005,"F"
"ct105-14f-13.ct105-14f-13.21","ct105-14f-13",2014-02-17 09:58:38,5,68.7777365794356,-53.6246064538818,0,-30.5761457056537,0.0125944847454262,"Kerguelen",1,"F"
"ct105-14f-13.ct105-14f-13.22","ct105-14f-13",2014-02-17 15:58:38,5.25,68.5623102881043,-53.8459477871509,0,-30.5635350438251,0.0126106618286048,"Kerguelen",1.0015,"F"
"ct105-14f-13.ct105-14f-13.23","ct105-14f-13",2014-02-17 21:58:38,5.5,68.5039276192708,-53.9829701412523,0,-30.5509068763869,0.0126281674381112,"Kerguelen",1.0005,"F"
"ct105-14f-13.ct105-14f-13.24","ct105-14f-13",2014-02-18 03:58:38,5.75,68.3609328290385,-54.0982670991047,0,-30.5382598747153,0.0126470016716063,"Kerguelen",1,"F"
"ct105-14f-13.ct105-14f-13.25","ct105-14f-13",2014-02-18 09:58:38,6,68.0621249834704,-54.2855406712054,0,-30.5255927100826,0.0126671646327792,"Kerguelen",1,"F"
"ct105-14f-13.ct105-14f-13.26","ct105-14f-13",2014-02-18 15:58:38,6.25,67.8337928576439,-54.4467897243706,0,-30.512903883389,0.0126888266935743,"Kerguelen",1,"F"
"ct105-14f-13.ct105-14f-13.27","ct105-14f-13",2014-02-18 21:58:38,6.5,67.5490098021654,-54.6594203981869,0,-30.5001909314979,0.0127129518910585,"Kerguelen",1,"F"
"ct105-14f-13.ct105-14f-13.28","ct105-14f-13",2014-02-19 03:58:38,6.75,67.4147918186982,-54.8419011378125,0,-30.4874510522671,0.0127398792308664,"Kerguelen",1,"F"
"ct105-14f-13.ct105-14f-13.29","ct105-14f-13",2014-02-19 09:58:38,7,67.173987953168,-55.0349463338506,0,-30.4746814429743,0.0127696092927454,"Kerguelen",1.00025,"F"
"ct105-14f-13.ct105-14f-13.30","ct105-14f-13",2014-02-19 15:58:38,7.25,67.01030926921,-55.1807832721029,0,-30.4618793006794,0.0128021422949376,"Kerguelen",1,"F"
"ct105-14f-13.ct105-14f-13.31","ct105-14f-13",2014-02-19 21:58:38,7.5,66.7087290655081,-55.3644724962734,0,-30.4490418222126,0.0128374784667873,"Kerguelen",1,"F"
"ct105-14f-13.ct105-14f-13.32","ct105-14f-13",2014-02-20 03:58:38,7.75,66.470848219962,-55.5521133850509,0,-30.4361662041622,0.0128756180504064,"Kerguelen",1,"F"
"ct105-14f-13.ct105-14f-13.33","ct105-14f-13",2014-02-20 09:58:38,8,66.1600375496713,-55.8337215210977,0,-30.4232496428633,0.0129165612988369,"Kerguelen",1,"F"
"ct105-14f-13.ct105-14f-13.34","ct105-14f-13",2014-02-20 15:58:38,8.25,65.9584842775313,-56.0270551611268,0,-30.4102893343855,0.0129603084778496,"Kerguelen",1,"F"
"ct105-14f-13.ct105-14f-13.35","ct105-14f-13",2014-02-20 21:58:38,8.5,65.7481825679523,-56.184594826401,0,-30.3972824745196,0.0130068598659161,"Kerguelen",1,"F"
"ct105-14f-13.ct105-14f-13.36","ct105-14f-13",2014-02-21 03:58:38,8.75,65.4869383572002,-56.4215465479268,0,-30.3842262587649,0.0130562157547032,"Kerguelen",1,"F"
"ct105-14f-13.ct105-14f-13.37","ct105-14f-13",2014-02-21 09:58:38,9,65.1457138595708,-56.7589746050866,0,-30.3711178823165,0.0131083764483453,"Kerguelen",1,"F"
"ct105-14f-13.ct105-14f-13.38","ct105-14f-13",2014-02-21 15:58:38,9.25,64.9235200703582,-56.9807267296545,0,-30.3579545400512,0.0131633422653155,"Kerguelen",1,"F"
"ct105-14f-13.ct105-14f-13.39","ct105-14f-13",2014-02-21 21:58:38,9.5,64.5644048052365,-57.1800766140365,0,-30.3447334265136,0.0132211135376037,"Kerguelen",1,"F"
"ct105-14f-13.ct105-14f-13.40","ct105-14f-13",2014-02-22 03:58:38,9.75,64.2788675150049,-57.3577732920656,0,-30.3314517359017,0.0132816906119215,"Kerguelen",1,"F"
"ct105-14f-13.ct105-14f-13.41","ct105-14f-13",2014-02-22 09:58:38,10,64.0979132120332,-57.5286778279854,0,-30.3181066620519,0.0133450738498408,"Kerguelen",1,"F"
"ct105-14f-13.ct105-14f-13.42","ct105-14f-13",2014-02-22 15:58:38,10.25,63.8622942094218,-57.7986731366267,0,-30.3046953967243,0.0134112653275176,"Kerguelen",1,"F"
"ct105-14f-13.ct105-14f-13.43","ct105-14f-13",2014-02-22 21:58:38,10.5,63.5618440725288,-58.0171194436186,0,-30.291214843018,0.0134805537063465,"Kerguelen",1,"F"
"ct105-14f-13.ct105-14f-13.44","ct105-14f-13",2014-02-23 03:58:38,10.75,63.3395368608864,-58.2025998792438,0,-30.2776612926763,0.0135535503416662,"Kerguelen",1,"F"
"ct105-14f-13.ct105-14f-13.45","ct105-14f-13",2014-02-23 09:58:38,11,62.9475275537024,-58.4370392034596,0,-30.2640309590566,0.0136303336197408,"Kerguelen",1,"F"
"ct105-14f-13.ct105-14f-13.46","ct105-14f-13",2014-02-23 15:58:38,11.25,62.6612103067647,-58.664018318652,0,-30.2503200549868,0.0137109040697858,"Kerguelen",1,"F"
"ct105-14f-13.ct105-14f-13.47","ct105-14f-13",2014-02-23 21:58:38,11.5,62.367690078061,-58.8971887744169,0,-30.236524792742,0.013795262244809,"Kerguelen",1.00025,"F"
"ct105-14f-13.ct105-14f-13.48","ct105-14f-13",2014-02-24 03:58:38,11.75,62.1382678931714,-59.0273933279905,0,-30.2226413840205,0.0138834087214934,"Kerguelen",1,"F"
"ct105-14f-13.ct105-14f-13.49","ct105-14f-13",2014-02-24 09:58:38,12,61.8048115399984,-59.2374782044976,0,-30.208666039919,0.0139753441015078,"Kerguelen",1,"F"
"ct105-14f-13.ct105-14f-13.50","ct105-14f-13",2014-02-24 15:58:38,12.25,61.4041655233364,-59.4326365242865,0,-30.1945949709061,0.0140710690128942,"Kerguelen",1,"F"
"ct105-14f-13.ct105-14f-13.51","ct105-14f-13",2014-02-24 21:58:38,12.5,61.0873636081199,-59.5733503719044,0,-30.180424386797,0.0141705841091078,"Kerguelen",1,"F"
"ct105-14f-13.ct105-14f-13.52","ct105-14f-13",2014-02-25 03:58:38,12.75,60.9237330958143,-59.7568888527891,0,-30.1661504967244,0.0142738900725914,"Kerguelen",1,"F"
"ct105-14f-13.ct105-14f-13.53","ct105-14f-13",2014-02-25 09:58:38,13,60.6648652875682,-59.994224321513,0,-30.1517695091109,0.0143809876134993,"Kerguelen",1,"F"
"ct105-14f-13.ct105-14f-13.54","ct105-14f-13",2014-02-25 15:58:38,13.25,60.3545600607097,-60.1573425716451,0,-30.137277631638,0.0144918774728608,"Kerguelen",1,"F"
"ct105-14f-13.ct105-14f-13.55","ct105-14f-13",2014-02-25 21:58:38,13.5,59.9624367659659,-60.3399558331089,0,-30.1226710712166,0.0146065604214651,"Kerguelen",1.00075,"F"
"ct105-14f-13.ct105-14f-13.56","ct105-14f-13",2014-02-26 03:58:38,13.75,59.7179566482862,-60.4219296026474,0,-30.1079460339539,0.0147250372626584,"Kerguelen",1,"F"
"ct105-14f-13.ct105-14f-13.57","ct105-14f-13",2014-02-26 09:58:38,14,59.4282978885974,-60.4955374893494,0,-30.0930987251208,0.0148473088331103,"Kerguelen",1,"F"
"ct105-14f-13.ct105-14f-13.58","ct105-14f-13",2014-02-26 15:58:38,14.25,59.1279310587773,-60.6682153726009,0,-30.0781253491173,0.0149733760035409,"Kerguelen",1,"F"
"ct105-14f-13.ct105-14f-13.59","ct105-14f-13",2014-02-26 21:58:38,14.5,58.8149540228761,-60.8253119668224,0,-30.0630221094361,0.0151032396811746,"Kerguelen",1,"F"
"ct105-14f-13.ct105-14f-13.60","ct105-14f-13",2014-02-27 03:58:38,14.75,58.4905164577175,-60.9357804109821,0,-30.0477852086266,0.0152369008094622,"Kerguelen",1,"F"
"ct105-14f-13.ct105-14f-13.61","ct105-14f-13",2014-02-27 09:58:38,15,58.3037503992651,-61.1049990827664,0,-30.0324108482558,0.0153743603708678,"Kerguelen",1,"F"
"ct105-14f-13.ct105-14f-13.62","ct105-14f-13",2014-02-27 15:58:38,15.25,57.9764171764479,-61.3179392321391,0,-30.016895225714,0.0155156225417119,"Kerguelen",1.00025,"F"
"ct105-14f-13.ct105-14f-13.63","ct105-14f-13",2014-02-27 21:58:38,15.5,57.7721430917289,-61.4475083477541,0,-30.0012343136963,0.0156609120177231,"Kerguelen",1,"F"
"ct105-14f-13.ct105-14f-13.64","ct105-14f-13",2014-02-28 03:58:38,15.75,57.5103088463433,-61.5980695449842,0,-29.985423715761,0.0158105979353118,"Kerguelen",1,"F"
"ct105-14f-13.ct105-14f-13.65","ct105-14f-13",2014-02-28 09:58:38,16,57.1705120881217,-61.76317488571,0,-29.9694589999387,0.015964715822353,"Kerguelen",1,"F"
"ct105-14f-13.ct105-14f-13.66","ct105-14f-13",2014-02-28 15:58:38,16.25,56.874003035577,-61.9498049556834,0,-29.9533357329675,0.0161232669711575,"Kerguelen",1,"F"
"ct105-14f-13.ct105-14f-13.67","ct105-14f-13",2014-02-28 21:58:38,16.5,56.605753190642,-62.1980497059545,0,-29.9370494802394,0.0162862527281094,"Kerguelen",1.00025,"F"
"ct105-14f-13.ct105-14f-13.68","ct105-14f-13",2014-03-01 03:58:38,16.75,56.3219293009557,-62.3902715873527,0,-29.920595805743,0.0164536744964139,"Kerguelen",1,"F"
"ct105-14f-13.ct105-14f-13.69","ct105-14f-13",2014-03-01 09:58:38,17,56.026382632899,-62.5950863747479,0,-29.9039702720053,0.0166255337376409,"Kerguelen",1,"F"
"ct105-14f-13.ct105-14f-13.70","ct105-14f-13",2014-03-01 15:58:38,17.25,55.7259217447889,-62.833357454072,0,-29.8871684400312,0.0168018319741448,"Kerguelen",1,"F"
"ct105-14f-13.ct105-14f-13.71","ct105-14f-13",2014-03-01 21:58:38,17.5,55.4972189824889,-62.9691219423233,0,-29.8701859437638,0.0169824962673759,"Kerguelen",1,"F"
"ct105-14f-13.ct105-14f-13.72","ct105-14f-13",2014-03-02 03:58:38,17.75,55.2367161459585,-63.1151218385603,0,-29.853018734262,0.0171672095017783,"Kerguelen",1,"F"
"ct105-14f-13.ct105-14f-13.73","ct105-14f-13",2014-03-02 09:58:38,18,54.8628819263418,-63.2664149072976,0,-29.83566284614,0.0173558881220282,"Kerguelen",1,"F"
"ct105-14f-13.ct105-14f-13.74","ct105-14f-13",2014-03-02 15:58:38,18.25,54.5708678890965,-63.3862036893524,0,-29.8181143123094,0.0175485338305748,"Kerguelen",1,"F"
"ct105-14f-13.ct105-14f-13.75","ct105-14f-13",2014-03-02 21:58:38,18.5,54.3380424667366,-63.4639188817703,0,-29.8003691639105,0.0177451483989177,"Kerguelen",1.0005,"F"
"ct105-14f-13.ct105-14f-13.76","ct105-14f-13",2014-03-03 03:58:38,18.75,54.0825098045814,-63.546341624187,0,-29.7824235267923,0.0179456371182163,"Kerguelen",1,"F"
"ct105-14f-13.ct105-14f-13.77","ct105-14f-13",2014-03-03 09:58:38,19,53.7096336544694,-63.6848297786558,0,-29.7642740715261,0.0181494552661865,"Kerguelen",1,"F"
"ct105-14f-13.ct105-14f-13.78","ct105-14f-13",2014-03-03 15:58:38,19.25,53.32668921384,-63.7626259459073,0,-29.7459176589703,0.0183564125558144,"Kerguelen",1.001,"F"
"ct105-14f-13.ct105-14f-13.79","ct105-14f-13",2014-03-03 21:58:38,19.5,53.1161474400578,-63.7921109896006,0,-29.7273511483004,0.0185665106698762,"Kerguelen",1.00025,"F"
"ct105-14f-13.ct105-14f-13.80","ct105-14f-13",2014-03-04 03:58:38,19.75,52.853494572865,-63.8479025622024,0,-29.7085713967281,0.0187797515723565,"Kerguelen",1,"F"
"ct105-14f-13.ct105-14f-13.81","ct105-14f-13",2014-03-04 09:58:38,20,52.5280481431656,-63.9174305377575,0,-29.6895752594284,0.0189961372996539,"Kerguelen",1,"F"
"ct105-14f-13.ct105-14f-13.82","ct105-14f-13",2014-03-04 15:58:38,20.25,52.2903606950075,-64.0033775368273,0,-29.6703595894667,0.0192156699616974,"Kerguelen",1,"F"
"ct105-14f-13.ct105-14f-13.83","ct105-14f-13",2014-03-04 21:58:38,20.5,51.8990249298941,-64.1997118402342,0,-29.6509212377203,0.019438351746387,"Kerguelen",1.0005,"F"
"ct105-14f-13.ct105-14f-13.84","ct105-14f-13",2014-03-05 03:58:38,20.75,51.6318614189083,-64.2637327999516,0,-29.6312570527996,0.0196641849207035,"Kerguelen",1,"F"
"ct105-14f-13.ct105-14f-13.85","ct105-14f-13",2014-03-05 09:58:38,21,51.1883915733052,-64.4302636192019,0,-29.6113638809661,0.0198931718335515,"Kerguelen",1,"F"
"ct105-14f-13.ct105-14f-13.86","ct105-14f-13",2014-03-05 15:58:38,21.25,50.7458318167373,-64.4595985415914,0,-29.591238566046,0.0201253149200553,"Kerguelen",1,"F"
"ct105-14f-13.ct105-14f-13.87","ct105-14f-13",2014-03-05 21:58:38,21.5,50.3122542469096,-64.5274922803239,0,-29.5708779493446,0.0203606167014092,"Kerguelen",1,"F"
"ct105-14f-13.ct105-14f-13.88","ct105-14f-13",2014-03-06 03:58:38,21.75,49.8203855849423,-64.6535601090372,0,-29.5502788695542,0.0205990797904176,"Kerguelen",1,"F"
"ct105-14f-13.ct105-14f-13.89","ct105-14f-13",2014-03-06 09:58:38,22,49.3937371711911,-64.7466947484408,0,-29.5294381626609,0.0208407068933103,"Kerguelen",1,"F"
"ct105-14f-13.ct105-14f-13.90","ct105-14f-13",2014-03-06 15:58:38,22.25,48.9145162842635,-64.8449416999373,0,-29.5083526618383,0.0210855008225486,"Kerguelen",1,"F"
"ct105-14f-13.ct105-14f-13.91","ct105-14f-13",2014-03-06 21:58:38,22.5,48.5435557648932,-64.9307112010414,0,-29.487019164644,0.0213334971943313,"Kerguelen",1,"F"
"ct105-14f-13.ct105-14f-13.92","ct105-14f-13",2014-03-07 03:58:38,22.75,48.0564842043965,-65.0406005768947,0,-29.4654343595216,0.0215848051224155,"Kerguelen",1,"F"
"ct105-14f-13.ct105-14f-13.93","ct105-14f-13",2014-03-07 09:58:38,23,47.4141376040451,-65.1651000707124,0,-29.4435949102901,0.0218394492314422,"Kerguelen",1,"F"
"ct105-14f-13.ct105-14f-13.94","ct105-14f-13",2014-03-07 15:58:38,23.25,46.9738057142502,-65.2278617172359,0,-29.4214974774963,0.0220974327937939,"Kerguelen",1,"F"
"ct105-14f-13.ct105-14f-13.95","ct105-14f-13",2014-03-07 21:58:38,23.5,46.5103304235003,-65.3792467695773,0,-29.399138718297,0.0223587591993035,"Kerguelen",1.00025,"F"
"ct105-14f-13.ct105-14f-13.96","ct105-14f-13",2014-03-08 03:58:38,23.75,46.2149045285327,-65.4849088172848,0,-29.3765154816425,0.0226232366545231,"Kerguelen",1,"F"
"ct105-14f-13.ct105-14f-13.97","ct105-14f-13",2014-03-08 09:58:38,24,45.921036182168,-65.6289811874865,0,-29.3536254482974,0.0228900333451687,"Kerguelen",1,"F"
"ct105-14f-13.ct105-14f-13.98","ct105-14f-13",2014-03-08 15:58:38,24.25,45.5127980510443,-65.751624109443,0,-29.3304665189284,0.0231589293688994,"Kerguelen",1.0125,"F"
"ct105-14f-13.ct105-14f-13.99","ct105-14f-13",2014-03-08 21:58:38,24.5,45.249742764212,-65.8161374669172,0,-29.3070365907582,0.0234299281702488,"Kerguelen",1.00475,"F"
"ct105-14f-13.ct105-14f-13.100","ct105-14f-13",2014-03-09 03:58:38,24.75,45.0513847013113,-65.8481219295603,0,-29.2833335574562,0.0237030333019639,"Kerguelen",1.0005,"F"
"ct105-14f-13.ct105-14f-13.101","ct105-14f-13",2014-03-09 09:58:38,25,44.7621718407547,-65.9491699008696,0,-29.2593553090282,0.0239782484280138,"Kerguelen",1,"F"
"ct105-14f-13.ct105-14f-13.102","ct105-14f-13",2014-03-09 15:58:38,25.25,44.2888755527149,-66.1381658050791,0,-29.2350997317027,0.024255577325516,"Kerguelen",1,"F"
"ct105-14f-13.ct105-14f-13.103","ct105-14f-13",2014-03-09 21:58:38,25.5,43.8885747483046,-66.2612633423265,0,-29.2105647078151,0.0245350238876452,"Kerguelen",1,"F"
"ct105-14f-13.ct105-14f-13.104","ct105-14f-13",2014-03-10 03:58:38,25.75,43.4549269099304,-66.4785735292652,0,-29.1857481156871,0.0248165921280019,"Kerguelen",1,"F"
"ct105-14f-13.ct105-14f-13.105","ct105-14f-13",2014-03-10 09:58:38,26,43.0808648657394,-66.6234949659116,0,-29.1606478295054,0.0251002861816563,"Kerguelen",1,"F"
"ct105-14f-13.ct105-14f-13.106","ct105-14f-13",2014-03-10 15:58:38,26.25,42.6667822820128,-66.7478261800112,0,-29.1352617191942,0.0253861103111597,"Kerguelen",1.0005,"F"
"ct105-14f-13.ct105-14f-13.107","ct105-14f-13",2014-03-10 21:58:38,26.5,42.4494278288358,-66.8391641018803,0,-29.1095876502868,0.0256740689074442,"Kerguelen",1.00025,"F"
"ct105-14f-13.ct105-14f-13.108","ct105-14f-13",2014-03-11 03:58:38,26.75,42.1077283037397,-66.9391589308409,0,-29.083623483791,0.0259641664957733,"Kerguelen",1,"F"
"ct105-14f-13.ct105-14f-13.109","ct105-14f-13",2014-03-11 09:58:38,27,41.5803543613009,-67.1124431558002,0,-29.0573670760543,0.0262564077367244,"Kerguelen",1.00025,"F"
"ct105-14f-13.ct105-14f-13.110","ct105-14f-13",2014-03-11 15:58:38,27.25,41.1686471754913,-67.1845832268933,0,-29.0308162786222,0.0265507974321399,"Kerguelen",1,"F"
"ct105-14f-13.ct105-14f-13.111","ct105-14f-13",2014-03-11 21:58:38,27.5,40.8671145029999,-67.2442675593685,0,-29.0039689380948,0.0268473405273417,"Kerguelen",1,"F"
"ct105-14f-13.ct105-14f-13.112","ct105-14f-13",2014-03-12 03:58:38,27.75,40.5555561533616,-67.3479978670164,0,-28.9768228959791,0.0271460421157332,"Kerguelen",1,"F"
"ct105-14f-13.ct105-14f-13.113","ct105-14f-13",2014-03-12 09:58:38,28,40.0685042670115,-67.429485900672,0,-28.9493759885362,0.0274469074429129,"Kerguelen",1.00025,"F"
"ct105-14f-13.ct105-14f-13.114","ct105-14f-13",2014-03-12 15:58:38,28.25,39.7125245141695,-67.4349225037993,0,-28.9216260466265,0.027749941909716,"Kerguelen",1.01025,"F"
"ct105-14f-13.ct105-14f-13.115","ct105-14f-13",2014-03-12 21:58:38,28.5,39.5838822214655,-67.4085900504004,0,-28.8935709100658,0.0280551365606951,"Kerguelen",1.0085,"F"
"ct105-14f-13.ct105-14f-13.116","ct105-14f-13",2014-03-13 03:58:38,28.75,39.4260016088076,-67.4702576131899,0,-28.865208700012,0.0283622100537229,"Kerguelen",1.0055,"F"
"ct105-14f-13.ct105-14f-13.117","ct105-14f-13",2014-03-13 09:58:38,29,38.867113351791,-67.5885098291352,0,-28.8365377951388,0.028670904873257,"Kerguelen",2,"F"
"ct105-14f-13.ct105-14f-13.118","ct105-14f-13",2014-03-13 15:58:38,29.25,38.8498831748035,-67.5860207766046,0,-28.8075565781156,0.0289812170232162,"Kerguelen",1.993,"F"
"ct105-14f-13.ct105-14f-13.119","ct105-14f-13",2014-03-13 21:58:38,29.5,38.7586423144092,-67.5829037594626,0,-28.77826343451,0.0292931436055965,"Kerguelen",1.9905,"F"
"ct105-14f-13.ct105-14f-13.120","ct105-14f-13",2014-03-14 03:58:38,29.75,38.7216576142249,-67.6046422208054,0,-28.748657164337,0.0296062701729605,"Kerguelen",1.9895,"F"
"ct105-14f-13.ct105-14f-13.121","ct105-14f-13",2014-03-14 09:58:38,30,38.8142432038643,-67.5789520354392,0,-28.7187371583679,0.0299200059690974,"Kerguelen",1.98425,"F"
"ct105-14f-13.ct105-14f-13.122","ct105-14f-13",2014-03-14 15:58:38,30.25,38.8152244182261,-67.571565849825,0,-28.6885028470193,0.0302343113486536,"Kerguelen",1.9795,"F"
"ct105-14f-13.ct105-14f-13.123","ct105-14f-13",2014-03-14 21:58:38,30.5,38.9185533705088,-67.618794922298,0,-28.6579536548578,0.0305491921614442,"Kerguelen",1.97675,"F"
"ct105-14f-13.ct105-14f-13.124","ct105-14f-13",2014-03-15 03:58:38,30.75,38.910603837919,-67.6606356305453,0,-28.6270890004652,0.0308646543925928,"Kerguelen",1.9755,"F"
"ct105-14f-13.ct105-14f-13.125","ct105-14f-13",2014-03-15 09:58:38,31,38.9248624129346,-67.7004720439783,0,-28.5959082963024,0.0311807041627754,"Kerguelen",1.97825,"F"
"ct105-14f-13.ct105-14f-13.126","ct105-14f-13",2014-03-15 15:58:38,31.25,38.6712191426294,-67.70949243479,0,-28.5644109485697,0.0314973477327118,"Kerguelen",1.97725,"F"
"ct105-14f-13.ct105-14f-13.127","ct105-14f-13",2014-03-15 21:58:38,31.5,38.5480454985103,-67.6583215803227,0,-28.5325965250795,0.0318144234902062,"Kerguelen",1.98,"F"
"ct105-14f-13.ct105-14f-13.128","ct105-14f-13",2014-03-16 03:58:38,31.75,38.5833035532816,-67.6511167862082,0,-28.5004653470769,0.032131178002609,"Kerguelen",1.97325,"F"
"ct105-14f-13.ct105-14f-13.129","ct105-14f-13",2014-03-16 09:58:38,32,38.640653984225,-67.6131091497882,0,-28.4680179445088,0.0324474025681476,"Kerguelen",1.969,"F"
"ct105-14f-13.ct105-14f-13.130","ct105-14f-13",2014-03-16 15:58:38,32.25,38.6289533459935,-67.6190434132254,0,-28.4352548409299,0.0327631035788312,"Kerguelen",1.9575,"F"
"ct105-14f-13.ct105-14f-13.131","ct105-14f-13",2014-03-16 21:58:38,32.5,38.6841833366088,-67.6398079366168,0,-28.402176502724,0.0330783382059774,"Kerguelen",1.94425,"F"
"ct105-14f-13.ct105-14f-13.132","ct105-14f-13",2014-03-17 03:58:38,32.75,38.6584679737245,-67.6485517918806,0,-28.368783311916,0.0333931908079343,"Kerguelen",1.9365,"F"
"ct105-14f-13.ct105-14f-13.133","ct105-14f-13",2014-03-17 09:58:38,33,38.6478725345473,-67.6556709145721,0,-28.335075750922,0.0337075609940674,"Kerguelen",1.92625,"F"
"ct105-14f-13.ct105-14f-13.134","ct105-14f-13",2014-03-17 15:58:38,33.25,38.7817937935387,-67.6658396615965,0,-28.3010543394622,0.0340214114597892,"Kerguelen",1.91225,"F"
"ct105-14f-13.ct105-14f-13.135","ct105-14f-13",2014-03-17 21:58:38,33.5,38.8701838468222,-67.7328871968028,0,-28.2667195912984,0.0343347481637446,"Kerguelen",1.91025,"F"
"ct105-14f-13.ct105-14f-13.136","ct105-14f-13",2014-03-18 03:58:38,33.75,38.8680274684454,-67.7717156267071,0,-28.2320721695332,0.0346474217652271,"Kerguelen",1.9045,"F"
"ct105-14f-13.ct105-14f-13.137","ct105-14f-13",2014-03-18 09:58:38,34,38.9348093782908,-67.7535874017023,0,-28.1971131171516,0.0349590523815668,"Kerguelen",1.898,"F"
"ct105-14f-13.ct105-14f-13.138","ct105-14f-13",2014-03-18 15:58:38,34.25,38.8947817718955,-67.7426119840906,0,-28.1618435296838,0.0352695874677955,"Kerguelen",1.8765,"F"
"ct105-14f-13.ct105-14f-13.139","ct105-14f-13",2014-03-18 21:58:38,34.5,38.969698423693,-67.8822527688776,0,-28.1262645050774,0.0355790246064247,"Kerguelen",1.84225,"F"
"ct105-14f-13.ct105-14f-13.140","ct105-14f-13",2014-03-19 03:58:38,34.75,38.9845107028353,-67.8895860546861,0,-28.090377210118,0.0358872949594191,"Kerguelen",1.57625,"F"
"ct105-14f-13.ct105-14f-13.141","ct105-14f-13",2014-03-19 09:58:38,35,39.0181926679687,-67.9223807472223,0,-28.0541829447587,0.0361942653593239,"Kerguelen",1.345,"F"
"ct105-14f-13.ct105-14f-13.142","ct105-14f-13",2014-03-19 15:58:38,35.25,38.9882831470853,-67.9897018384637,0,-28.0176830343996,0.0364999103590558,"Kerguelen",1.17,"F"
"ct105-14f-13.ct105-14f-13.143","ct105-14f-13",2014-03-19 21:58:38,35.5,38.9357678391279,-68.1122174155789,0,-27.9808787980741,0.0368042363254828,"Kerguelen",1.12825,"F"
"ct105-14f-13.ct105-14f-13.144","ct105-14f-13",2014-03-20 03:58:38,35.75,38.6006942636292,-68.1208745424044,0,-27.943771548384,0.0371072496901714,"Kerguelen",1,"F"
"ct105-14f-13.ct105-14f-13.145","ct105-14f-13",2014-03-20 09:58:38,36,38.2005410583155,-68.1088116060259,0,-27.9063625914352,0.0374089569487368,"Kerguelen",1,"F"
"ct105-14f-13.ct105-14f-13.146","ct105-14f-13",2014-03-20 15:58:38,36.25,37.8301276656136,-67.9937600146988,0,-27.8686532267745,0.037709364660754,"Kerguelen",1.00475,"F"
"ct105-14f-13.ct105-14f-13.147","ct105-14f-13",2014-03-20 21:58:38,36.5,37.4608308893256,-68.0370236630298,0,-27.8306447473241,0.0380084794504076,"Kerguelen",1.0685,"F"
"ct105-14f-13.ct105-14f-13.148","ct105-14f-13",2014-03-21 03:58:38,36.75,37.3525833344533,-68.094316858852,0,-27.7923384393198,0.0383063080042656,"Kerguelen",1.063,"F"
"ct105-14f-13.ct105-14f-13.149","ct105-14f-13",2014-03-21 09:58:38,37,37.3386422763721,-68.0658187338804,0,-27.7537355822465,0.038602857073311,"Kerguelen",1.0365,"F"
"ct105-14f-13.ct105-14f-13.150","ct105-14f-13",2014-03-21 15:58:38,37.25,37.2158180212573,-68.0407907722274,0,-27.7148374487759,0.0388981334705885,"Kerguelen",1.0105,"F"
"ct105-14f-13.ct105-14f-13.151","ct105-14f-13",2014-03-21 21:58:38,37.5,37.0366335876343,-67.9846110379065,0,-27.6756453047038,0.0391921440721199,"Kerguelen",1.00475,"F"
"ct105-14f-13.ct105-14f-13.152","ct105-14f-13",2014-03-22 03:58:38,37.75,36.8885568933849,-67.9505139029739,0,-27.6361604112409,0.0394848934628322,"Kerguelen",1.0005,"F"
"ct105-14f-13.ct105-14f-13.153","ct105-14f-13",2014-03-22 09:58:38,38,36.5811824081426,-67.9678219146707,0,-27.5963840777196,0.0397763335213241,"Kerguelen",1,"F"
"ct105-14f-13.ct105-14f-13.154","ct105-14f-13",2014-03-22 15:58:38,38.25,36.1075029197194,-68.0051612635638,0,-27.5563176621681,0.0400664155515484,"Kerguelen",1,"F"
"ct105-14f-13.ct105-14f-13.155","ct105-14f-13",2014-03-22 21:58:38,38.5,35.694103615309,-67.9938331247708,0,-27.5159625181024,0.0403551440657013,"Kerguelen",1,"F"
"ct105-14f-13.ct105-14f-13.156","ct105-14f-13",2014-03-23 03:58:38,38.75,35.4419181870217,-68.0111826235254,0,-27.475319992011,0.040642526091389,"Kerguelen",1,"F"
"ct105-14f-13.ct105-14f-13.157","ct105-14f-13",2014-03-23 09:58:38,39,35.0027363089284,-68.1279058291491,0,-27.4343914233009,0.0409285687100969,"Kerguelen",1,"F"
"ct105-14f-13.ct105-14f-13.158","ct105-14f-13",2014-03-23 15:58:38,39.25,34.555302550367,-68.1444631990164,0,-27.3931781442448,0.0412132790561293,"Kerguelen",1,"F"
"ct105-14f-13.ct105-14f-13.159","ct105-14f-13",2014-03-23 21:58:38,39.5,33.9604147570115,-68.1841916169842,0,-27.3516814799289,0.0414966643158377,"Kerguelen",1,"F"
"ct105-14f-13.ct105-14f-13.160","ct105-14f-13",2014-03-24 03:58:38,39.75,33.390542252467,-68.078299633457,0,-27.3099027482011,0.041778731727854,"Kerguelen",1,"F"
"ct105-14f-13.ct105-14f-13.161","ct105-14f-13",2014-03-24 09:58:38,40,32.8636598268153,-67.9569051207546,0,-27.2678432596188,0.0420594885822689,"Kerguelen",1.003,"F"
"ct105-14f-13.ct105-14f-13.162","ct105-14f-13",2014-03-24 15:58:38,40.25,32.543193072379,-67.8809814320918,0,-27.2255043407839,0.0423389188349055,"Kerguelen",1.042,"F"
"ct105-14f-13.ct105-14f-13.163","ct105-14f-13",2014-03-24 21:58:38,40.5,32.459348464855,-67.8435846011072,0,-27.182887499054,0.0426168417298645,"Kerguelen",1.0405,"F"
"ct105-14f-13.ct105-14f-13.164","ct105-14f-13",2014-03-25 03:58:38,40.75,32.4403378359561,-67.7426344462649,0,-27.1399943253557,0.0428931736983496,"Kerguelen",1.047,"F"
"ct105-14f-13.ct105-14f-13.165","ct105-14f-13",2014-03-25 09:58:38,41,32.7209053841644,-67.7360303227454,0,-27.0968264041835,0.043167921172127,"Kerguelen",1.0055,"F"
"ct105-14f-13.ct105-14f-13.166","ct105-14f-13",2014-03-25 15:58:38,41.25,32.9666891082436,-67.7301562138565,0,-27.0533853129911,0.0434410911924699,"Kerguelen",1,"F"
"ct105-14f-13.ct105-14f-13.167","ct105-14f-13",2014-03-25 21:58:38,41.5,33.2987990568723,-67.6086754960092,0,-27.0096726221641,0.0437126908269692,"Kerguelen",1.00925,"F"
"ct105-14f-13.ct105-14f-13.168","ct105-14f-13",2014-03-26 03:58:38,41.75,33.684717381318,-67.5530503812034,0,-26.9656898949963,0.0439827271677684,"Kerguelen",1.77475,"F"
"ct105-14f-13.ct105-14f-13.169","ct105-14f-13",2014-03-26 09:58:38,42,33.6840567890433,-67.6690599488328,0,-26.9214386876648,0.0442512073315138,"Kerguelen",1.67625,"F"
"ct105-14f-13.ct105-14f-13.170","ct105-14f-13",2014-03-26 15:58:38,42.25,33.8855820702381,-67.6527006486813,0,-26.876920549207,0.0445181384578053,"Kerguelen",1.00525,"F"
"ct105-14f-13.ct105-14f-13.171","ct105-14f-13",2014-03-26 21:58:38,42.5,34.2945880499594,-67.5629499374624,0,-26.8321370214977,0.0447835277093411,"Kerguelen",1,"F"
"ct105-14f-13.ct105-14f-13.172","ct105-14f-13",2014-03-27 03:58:38,42.75,34.742597454924,-67.4520904044829,0,-26.7870896392291,0.0450473822686148,"Kerguelen",1,"F"
"ct105-14f-13.ct105-14f-13.173","ct105-14f-13",2014-03-27 09:58:38,43,35.1571513367746,-67.4431929308014,0,-26.7417799298897,0.0453097093393529,"Kerguelen",1.00125,"F"
"ct105-14f-13.ct105-14f-13.174","ct105-14f-13",2014-03-27 15:58:38,43.25,35.5605977962654,-67.3443131398953,0,-26.6962094137455,0.0455705161442554,"Kerguelen",1.1465,"F"
"ct105-14f-13.ct105-14f-13.175","ct105-14f-13",2014-03-27 21:58:38,43.5,35.675484289615,-67.2858425765196,0,-26.6503796038211,0.0458298099243803,"Kerguelen",1.13825,"F"
"ct105-14f-13.ct105-14f-13.176","ct105-14f-13",2014-03-28 03:58:38,43.75,35.8661944207011,-67.2157662891522,0,-26.6042920058828,0.0460875979382824,"Kerguelen",1.16575,"F"
"ct105-14f-13.ct105-14f-13.177","ct105-14f-13",2014-03-28 09:58:38,44,36.132143349393,-67.179331059313,0,-26.557948118422,0.0463438874608202,"Kerguelen",1.52775,"F"
"ct105-14f-13.ct105-14f-13.178","ct105-14f-13",2014-03-28 15:58:38,44.25,36.0777217837831,-67.1815926173129,0,-26.5113494326599,0.0465986857621226,"Kerguelen",1.514,"F"
"ct105-14f-13.ct105-14f-13.179","ct105-14f-13",2014-03-28 21:58:38,44.5,36.1129672425081,-67.1918585078505,0,-26.4644974542736,0.0468519783862809,"Kerguelen",1.495,"F"
"ct105-14f-13.ct105-14f-13.180","ct105-14f-13",2014-03-29 03:58:38,44.75,36.1717337709323,-67.1283274380943,0,-26.4173937449887,0.0471037092848681,"Kerguelen",1.45675,"F"
"ct105-14f-13.ct105-14f-13.181","ct105-14f-13",2014-03-29 09:58:38,45,36.1274284491616,-67.077114124457,0,-26.3700398708301,0.0473538741586454,"Kerguelen",1.41725,"F"
"ct105-14f-13.ct105-14f-13.182","ct105-14f-13",2014-03-29 15:58:38,45.25,36.0080811734284,-67.0407587475268,0,-26.3224373906855,0.047602480144604,"Kerguelen",1.39025,"F"
"ct105-14f-13.ct105-14f-13.183","ct105-14f-13",2014-03-29 21:58:38,45.5,35.9185224871043,-67.02272376905,0,-26.2745878563042,0.0478495343812502,"Kerguelen",1.37375,"F"
"ct105-14f-13.ct105-14f-13.184","ct105-14f-13",2014-03-30 03:58:38,45.75,35.9493088601902,-67.0225249843953,0,-26.2264928122963,0.0480950440079508,"Kerguelen",1.33875,"F"
"ct105-14f-13.ct105-14f-13.185","ct105-14f-13",2014-03-30 09:58:38,46,35.8891911828643,-67.0064229056831,0,-26.1781537961317,0.0483390161645392,"Kerguelen",1.2865,"F"
"ct105-14f-13.ct105-14f-13.186","ct105-14f-13",2014-03-30 15:58:38,46.25,35.8921644914408,-66.9980070675594,0,-26.1295723381431,0.0485814579886334,"Kerguelen",1.209,"F"
"ct105-14f-13.ct105-14f-13.187","ct105-14f-13",2014-03-30 21:58:38,46.5,35.9909527662456,-66.9795323549154,0,-26.0807499615273,0.0488223766157703,"Kerguelen",1.10875,"F"
"ct105-14f-13.ct105-14f-13.188","ct105-14f-13",2014-03-31 03:58:38,46.75,36.1573694181282,-66.9920389448981,0,-26.0316881829734,0.0490617785538661,"Kerguelen",1.05325,"F"
"ct105-14f-13.ct105-14f-13.189","ct105-14f-13",2014-03-31 09:58:38,47,36.3674629942606,-67.0697764644076,0,-25.9823885386114,0.0492996443620664,"Kerguelen",1.048,"F"
"ct105-14f-13.ct105-14f-13.190","ct105-14f-13",2014-03-31 15:58:38,47.25,36.6422433124499,-67.1674176108935,0,-25.9328525934292,0.0495359451821387,"Kerguelen",1.219,"F"
"ct105-14f-13.ct105-14f-13.191","ct105-14f-13",2014-03-31 21:58:38,47.5,36.796045310849,-67.1791970144642,0,-25.8830819079995,0.0497706854297841,"Kerguelen",1.305,"F"
"ct105-14f-13.ct105-14f-13.192","ct105-14f-13",2014-04-01 03:58:38,47.75,36.7557565785773,-67.2329705992714,0,-25.8330780359525,0.0500038720469498,"Kerguelen",1.32125,"F"
"ct105-14f-13.ct105-14f-13.193","ct105-14f-13",2014-04-01 09:58:38,48,36.6635819173467,-67.3711390415426,0,-25.7828425239929,0.0502355119595621,"Kerguelen",1.424,"F"
"ct105-14f-13.ct105-14f-13.194","ct105-14f-13",2014-04-01 15:58:38,48.25,36.6638944042026,-67.4257224756504,0,-25.7323769119161,0.0504656120768776,"Kerguelen",1.47625,"F"
"ct105-14f-13.ct105-14f-13.195","ct105-14f-13",2014-04-01 21:58:38,48.5,36.6592726410332,-67.4377020724799,0,-25.6816827349673,0.0506941769487734,"Kerguelen",1.511,"F"
"ct105-14f-13.ct105-14f-13.196","ct105-14f-13",2014-04-02 03:58:38,48.75,36.6600580029721,-67.4495332300305,0,-25.6307615940266,0.0509211409407351,"Kerguelen",1.545,"F"
"ct105-14f-13.ct105-14f-13.197","ct105-14f-13",2014-04-02 09:58:38,49,36.7398959985693,-67.5062155692729,0,-25.5796151680284,0.0511464259981664,"Kerguelen",1.58325,"F"
"ct105-14f-13.ct105-14f-13.198","ct105-14f-13",2014-04-02 15:58:38,49.25,36.7602986501934,-67.4834206483217,0,-25.5282451346747,0.0513700333537259,"Kerguelen",1.59175,"F"
"ct105-14f-13.ct105-14f-13.199","ct105-14f-13",2014-04-02 21:58:38,49.5,36.7720353863942,-67.4599606954702,0,-25.4766532436779,0.0515918909967383,"Kerguelen",1.60225,"F"
"ct105-14f-13.ct105-14f-13.200","ct105-14f-13",2014-04-03 03:58:38,49.75,36.7780783634518,-67.4338233879875,0,-25.4248414136491,0.051811830028875,"Kerguelen",1.61275,"F"
"ct105-14f-13.ct105-14f-13.201","ct105-14f-13",2014-04-03 09:58:38,50,36.8264914207736,-67.4259988981652,0,-25.3728115813493,0.0520298322997159,"Kerguelen",1.62475,"F"
"ct105-14f-13.ct105-14f-13.202","ct105-14f-13",2014-04-03 15:58:38,50.25,36.790073217952,-67.470593259714,0,-25.3205656781282,0.0522459032211209,"Kerguelen",1.619,"F"
"ct105-14f-13.ct105-14f-13.203","ct105-14f-13",2014-04-03 21:58:38,50.5,36.7785901169904,-67.4600063272454,0,-25.2681056303427,0.0524600477854686,"Kerguelen",1.60475,"F"
"ct105-14f-13.ct105-14f-13.204","ct105-14f-13",2014-04-04 03:58:38,50.75,36.7482847703346,-67.4492677727619,0,-25.2154333648737,0.052672265469017,"Kerguelen",1.5885,"F"
"ct105-14f-13.ct105-14f-13.205","ct105-14f-13",2014-04-04 09:58:38,51,36.7149193327163,-67.4367826138764,0,-25.162550808625,0.0528825562487012,"Kerguelen",1.58125,"F"
"ct105-14f-13.ct105-14f-13.206","ct105-14f-13",2014-04-04 15:58:38,51.25,36.7452442073196,-67.5037356193624,0,-25.1094599257469,0.0530908828781484,"Kerguelen",1.5615,"F"
"ct105-14f-13.ct105-14f-13.207","ct105-14f-13",2014-04-04 21:58:38,51.5,36.6906908106197,-67.5165653413104,0,-25.0561627562638,0.0532971694830797,"Kerguelen",1.5045,"F"
"ct105-14f-13.ct105-14f-13.208","ct105-14f-13",2014-04-05 03:58:38,51.75,36.7425103130693,-67.486728730955,0,-25.0026613448139,0.05350141144988,"Kerguelen",1.41925,"F"
"ct105-14f-13.ct105-14f-13.209","ct105-14f-13",2014-04-05 09:58:38,52,36.4693329269909,-67.5708331907323,0,-24.9489577316694,0.0537036131445234,"Kerguelen",1.0565,"F"
"ct105-14f-13.ct105-14f-13.210","ct105-14f-13",2014-04-05 15:58:38,52.25,36.1967316113072,-67.5782233160913,0,-24.8950539528452,0.0539037788241631,"Kerguelen",1.0005,"F"
"ct105-14f-13.ct105-14f-13.211","ct105-14f-13",2014-04-05 21:58:38,52.5,35.7009078299409,-67.6736004664601,0,-24.8409520402113,0.0541019126339443,"Kerguelen",1.002,"F"
"ct105-14f-13.ct105-14f-13.212","ct105-14f-13",2014-04-06 03:58:38,52.75,35.4496966991319,-67.7173708375028,0,-24.7866540216053,0.0542980186059916,"Kerguelen",1,"F"
"ct105-14f-13.ct105-14f-13.213","ct105-14f-13",2014-04-06 09:58:38,53,34.9901358413605,-67.8121455289976,0,-24.7321619209508,0.0544921006545435,"Kerguelen",1,"F"
"ct105-14f-13.ct105-14f-13.214","ct105-14f-13",2014-04-06 15:58:38,53.25,34.4143683102449,-67.8631547599087,0,-24.6774777583757,0.0546841625750444,"Kerguelen",1,"F"
"ct105-14f-13.ct105-14f-13.215","ct105-14f-13",2014-04-06 21:58:38,53.5,33.8258526778973,-67.8724470299465,0,-24.6226035503343,0.0548742080414166,"Kerguelen",1,"F"
"ct105-14f-13.ct105-14f-13.216","ct105-14f-13",2014-04-07 03:58:38,53.75,33.2556012382825,-67.8935631437103,0,-24.5675413097316,0.0550622406026574,"Kerguelen",1.00025,"F"
"ct105-14f-13.ct105-14f-13.217","ct105-14f-13",2014-04-07 09:58:38,54,32.9129324588053,-67.9533499936234,0,-24.5122930460511,0.055248263680488,"Kerguelen",1.0005,"F"
"ct105-14f-13.ct105-14f-13.218","ct105-14f-13",2014-04-07 15:58:38,54.25,32.60745354665,-68.000833833283,0,-24.4568607654841,0.0554322805670304,"Kerguelen",1.00075,"F"
"ct105-14f-13.ct105-14f-13.219","ct105-14f-13",2014-04-07 21:58:38,54.5,32.3774237563805,-68.1308343968025,0,-24.4012464710627,0.0556142944214216,"Kerguelen",1.0045,"F"
"ct105-14f-13.ct105-14f-13.220","ct105-14f-13",2014-04-08 03:58:38,54.75,32.1087794898623,-68.1944415693647,0,-24.3454521627945,0.0557943082682449,"Kerguelen",1.017,"F"
"ct105-14f-13.ct105-14f-13.221","ct105-14f-13",2014-04-08 09:58:38,55,31.9037800195407,-68.0864837922808,0,-24.2894798378009,0.0559723249935057,"Kerguelen",1.02025,"F"
"ct105-14f-13.ct105-14f-13.222","ct105-14f-13",2014-04-08 15:58:38,55.25,31.6773698943417,-68.0435578747586,0,-24.2333314904588,0.0561483473420971,"Kerguelen",1.046,"F"
"ct105-14f-13.ct105-14f-13.223","ct105-14f-13",2014-04-08 21:58:38,55.5,31.5356688734105,-68.0559881115108,0,-24.1770091125425,0.056322377916343,"Kerguelen",1.07625,"F"
"ct105-14f-13.ct105-14f-13.224","ct105-14f-13",2014-04-09 03:58:38,55.75,31.5369294990516,-68.086264516276,0,-24.1205146933713,0.0564944191712047,"Kerguelen",1.07525,"F"
"ct105-14f-13.ct105-14f-13.225","ct105-14f-13",2014-04-09 09:58:38,56,31.326309673735,-68.0762337307022,0,-24.0638502199579,0.0566644734134258,"Kerguelen",1.07725,"F"
"ct105-14f-13.ct105-14f-13.226","ct105-14f-13",2014-04-09 15:58:38,56.25,31.1457245655363,-68.1125638780502,0,-24.0070176771608,0.0568325427970529,"Kerguelen",1.1,"F"
"ct105-14f-13.ct105-14f-13.227","ct105-14f-13",2014-04-09 21:58:38,56.5,31.0180978575781,-68.1486832721657,0,-23.9500190478399,0.0569986293209007,"Kerguelen",1.1255,"F"
"ct105-14f-13.ct105-14f-13.228","ct105-14f-13",2014-04-10 03:58:38,56.75,31.0230656083996,-68.1764677389126,0,-23.8928563265826,0.05716272125732,"Kerguelen",1.13,"F"
"ct105-14f-13.ct105-14f-13.229","ct105-14f-13",2014-04-10 09:58:38,57,31.0621205865313,-68.2011250136722,0,-23.8355315555298,0.0573247710528163,"Kerguelen",1.13125,"F"
"ct105-14f-13.ct105-14f-13.230","ct105-14f-13",2014-04-10 15:58:38,57.25,31.1432432938977,-68.1501052697241,0,-23.7780467867026,0.0574847688272206,"Kerguelen",1.1305,"F"
"ct105-14f-13.ct105-14f-13.231","ct105-14f-13",2014-04-10 21:58:38,57.5,31.138078241649,-68.1274017711069,0,-23.7204040710834,0.0576427156191966,"Kerguelen",1.12375,"F"
"ct105-14f-13.ct105-14f-13.232","ct105-14f-13",2014-04-11 03:58:38,57.75,31.1866693206336,-68.1027112826591,0,-23.6626054587956,0.0577986122877711,"Kerguelen",1.113,"F"
"ct105-14f-13.ct105-14f-13.233","ct105-14f-13",2014-04-11 09:58:38,58,31.4177292440774,-68.1417041059579,0,-23.6046529992877,0.057952459507854,"Kerguelen",1.10925,"F"
"ct105-14f-13.ct105-14f-13.234","ct105-14f-13",2014-04-11 15:58:38,58.25,31.68166789019,-68.238068588891,0,-23.5465487415174,0.05810425777035,"Kerguelen",1.35275,"F"
"ct105-14f-13.ct105-14f-13.235","ct105-14f-13",2014-04-11 21:58:38,58.5,31.8354325864684,-68.1820212066092,0,-23.488294734143,0.0582540073744031,"Kerguelen",1.34925,"F"
"ct105-14f-13.ct105-14f-13.236","ct105-14f-13",2014-04-12 03:58:38,58.75,32.0399783920018,-68.1067792362567,0,-23.4298930257148,0.0584017084281768,"Kerguelen",1.4545,"F"
"ct105-14f-13.ct105-14f-13.237","ct105-14f-13",2014-04-12 09:58:38,59,32.2049369797156,-68.0052085796,0,-23.3713456648719,0.0585473608429449,"Kerguelen",1.97975,"F"
"ct105-14f-13.ct105-14f-13.238","ct105-14f-13",2014-04-12 15:58:38,59.25,32.0619043327466,-68.0237771059028,0,-23.3126547005403,0.0586909643315592,"Kerguelen",1.994,"F"
"ct105-14f-13.ct105-14f-13.239","ct105-14f-13",2014-04-12 21:58:38,59.5,32.1411651420881,-68.077718973309,0,-23.2538221821374,0.058832518402907,"Kerguelen",1.99775,"F"
"ct105-14f-13.ct105-14f-13.240","ct105-14f-13",2014-04-13 03:58:38,59.75,31.9812132294184,-68.1084354855998,0,-23.1948501597767,0.0589720223607093,"Kerguelen",1.99975,"F"
"ct105-14f-13.ct105-14f-13.241","ct105-14f-13",2014-04-13 09:58:38,60,32.1102845392095,-67.9902444785644,0,-23.135740684478,0.0591094752986743,"Kerguelen",1.9995,"F"
"ct109-186-14.ct109-186-14.3067","ct109-186-14",2015-02-09 11:27:56,0.25,69.8834471559318,-51.2647378721863,0,-34.4988144246083,0.0318162673622335,"Kerguelen",1,"F"
"ct109-186-14.ct109-186-14.3068","ct109-186-14",2015-02-09 17:27:56,0.5,69.8286562618047,-51.4460745139553,0,-34.467042465784,0.0317719588242726,"Kerguelen",1,"F"
"ct109-186-14.ct109-186-14.3069","ct109-186-14",2015-02-09 23:27:56,0.75,69.5702913727671,-51.624323528315,0,-34.4353525598678,0.0316899059161935,"Kerguelen",1,"F"
"ct109-186-14.ct109-186-14.3070","ct109-186-14",2015-02-10 05:27:56,1,69.3438655990358,-51.8081798230054,0,-34.4037824175399,0.0315701423278858,"Kerguelen",1,"F"
"ct109-186-14.ct109-186-14.3071","ct109-186-14",2015-02-10 11:27:56,1.25,69.2649264326544,-51.9825613748681,0,-34.3723697167642,0.031412700775757,"Kerguelen",1,"F"
"ct109-186-14.ct109-186-14.3072","ct109-186-14",2015-02-10 17:27:56,1.5,69.0739239886828,-52.1882117797073,0,-34.3411521039016,0.0312176128625941,"Kerguelen",1,"F"
"ct109-186-14.ct109-186-14.3073","ct109-186-14",2015-02-10 23:27:56,1.75,68.8025949339208,-52.3806273943484,0,-34.3101671946235,0.0309849092780756,"Kerguelen",1,"F"
"ct109-186-14.ct109-186-14.3074","ct109-186-14",2015-02-11 05:27:56,2,68.6150761464632,-52.5479958253311,0,-34.2794477531855,0.0307194414379708,"Kerguelen",1.00025,"F"
"ct109-186-14.ct109-186-14.3075","ct109-186-14",2015-02-11 11:27:56,2.25,68.566269357857,-52.6782440180733,0,-34.2490094404505,0.030438312735076,"Kerguelen",1,"F"
"ct109-186-14.ct109-186-14.3076","ct109-186-14",2015-02-11 17:27:56,2.5,68.4288008602007,-52.8742995364032,0,-34.2188641291447,0.0301453113057459,"Kerguelen",1,"F"
"ct109-186-14.ct109-186-14.3077","ct109-186-14",2015-02-11 23:27:56,2.75,68.2981553340798,-53.089461025096,0,-34.1890236869724,0.029840442172302,"Kerguelen",1.00025,"F"
"ct109-186-14.ct109-186-14.3078","ct109-186-14",2015-02-12 05:27:56,3,67.9842757406631,-53.1772469534545,0,-34.159499977002,0.0295237099704138,"Kerguelen",1,"F"
"ct109-186-14.ct109-186-14.3079","ct109-186-14",2015-02-12 11:27:56,3.25,67.6805922575748,-53.2322170750705,0,-34.1303049144481,0.0291950625538773,"Kerguelen",1,"F"
"ct109-186-14.ct109-186-14.3080","ct109-186-14",2015-02-12 17:27:56,3.5,67.4582133968592,-53.3359554616724,0,-34.1014518036558,0.0288531107922985,"Kerguelen",1,"F"
"ct109-186-14.ct109-186-14.3081","ct109-186-14",2015-02-12 23:27:56,3.75,67.2125880791718,-53.5017227190571,0,-34.0729545094053,0.0284972942505457,"Kerguelen",1,"F"
"ct109-186-14.ct109-186-14.3082","ct109-186-14",2015-02-13 05:27:56,4,66.975031934563,-53.6840242894298,0,-34.0448153348484,0.0281391745568293,"Kerguelen",1,"F"
"ct109-186-14.ct109-186-14.3083","ct109-186-14",2015-02-13 11:27:56,4.25,66.7949159508469,-53.8715542865753,0,-34.0170283897672,0.027786945081254,"Kerguelen",1,"F"
"ct109-186-14.ct109-186-14.3084","ct109-186-14",2015-02-13 17:27:56,4.5,66.5447973797914,-54.0798858182973,0,-33.9895876219944,0.0274407677727628,"Kerguelen",1,"F"
"ct109-186-14.ct109-186-14.3085","ct109-186-14",2015-02-13 23:27:56,4.75,66.3663961447956,-54.261329523054,0,-33.9624869889451,0.0271006330493151,"Kerguelen",1,"F"
"ct109-186-14.ct109-186-14.3086","ct109-186-14",2015-02-14 05:27:56,5,66.1065520332747,-54.4305335096851,0,-33.9357204573038,0.0267665316413201,"Kerguelen",1,"F"
"ct109-186-14.ct109-186-14.3087","ct109-186-14",2015-02-14 11:27:56,5.25,65.7653572958382,-54.6331580505528,0,-33.9092820027143,0.0264384545895058,"Kerguelen",1,"F"
"ct109-186-14.ct109-186-14.3088","ct109-186-14",2015-02-14 17:27:56,5.5,65.5161673809626,-54.82263116489,0,-33.8831656094848,0.0261163932295083,"Kerguelen",1,"F"
"ct109-186-14.ct109-186-14.3089","ct109-186-14",2015-02-14 23:27:56,5.75,65.2358681506599,-55.021986755552,0,-33.8573652703026,0.0258003391821249,"Kerguelen",1,"F"
"ct109-186-14.ct109-186-14.3090","ct109-186-14",2015-02-15 05:27:56,6,64.9405067077254,-55.2039141413403,0,-33.8318749859529,0.0254902843497773,"Kerguelen",1,"F"
"ct109-186-14.ct109-186-14.3091","ct109-186-14",2015-02-15 11:27:56,6.25,64.5866518192689,-55.4206364302133,0,-33.8066887650545,0.0251862208983933,"Kerguelen",1,"F"
"ct109-186-14.ct109-186-14.3092","ct109-186-14",2015-02-15 17:27:56,6.5,64.251755726115,-55.612329568356,0,-33.7818006237968,0.0248881412577173,"Kerguelen",1,"F"
"ct109-186-14.ct109-186-14.3093","ct109-186-14",2015-02-15 23:27:56,6.75,64.0425249109454,-55.762473707082,0,-33.7572028068682,0.0245978169285899,"Kerguelen",1,"F"
"ct109-186-14.ct109-186-14.3094","ct109-186-14",2015-02-16 05:27:56,7,63.8251158039597,-55.9611690856408,0,-33.7328605401364,0.0243422667317916,"Kerguelen",1,"F"
"ct109-186-14.ct109-186-14.3095","ct109-186-14",2015-02-16 11:27:56,7.25,63.7185083940049,-56.1129926922157,0,-33.7087180559431,0.024142484193318,"Kerguelen",1,"F"
"ct109-186-14.ct109-186-14.3096","ct109-186-14",2015-02-16 17:27:56,7.5,63.6264147731065,-56.2314056412728,0,-33.6847184985484,0.0239995573946827,"Kerguelen",1,"F"
"ct109-186-14.ct109-186-14.3097","ct109-186-14",2015-02-16 23:27:56,7.75,63.4185171317843,-56.3709255856945,0,-33.6608010829968,0.0239174155515387,"Kerguelen",1,"F"
"ct109-186-14.ct109-186-14.3098","ct109-186-14",2015-02-17 05:27:56,8,63.1302408617658,-56.53211418482,0,-33.6369033719465,0.0238977110503191,"Kerguelen",1,"F"
"ct109-186-14.ct109-186-14.3099","ct109-186-14",2015-02-17 11:27:56,8.25,62.8157846936629,-56.7312909418119,0,-33.6129629557148,0.0239404162316714,"Kerguelen",1,"F"
"ct109-186-14.ct109-186-14.3100","ct109-186-14",2015-02-17 17:27:56,8.5,62.5785911755398,-56.9004900134775,0,-33.5889174578022,0.0240454979126337,"Kerguelen",1,"F"
"ct109-186-14.ct109-186-14.3101","ct109-186-14",2015-02-17 23:27:56,8.75,62.3268409071394,-57.0453246071203,0,-33.5647045344148,0.0242129233874178,"Kerguelen",1,"F"
"ct109-186-14.ct109-186-14.3102","ct109-186-14",2015-02-18 05:27:56,9,62.0417868866953,-57.2322148170082,0,-33.5402618741744,0.0244426602404424,"Kerguelen",1,"F"
"ct109-186-14.ct109-186-14.3103","ct109-186-14",2015-02-18 11:27:56,9.25,61.655928280957,-57.5032442733894,0,-33.5155271980163,0.0247346761580114,"Kerguelen",1,"F"
"ct109-186-14.ct109-186-14.3104","ct109-186-14",2015-02-18 17:27:56,9.5,61.1544933870965,-57.6975428494537,0,-33.4904382592563,0.0250889387600373,"Kerguelen",1,"F"
"ct109-186-14.ct109-186-14.3105","ct109-186-14",2015-02-18 23:27:56,9.75,60.7029273607879,-57.8812865746741,0,-33.464932843803,0.0255054154532808,"Kerguelen",1,"F"
"ct109-186-14.ct109-186-14.3106","ct109-186-14",2015-02-19 05:27:56,10,60.4201099855299,-58.0603092326423,0,-33.4389487705188,0.0259840732842243,"Kerguelen",1,"F"
"ct109-186-14.ct109-186-14.3107","ct109-186-14",2015-02-19 11:27:56,10.25,60.128224297619,-58.3075040895112,0,-33.4124238916915,0.026524878827322,"Kerguelen",1,"F"
"ct109-186-14.ct109-186-14.3108","ct109-186-14",2015-02-19 17:27:56,10.5,59.8503987143202,-58.5519531845713,0,-33.3852960936203,0.027127798071197,"Kerguelen",1,"F"
"ct109-186-14.ct109-186-14.3109","ct109-186-14",2015-02-19 23:27:56,10.75,59.4880270647187,-58.7927290005266,0,-33.3575030986549,0.0277929949653588,"Kerguelen",1,"F"
"ct109-186-14.ct109-186-14.3110","ct109-186-14",2015-02-20 05:27:56,11,59.0934114767522,-58.9753719675132,0,-33.3289745863429,0.0285285123120371,"Kerguelen",1,"F"
"ct109-186-14.ct109-186-14.3111","ct109-186-14",2015-02-20 11:27:56,11.25,58.5968470485606,-59.1082421097264,0,-33.2996295728556,0.0293450134873308,"Kerguelen",1,"F"
"ct109-186-14.ct109-186-14.3112","ct109-186-14",2015-02-20 17:27:56,11.5,58.1126252496721,-59.251848407944,0,-33.2693863856909,0.0302431871646414,"Kerguelen",1,"F"
"ct109-186-14.ct109-186-14.3113","ct109-186-14",2015-02-20 23:27:56,11.75,57.824725827217,-59.3930996043313,0,-33.2381634024427,0.0312229832482025,"Kerguelen",1,"F"
"ct109-186-14.ct109-186-14.3114","ct109-186-14",2015-02-21 05:27:56,12,57.4938611646826,-59.5891288434379,0,-33.2058790521678,0.0322843502749304,"Kerguelen",1,"F"
"ct109-186-14.ct109-186-14.3115","ct109-186-14",2015-02-21 11:27:56,12.25,57.2434408416013,-59.7775860957376,0,-33.1724518167456,0.0334272354222231,"Kerguelen",1,"F"
"ct109-186-14.ct109-186-14.3116","ct109-186-14",2015-02-21 17:27:56,12.5,57.0031917723763,-59.9317412511943,0,-33.1378002321741,0.0346515845714879,"Kerguelen",1,"F"
"ct109-186-14.ct109-186-14.3117","ct109-186-14",2015-02-21 23:27:56,12.75,56.56851222043,-60.0494806713926,0,-33.1018428897441,0.0359573424299653,"Kerguelen",1,"F"
"ct109-186-14.ct109-186-14.3118","ct109-186-14",2015-02-22 05:27:56,13,56.2203409245486,-60.1587731803455,0,-33.0644991670854,0.0373437226586892,"Kerguelen",1.00125,"F"
"ct109-186-14.ct109-186-14.3119","ct109-186-14",2015-02-22 11:27:56,13.25,56.0160509379483,-60.1873623638662,0,-33.0256984995389,0.038800667546518,"Kerguelen",1,"F"
"ct109-186-14.ct109-186-14.3120","ct109-186-14",2015-02-22 17:27:56,13.5,55.6551559727527,-60.2849134712029,0,-32.9853760016445,0.0403224978944183,"Kerguelen",1,"F"
"ct109-186-14.ct109-186-14.3121","ct109-186-14",2015-02-22 23:27:56,13.75,55.2169954397987,-60.4887086383995,0,-32.9434665574627,0.0419094441817758,"Kerguelen",1,"F"
"ct109-186-14.ct109-186-14.3122","ct109-186-14",2015-02-23 05:27:56,14,55.047904872583,-60.6604354059022,0,-32.8999046869955,0.0435618704671792,"Kerguelen",1,"F"
"ct109-186-14.ct109-186-14.3123","ct109-186-14",2015-02-23 11:27:56,14.25,54.8790473442787,-60.7688182163713,0,-32.854622689979,0.0452819970165108,"Kerguelen",1,"F"
"ct109-186-14.ct109-186-14.3124","ct109-186-14",2015-02-23 17:27:56,14.5,54.5114403289582,-60.906412178429,0,-32.8075521309154,0.0470705590635889,"Kerguelen",1,"F"
"ct109-186-14.ct109-186-14.3125","ct109-186-14",2015-02-23 23:27:56,14.75,54.1486706036625,-61.0283422405847,0,-32.758624615431,0.0489275154844648,"Kerguelen",1,"F"
"ct109-186-14.ct109-186-14.3126","ct109-186-14",2015-02-24 05:27:56,15,53.9178974938649,-61.0995727840222,0,-32.7077717878158,0.0508528276151166,"Kerguelen",1.00025,"F"
"ct109-186-14.ct109-186-14.3127","ct109-186-14",2015-02-24 11:27:56,15.25,53.7425514335005,-61.1446320562257,0,-32.6549253270368,0.0528464607790935,"Kerguelen",1,"F"
"ct109-186-14.ct109-186-14.3128","ct109-186-14",2015-02-24 17:27:56,15.5,53.5480952086966,-61.2528404855318,0,-32.6000169418644,0.0549083851723309,"Kerguelen",1,"F"
"ct109-186-14.ct109-186-14.3129","ct109-186-14",2015-02-24 23:27:56,15.75,53.3592688136652,-61.3945878949909,0,-32.5429783649991,0.0570385768653314,"Kerguelen",1.00075,"F"
"ct109-186-14.ct109-186-14.3130","ct109-186-14",2015-02-25 05:27:56,16,53.1729786720147,-61.4452899957156,0,-32.4837413461051,0.0592370188940317,"Kerguelen",1,"F"
"ct109-186-14.ct109-186-14.3131","ct109-186-14",2015-02-25 11:27:56,16.25,52.8780531229566,-61.5324596965111,0,-32.4222376805979,0.0615036655071954,"Kerguelen",1,"F"
"ct109-186-14.ct109-186-14.3132","ct109-186-14",2015-02-25 17:27:56,16.5,52.4204353858134,-61.7209289536763,0,-32.3583996495112,0.0638380310866382,"Kerguelen",1,"F"
"ct109-186-14.ct109-186-14.3133","ct109-186-14",2015-02-25 23:27:56,16.75,52.1286499726833,-61.8689386301781,0,-32.2921598362935,0.0662398132177278,"Kerguelen",1,"F"
"ct109-186-14.ct109-186-14.3134","ct109-186-14",2015-02-26 05:27:56,17,51.832821510295,-62.0384751746421,0,-32.2234488974132,0.0687109388803342,"Kerguelen",1,"F"
"ct109-186-14.ct109-186-14.3135","ct109-186-14",2015-02-26 11:27:56,17.25,51.4139014751146,-62.2763290910957,0,-32.1521943715671,0.071254525846054,"Kerguelen",1,"F"
"ct109-186-14.ct109-186-14.3136","ct109-186-14",2015-02-26 17:27:56,17.5,51.102769393162,-62.4748771574368,0,-32.0783234662886,0.0738709052785558,"Kerguelen",1,"F"
"ct109-186-14.ct109-186-14.3137","ct109-186-14",2015-02-26 23:27:56,17.75,50.7405432653642,-62.6828063558635,0,-32.0017633193322,0.0765601469563171,"Kerguelen",1,"F"
"ct109-186-14.ct109-186-14.3138","ct109-186-14",2015-02-27 05:27:56,18,50.2589623511302,-62.8530135859858,0,-31.9224409779443,0.0793223413878941,"Kerguelen",1,"F"
"ct109-186-14.ct109-186-14.3139","ct109-186-14",2015-02-27 11:27:56,18.25,49.9277671218381,-63.0096243462065,0,-31.8402833756106,0.082157602333699,"Kerguelen",1.87625,"F"
"ct109-186-14.ct109-186-14.3140","ct109-186-14",2015-02-27 17:27:56,18.5,49.9204059599128,-63.0325077048692,0,-31.7552277952178,0.0850555803928565,"Kerguelen",1.83475,"F"
"ct109-186-14.ct109-186-14.3141","ct109-186-14",2015-02-27 23:27:56,18.75,49.9047856233713,-63.0642063163283,0,-31.6672786602001,0.0879491350176731,"Kerguelen",1.803,"F"
"ct109-186-14.ct109-186-14.3142","ct109-186-14",2015-02-28 05:27:56,19,49.9359745517765,-63.0807329740869,0,-31.5764700314863,0.0908086287137899,"Kerguelen",1.7705,"F"
"ct109-186-14.ct109-186-14.3143","ct109-186-14",2015-02-28 11:27:56,19.25,49.9005010776068,-63.1136866909775,0,-31.482846981739,0.0936230497472712,"Kerguelen",1.74125,"F"
"ct109-186-14.ct109-186-14.3144","ct109-186-14",2015-02-28 17:27:56,19.5,49.8453443925863,-63.0868559720351,0,-31.3864550879654,0.0963918937736785,"Kerguelen",1.67775,"F"
"ct109-186-14.ct109-186-14.3145","ct109-186-14",2015-02-28 23:27:56,19.75,49.8811410806663,-63.0276853566484,0,-31.2873402503058,0.0991148376595641,"Kerguelen",1.6185,"F"
"ct109-186-14.ct109-186-14.3146","ct109-186-14",2015-03-01 05:27:56,20,49.9504478190625,-63.0232902767997,0,-31.1855537456733,0.10178650463249,"Kerguelen",1.50525,"F"
"ct109-186-14.ct109-186-14.3147","ct109-186-14",2015-03-01 11:27:56,20.25,49.7589327974096,-63.0793241240361,0,-31.0811494846664,0.104404261006946,"Kerguelen",1.002,"F"
"ct109-186-14.ct109-186-14.3148","ct109-186-14",2015-03-01 17:27:56,20.5,49.5178738013148,-63.2160693022469,0,-30.9741810339907,0.106968450675721,"Kerguelen",1,"F"
"ct109-186-14.ct109-186-14.3149","ct109-186-14",2015-03-01 23:27:56,20.75,49.3958959935472,-63.3385408397847,0,-30.8647015778258,0.109479456164813,"Kerguelen",1,"F"
"ct109-186-14.ct109-186-14.3150","ct109-186-14",2015-03-02 05:27:56,21,49.2640973730956,-63.4483857165313,0,-30.752763906454,0.111937671371881,"Kerguelen",1,"F"
"ct109-186-14.ct109-186-14.3151","ct109-186-14",2015-03-02 11:27:56,21.25,48.8737310455871,-63.6458748049397,0,-30.6384204060088,0.114343500445158,"Kerguelen",1.913,"F"
"ct109-186-14.ct109-186-14.3152","ct109-186-14",2015-03-02 17:27:56,21.5,48.9117554883781,-63.7640653788453,0,-30.5217230493749,0.116697356633938,"Kerguelen",1.969,"F"
"ct109-186-14.ct109-186-14.3153","ct109-186-14",2015-03-02 23:27:56,21.75,48.9636283807709,-63.78396481196,0,-30.402728334424,0.118994714950899,"Kerguelen",1.976,"F"
"ct109-186-14.ct109-186-14.3154","ct109-186-14",2015-03-03 05:27:56,22,49.1178459328159,-63.8303443864814,0,-30.281521322196,0.121207012227942,"Kerguelen",1.9965,"F"
"ct109-186-14.ct109-186-14.3155","ct109-186-14",2015-03-03 11:27:56,22.25,49.0252497778262,-63.7448899660334,0,-30.1581971969917,0.123324125204294,"Kerguelen",1.996,"F"
"ct109-186-14.ct109-186-14.3156","ct109-186-14",2015-03-03 17:27:56,22.5,49.0789416510054,-63.7946297985486,0,-30.0328507717222,0.125346425269557,"Kerguelen",1.9685,"F"
"ct109-186-14.ct109-186-14.3157","ct109-186-14",2015-03-03 23:27:56,22.75,48.9223337770321,-63.9254774034026,0,-29.9055765661483,0.127274205573874,"Kerguelen",1.96525,"F"
"ct109-186-14.ct109-186-14.3158","ct109-186-14",2015-03-04 05:27:56,23,48.6028035305941,-63.9521581044286,0,-29.7764787307833,0.129097835365027,"Kerguelen",1.9945,"F"
"ct109-186-14.ct109-186-14.3159","ct109-186-14",2015-03-04 11:27:56,23.25,48.5559364898192,-63.9366615018168,0,-29.6456808038551,0.130797926928133,"Kerguelen",1.9965,"F"
"ct109-186-14.ct109-186-14.3160","ct109-186-14",2015-03-04 17:27:56,23.5,48.6112315177256,-63.9668736627948,0,-29.5133083741534,0.132372429701688,"Kerguelen",1.9955,"F"
"ct109-186-14.ct109-186-14.3161","ct109-186-14",2015-03-04 23:27:56,23.75,48.6236367275032,-63.992757094806,0,-29.379483799043,0.133824575110458,"Kerguelen",1.9955,"F"
"ct109-186-14.ct109-186-14.3162","ct109-186-14",2015-03-05 05:27:56,24,48.6183426100833,-64.0353219335782,0,-29.2443118808455,0.135171918197508,"Kerguelen",1.9985,"F"
"ct109-186-14.ct109-186-14.3163","ct109-186-14",2015-03-05 11:27:56,24.25,48.3864344218778,-63.9370318057789,0,-29.1078673721442,0.136444508701289,"Kerguelen",2,"F"
"ct109-186-14.ct109-186-14.3164","ct109-186-14",2015-03-05 17:27:56,24.5,48.3954123326062,-63.9158788689067,0,-28.970224850915,0.137642521229164,"Kerguelen",1.99975,"F"
"ct109-186-14.ct109-186-14.3165","ct109-186-14",2015-03-05 23:27:56,24.75,48.5076263742157,-63.9279889506218,0,-28.8314589434338,0.138765907481198,"Kerguelen",1.99975,"F"
"ct109-186-14.ct109-186-14.3166","ct109-186-14",2015-03-06 05:27:56,25,48.3052476541296,-64.0067259960806,0,-28.6916405734552,0.139818369978595,"Kerguelen",1.99825,"F"
"ct109-186-14.ct109-186-14.3167","ct109-186-14",2015-03-06 11:27:56,25.25,48.15913575136,-63.984874065899,0,-28.5508219188316,0.140818654623642,"Kerguelen",1.99825,"F"
"ct109-186-14.ct109-186-14.3168","ct109-186-14",2015-03-06 17:27:56,25.5,48.1761061756977,-63.9014726588082,0,-28.4090489269881,0.141772991843453,"Kerguelen",1.99675,"F"
"ct109-186-14.ct109-186-14.3169","ct109-186-14",2015-03-06 23:27:56,25.75,48.1224342840411,-63.8664348159432,0,-28.2663673850244,0.142681541963763,"Kerguelen",1.99725,"F"
"ct109-186-14.ct109-186-14.3170","ct109-186-14",2015-03-07 05:27:56,26,48.1375417484077,-63.8811156391294,0,-28.1228229414621,0.143544443562255,"Kerguelen",1.9965,"F"
"ct109-186-14.ct109-186-14.3171","ct109-186-14",2015-03-07 11:27:56,26.25,48.3364055569345,-63.8393758469237,0,-27.9784611254675,0.144361815994665,"Kerguelen",1.99875,"F"
"ct109-186-14.ct109-186-14.3172","ct109-186-14",2015-03-07 17:27:56,26.5,48.2911611591561,-63.8400728061799,0,-27.833327366869,0.145133758598481,"Kerguelen",1.998,"F"
"ct109-186-14.ct109-186-14.3173","ct109-186-14",2015-03-07 23:27:56,26.75,48.3213195832729,-63.8606105190335,0,-27.6874661044707,0.145861262398295,"Kerguelen",1.99575,"F"
"ct109-186-14.ct109-186-14.3174","ct109-186-14",2015-03-08 05:27:56,27,48.3581503140235,-63.887935154424,0,-27.5409010482305,0.146565056240228,"Kerguelen",1.99475,"F"
"ct109-186-14.ct109-186-14.3175","ct109-186-14",2015-03-08 11:27:56,27.25,48.3936345943644,-63.9161222501807,0,-27.3936352671123,0.147265781118194,"Kerguelen",1.99475,"F"
"ct109-186-14.ct109-186-14.3176","ct109-186-14",2015-03-08 17:27:56,27.5,48.5471267950368,-63.9006902633218,0,-27.2456707219982,0.147964545114027,"Kerguelen",1.9965,"F"
"ct109-186-14.ct109-186-14.3177","ct109-186-14",2015-03-08 23:27:56,27.75,48.5228767150695,-63.9314184976948,0,-27.0970106444314,0.148660077566792,"Kerguelen",1.997,"F"
"ct109-186-14.ct109-186-14.3178","ct109-186-14",2015-03-09 05:27:56,28,48.5978533952355,-63.9464509251991,0,-26.947669199511,0.149341444920398,"Kerguelen",1.9965,"F"
"ct109-186-14.ct109-186-14.3179","ct109-186-14",2015-03-09 11:27:56,28.25,48.5247854805279,-63.8571368591481,0,-26.7976653964283,0.150003803082749,"Kerguelen",1.992,"F"
"ct109-186-14.ct109-186-14.3180","ct109-186-14",2015-03-09 17:27:56,28.5,48.5324594719161,-63.904761612794,0,-26.6470181330283,0.150647263400028,"Kerguelen",1.9205,"F"
"ct109-186-14.ct109-186-14.3181","ct109-186-14",2015-03-09 23:27:56,28.75,48.4369353550145,-63.947326102977,0,-26.4957462120909,0.151271920937374,"Kerguelen",1.87975,"F"
"ct109-186-14.ct109-186-14.3182","ct109-186-14",2015-03-10 05:27:56,29,48.4528444321883,-64.0159752248897,0,-26.3438784375827,0.151867774508219,"Kerguelen",1.84825,"F"
"ct109-186-14.ct109-186-14.3183","ct109-186-14",2015-03-10 11:27:56,29.25,48.0694005590762,-64.0515167626884,0,-26.1914681725992,0.152410264983477,"Kerguelen",1.813,"F"
"ct109-186-14.ct109-186-14.3184","ct109-186-14",2015-03-10 17:27:56,29.5,47.9579807788828,-64.0200291670655,0,-26.0385725952744,0.152895577324791,"Kerguelen",1.72175,"F"
"ct109-186-14.ct109-186-14.3185","ct109-186-14",2015-03-10 23:27:56,29.75,47.8780707673214,-64.0135684239051,0,-25.885251669687,0.153320925587375,"Kerguelen",1.6485,"F"
"ct109-186-14.ct109-186-14.3186","ct109-186-14",2015-03-11 05:27:56,30,47.6197781494278,-63.9767584426958,0,-25.731578392149,0.153673277538036,"Kerguelen",1.6445,"F"
"ct109-186-14.ct109-186-14.3187","ct109-186-14",2015-03-11 11:27:56,30.25,47.6390761463292,-63.9714285665111,0,-25.577630112897,0.153948279252014,"Kerguelen",1.366,"F"
"ct109-186-14.ct109-186-14.3188","ct109-186-14",2015-03-11 17:27:56,30.5,47.6137725246276,-64.0406649063251,0,-25.4234846717704,0.154145441126607,"Kerguelen",1.02275,"F"
"ct109-186-14.ct109-186-14.3189","ct109-186-14",2015-03-11 23:27:56,30.75,47.4469611376999,-64.1646519965036,0,-25.269220450655,0.154264221115363,"Kerguelen",1.0015,"F"
"ct109-186-14.ct109-186-14.3190","ct109-186-14",2015-03-12 05:27:56,31,47.2718807795261,-64.2502573626536,0,-25.1149196649483,0.154300785706696,"Kerguelen",1.00025,"F"
"ct109-186-14.ct109-186-14.3191","ct109-186-14",2015-03-12 11:27:56,31.25,46.9868743537036,-64.2957409910041,0,-24.9606865409251,0.154233124023248,"Kerguelen",1.00025,"F"
"ct109-186-14.ct109-186-14.3192","ct109-186-14",2015-03-12 17:27:56,31.5,46.7227021976573,-64.2774413526713,0,-24.8066348716743,0.154051669250813,"Kerguelen",1,"F"
"ct109-186-14.ct109-186-14.3193","ct109-186-14",2015-03-12 23:27:56,31.75,46.4173855226853,-64.2830664852243,0,-24.6528795597817,0.153755311892551,"Kerguelen",1.00025,"F"
"ct109-186-14.ct109-186-14.3194","ct109-186-14",2015-03-13 05:27:56,32,46.2100170138428,-64.3021253637694,0,-24.4995366712362,0.15334288854551,"Kerguelen",1,"F"
"ct109-186-14.ct109-186-14.3195","ct109-186-14",2015-03-13 11:27:56,32.25,45.8654363691338,-64.3095561480767,0,-24.3467235125197,0.152813158716536,"Kerguelen",1,"F"
"ct109-186-14.ct109-186-14.3196","ct109-186-14",2015-03-13 17:27:56,32.5,45.6060383902658,-64.2820815827105,0,-24.1945586330859,0.152164879433736,"Kerguelen",1.00025,"F"
"ct109-186-14.ct109-186-14.3197","ct109-186-14",2015-03-13 23:27:56,32.75,45.3856649917583,-64.2983270676356,0,-24.0431576674282,0.151400965657739,"Kerguelen",1.0035,"F"
"ct109-186-14.ct109-186-14.3198","ct109-186-14",2015-03-14 05:27:56,33,45.2116955458243,-64.3701727664387,0,-23.8926151610491,0.150542506379053,"Kerguelen",1.01775,"F"
"ct109-186-14.ct109-186-14.3199","ct109-186-14",2015-03-14 11:27:56,33.25,45.0240347965272,-64.4640824534083,0,-23.7430060268934,0.14960913415574,"Kerguelen",1.49525,"F"
"ct109-186-14.ct109-186-14.3200","ct109-186-14",2015-03-14 17:27:56,33.5,45.0114253886696,-64.4820838460584,0,-23.5944050349164,0.148600991976969,"Kerguelen",1.55475,"F"
"ct109-186-14.ct109-186-14.3201","ct109-186-14",2015-03-14 23:27:56,33.75,45.0009002037125,-64.4595926713982,0,-23.4468880543314,0.147516980585061,"Kerguelen",1.59675,"F"
"ct109-186-14.ct109-186-14.3202","ct109-186-14",2015-03-15 05:27:56,34,45.0207308821856,-64.4681586868628,0,-23.3005320914501,0.146355962881295,"Kerguelen",1.63,"F"
"ct109-186-14.ct109-186-14.3203","ct109-186-14",2015-03-15 11:27:56,34.25,45.052494405356,-64.3779929551321,0,-23.1554153256992,0.145116765750844,"Kerguelen",1.64475,"F"
"ct109-186-14.ct109-186-14.3204","ct109-186-14",2015-03-15 17:27:56,34.5,45.0078564965526,-64.3389947786293,0,-23.0116171435226,0.143798182176572,"Kerguelen",1.65825,"F"
"ct109-186-14.ct109-186-14.3205","ct109-186-14",2015-03-15 23:27:56,34.75,45.07762675544,-64.3413407070498,0,-22.8692122952752,0.142404848247474,"Kerguelen",1.6555,"F"
"ct109-186-14.ct109-186-14.3206","ct109-186-14",2015-03-16 05:27:56,35,45.0932435327451,-64.3365298411742,0,-22.7282360266403,0.140976268634846,"Kerguelen",1.6425,"F"
"ct109-186-14.ct109-186-14.3207","ct109-186-14",2015-03-16 11:27:56,35.25,45.0411528169906,-64.3222924314847,0,-22.5886999938074,0.139536032832913,"Kerguelen",1.62525,"F"
"ct109-186-14.ct109-186-14.3208","ct109-186-14",2015-03-16 17:27:56,35.5,45.1261124761034,-64.3077473849739,0,-22.4506156510664,0.138084342741016,"Kerguelen",1.58775,"F"
"ct109-186-14.ct109-186-14.3209","ct109-186-14",2015-03-16 23:27:56,35.75,45.1697094673331,-64.3284284821499,0,-22.3139949003019,0.13662075076446,"Kerguelen",1.5395,"F"
"ct109-186-14.ct109-186-14.3210","ct109-186-14",2015-03-17 05:27:56,36,45.0350449702228,-64.3598279191676,0,-22.1788500880932,0.135144812208743,"Kerguelen",1.46975,"F"
"ct109-186-14.ct109-186-14.3211","ct109-186-14",2015-03-17 11:27:56,36.25,44.8897756078637,-64.3762955660005,0,-22.045194002515,0.133656085578218,"Kerguelen",1.402,"F"
"ct109-186-14.ct109-186-14.3212","ct109-186-14",2015-03-17 17:27:56,36.5,44.8385820646418,-64.3088219490931,0,-21.9130398696257,0.132154132889239,"Kerguelen",1.2585,"F"
"ct109-186-14.ct109-186-14.3213","ct109-186-14",2015-03-17 23:27:56,36.75,44.748712573096,-64.2814681207306,0,-21.7824013495954,0.130638520030341,"Kerguelen",1.11375,"F"
"ct109-186-14.ct109-186-14.3214","ct109-186-14",2015-03-18 05:27:56,37,44.6043319735164,-64.2998783005415,0,-21.6532928814759,0.129108468119493,"Kerguelen",1.02075,"F"
"ct109-186-14.ct109-186-14.3215","ct109-186-14",2015-03-18 11:27:56,37.25,44.4128109674843,-64.3561251152012,0,-21.5257322546378,0.12756062683815,"Kerguelen",1,"F"
"ct109-186-14.ct109-186-14.3216","ct109-186-14",2015-03-18 17:27:56,37.5,43.9941831882497,-64.4659122988303,0,-21.3997391762326,0.125993078405193,"Kerguelen",1,"F"
"ct109-186-14.ct109-186-14.3217","ct109-186-14",2015-03-18 23:27:56,37.75,43.5465351915128,-64.5747012420739,0,-21.2753338388856,0.124405337346958,"Kerguelen",1,"F"
"ct109-186-14.ct109-186-14.3218","ct109-186-14",2015-03-19 05:27:56,38,43.2168901078545,-64.6896494503797,0,-21.1525369050267,0.122796933858865,"Kerguelen",1,"F"
"ct109-186-14.ct109-186-14.3219","ct109-186-14",2015-03-19 11:27:56,38.25,43.0112816253036,-64.8424401434332,0,-21.0313695009757,0.121167404051045,"Kerguelen",1,"F"
"ct109-186-14.ct109-186-14.3220","ct109-186-14",2015-03-19 17:27:56,38.5,42.9672207756526,-64.9677197100699,0,-20.9118532102688,0.119516290706911,"Kerguelen",1,"F"
"ct109-186-14.ct109-186-14.3221","ct109-186-14",2015-03-19 23:27:56,38.75,42.9709248682209,-65.0634062474329,0,-20.7940092591008,0.117843951168026,"Kerguelen",1,"F"
"ct109-186-14.ct109-186-14.3222","ct109-186-14",2015-03-20 05:27:56,39,42.8495422591899,-65.1913949777178,0,-20.6778536611128,0.116155597987985,"Kerguelen",1.0015,"F"
"ct109-186-14.ct109-186-14.3223","ct109-186-14",2015-03-20 11:27:56,39.25,42.8246149012643,-65.2943176898434,0,-20.5634003700591,0.114453291053696,"Kerguelen",1.002,"F"
"ct109-186-14.ct109-186-14.3224","ct109-186-14",2015-03-20 17:27:56,39.5,42.6806172530064,-65.347545168967,0,-20.4506636397307,0.112736730328333,"Kerguelen",1.00225,"F"
"ct109-186-14.ct109-186-14.3225","ct109-186-14",2015-03-20 23:27:56,39.75,42.6552931040098,-65.3844179776417,0,-20.3396580214987,0.111005618232071,"Kerguelen",1.001,"F"
"ct109-186-14.ct109-186-14.3226","ct109-186-14",2015-03-21 05:27:56,40,42.5680865956514,-65.4638168857618,0,-20.2303983524723,0.109259669026412,"Kerguelen",1,"F"
"ct109-186-14.ct109-186-14.3227","ct109-186-14",2015-03-21 11:27:56,40.25,42.3234399231794,-65.5272096338917,0,-20.1228997430737,0.107498609398579,"Kerguelen",1,"F"
"ct109-186-14.ct109-186-14.3228","ct109-186-14",2015-03-21 17:27:56,40.5,42.0123064535213,-65.5673089673154,0,-20.0171775639918,0.105722179081891,"Kerguelen",1,"F"
"ct109-186-14.ct109-186-14.3229","ct109-186-14",2015-03-21 23:27:56,40.75,41.7273417292793,-65.6544090742648,0,-19.9132474325206,0.103930131471153,"Kerguelen",1,"F"
"ct109-186-14.ct109-186-14.3230","ct109-186-14",2015-03-22 05:27:56,41,41.4630703100287,-65.7435147781057,0,-19.8111251982504,0.10212223427026,"Kerguelen",1,"F"
"ct109-186-14.ct109-186-14.3231","ct109-186-14",2015-03-22 11:27:56,41.25,41.0278500718964,-65.8463989481998,0,-19.7108269281159,0.100298270134463,"Kerguelen",1,"F"
"ct109-186-14.ct109-186-14.3232","ct109-186-14",2015-03-22 17:27:56,41.5,40.6243579386018,-65.9690329165898,0,-19.6123688907863,0.0984580373295879,"Kerguelen",1,"F"
"ct109-186-14.ct109-186-14.3233","ct109-186-14",2015-03-22 23:27:56,41.75,40.4156915881962,-66.1242325926181,0,-19.5157675403833,0.0966013504030111,"Kerguelen",1.0005,"F"
"ct109-186-14.ct109-186-14.3234","ct109-186-14",2015-03-23 05:27:56,42,40.2563556016211,-66.2083550783625,0,-19.42103949954,0.094728040843306,"Kerguelen",1.00025,"F"
"ct109-186-14.ct109-186-14.3235","ct109-186-14",2015-03-23 11:27:56,42.25,40.2228192464829,-66.3757285679459,0,-19.3282015417783,0.0928379577616989,"Kerguelen",1,"F"
"ct109-186-14.ct109-186-14.3236","ct109-186-14",2015-03-23 17:27:56,42.5,39.9127380738267,-66.4875947580096,0,-19.2372705700876,0.0909309716907475,"Kerguelen",1,"F"
"ct109-186-14.ct109-186-14.3237","ct109-186-14",2015-03-23 23:27:56,42.75,39.6549087687372,-66.5742427309867,0,-19.1482569517279,0.0890136183596263,"Kerguelen",1.031,"F"
"ct109-186-14.ct109-186-14.3238","ct109-186-14",2015-03-24 05:27:56,43,39.5652616406594,-66.5907320561627,0,-19.0611692886737,0.0870876630542639,"Kerguelen",1.03375,"F"
"ct109-186-14.ct109-186-14.3239","ct109-186-14",2015-03-24 11:27:56,43.25,39.5182353767114,-66.5971955201123,0,-18.9760294133889,0.0851398752847843,"Kerguelen",1.035,"F"
"ct109-186-14.ct109-186-14.3240","ct109-186-14",2015-03-24 17:27:56,43.5,39.3870614937624,-66.6307022136437,0,-18.892859706561,0.083169706827893,"Kerguelen",1.0435,"F"
"ct109-186-14.ct109-186-14.3241","ct109-186-14",2015-03-24 23:27:56,43.75,39.3565745403661,-66.6592546666103,0,-18.8116828038683,0.0811769026926673,"Kerguelen",1.0465,"F"
"ct109-186-14.ct109-186-14.3242","ct109-186-14",2015-03-25 05:27:56,44,39.37826335166,-66.69580952843,0,-18.7325262813631,0.0791565225052165,"Kerguelen",1.0485,"F"
"ct109-186-14.ct109-186-14.3243","ct109-186-14",2015-03-25 11:27:56,44.25,39.3693426864539,-66.6816204333297,0,-18.6554234069233,0.0771028744398106,"Kerguelen",1.04275,"F"
"ct109-186-14.ct109-186-14.3244","ct109-186-14",2015-03-25 17:27:56,44.5,39.3804236604743,-66.7091840347096,0,-18.5804078853193,0.0750155216040327,"Kerguelen",1.03275,"F"
"ct109-186-14.ct109-186-14.3245","ct109-186-14",2015-03-25 23:27:56,44.75,39.3403895886685,-66.7450165721387,0,-18.5075135223491,0.0728943629701329,"Kerguelen",1.0215,"F"
"ct109-186-14.ct109-186-14.3246","ct109-186-14",2015-03-26 05:27:56,45,39.2042775088819,-66.8269947376647,0,-18.4367741920104,0.0707393303387427,"Kerguelen",1.0215,"F"
"ct109-186-14.ct109-186-14.3247","ct109-186-14",2015-03-26 11:27:56,45.25,38.9790817314318,-66.9405075970182,0,-18.3682238022576,0.0685503897527917,"Kerguelen",1.175,"F"
"ct109-186-14.ct109-186-14.3248","ct109-186-14",2015-03-26 17:27:56,45.5,38.8945989451731,-66.9522206708077,0,-18.3018971586875,0.0663266435700971,"Kerguelen",1.15225,"F"
"ct109-186-14.ct109-186-14.3249","ct109-186-14",2015-03-26 23:27:56,45.75,38.7385726339674,-66.9176774199388,0,-18.2378330240684,0.0640641346191018,"Kerguelen",1.13575,"F"
"ct109-186-14.ct109-186-14.3250","ct109-186-14",2015-03-27 05:27:56,46,38.5912071296034,-66.9433380241616,0,-18.1760712331601,0.0617617909082963,"Kerguelen",1.1235,"F"
"ct109-186-14.ct109-186-14.3251","ct109-186-14",2015-03-27 11:27:56,46.25,38.5352998546743,-66.9718118333285,0,-18.116651522513,0.0594197106471073,"Kerguelen",1.10575,"F"
"ct109-186-14.ct109-186-14.3252","ct109-186-14",2015-03-27 17:27:56,46.5,38.5747220797864,-66.9749853276552,0,-18.0596100133719,0.0570415091411008,"Kerguelen",1.071,"F"
"ct109-186-14.ct109-186-14.3253","ct109-186-14",2015-03-27 23:27:56,46.75,38.5250640059841,-66.9763535763362,0,-18.0049759146256,0.0546340987463312,"Kerguelen",1.031,"F"
"ct109-186-14.ct109-186-14.3254","ct109-186-14",2015-03-28 05:27:56,47,38.33290070144,-66.8929004314423,0,-17.9527722757054,0.0522036389201674,"Kerguelen",1.00375,"F"
"ct109-186-14.ct109-186-14.3255","ct109-186-14",2015-03-28 11:27:56,47.25,38.0407633621638,-66.8559248056239,0,-17.9030152653401,0.0497570103652645,"Kerguelen",1.003,"F"
"ct109-186-14.ct109-186-14.3256","ct109-186-14",2015-03-28 17:27:56,47.5,37.8466484590702,-66.9154841191701,0,-17.8557201836349,0.0472950817052037,"Kerguelen",1.00025,"F"
"ct109-186-14.ct109-186-14.3257","ct109-186-14",2015-03-28 23:27:56,47.75,37.7032594729525,-66.9801676648858,0,-17.8109018461452,0.0448183374897493,"Kerguelen",1,"F"
"ct109-186-14.ct109-186-14.3258","ct109-186-14",2015-03-29 05:27:56,48,37.6248193972168,-67.0716222668777,0,-17.7685745543115,0.0423272918337214,"Kerguelen",1.00175,"F"
"ct109-186-14.ct109-186-14.3259","ct109-186-14",2015-03-29 11:27:56,48.25,37.6287703820418,-67.170796598263,0,-17.728752066597,0.039822487714411,"Kerguelen",1.0025,"F"
"ct109-186-14.ct109-186-14.3260","ct109-186-14",2015-03-29 17:27:56,48.5,37.6053694799687,-67.2644712392685,0,-17.6914450110541,0.0373070555429011,"Kerguelen",1.00925,"F"
"ct109-186-14.ct109-186-14.3261","ct109-186-14",2015-03-29 23:27:56,48.75,37.5210058446301,-67.2637663079866,0,-17.6566507279929,0.0347942830612458,"Kerguelen",1.003,"F"
"ct109-186-14.ct109-186-14.3262","ct109-186-14",2015-03-30 05:27:56,49,37.3622195229247,-67.3089447992612,0,-17.6243619410323,0.0322887869606187,"Kerguelen",1,"F"
"ct109-186-14.ct109-186-14.3263","ct109-186-14",2015-03-30 11:27:56,49.25,36.9485546312773,-67.5075864975827,0,-17.5945706437141,0.0297912973181408,"Kerguelen",1,"F"
"ct109-186-14.ct109-186-14.3264","ct109-186-14",2015-03-30 17:27:56,49.5,36.5685534063759,-67.6606573263165,0,-17.5672680952433,0.0273025484708422,"Kerguelen",1,"F"
"ct109-186-14.ct109-186-14.3265","ct109-186-14",2015-03-30 23:27:56,49.75,36.1842901225741,-67.8096637756964,0,-17.5424448168538,0.0248232783895325,"Kerguelen",1,"F"
"ct109-186-14.ct109-186-14.3266","ct109-186-14",2015-03-31 05:27:56,50,35.8319410742015,-67.9635151269021,0,-17.5200905899503,0.0223542269034593,"Kerguelen",1,"F"
"ct109-186-14.ct109-186-14.3267","ct109-186-14",2015-03-31 11:27:56,50.25,35.6208056102738,-68.1318194807006,0,-17.5001944560138,0.0198961339365311,"Kerguelen",1,"F"
"ct109-186-14.ct109-186-14.3268","ct109-186-14",2015-03-31 17:27:56,50.5,35.3145509925523,-68.2413209243734,0,-17.4827447182599,0.0174497377539024,"Kerguelen",1,"F"
"ct109-186-14.ct109-186-14.3269","ct109-186-14",2015-03-31 23:27:56,50.75,35.2103672697345,-68.3827182289216,0,-17.4677289450521,0.015015773207816,"Kerguelen",1.00025,"F"
"ct109-186-14.ct109-186-14.3270","ct109-186-14",2015-04-01 05:27:56,51,34.8559879121033,-68.4189817693486,0,-17.4551339750239,0.0125949700282096,"Kerguelen",1,"F"
"ct109-186-14.ct109-186-14.3271","ct109-186-14",2015-04-01 11:27:56,51.25,34.3723303794696,-68.4042489726055,0,-17.4449459239065,0.0101880511173408,"Kerguelen",1,"F"
"ct109-186-14.ct109-186-14.3272","ct109-186-14",2015-04-01 17:27:56,51.5,33.86105682803,-68.4091016139887,0,-17.4371501946117,0.00779572929477113,"Kerguelen",1.00025,"F"
"ct109-186-14.ct109-186-14.3273","ct109-186-14",2015-04-01 23:27:56,51.75,33.5447720054461,-68.25316228982,0,-17.4317315388176,0.00541865579416767,"Kerguelen",1,"F"
"ct109-186-14.ct109-186-14.3274","ct109-186-14",2015-04-02 05:27:56,52,33.2091173459429,-68.055303965774,0,-17.428674079394,0.00305745942356384,"Kerguelen",1.00025,"F"
"ct109-186-14.ct109-186-14.3275","ct109-186-14",2015-04-02 11:27:56,52.25,33.0525744443888,-67.9438887380374,0,-17.4279612634207,0.000712815973299974,"Kerguelen",1.0005,"F"
"ct109-186-14.ct109-186-14.3276","ct109-186-14",2015-04-02 17:27:56,52.5,32.8262218871069,-67.8975499681253,0,-17.4295758513559,-0.00161458793522806,"Kerguelen",1,"F"
"ct109-186-14.ct109-186-14.3277","ct109-186-14",2015-04-02 23:27:56,52.75,32.6172400006546,-67.8743399010745,0,-17.4334976528345,-0.00392180147858467,"Kerguelen",1.0005,"F"
"ct109-186-14.ct109-186-14.3278","ct109-186-14",2015-04-03 05:27:56,53,32.4485140969002,-67.8883862589959,0,-17.4397015325458,-0.00620387971130842,"Kerguelen",1.00075,"F"
"ct109-186-14.ct109-186-14.3279","ct109-186-14",2015-04-03 11:27:56,53.25,32.351644900134,-67.9827706911335,0,-17.4481612768517,-0.00845974430586371,"Kerguelen",1,"F"
"ct109-186-14.ct109-186-14.3280","ct109-186-14",2015-04-03 17:27:56,53.5,32.0350207677591,-68.0649213617262,0,-17.4588500947806,-0.0106888179289361,"Kerguelen",1,"F"
"ct109-186-14.ct109-186-14.3281","ct109-186-14",2015-04-03 23:27:56,53.75,31.5640864830635,-68.1450431956399,0,-17.4717406446821,-0.012890549901487,"Kerguelen",1,"F"
"ct109-186-14.ct109-186-14.3282","ct109-186-14",2015-04-04 05:27:56,54,31.1637068699848,-68.2957582171547,0,-17.4868050616141,-0.0150644169320091,"Kerguelen",1,"F"
"ct109-186-14.ct109-186-14.3283","ct109-186-14",2015-04-04 11:27:56,54.25,30.7310820943803,-68.452104436152,0,-17.5040149853638,-0.0172099237496615,"Kerguelen",1.00175,"F"
"ct109-186-14.ct109-186-14.3284","ct109-186-14",2015-04-04 17:27:56,54.5,30.4715345963846,-68.4829777623517,0,-17.5233415889848,-0.0193266036210088,"Kerguelen",1.0005,"F"
"ct109-186-14.ct109-186-14.3285","ct109-186-14",2015-04-04 23:27:56,54.75,30.2303290440225,-68.5471209504176,0,-17.5447551298185,-0.0214135408337451,"Kerguelen",1,"F"
"ct109-186-14.ct109-186-14.3286","ct109-186-14",2015-04-05 05:27:56,55,29.9831645608067,-68.6306121577823,0,-17.568212533791,-0.0234574039724267,"Kerguelen",1,"F"
"ct109-186-14.ct109-186-14.3287","ct109-186-14",2015-04-05 11:27:56,55.25,29.6484613597952,-68.7594616891504,0,-17.593656309766,-0.0254437759750203,"Kerguelen",1,"F"
"ct109-186-14.ct109-186-14.3288","ct109-186-14",2015-04-05 17:27:56,55.5,29.2668547317682,-68.8476152192297,0,-17.6210279764771,-0.0273716667111179,"Kerguelen",1,"F"
"ct109-186-14.ct109-186-14.3289","ct109-186-14",2015-04-05 23:27:56,55.75,28.8543370090449,-68.9436902011838,0,-17.6502607562863,-0.0292327798091935,"Kerguelen",1,"F"
"ct109-186-14.ct109-186-14.3290","ct109-186-14",2015-04-06 05:27:56,56,28.4752745208706,-69.0076612340889,0,-17.6812709367263,-0.031010180439961,"Kerguelen",1,"F"
"ct109-186-14.ct109-186-14.3291","ct109-186-14",2015-04-06 11:27:56,56.25,28.1207244931146,-69.0899591336019,0,-17.713972760633,-0.0327018239066917,"Kerguelen",1.00125,"F"
"ct109-186-14.ct109-186-14.3292","ct109-186-14",2015-04-06 17:27:56,56.5,27.9093118394926,-69.1161302582956,0,-17.7482805897108,-0.0343078290778925,"Kerguelen",1.0025,"F"
"ct109-186-14.ct109-186-14.3293","ct109-186-14",2015-04-06 23:27:56,56.75,27.7860417718393,-69.1280210989656,0,-17.78410895969,-0.0358283699791434,"Kerguelen",1.006,"F"
"ct109-186-14.ct109-186-14.3294","ct109-186-14",2015-04-07 05:27:56,57,27.6107764382262,-69.1392425390484,0,-17.8213726314972,-0.0372636718072222,"Kerguelen",1.02075,"F"
"ct109-186-14.ct109-186-14.3295","ct109-186-14",2015-04-07 11:27:56,57.25,27.4346552555566,-69.1367523556525,0,-17.8599866384213,-0.0386140069240759,"Kerguelen",1.03,"F"
"ct109-186-14.ct109-186-14.3296","ct109-186-14",2015-04-07 17:27:56,57.5,27.2852322250102,-69.1152918872009,0,-17.8998663293021,-0.0398796908808036,"Kerguelen",1.05375,"F"
"ct109-186-14.ct109-186-14.3297","ct109-186-14",2015-04-07 23:27:56,57.75,27.4534594615175,-68.9962925341467,0,-17.940927407757,-0.0410610784549126,"Kerguelen",1.0415,"F"
"ct109-186-14.ct109-186-14.3298","ct109-186-14",2015-04-08 05:27:56,58,27.4903722035909,-68.9226477958763,0,-17.983085967517,-0.0421585597599666,"Kerguelen",1.0245,"F"
"ct109-186-14.ct109-186-14.3299","ct109-186-14",2015-04-08 11:27:56,58.25,27.4372013526051,-68.8722682662125,0,-18.0262585239361,-0.0431725564191687,"Kerguelen",1.01175,"F"
"ct109-186-14.ct109-186-14.3300","ct109-186-14",2015-04-08 17:27:56,58.5,27.2836478808074,-68.8165849423414,0,-18.0703620417578,-0.0441035178216864,"Kerguelen",1.0085,"F"
"ct109-186-14.ct109-186-14.3301","ct109-186-14",2015-04-08 23:27:56,58.75,27.0741215110422,-68.7354631072085,0,-18.1153139592542,-0.0449519174963969,"Kerguelen",1.0155,"F"
"ct109-186-14.ct109-186-14.3302","ct109-186-14",2015-04-09 05:27:56,59,26.9978612949283,-68.6841171043826,0,-18.1610322088318,-0.0457182495775921,"Kerguelen",1.0215,"F"
"ct109-186-14.ct109-186-14.3303","ct109-186-14",2015-04-09 11:27:56,59.25,26.8853000034883,-68.61927857885,0,-18.207435234242,-0.046403025410155,"Kerguelen",1.04075,"F"
"ct109-186-14.ct109-186-14.3304","ct109-186-14",2015-04-09 17:27:56,59.5,26.9945561085136,-68.629119355589,0,-18.2544420045195,-0.0470067702775301,"Kerguelen",1.027,"F"
"ct109-186-14.ct109-186-14.3305","ct109-186-14",2015-04-09 23:27:56,59.75,27.1820268485427,-68.6496611979983,0,-18.3019720247776,-0.0475300202581103,"Kerguelen",1.02525,"F"
"ct109-186-14.ct109-186-14.3306","ct109-186-14",2015-04-10 05:27:56,60,27.2202462774529,-68.6468503231563,0,-18.3499453440144,-0.0479733192368381,"Kerguelen",1.017,"F"
"ct109-187-14.ct109-187-14.3349","ct109-187-14",2015-02-04 06:30:05,0.25,71.7991244414817,-50.1321180963267,0,-34.651132839313,0.131439462657462,"Kerguelen",1.00175,"F"
"ct109-187-14.ct109-187-14.3350","ct109-187-14",2015-02-04 12:30:05,0.5,71.994115505691,-50.1872348214898,0,-34.5198450486494,0.131287790663653,"Kerguelen",1,"F"
"ct109-187-14.ct109-187-14.3351","ct109-187-14",2015-02-04 18:30:05,0.75,72.4292016578138,-50.3319180868628,0,-34.3887182001497,0.131126848499719,"Kerguelen",1,"F"
"ct109-187-14.ct109-187-14.3352","ct109-187-14",2015-02-05 00:30:05,1,72.760014479248,-50.4552574812763,0,-34.257761531721,0.130956668428656,"Kerguelen",1,"F"
"ct109-187-14.ct109-187-14.3353","ct109-187-14",2015-02-05 06:30:05,1.25,73.0635804089332,-50.5824010203207,0,-34.1269842528499,0.130777278871141,"Kerguelen",1,"F"
"ct109-187-14.ct109-187-14.3354","ct109-187-14",2015-02-05 12:30:05,1.5,73.3863933204433,-50.7683973232824,0,-33.9963955484091,0.130588704440759,"Kerguelen",1,"F"
"ct109-187-14.ct109-187-14.3355","ct109-187-14",2015-02-05 18:30:05,1.75,73.6756900350052,-50.8991482913406,0,-33.8660045824661,0.130390965943022,"Kerguelen",1,"F"
"ct109-187-14.ct109-187-14.3356","ct109-187-14",2015-02-06 00:30:05,2,74.0319939098879,-51.0667275041389,0,-33.7358205020552,0.130184080410922,"Kerguelen",1,"F"
"ct109-187-14.ct109-187-14.3357","ct109-187-14",2015-02-06 06:30:05,2.25,74.3284053580932,-51.1959803796529,0,-33.6058524337537,0.129968068301461,"Kerguelen",1.00025,"F"
"ct109-187-14.ct109-187-14.3358","ct109-187-14",2015-02-06 12:30:05,2.5,74.495152086361,-51.3063900378714,0,-33.4761078610303,0.129744572723378,"Kerguelen",1,"F"
"ct109-187-14.ct109-187-14.3359","ct109-187-14",2015-02-06 18:30:05,2.75,74.7554117319432,-51.5252630089819,0,-33.3465915232267,0.129516337803648,"Kerguelen",1,"F"
"ct109-187-14.ct109-187-14.3360","ct109-187-14",2015-02-07 00:30:05,3,75.1636015452602,-51.7050226872578,0,-33.2173145799931,0.129276943233603,"Kerguelen",1.00025,"F"
"ct109-187-14.ct109-187-14.3361","ct109-187-14",2015-02-07 06:30:05,3.25,75.382375645744,-51.812038122911,0,-33.0882912363455,0.129023343647539,"Kerguelen",1,"F"
"ct109-187-14.ct109-187-14.3362","ct109-187-14",2015-02-07 12:30:05,3.5,75.534071811543,-51.9326493924436,0,-32.9595357036899,0.128755532655611,"Kerguelen",1,"F"
"ct109-187-14.ct109-187-14.3363","ct109-187-14",2015-02-07 18:30:05,3.75,75.8921160100156,-52.1073006933014,0,-32.8310621919289,0.12847351176104,"Kerguelen",1,"F"
"ct109-187-14.ct109-187-14.3364","ct109-187-14",2015-02-08 00:30:05,4,76.1463413465876,-52.2554404361833,0,-32.7028849148959,0.12817727703297,"Kerguelen",1.00075,"F"
"ct109-187-14.ct109-187-14.3365","ct109-187-14",2015-02-08 06:30:05,4.25,76.325756998161,-52.3537676591302,0,-32.5750180957777,0.127866819118255,"Kerguelen",1,"F"
"ct109-187-14.ct109-187-14.3366","ct109-187-14",2015-02-08 12:30:05,4.5,76.4865692982496,-52.4708334548198,0,-32.4474759724874,0.127542123290275,"Kerguelen",1,"F"
"ct109-187-14.ct109-187-14.3367","ct109-187-14",2015-02-08 18:30:05,4.75,76.6713892440493,-52.6532369134907,0,-32.3202728030233,0.127203169464069,"Kerguelen",1,"F"
"ct109-187-14.ct109-187-14.3368","ct109-187-14",2015-02-09 00:30:05,5,76.9625421688784,-52.8269609274589,0,-32.1934228707743,0.126849932248962,"Kerguelen",1,"F"
"ct109-187-14.ct109-187-14.3369","ct109-187-14",2015-02-09 06:30:05,5.25,77.3669232752913,-53.0162895193097,0,-32.0669404898075,0.126482380966864,"Kerguelen",1,"F"
"ct109-187-14.ct109-187-14.3370","ct109-187-14",2015-02-09 12:30:05,5.5,77.7185564367218,-53.2467844327624,0,-31.9408400100986,0.126100479708924,"Kerguelen",1,"F"
"ct109-187-14.ct109-187-14.3371","ct109-187-14",2015-02-09 18:30:05,5.75,78.0370389142173,-53.492254514565,0,-31.8151358227408,0.125704187357728,"Kerguelen",1,"F"
"ct109-187-14.ct109-187-14.3372","ct109-187-14",2015-02-10 00:30:05,6,78.2231101552792,-53.6611202739386,0,-31.689842365093,0.125293457647818,"Kerguelen",1,"F"
"ct109-187-14.ct109-187-14.3373","ct109-187-14",2015-02-10 06:30:05,6.25,78.4414697125922,-53.832930892361,0,-31.5649741259008,0.124868239192177,"Kerguelen",1,"F"
"ct109-187-14.ct109-187-14.3374","ct109-187-14",2015-02-10 12:30:05,6.5,78.6110772431298,-53.9717509126075,0,-31.4405456503536,0.124428475547222,"Kerguelen",1,"F"
"ct109-187-14.ct109-187-14.3375","ct109-187-14",2015-02-10 18:30:05,6.75,78.8921764410281,-54.1128850879834,0,-31.3165715451099,0.12397410524369,"Kerguelen",1,"F"
"ct109-187-14.ct109-187-14.3376","ct109-187-14",2015-02-11 00:30:05,7,79.2552462104904,-54.190803231351,0,-31.1930664832532,0.123505061856699,"Kerguelen",1,"F"
"ct109-187-14.ct109-187-14.3377","ct109-187-14",2015-02-11 06:30:05,7.25,79.4985536684133,-54.323389367982,0,-31.0700452092121,0.123021274041146,"Kerguelen",1,"F"
"ct109-187-14.ct109-187-14.3378","ct109-187-14",2015-02-11 12:30:05,7.5,79.7575218815481,-54.5378475730442,0,-30.9475225436042,0.122522665607888,"Kerguelen",1,"F"
"ct109-187-14.ct109-187-14.3379","ct109-187-14",2015-02-11 18:30:05,7.75,80.0565650920407,-54.7552437961758,0,-30.8255133880401,0.122009155564101,"Kerguelen",1,"F"
"ct109-187-14.ct109-187-14.3380","ct109-187-14",2015-02-12 00:30:05,8,80.2634965082649,-54.8961878587669,0,-30.7040327298447,0.121480658195428,"Kerguelen",1,"F"
"ct109-187-14.ct109-187-14.3381","ct109-187-14",2015-02-12 06:30:05,8.25,80.3762312764309,-55.0053421598938,0,-30.5830956467324,0.120937083112305,"Kerguelen",1,"F"
"ct109-187-14.ct109-187-14.3382","ct109-187-14",2015-02-12 12:30:05,8.5,80.5400203560065,-55.1505415773225,0,-30.4627173113934,0.120378335338955,"Kerguelen",1,"F"
"ct109-187-14.ct109-187-14.3383","ct109-187-14",2015-02-12 18:30:05,8.75,80.6553220120269,-55.4105785039681,0,-30.3429129539954,0.11980435739799,"Kerguelen",1,"F"
"ct109-187-14.ct109-187-14.3384","ct109-187-14",2015-02-13 00:30:05,9,80.8291736784773,-55.6724820081251,0,-30.2236936535666,0.119219300428797,"Kerguelen",1,"F"
"ct109-187-14.ct109-187-14.3385","ct109-187-14",2015-02-13 06:30:05,9.25,81.0374571479561,-55.8906592000028,0,-30.1050627416146,0.118630911951995,"Kerguelen",1,"F"
"ct109-187-14.ct109-187-14.3386","ct109-187-14",2015-02-13 12:30:05,9.5,81.2078640394357,-56.0779468890637,0,-29.9870228025817,0.118039939032871,"Kerguelen",1,"F"
"ct109-187-14.ct109-187-14.3387","ct109-187-14",2015-02-13 18:30:05,9.75,81.3207078163853,-56.2836993014789,0,-29.8695765207497,0.117446281832034,"Kerguelen",1,"F"
"ct109-187-14.ct109-187-14.3388","ct109-187-14",2015-02-14 00:30:05,10,81.5060432362563,-56.4929713170143,0,-29.7527266805613,0.11684984018841,"Kerguelen",1,"F"
"ct109-187-14.ct109-187-14.3389","ct109-187-14",2015-02-14 06:30:05,10.25,81.8250244051218,-56.7304714361921,0,-29.6364761669464,0.116250513614868,"Kerguelen",1,"F"
"ct109-187-14.ct109-187-14.3390","ct109-187-14",2015-02-14 12:30:05,10.5,81.9771841220402,-56.9360200317517,0,-29.5208279656615,0.115648201284907,"Kerguelen",1,"F"
"ct109-187-14.ct109-187-14.3391","ct109-187-14",2015-02-14 18:30:05,10.75,82.1120644577437,-57.1420052528261,0,-29.4057851636136,0.115042802047899,"Kerguelen",1,"F"
"ct109-187-14.ct109-187-14.3392","ct109-187-14",2015-02-15 00:30:05,11,82.3532882402808,-57.3556000648779,0,-29.2913509492034,0.114434214410275,"Kerguelen",1,"F"
"ct109-187-14.ct109-187-14.3393","ct109-187-14",2015-02-15 06:30:05,11.25,82.4657352647079,-57.5868655741994,0,-29.1775286126492,0.113822336554142,"Kerguelen",1,"F"
"ct109-187-14.ct109-187-14.3394","ct109-187-14",2015-02-15 12:30:05,11.5,82.5055613348481,-57.765208377468,0,-29.0643215463287,0.113207066320548,"Kerguelen",1,"F"
"ct109-187-14.ct109-187-14.3395","ct109-187-14",2015-02-15 18:30:05,11.75,82.5564827692786,-57.9395522484276,0,-28.9517328923024,0.112588654026291,"Kerguelen",1,"F"
"ct109-187-14.ct109-187-14.3396","ct109-187-14",2015-02-16 00:30:05,12,82.6213754008267,-58.0864816620713,0,-28.8397617766475,0.11197111565488,"Kerguelen",1,"F"
"ct109-187-14.ct109-187-14.3397","ct109-187-14",2015-02-16 06:30:05,12.25,82.7492005551766,-58.2467477169719,0,-28.7284018781016,0.111359898545893,"Kerguelen",1,"F"
"ct109-187-14.ct109-187-14.3398","ct109-187-14",2015-02-16 12:30:05,12.5,82.9072417887709,-58.4226412111815,0,-28.6176453020955,0.110756576006049,"Kerguelen",1,"F"
"ct109-187-14.ct109-187-14.3399","ct109-187-14",2015-02-16 18:30:05,12.75,82.9628449711394,-58.5736547964252,0,-28.5074842164745,0.110161085621086,"Kerguelen",1.0025,"F"
"ct109-187-14.ct109-187-14.3400","ct109-187-14",2015-02-17 00:30:05,13,83.0898351830286,-58.659592621509,0,-28.3979108599047,0.10957335656977,"Kerguelen",1.0015,"F"
"ct109-187-14.ct109-187-14.3401","ct109-187-14",2015-02-17 06:30:05,13.25,83.1930959085163,-58.725192028462,0,-28.2889175392952,0.108993320609468,"Kerguelen",1.00175,"F"
"ct109-187-14.ct109-187-14.3402","ct109-187-14",2015-02-17 12:30:05,13.5,83.2872306956218,-58.8028737960339,0,-28.1804966272996,0.108420911995644,"Kerguelen",1.00275,"F"
"ct109-187-14.ct109-187-14.3403","ct109-187-14",2015-02-17 18:30:05,13.75,83.255364554003,-58.8474123763265,0,-28.0726405598554,0.10785606744419,"Kerguelen",1.00075,"F"
"ct109-187-14.ct109-187-14.3404","ct109-187-14",2015-02-18 00:30:05,14,83.2516381526354,-58.9231318235631,0,-27.9653418337994,0.107298726056027,"Kerguelen",1,"F"
"ct109-187-14.ct109-187-14.3405","ct109-187-14",2015-02-18 06:30:05,14.25,83.3290448344234,-59.0299497376454,0,-27.8585930045165,0.106748829282877,"Kerguelen",1,"F"
"ct109-187-14.ct109-187-14.3406","ct109-187-14",2015-02-18 12:30:05,14.5,83.4348049245129,-59.1786640447117,0,-27.7523866836608,0.106206320855656,"Kerguelen",1,"F"
"ct109-187-14.ct109-187-14.3407","ct109-187-14",2015-02-18 18:30:05,14.75,83.4529452212503,-59.3442950430162,0,-27.6467155369059,0.105671146754904,"Kerguelen",1,"F"
"ct109-187-14.ct109-187-14.3408","ct109-187-14",2015-02-19 00:30:05,15,83.616692588508,-59.5885219550873,0,-27.5415722817636,0.105143255142282,"Kerguelen",1,"F"
"ct109-187-14.ct109-187-14.3409","ct109-187-14",2015-02-19 06:30:05,15.25,83.7808755259222,-59.9032040894752,0,-27.4369496854294,0.104622596334286,"Kerguelen",1.98675,"F"
"ct109-187-14.ct109-187-14.3410","ct109-187-14",2015-02-19 12:30:05,15.5,83.7715293080812,-59.9316163890184,0,-27.3328405158716,0.104109169557748,"Kerguelen",1.33325,"F"
"ct109-187-14.ct109-187-14.3411","ct109-187-14",2015-02-19 18:30:05,15.75,83.8675143732566,-60.0136833817873,0,-27.229235934182,0.103604581689609,"Kerguelen",1.01325,"F"
"ct109-187-14.ct109-187-14.3412","ct109-187-14",2015-02-20 00:30:05,16,83.9884587251829,-60.1339688544149,0,-27.1261235303043,0.103112403877686,"Kerguelen",1,"F"
"ct109-187-14.ct109-187-14.3413","ct109-187-14",2015-02-20 06:30:05,16.25,84.2478124953306,-60.3325405889822,0,-27.023485068088,0.102638462216337,"Kerguelen",1,"F"
"ct109-187-14.ct109-187-14.3414","ct109-187-14",2015-02-20 12:30:05,16.5,84.4313887862393,-60.4527858224644,0,-26.9213009917998,0.102184076288231,"Kerguelen",1,"F"
"ct109-187-14.ct109-187-14.3415","ct109-187-14",2015-02-20 18:30:05,16.75,84.6314379726271,-60.5577683161773,0,-26.8195517323329,0.10174925946686,"Kerguelen",1,"F"
"ct109-187-14.ct109-187-14.3416","ct109-187-14",2015-02-21 00:30:05,17,84.8137628963868,-60.6294713554476,0,-26.7182176045094,0.101334127823538,"Kerguelen",1.00125,"F"
"ct109-187-14.ct109-187-14.3417","ct109-187-14",2015-02-21 06:30:05,17.25,85.1927134755493,-60.7688491673569,0,-26.6172750486554,0.100942555853939,"Kerguelen",1.993,"F"
"ct109-187-14.ct109-187-14.3418","ct109-187-14",2015-02-21 12:30:05,17.5,85.1665840546426,-60.7827426794678,0,-26.516695346546,0.100579702109388,"Kerguelen",1.997,"F"
"ct109-187-14.ct109-187-14.3419","ct109-187-14",2015-02-21 18:30:05,17.75,85.0275816330334,-60.8041932816776,0,-26.4164477803601,0.100247566185879,"Kerguelen",1.99875,"F"
"ct109-187-14.ct109-187-14.3420","ct109-187-14",2015-02-22 00:30:05,18,85.1023081086212,-60.7490417912535,0,-26.3165030471166,0.0999447332435843,"Kerguelen",1.99525,"F"
"ct109-187-14.ct109-187-14.3421","ct109-187-14",2015-02-22 06:30:05,18.25,85.0805239959399,-60.707009706106,0,-26.216839229516,0.0996638176005371,"Kerguelen",1.993,"F"
"ct109-187-14.ct109-187-14.3422","ct109-187-14",2015-02-22 12:30:05,18.5,85.0041582581059,-60.714077945118,0,-26.1174361543857,0.0994030751303165,"Kerguelen",1.9875,"F"
"ct109-187-14.ct109-187-14.3423","ct109-187-14",2015-02-22 18:30:05,18.75,85.067167341125,-60.7105472463088,0,-26.0182776509656,0.0991585034201381,"Kerguelen",1.97725,"F"
"ct109-187-14.ct109-187-14.3424","ct109-187-14",2015-02-23 00:30:05,19,85.0587865764889,-60.6624879847953,0,-25.9193491198317,0.0989285311339072,"Kerguelen",1.965,"F"
"ct109-187-14.ct109-187-14.3425","ct109-187-14",2015-02-23 06:30:05,19.25,84.894294029906,-60.5886880424509,0,-25.8206359274053,0.0987131924263474,"Kerguelen",1.96875,"F"
"ct109-187-14.ct109-187-14.3426","ct109-187-14",2015-02-23 12:30:05,19.5,85.0284694832483,-60.5672866525284,0,-25.7221233984757,0.098512528929573,"Kerguelen",1.93625,"F"
"ct109-187-14.ct109-187-14.3427","ct109-187-14",2015-02-23 18:30:05,19.75,85.151110438927,-60.5325356614363,0,-25.6237968127479,0.0983265857277982,"Kerguelen",1.92475,"F"
"ct109-187-14.ct109-187-14.3428","ct109-187-14",2015-02-24 00:30:05,20,85.1569928616887,-60.5127567858749,0,-25.5256414013791,0.0981554113688499,"Kerguelen",1.90825,"F"
"ct109-187-14.ct109-187-14.3429","ct109-187-14",2015-02-24 06:30:05,20.25,85.2017897482776,-60.4887817693347,0,-25.4276423434607,0.0979990579184131,"Kerguelen",1.889,"F"
"ct109-187-14.ct109-187-14.3430","ct109-187-14",2015-02-24 12:30:05,20.5,85.2451795298597,-60.4630957565624,0,-25.3297853607416,0.0978569827190634,"Kerguelen",1.8745,"F"
"ct109-187-14.ct109-187-14.3431","ct109-187-14",2015-02-24 18:30:05,20.75,85.2839352170548,-60.451921070802,0,-25.2320614374655,0.097723923276144,"Kerguelen",1.8635,"F"
"ct109-187-14.ct109-187-14.3432","ct109-187-14",2015-02-25 00:30:05,21,85.3589649388085,-60.4174514898561,0,-25.1344653589149,0.0975960785505325,"Kerguelen",1.85825,"F"
"ct109-187-14.ct109-187-14.3433","ct109-187-14",2015-02-25 06:30:05,21.25,85.3993903647804,-60.3805908086521,0,-25.0369920365322,0.0974733223827129,"Kerguelen",1.85825,"F"
"ct109-187-14.ct109-187-14.3434","ct109-187-14",2015-02-25 12:30:05,21.5,85.5075191519761,-60.3595250732828,0,-24.9396363699247,0.0973556666075709,"Kerguelen",1.86175,"F"
"ct109-187-14.ct109-187-14.3435","ct109-187-14",2015-02-25 18:30:05,21.75,85.5282175349317,-60.3615460526301,0,-24.8423932456967,0.0972431242279248,"Kerguelen",1.862,"F"
"ct109-187-14.ct109-187-14.3436","ct109-187-14",2015-02-26 00:30:05,22,85.5208786633029,-60.2889786636328,0,-24.7452575362894,0.0971357094073838,"Kerguelen",1.8585,"F"
"ct109-187-14.ct109-187-14.3437","ct109-187-14",2015-02-26 06:30:05,22.25,85.5542848291658,-60.2269209505961,0,-24.6482240983544,0.0970334379349291,"Kerguelen",1.86375,"F"
"ct109-187-14.ct109-187-14.3438","ct109-187-14",2015-02-26 12:30:05,22.5,85.617842854237,-60.18100772499,0,-24.5512871738692,0.0969369244851775,"Kerguelen",1.8845,"F"
"ct109-187-14.ct109-187-14.3439","ct109-187-14",2015-02-26 18:30:05,22.75,85.6478975224723,-60.160906279117,0,-24.4544386842292,0.0968484896400751,"Kerguelen",1.90925,"F"
"ct109-187-14.ct109-187-14.3440","ct109-187-14",2015-02-27 00:30:05,23,85.6530547796389,-60.1690677994651,0,-24.3576697389637,0.0967689452654352,"Kerguelen",1.92425,"F"
"ct109-187-14.ct109-187-14.3441","ct109-187-14",2015-02-27 06:30:05,23.25,85.6562127987957,-60.1768343053479,0,-24.2609713938739,0.0966983450897935,"Kerguelen",1.92875,"F"
"ct109-187-14.ct109-187-14.3442","ct109-187-14",2015-02-27 12:30:05,23.5,85.5727255890188,-60.2489744312062,0,-24.1643346583463,0.0966367355276582,"Kerguelen",1.9355,"F"
"ct109-187-14.ct109-187-14.3443","ct109-187-14",2015-02-27 18:30:05,23.75,85.4459392004127,-60.1957833989194,0,-24.067750493009,0.0965841653373101,"Kerguelen",1.925,"F"
"ct109-187-14.ct109-187-14.3444","ct109-187-14",2015-02-28 00:30:05,24,85.5336455814858,-60.1877469717549,0,-23.9712098073646,0.0965406856443751,"Kerguelen",1.87375,"F"
"ct109-187-14.ct109-187-14.3445","ct109-187-14",2015-02-28 06:30:05,24.25,85.4691748345912,-60.136793207457,0,-23.8747034536998,0.0965063536647687,"Kerguelen",1.775,"F"
"ct109-187-14.ct109-187-14.3446","ct109-187-14",2015-02-28 12:30:05,24.5,85.4947495734227,-60.1749464848328,0,-23.7782216930507,0.0964817606491558,"Kerguelen",1.19425,"F"
"ct109-187-14.ct109-187-14.3447","ct109-187-14",2015-02-28 18:30:05,24.75,85.6681181280249,-60.2399134653754,0,-23.6817536290708,0.0964680639798515,"Kerguelen",1.01025,"F"
"ct109-187-14.ct109-187-14.3448","ct109-187-14",2015-03-01 00:30:05,25,85.8629736897909,-60.3671552114101,0,-23.5852881587267,0.0964654703441342,"Kerguelen",1.006,"F"
"ct109-187-14.ct109-187-14.3449","ct109-187-14",2015-03-01 06:30:05,25.25,85.9896456129329,-60.4699142704075,0,-23.4888141020844,0.09647405664229,"Kerguelen",1.02375,"F"
"ct109-187-14.ct109-187-14.3450","ct109-187-14",2015-03-01 12:30:05,25.5,86.0123346250871,-60.5041560122482,0,-23.3923201990508,0.0964939030336009,"Kerguelen",1.029,"F"
"ct109-187-14.ct109-187-14.3451","ct109-187-14",2015-03-01 18:30:05,25.75,86.1130080499579,-60.5237804231473,0,-23.2957951060061,0.0965250930446915,"Kerguelen",1.0305,"F"
"ct109-187-14.ct109-187-14.3452","ct109-187-14",2015-03-02 00:30:05,26,86.1554328103324,-60.6091880059518,0,-23.199227392364,0.0965677136420595,"Kerguelen",1.0355,"F"
"ct109-187-14.ct109-187-14.3453","ct109-187-14",2015-03-02 06:30:05,26.25,86.3285179691619,-60.7195616984977,0,-23.1026055370163,0.0966218553477866,"Kerguelen",1.15775,"F"
"ct109-187-14.ct109-187-14.3454","ct109-187-14",2015-03-02 12:30:05,26.5,86.5359036242128,-60.7333800380206,0,-23.0059179246913,0.0966876123250027,"Kerguelen",1.25475,"F"
"ct109-187-14.ct109-187-14.3455","ct109-187-14",2015-03-02 18:30:05,26.75,86.5500240179694,-60.7512048645617,0,-22.9091528422211,0.0967650824701072,"Kerguelen",1.3045,"F"
"ct109-187-14.ct109-187-14.3456","ct109-187-14",2015-03-03 00:30:05,27,86.4158625349287,-60.7399929534423,0,-22.8122988853358,0.0968539568853927,"Kerguelen",1.31775,"F"
"ct109-187-14.ct109-187-14.3457","ct109-187-14",2015-03-03 06:30:05,27.25,86.5188883886976,-60.7661560813591,0,-22.7153459794022,0.0969529059335061,"Kerguelen",1.23875,"F"
"ct109-187-14.ct109-187-14.3458","ct109-187-14",2015-03-03 12:30:05,27.5,86.5512504371786,-60.8527669272719,0,-22.6182842670715,0.0970617123307732,"Kerguelen",1.191,"F"
"ct109-187-14.ct109-187-14.3459","ct109-187-14",2015-03-03 18:30:05,27.75,86.5527838630897,-60.9128321840659,0,-22.5211037952987,0.097180471772812,"Kerguelen",1.1585,"F"
"ct109-187-14.ct109-187-14.3460","ct109-187-14",2015-03-04 00:30:05,28,86.6208587057402,-60.9423482168327,0,-22.4237945117461,0.0973092835526046,"Kerguelen",1.12275,"F"
"ct109-187-14.ct109-187-14.3461","ct109-187-14",2015-03-04 06:30:05,28.25,86.6916336833212,-61.0079212349933,0,-22.3263462610477,0.0974482506984065,"Kerguelen",1.10275,"F"
"ct109-187-14.ct109-187-14.3462","ct109-187-14",2015-03-04 12:30:05,28.5,86.8805680193165,-61.1202627497108,0,-22.2287487809665,0.0975974800811213,"Kerguelen",1.16,"F"
"ct109-187-14.ct109-187-14.3463","ct109-187-14",2015-03-04 18:30:05,28.75,86.8561576279381,-61.1437737540026,0,-22.1309911240609,0.0977576569056587,"Kerguelen",1.11075,"F"
"ct109-187-14.ct109-187-14.3464","ct109-187-14",2015-03-05 00:30:05,29,86.978578387953,-61.1847926449413,0,-22.0330548150437,0.0979363090171936,"Kerguelen",1.04825,"F"
"ct109-187-14.ct109-187-14.3465","ct109-187-14",2015-03-05 06:30:05,29.25,87.3012490694213,-61.2815971919878,0,-21.9349160318302,0.0981387832134611,"Kerguelen",1.073,"F"
"ct109-187-14.ct109-187-14.3466","ct109-187-14",2015-03-05 12:30:05,29.5,87.2942634773405,-61.3729415319155,0,-21.8365506003276,0.0983654315025978,"Kerguelen",1.00075,"F"
"ct109-187-14.ct109-187-14.3467","ct109-187-14",2015-03-05 18:30:05,29.75,87.2445720465683,-61.5559274475211,0,-21.7379340873656,0.0986165129620464,"Kerguelen",1,"F"
"ct109-187-14.ct109-187-14.3468","ct109-187-14",2015-03-06 00:30:05,30,87.347675587688,-61.729016101533,0,-21.6390417900073,0.0988922973582468,"Kerguelen",1.00275,"F"
"ct109-187-14.ct109-187-14.3469","ct109-187-14",2015-03-06 06:30:05,30.25,87.5073572535598,-61.8315133782082,0,-21.5398487243398,0.0991930656675161,"Kerguelen",1.09075,"F"
"ct109-187-14.ct109-187-14.3470","ct109-187-14",2015-03-06 12:30:05,30.5,87.585743367761,-61.8426561569281,0,-21.4403296137479,0.0995191105919058,"Kerguelen",1.09275,"F"
"ct109-187-14.ct109-187-14.3471","ct109-187-14",2015-03-06 18:30:05,30.75,87.6777487178183,-61.8551221402218,0,-21.340458876597,0.0998707371508561,"Kerguelen",1.093,"F"
"ct109-187-14.ct109-187-14.3472","ct109-187-14",2015-03-07 00:30:05,31,87.8031145462369,-61.8749638741399,0,-21.2402106133272,0.100248263269856,"Kerguelen",1.102,"F"
"ct109-187-14.ct109-187-14.3473","ct109-187-14",2015-03-07 06:30:05,31.25,87.7840446104723,-61.8381026507082,0,-21.1395585928754,0.100652020451789,"Kerguelen",1.09,"F"
"ct109-187-14.ct109-187-14.3474","ct109-187-14",2015-03-07 12:30:05,31.5,87.8641543686169,-61.842489932156,0,-21.0384762384255,0.101082354449927,"Kerguelen",1.06475,"F"
"ct109-187-14.ct109-187-14.3475","ct109-187-14",2015-03-07 18:30:05,31.75,87.878393096539,-61.8530584472666,0,-20.9369366123949,0.101539626030531,"Kerguelen",1.02725,"F"
"ct109-187-14.ct109-187-14.3476","ct109-187-14",2015-03-08 00:30:05,32,88.0513037924298,-62.0222995148789,0,-20.8349124006531,0.102024211741847,"Kerguelen",1.0025,"F"
"ct109-187-14.ct109-187-14.3477","ct109-187-14",2015-03-08 06:30:05,32.25,88.1031269412514,-62.1557502375129,0,-20.7323758958724,0.102536504780676,"Kerguelen",1.00025,"F"
"ct109-187-14.ct109-187-14.3478","ct109-187-14",2015-03-08 12:30:05,32.5,88.1660500392514,-62.2784770929207,0,-20.6292989799973,0.103076915875089,"Kerguelen",1,"F"
"ct109-187-14.ct109-187-14.3479","ct109-187-14",2015-03-08 18:30:05,32.75,88.2439006980381,-62.4144019011928,0,-20.525653105728,0.103645874269381,"Kerguelen",1.001,"F"
"ct109-187-14.ct109-187-14.3480","ct109-187-14",2015-03-09 00:30:05,33,88.3547827403681,-62.4916869324253,0,-20.4214092769905,0.10424382873743,"Kerguelen",1.00025,"F"
"ct109-187-14.ct109-187-14.3481","ct109-187-14",2015-03-09 06:30:05,33.25,88.4858958119256,-62.5453085748963,0,-20.31653802829,0.104871248700553,"Kerguelen",1.00025,"F"
"ct109-187-14.ct109-187-14.3482","ct109-187-14",2015-03-09 12:30:05,33.5,88.6298129378179,-62.5964717567656,0,-20.2110094028798,0.105528625410167,"Kerguelen",1,"F"
"ct109-187-14.ct109-187-14.3483","ct109-187-14",2015-03-09 18:30:05,33.75,88.8652981859637,-62.6723743132054,0,-20.1047929296779,0.106216473201926,"Kerguelen",1,"F"
"ct109-187-14.ct109-187-14.3484","ct109-187-14",2015-03-10 00:30:05,34,89.2264255111832,-62.7929203679161,0,-19.9978575988046,0.106935330873231,"Kerguelen",1,"F"
"ct109-187-14.ct109-187-14.3485","ct109-187-14",2015-03-10 06:30:05,34.25,89.4677093283163,-62.941228242824,0,-19.890171835684,0.107685763120619,"Kerguelen",1.00025,"F"
"ct109-187-14.ct109-187-14.3486","ct109-187-14",2015-03-10 12:30:05,34.5,89.6576765543676,-63.0289628745673,0,-19.7817034735604,0.108468362123676,"Kerguelen",1.001,"F"
"ct109-187-14.ct109-187-14.3487","ct109-187-14",2015-03-10 18:30:05,34.75,89.8498063757799,-63.1003534606345,0,-19.6724197243545,0.109283749205819,"Kerguelen",1.01425,"F"
"ct109-187-14.ct109-187-14.3488","ct109-187-14",2015-03-11 00:30:05,35,89.887245390632,-63.1127806093162,0,-19.5622871476926,0.11013257666195,"Kerguelen",1.01575,"F"
"ct109-187-14.ct109-187-14.3489","ct109-187-14",2015-03-11 06:30:05,35.25,89.9788368551504,-63.1622089384969,0,-19.4512716180105,0.111015529682079,"Kerguelen",1.0155,"F"
"ct109-187-14.ct109-187-14.3490","ct109-187-14",2015-03-11 12:30:05,35.5,90.0543051312644,-63.2381945847324,0,-19.3393382895438,0.11193332846674,"Kerguelen",1.02175,"F"
"ct109-187-14.ct109-187-14.3491","ct109-187-14",2015-03-11 18:30:05,35.75,90.0608250267344,-63.3294592438858,0,-19.2264515643341,0.112886725209654,"Kerguelen",1.049,"F"
"ct109-187-14.ct109-187-14.3492","ct109-187-14",2015-03-12 00:30:05,36,90.0605223357783,-63.3568690359883,0,-19.1125752543288,0.11387631000529,"Kerguelen",1.062,"F"
"ct109-187-14.ct109-187-14.3493","ct109-187-14",2015-03-12 06:30:05,36.25,90.2848057776145,-63.450582521884,0,-18.9976726063399,0.114902647988968,"Kerguelen",1.09,"F"
"ct109-187-14.ct109-187-14.3494","ct109-187-14",2015-03-12 12:30:05,36.5,90.4997184562684,-63.5263494406696,0,-18.8817060085856,0.115966597754219,"Kerguelen",1.94875,"F"
"ct109-187-14.ct109-187-14.3495","ct109-187-14",2015-03-12 18:30:05,36.75,90.439028473219,-63.5214891085383,0,-18.7646363681961,0.117069640389564,"Kerguelen",1.96525,"F"
"ct109-187-14.ct109-187-14.3496","ct109-187-14",2015-03-13 00:30:05,37,90.4134997898635,-63.4937998508936,0,-18.6464177274365,0.118218640759607,"Kerguelen",1.981,"F"
"ct109-187-14.ct109-187-14.3497","ct109-187-14",2015-03-13 06:30:05,37.25,90.572314227357,-63.5879253708669,0,-18.5269994556078,0.119418271828625,"Kerguelen",1.98425,"F"
"ct109-187-14.ct109-187-14.3498","ct109-187-14",2015-03-13 12:30:05,37.5,90.5797433601695,-63.605356615312,0,-18.4063296080106,0.120669847597238,"Kerguelen",1.98525,"F"
"ct109-187-14.ct109-187-14.3499","ct109-187-14",2015-03-13 18:30:05,37.75,90.5626660514417,-63.6427576936414,0,-18.2843548974507,0.121974710559888,"Kerguelen",1.9865,"F"
"ct109-187-14.ct109-187-14.3500","ct109-187-14",2015-03-14 00:30:05,38,90.6169671255479,-63.677348487596,0,-18.1610218050389,0.123333092411806,"Kerguelen",1.987,"F"
"ct109-187-14.ct109-187-14.3501","ct109-187-14",2015-03-14 06:30:05,38.25,90.687475399188,-63.6144631572784,0,-18.0362930972009,0.124728707838029,"Kerguelen",1.9875,"F"
"ct109-187-14.ct109-187-14.3502","ct109-187-14",2015-03-14 12:30:05,38.5,90.7765038700312,-63.5906119454161,0,-17.9101439703985,0.126149126802408,"Kerguelen",1.9895,"F"
"ct109-187-14.ct109-187-14.3503","ct109-187-14",2015-03-14 18:30:05,38.75,90.821563958498,-63.6041260461886,0,-17.7825489118586,0.127595058539856,"Kerguelen",1.989,"F"
"ct109-187-14.ct109-187-14.3504","ct109-187-14",2015-03-15 00:30:05,39,90.8163119540092,-63.6092161844969,0,-17.6534808649689,0.129068046889685,"Kerguelen",1.98925,"F"
"ct109-187-14.ct109-187-14.3505","ct109-187-14",2015-03-15 06:30:05,39.25,90.9608145911983,-63.6065838449714,0,-17.5229109602076,0.130569904761327,"Kerguelen",1.99075,"F"
"ct109-187-14.ct109-187-14.3506","ct109-187-14",2015-03-15 12:30:05,39.5,91.0544876422767,-63.6055274914789,0,-17.3908090233946,0.132101936812959,"Kerguelen",1.99325,"F"
"ct109-187-14.ct109-187-14.3507","ct109-187-14",2015-03-15 18:30:05,39.75,91.0157754078919,-63.6159143174714,0,-17.2571435502307,0.133665473163977,"Kerguelen",1.99325,"F"
"ct109-187-14.ct109-187-14.3508","ct109-187-14",2015-03-16 00:30:05,40,91.1735173266442,-63.6336844892718,0,-17.1218816261653,0.135261924065333,"Kerguelen",1.99275,"F"
"ct109-187-14.ct109-187-14.3509","ct109-187-14",2015-03-16 06:30:05,40.25,91.2863508680723,-63.5959761595268,0,-16.9849888399754,0.136892786189927,"Kerguelen",1.992,"F"
"ct109-187-14.ct109-187-14.3510","ct109-187-14",2015-03-16 12:30:05,40.5,91.3061761059444,-63.5999991604851,0,-16.8464318815806,0.138556958394834,"Kerguelen",1.99175,"F"
"ct109-187-14.ct109-187-14.3511","ct109-187-14",2015-03-16 18:30:05,40.75,91.5378298605703,-63.6912977407619,0,-16.7061913907428,0.140240490837781,"Kerguelen",1.9955,"F"
"ct109-187-14.ct109-187-14.3512","ct109-187-14",2015-03-17 00:30:05,41,91.5670043021485,-63.6919889346542,0,-16.5642522576823,0.141939133060448,"Kerguelen",1.99525,"F"
"ct109-187-14.ct109-187-14.3513","ct109-187-14",2015-03-17 06:30:05,41.25,91.6621237024234,-63.6611518524723,0,-16.4205981000765,0.143654157605835,"Kerguelen",1.9945,"F"
"ct109-187-14.ct109-187-14.3514","ct109-187-14",2015-03-17 12:30:05,41.5,91.6195067201238,-63.6564286097355,0,-16.2752111826342,0.14538691744235,"Kerguelen",1.9915,"F"
"ct109-187-14.ct109-187-14.3515","ct109-187-14",2015-03-17 18:30:05,41.75,91.6011294371881,-63.6427353311974,0,-16.1280723374077,0.147138845226469,"Kerguelen",1.98675,"F"
"ct109-187-14.ct109-187-14.3516","ct109-187-14",2015-03-18 00:30:05,42,91.626385785147,-63.6334689305665,0,-15.9791608773595,0.148911460048204,"Kerguelen",1.98475,"F"
"ct109-187-14.ct109-187-14.3517","ct109-187-14",2015-03-18 06:30:05,42.25,91.697023117118,-63.5418562658256,0,-15.8284545025325,0.150706374826967,"Kerguelen",1.988,"F"
"ct109-187-14.ct109-187-14.3518","ct109-187-14",2015-03-18 12:30:05,42.5,91.85856088447,-63.5594841141939,0,-15.6759291979912,0.152525304541284,"Kerguelen",1.98475,"F"
"ct109-187-14.ct109-187-14.3519","ct109-187-14",2015-03-18 18:30:05,42.75,91.8683431400248,-63.5544696731182,0,-15.5215593737322,0.154369824258999,"Kerguelen",1.97675,"F"
"ct109-187-14.ct109-187-14.3520","ct109-187-14",2015-03-19 00:30:05,43,91.9297003993516,-63.4701822587613,0,-15.3653146618105,0.156244711921699,"Kerguelen",1.972,"F"
"ct109-187-14.ct109-187-14.3521","ct109-187-14",2015-03-19 06:30:05,43.25,91.773749265016,-63.4725337952174,0,-15.207148631346,0.158166030464535,"Kerguelen",1.91875,"F"
"ct109-187-14.ct109-187-14.3522","ct109-187-14",2015-03-19 12:30:05,43.5,91.771867621391,-63.514908570121,0,-15.047009546122,0.160139085224029,"Kerguelen",1.80125,"F"
"ct109-187-14.ct109-187-14.3523","ct109-187-14",2015-03-19 18:30:05,43.75,91.7527654260905,-63.5816341001728,0,-14.8848431499288,0.16216639619315,"Kerguelen",1.74775,"F"
"ct109-187-14.ct109-187-14.3524","ct109-187-14",2015-03-20 00:30:05,44,91.7375944710233,-63.610954692929,0,-14.7206078939051,0.164235256023676,"Kerguelen",1.68825,"F"
"ct109-187-14.ct109-187-14.3525","ct109-187-14",2015-03-20 06:30:05,44.25,91.8668523673423,-63.6527352541236,0,-14.554277454969,0.166330438936158,"Kerguelen",1.62575,"F"
"ct109-187-14.ct109-187-14.3526","ct109-187-14",2015-03-20 12:30:05,44.5,91.8635837414968,-63.7394799789606,0,-14.3858239547302,0.168453500238822,"Kerguelen",1.57875,"F"
"ct109-187-14.ct109-187-14.3527","ct109-187-14",2015-03-20 18:30:05,44.75,91.8911560089316,-63.8362027149458,0,-14.2152168245802,0.170607130149991,"Kerguelen",1.588,"F"
"ct109-187-14.ct109-187-14.3528","ct109-187-14",2015-03-21 00:30:05,45,91.8822764510824,-63.9030699830467,0,-14.0424225997036,0.172794224876535,"Kerguelen",1.64475,"F"
"ct109-187-14.ct109-187-14.3529","ct109-187-14",2015-03-21 06:30:05,45.25,91.8372872031155,-63.9518556793182,0,-13.8674046908007,0.175017908902902,"Kerguelen",1.66925,"F"
"ct109-187-14.ct109-187-14.3530","ct109-187-14",2015-03-21 12:30:05,45.5,91.6763789838123,-63.9215964920732,0,-13.6901231304893,0.177281560311424,"Kerguelen",1.68275,"F"
"ct109-187-14.ct109-187-14.3531","ct109-187-14",2015-03-21 18:30:05,45.75,91.5181051784679,-63.8287838887165,0,-13.5105339049519,0.179589225537402,"Kerguelen",1.87325,"F"
"ct109-187-14.ct109-187-14.3532","ct109-187-14",2015-03-22 00:30:05,46,91.5266026480014,-63.8171031708799,0,-13.3285827686297,0.181951136322214,"Kerguelen",1.89625,"F"
"ct109-187-14.ct109-187-14.3533","ct109-187-14",2015-03-22 06:30:05,46.25,91.353333436109,-63.7734973658412,0,-13.1442057662699,0.184377002359803,"Kerguelen",1.92075,"F"
"ct109-187-14.ct109-187-14.3534","ct109-187-14",2015-03-22 12:30:05,46.5,91.2933810396101,-63.7724055968948,0,-12.9573334859625,0.186872280307374,"Kerguelen",1.93325,"F"
"ct109-187-14.ct109-187-14.3535","ct109-187-14",2015-03-22 18:30:05,46.75,91.3458355164576,-63.7847658763845,0,-12.7678906829887,0.189442802973827,"Kerguelen",1.9415,"F"
"ct109-187-14.ct109-187-14.3536","ct109-187-14",2015-03-23 00:30:05,47,91.3293375292162,-63.7718443111742,0,-12.575795697821,0.192094985167698,"Kerguelen",1.9455,"F"
"ct109-187-14.ct109-187-14.3537","ct109-187-14",2015-03-23 06:30:05,47.25,91.1855335402431,-63.688002921071,0,-12.3809597962076,0.19483590161337,"Kerguelen",1.9555,"F"
"ct109-187-14.ct109-187-14.3538","ct109-187-14",2015-03-23 12:30:05,47.5,91.0595239442982,-63.6685296644826,0,-12.1832864182211,0.197673377986569,"Kerguelen",1.9775,"F"
"ct109-187-14.ct109-187-14.3539","ct109-187-14",2015-03-23 18:30:05,47.75,91.1114987277606,-63.607957771862,0,-11.982670320609,0.200616097612057,"Kerguelen",1.99525,"F"
"ct109-187-14.ct109-187-14.3540","ct109-187-14",2015-03-24 00:30:05,48,91.3024943351316,-63.6665951182003,0,-11.778996593364,0.203673727244984,"Kerguelen",2,"F"
"ct109-187-14.ct109-187-14.3541","ct109-187-14",2015-03-24 06:30:05,48.25,91.172409155963,-63.6553250375771,0,-11.5721395274128,0.206857065951196,"Kerguelen",1.99725,"F"
"ct109-187-14.ct109-187-14.3542","ct109-187-14",2015-03-24 12:30:05,48.5,91.0897104784126,-63.6719963310686,0,-11.3619696522526,0.210169875160182,"Kerguelen",1.99775,"F"
"ct109-187-14.ct109-187-14.3543","ct109-187-14",2015-03-24 18:30:05,48.75,91.0223043355565,-63.7100330765644,0,-11.148386560516,0.213583091736604,"Kerguelen",1.9985,"F"
"ct109-187-14.ct109-187-14.3544","ct109-187-14",2015-03-25 00:30:05,49,91.1709497475094,-63.6786527075734,0,-10.9313079727845,0.21707858773157,"Kerguelen",1.997,"F"
"ct109-187-14.ct109-187-14.3545","ct109-187-14",2015-03-25 06:30:05,49.25,91.21115214041,-63.7188125364664,0,-10.7106559836506,0.220651989133898,"Kerguelen",1.99225,"F"
"ct109-187-14.ct109-187-14.3546","ct109-187-14",2015-03-25 12:30:05,49.5,91.4409725508641,-63.7614091563064,0,-10.4863418003504,0.224314183300198,"Kerguelen",1.9925,"F"
"ct109-187-14.ct109-187-14.3547","ct109-187-14",2015-03-25 18:30:05,49.75,91.4496785697529,-63.804204766929,0,-10.2582644761928,0.228077324157523,"Kerguelen",1.9855,"F"
"ct109-187-14.ct109-187-14.3548","ct109-187-14",2015-03-26 00:30:05,50,91.4213210531221,-63.8400510764872,0,-10.0263425013895,0.23192197480332,"Kerguelen",1.98425,"F"
"ct109-187-14.ct109-187-14.3549","ct109-187-14",2015-03-26 06:30:05,50.25,91.4170488722472,-63.8369561319191,0,-9.79052826267746,0.235814238712058,"Kerguelen",1.98275,"F"
"ct109-187-14.ct109-187-14.3550","ct109-187-14",2015-03-26 12:30:05,50.5,91.3018401732359,-63.812331083507,0,-9.55076618625256,0.239762076424899,"Kerguelen",1.98,"F"
"ct109-187-14.ct109-187-14.3551","ct109-187-14",2015-03-26 18:30:05,50.75,91.2821158074943,-63.7612774130666,0,-9.30698789606048,0.243778290192084,"Kerguelen",1.978,"F"
"ct109-187-14.ct109-187-14.3552","ct109-187-14",2015-03-27 00:30:05,51,91.4832542082343,-63.692591369812,0,-9.05911027900999,0.247877617050492,"Kerguelen",1.98,"F"
"ct109-187-14.ct109-187-14.3553","ct109-187-14",2015-03-27 06:30:05,51.25,91.4735247972677,-63.6292934446385,0,-8.80703312833563,0.252077150674364,"Kerguelen",1.97925,"F"
"ct109-187-14.ct109-187-14.3554","ct109-187-14",2015-03-27 12:30:05,51.5,91.4840175301381,-63.6257589138713,0,-8.55063625160283,0.256396876732796,"Kerguelen",1.97725,"F"
"ct109-187-14.ct109-187-14.3555","ct109-187-14",2015-03-27 18:30:05,51.75,91.424106197715,-63.643700570043,0,-8.28977589270924,0.260860358893593,"Kerguelen",1.973,"F"
"ct109-187-14.ct109-187-14.3556","ct109-187-14",2015-03-28 00:30:05,52,91.5155820690518,-63.6132422352667,0,-8.02428026507747,0.265495627631764,"Kerguelen",1.961,"F"
"ct109-187-14.ct109-187-14.3557","ct109-187-14",2015-03-28 06:30:05,52.25,91.7207214287451,-63.5627277213141,0,-7.75394391974446,0.270336345333014,"Kerguelen",1.96525,"F"
"ct109-187-14.ct109-187-14.3558","ct109-187-14",2015-03-28 12:30:05,52.5,91.7010012941636,-63.43647381207,0,-7.47852056586035,0.275423353884106,"Kerguelen",1.99175,"F"
"ct109-187-14.ct109-187-14.3559","ct109-187-14",2015-03-28 18:30:05,52.75,91.6948989252481,-63.4134290211923,0,-7.19771380584577,0.280806760014582,"Kerguelen",1.9935,"F"
"ct109-187-14.ct109-187-14.3560","ct109-187-14",2015-03-29 00:30:05,53,91.7937707431845,-63.4372427359476,0,-6.9111650147757,0.286548791070075,"Kerguelen",1.99475,"F"
"ct109-187-14.ct109-187-14.3561","ct109-187-14",2015-03-29 06:30:05,53.25,91.9419194983789,-63.3858277610131,0,-6.6184372380236,0.292727776752097,"Kerguelen",1.99675,"F"
"ct109-187-14.ct109-187-14.3562","ct109-187-14",2015-03-29 12:30:05,53.5,91.8801463210128,-63.3712770681312,0,-6.31899342282743,0.299443815196168,"Kerguelen",1.99425,"F"
"ct109-187-14.ct109-187-14.3563","ct109-187-14",2015-03-29 18:30:05,53.75,91.8132652316867,-63.3815658586654,0,-6.01216639835391,0.30682702447352,"Kerguelen",1.99325,"F"
"ct109-187-14.ct109-187-14.3564","ct109-187-14",2015-03-30 00:30:05,54,91.8020586868876,-63.4025383748802,0,-5.69711651481476,0.315049883539149,"Kerguelen",1.9915,"F"
"ct109-187-14.ct109-187-14.3565","ct109-187-14",2015-03-30 06:30:05,54.25,91.9158021990477,-63.4110467256557,0,-5.37277024676923,0.324346268045533,"Kerguelen",1.9875,"F"
"ct109-187-14.ct109-187-14.3566","ct109-187-14",2015-03-30 12:30:05,54.5,91.9432802847643,-63.3556604858908,0,-5.03772834702669,0.335041899742541,"Kerguelen",1.984,"F"
"ct109-187-14.ct109-187-14.3567","ct109-187-14",2015-03-30 18:30:05,54.75,91.9745743755798,-63.3248011750894,0,-4.6901289506548,0.347599396371887,"Kerguelen",1.97975,"F"
"ct109-187-14.ct109-187-14.3568","ct109-187-14",2015-03-31 00:30:05,55,92.0516580136374,-63.3011780368741,0,-4.32757672138346,0.362552229271344,"Kerguelen",1.97725,"F"
"ct109-187-14.ct109-187-14.3569","ct109-187-14",2015-03-31 06:30:05,55.25,92.0783982405243,-63.2583679940031,0,-3.94683524263895,0.380741478744508,"Kerguelen",1.978,"F"
"ct109-187-14.ct109-187-14.3570","ct109-187-14",2015-03-31 12:30:05,55.5,92.0247486902227,-63.2282079819426,0,-3.54303474341304,0.403800499225907,"Kerguelen",1.98075,"F"
"ct109-187-14.ct109-187-14.3571","ct109-187-14",2015-03-31 18:30:05,55.75,92.0182796604666,-63.2071635676073,0,-3.10832458172303,0.434710161690014,"Kerguelen",1.9835,"F"
"ct109-187-14.ct109-187-14.3572","ct109-187-14",2015-04-01 00:30:05,56,91.9511423431203,-63.2117380561618,0,-2.62873612566362,0.479588456059408,"Kerguelen",1.98725,"F"
"ct109-187-14.ct109-187-14.3573","ct109-187-14",2015-04-01 06:30:05,56.25,91.8646171733782,-63.2311087167831,0,-2.07503874920716,0.553697376456455,"Kerguelen",1.99225,"F"
"ct109-187-14.ct109-187-14.3574","ct109-187-14",2015-04-01 12:30:05,56.5,91.8906366430759,-63.2211421381545,0,-1.36207463888804,0.712964110319125,"Kerguelen",1.9935,"F"
"ct109-187-14.ct109-187-14.3575","ct109-187-14",2015-04-01 18:30:05,56.75,92.0133979460206,-63.2004330116202,0,0.659085356276368,2.02115999516441,"Kerguelen",1.996,"F"
"ct109-187-14.ct109-187-14.3576","ct109-187-14",2015-04-02 00:30:05,57,91.9101467100426,-63.1807929294123,0,1.59880069983882,0.939715343562455,"Kerguelen",1.99625,"F"
"ct109-187-14.ct109-187-14.3577","ct109-187-14",2015-04-02 06:30:05,57.25,91.996097206957,-63.1605613055425,0,2.12204617378709,0.523245473948272,"Kerguelen",1.998,"F"
"ct109-187-14.ct109-187-14.3578","ct109-187-14",2015-04-02 12:30:05,57.5,92.1063018494944,-63.226273830921,0,2.50362599221793,0.381579818430831,"Kerguelen",1.99925,"F"
"ct109-187-14.ct109-187-14.3579","ct109-187-14",2015-04-02 18:30:05,57.75,92.0441613036051,-63.2074529748613,0,2.80079375532473,0.297167763106804,"Kerguelen",1.99825,"F"
"ct109-187-14.ct109-187-14.3580","ct109-187-14",2015-04-03 00:30:05,58,92.1524780689495,-63.1836647536831,0,3.0378731130493,0.237079357724565,"Kerguelen",1.998,"F"
"ct109-187-14.ct109-187-14.3581","ct109-187-14",2015-04-03 06:30:05,58.25,92.1904239080037,-63.1246137116229,0,3.22827383108338,0.190400718034089,"Kerguelen",2,"F"
"ct109-187-14.ct109-187-14.3582","ct109-187-14",2015-04-03 12:30:05,58.5,92.1913181087949,-63.2119169614104,0,3.38005948888591,0.151785657802526,"Kerguelen",1.99725,"F"
"ct109-187-14.ct109-187-14.3583","ct109-187-14",2015-04-03 18:30:05,58.75,92.2792226506108,-63.2791679589004,0,3.49841241605093,0.118352927165024,"Kerguelen",1.999,"F"
"ct109-187-14.ct109-187-14.3584","ct109-187-14",2015-04-04 00:30:05,59,92.2916229568105,-63.2723443944824,0,3.58678496340515,0.0883725473542103,"Kerguelen",1.99725,"F"
"ct109-187-14.ct109-187-14.3585","ct109-187-14",2015-04-04 06:30:05,59.25,92.0749678259616,-63.1635737460965,0,3.64748863986219,0.0607036764570489,"Kerguelen",1.99925,"F"
"ct109-187-14.ct109-187-14.3586","ct109-187-14",2015-04-04 12:30:05,59.5,92.1328355816391,-63.150173875069,0,3.68201569141015,0.0345270515479522,"Kerguelen",1.982,"F"
"ct109-187-14.ct109-187-14.3587","ct109-187-14",2015-04-04 18:30:05,59.75,92.1519330067796,-63.1303137977948,0,3.69121707982137,0.00920138841122783,"Kerguelen",1.96325,"F"
"ct109-187-14.ct109-187-14.3588","ct109-187-14",2015-04-05 00:30:05,60,92.0099473675428,-63.1190526861993,0,3.67539307431512,-0.0158240055062542,"Kerguelen",1.93625,"F"
"ct109-188-14.ct109-188-14.3640","ct109-188-14",2015-02-08 20:19:59,0.25,76.6297600319938,-53.1444779324331,0,-34.1188674590665,0.0352699707473203,"Kerguelen",1,"F"
"ct109-188-14.ct109-188-14.3641","ct109-188-14",2015-02-09 02:19:59,0.5,77.0425699390645,-53.3902665633498,0,-34.0835901947527,0.0352772643138044,"Kerguelen",1,"F"
"ct109-188-14.ct109-188-14.3642","ct109-188-14",2015-02-09 08:19:59,0.75,77.385835450715,-53.6058837287727,0,-34.0482983157191,0.0352918790335777,"Kerguelen",1,"F"
"ct109-188-14.ct109-188-14.3643","ct109-188-14",2015-02-09 14:19:59,1,77.70048046836,-53.79909231804,0,-34.0129845071703,0.0353138085488647,"Kerguelen",1,"F"
"ct109-188-14.ct109-188-14.3644","ct109-188-14",2015-02-09 20:19:59,1.25,78.0460282323383,-53.9602082625223,0,-33.9776414604957,0.0353430466745408,"Kerguelen",1,"F"
"ct109-188-14.ct109-188-14.3645","ct109-188-14",2015-02-10 02:19:59,1.5,78.4031772982424,-54.0482179688098,0,-33.9422618730889,0.0353795874068585,"Kerguelen",1,"F"
"ct109-188-14.ct109-188-14.3646","ct109-188-14",2015-02-10 08:19:59,1.75,78.9307636811015,-54.1041737900813,0,-33.9068384481797,0.0354234249091867,"Kerguelen",1,"F"
"ct109-188-14.ct109-188-14.3647","ct109-188-14",2015-02-10 14:19:59,2,79.3928054890664,-54.183508129661,0,-33.8713638946637,0.0354745535160184,"Kerguelen",1,"F"
"ct109-188-14.ct109-188-14.3648","ct109-188-14",2015-02-10 20:19:59,2.25,79.7508484465835,-54.358545134486,0,-33.8358309269335,0.0355329677301786,"Kerguelen",1,"F"
"ct109-188-14.ct109-188-14.3649","ct109-188-14",2015-02-11 02:19:59,2.5,80.0935687701622,-54.5495434317925,0,-33.8002322647122,0.0355986622212312,"Kerguelen",1,"F"
"ct109-188-14.ct109-188-14.3650","ct109-188-14",2015-02-11 08:19:59,2.75,80.5037258050798,-54.7405258605355,0,-33.7645606328885,0.0356716318237249,"Kerguelen",1,"F"
"ct109-188-14.ct109-188-14.3651","ct109-188-14",2015-02-11 14:19:59,3,80.7947346572262,-54.8714210728544,0,-33.7288087613512,0.0357518715372762,"Kerguelen",1,"F"
"ct109-188-14.ct109-188-14.3652","ct109-188-14",2015-02-11 20:19:59,3.25,81.1005605187437,-55.055125417049,0,-33.6929693848262,0.0358393765250375,"Kerguelen",1,"F"
"ct109-188-14.ct109-188-14.3653","ct109-188-14",2015-02-12 02:19:59,3.5,81.3753429127154,-55.2807581539095,0,-33.6570352427123,0.0359341421139081,"Kerguelen",1,"F"
"ct109-188-14.ct109-188-14.3654","ct109-188-14",2015-02-12 08:19:59,3.75,81.629779398006,-55.5186011200668,0,-33.6209990789181,0.0360361637941786,"Kerguelen",1,"F"
"ct109-188-14.ct109-188-14.3655","ct109-188-14",2015-02-12 14:19:59,4,81.908792889691,-55.769494237019,0,-33.5848534972088,0.036145581709307,"Kerguelen",1,"F"
"ct109-188-14.ct109-188-14.3656","ct109-188-14",2015-02-12 20:19:59,4.25,82.3758722316796,-56.0819368095026,0,-33.5485877823243,0.0362657148844647,"Kerguelen",1,"F"
"ct109-188-14.ct109-188-14.3657","ct109-188-14",2015-02-13 02:19:59,4.5,82.7318134879919,-56.352549022107,0,-33.5121879026736,0.0363998796507559,"Kerguelen",1,"F"
"ct109-188-14.ct109-188-14.3658","ct109-188-14",2015-02-13 08:19:59,4.75,83.2468265926559,-56.6891965929373,0,-33.4756396912581,0.0365482114154769,"Kerguelen",1,"F"
"ct109-188-14.ct109-188-14.3659","ct109-188-14",2015-02-13 14:19:59,5,83.670554676001,-57.0216688908612,0,-33.4389289899728,0.0367107012853307,"Kerguelen",1,"F"
"ct109-188-14.ct109-188-14.3660","ct109-188-14",2015-02-13 20:19:59,5.25,84.0081162203605,-57.2451708308091,0,-33.4020414565481,0.0368875334247121,"Kerguelen",1,"F"
"ct109-188-14.ct109-188-14.3661","ct109-188-14",2015-02-14 02:19:59,5.5,84.3127317881394,-57.4571722029045,0,-33.3649555810684,0.0370858754797199,"Kerguelen",1,"F"
"ct109-188-14.ct109-188-14.3662","ct109-188-14",2015-02-14 08:19:59,5.75,84.5840621116693,-57.6938246002924,0,-33.3276407255531,0.0373148555152969,"Kerguelen",1,"F"
"ct109-188-14.ct109-188-14.3663","ct109-188-14",2015-02-14 14:19:59,6,84.8671075510668,-57.9402689513532,0,-33.2900656786776,0.0375750468754599,"Kerguelen",1,"F"
"ct109-188-14.ct109-188-14.3664","ct109-188-14",2015-02-14 20:19:59,6.25,84.9829443005629,-58.2221793332782,0,-33.2521992488206,0.0378664298569864,"Kerguelen",1,"F"
"ct109-188-14.ct109-188-14.3665","ct109-188-14",2015-02-15 02:19:59,6.5,85.3068262252925,-58.502905490664,0,-33.2140102634854,0.0381889853352191,"Kerguelen",1,"F"
"ct109-188-14.ct109-188-14.3666","ct109-188-14",2015-02-15 08:19:59,6.75,85.6066963827378,-58.8049284450307,0,-33.1754676039282,0.0385426595571503,"Kerguelen",1,"F"
"ct109-188-14.ct109-188-14.3667","ct109-188-14",2015-02-15 14:19:59,7,85.6966484734861,-59.1000369571796,0,-33.1365416323271,0.0389259716011781,"Kerguelen",1,"F"
"ct109-188-14.ct109-188-14.3668","ct109-188-14",2015-02-15 20:19:59,7.25,86.0200923116938,-59.4006306667299,0,-33.0972046839562,0.0393369483708106,"Kerguelen",1,"F"
"ct109-188-14.ct109-188-14.3669","ct109-188-14",2015-02-16 02:19:59,7.5,86.461064389566,-59.6836224828537,0,-33.0574292450376,0.0397754389186988,"Kerguelen",1,"F"
"ct109-188-14.ct109-188-14.3670","ct109-188-14",2015-02-16 08:19:59,7.75,87.0613693611154,-59.9875874925213,0,-33.0171878154543,0.0402414295832598,"Kerguelen",1,"F"
"ct109-188-14.ct109-188-14.3671","ct109-188-14",2015-02-16 14:19:59,8,87.4795190335571,-60.2415772465866,0,-32.9764529081331,0.0407349073211716,"Kerguelen",1,"F"
"ct109-188-14.ct109-188-14.3672","ct109-188-14",2015-02-16 20:19:59,8.25,87.9474532381575,-60.5056209862951,0,-32.9351970484018,0.041255859731304,"Kerguelen",1,"F"
"ct109-188-14.ct109-188-14.3673","ct109-188-14",2015-02-17 02:19:59,8.5,88.2240062107529,-60.7219612213527,0,-32.8933927733001,0.0418042751016645,"Kerguelen",1,"F"
"ct109-188-14.ct109-188-14.3674","ct109-188-14",2015-02-17 08:19:59,8.75,88.4850655247809,-60.878248334327,0,-32.851012630844,0.0423801424561887,"Kerguelen",1,"F"
"ct109-188-14.ct109-188-14.3675","ct109-188-14",2015-02-17 14:19:59,9,88.9468264091672,-61.0954871111446,0,-32.808029179235,0.0429834516089522,"Kerguelen",1,"F"
"ct109-188-14.ct109-188-14.3676","ct109-188-14",2015-02-17 20:19:59,9.25,89.4427083312168,-61.3082908316482,0,-32.76441498601,0.0436141932250222,"Kerguelen",1,"F"
"ct109-188-14.ct109-188-14.3677","ct109-188-14",2015-02-18 02:19:59,9.5,89.8427059358662,-61.5752526175489,0,-32.7201426271208,0.0442723588892135,"Kerguelen",1,"F"
"ct109-188-14.ct109-188-14.3678","ct109-188-14",2015-02-18 08:19:59,9.75,90.1502744068361,-61.8161214730378,0,-32.6751846859399,0.0449579411808732,"Kerguelen",1,"F"
"ct109-188-14.ct109-188-14.3679","ct109-188-14",2015-02-18 14:19:59,10,90.4350581254173,-62.0467183853194,0,-32.6295137521821,0.0456709337577632,"Kerguelen",1,"F"
"ct109-188-14.ct109-188-14.3680","ct109-188-14",2015-02-18 20:19:59,10.25,90.6950082784271,-62.2626664080147,0,-32.5831024207352,0.0464113314468995,"Kerguelen",1,"F"
"ct109-188-14.ct109-188-14.3681","ct109-188-14",2015-02-19 02:19:59,10.5,90.9356560989486,-62.4926601340634,0,-32.5359232903906,0.0471791303446101,"Kerguelen",1,"F"
"ct109-188-14.ct109-188-14.3682","ct109-188-14",2015-02-19 08:19:59,10.75,91.2879628141771,-62.6883419394049,0,-32.4879489624646,0.0479743279259814,"Kerguelen",1,"F"
"ct109-188-14.ct109-188-14.3683","ct109-188-14",2015-02-19 14:19:59,11,91.7259196333822,-62.8859030985506,0,-32.4391558367755,0.0487931256891061,"Kerguelen",1,"F"
"ct109-188-14.ct109-188-14.3684","ct109-188-14",2015-02-19 20:19:59,11.25,92.2272491166569,-63.1192456927937,0,-32.389552862832,0.0496029739435577,"Kerguelen",1,"F"
"ct109-188-14.ct109-188-14.3685","ct109-188-14",2015-02-20 02:19:59,11.5,92.6301719858837,-63.3151282440689,0,-32.3391410789502,0.0504117838817653,"Kerguelen",1,"F"
"ct109-188-14.ct109-188-14.3686","ct109-188-14",2015-02-20 08:19:59,11.75,93.1251941315995,-63.5651043834165,0,-32.2879090149606,0.0512320639896202,"Kerguelen",1,"F"
"ct109-188-14.ct109-188-14.3687","ct109-188-14",2015-02-20 14:19:59,12,93.6146512720387,-63.8035561169663,0,-32.2358451236293,0.0520638913313443,"Kerguelen",1,"F"
"ct109-188-14.ct109-188-14.3688","ct109-188-14",2015-02-20 20:19:59,12.25,93.8431690026038,-64.0561456431429,0,-32.182937841987,0.0529072816423004,"Kerguelen",1,"F"
"ct109-188-14.ct109-188-14.3689","ct109-188-14",2015-02-21 02:19:59,12.5,94.1055726833528,-64.2723030940603,0,-32.129175589719,0.0537622522679915,"Kerguelen",1,"F"
"ct109-188-14.ct109-188-14.3690","ct109-188-14",2015-02-21 08:19:59,12.75,94.4935337897632,-64.5160232890797,0,-32.0745467674679,0.054628822251096,"Kerguelen",1.98675,"F"
"ct109-188-14.ct109-188-14.3691","ct109-188-14",2015-02-21 14:19:59,13,94.5996544313494,-64.527051607292,0,-32.0190397550446,0.0555070124232171,"Kerguelen",1.9245,"F"
"ct109-188-14.ct109-188-14.3692","ct109-188-14",2015-02-21 20:19:59,13.25,94.6021955544957,-64.4944361028745,0,-31.9626429095445,0.0563968455001507,"Kerguelen",1.82675,"F"
"ct109-188-14.ct109-188-14.3693","ct109-188-14",2015-02-22 02:19:59,13.5,94.5631666125865,-64.487834328892,0,-31.9053445633638,0.0572983461806731,"Kerguelen",1.696,"F"
"ct109-188-14.ct109-188-14.3694","ct109-188-14",2015-02-22 08:19:59,13.75,94.6053399168936,-64.6061586454084,0,-31.8471330221135,0.0582115412503637,"Kerguelen",1.3975,"F"
"ct109-188-14.ct109-188-14.3695","ct109-188-14",2015-02-22 14:19:59,14,94.7772517693857,-64.7824795856457,1,-31.7879965624235,0.059136459689918,"Kerguelen",1.59,"F"
"ct109-188-14.ct109-188-14.3696","ct109-188-14",2015-02-22 20:19:59,14.25,94.9175477804344,-64.7190645998763,1,-31.727923429642,0.0600731327814963,"Kerguelen",1.01475,"F"
"ct109-188-14.ct109-188-14.3697","ct109-188-14",2015-02-23 02:19:59,14.5,95.2220866663747,-64.6112299005552,0,-31.6669018354048,0.0610215942372927,"Kerguelen",1,"F"
"ct109-188-14.ct109-188-14.3698","ct109-188-14",2015-02-23 08:19:59,14.75,95.5566545155348,-64.4737077113464,0,-31.6049199550957,0.0619818803090311,"Kerguelen",1,"F"
"ct109-188-14.ct109-188-14.3699","ct109-188-14",2015-02-23 14:19:59,15,95.9804662293243,-64.3548847161893,0,-31.5419659249101,0.0629540301856357,"Kerguelen",1,"F"
"ct109-188-14.ct109-188-14.3700","ct109-188-14",2015-02-23 20:19:59,15.25,96.5304143388576,-64.3415843860986,0,-31.4780260192762,0.0639399056338696,"Kerguelen",1,"F"
"ct109-188-14.ct109-188-14.3701","ct109-188-14",2015-02-24 02:19:59,15.5,97.0917589101483,-64.3131127967077,0,-31.4130803021833,0.0649457170929513,"Kerguelen",1,"F"
"ct109-188-14.ct109-188-14.3702","ct109-188-14",2015-02-24 08:19:59,15.75,97.6114399224426,-64.2275419294916,0,-31.347107487059,0.0659728151242933,"Kerguelen",1,"F"
"ct109-188-14.ct109-188-14.3703","ct109-188-14",2015-02-24 14:19:59,16,98.0581456884964,-64.2033881556484,0,-31.2800875300385,0.0670199570204588,"Kerguelen",1,"F"
"ct109-188-14.ct109-188-14.3704","ct109-188-14",2015-02-24 20:19:59,16.25,98.5578649541534,-64.1646274925602,0,-31.2120094435323,0.0680780865062069,"Kerguelen",1,"F"
"ct109-188-14.ct109-188-14.3705","ct109-188-14",2015-02-25 02:19:59,16.5,99.0467411049161,-64.1313716772332,0,-31.142866097326,0.0691433462062963,"Kerguelen",1,"F"
"ct109-188-14.ct109-188-14.3706","ct109-188-14",2015-02-25 08:19:59,16.75,99.440110996696,-64.1799219281975,0,-31.0726503126197,0.0702157847062679,"Kerguelen",1,"F"
"ct109-188-14.ct109-188-14.3707","ct109-188-14",2015-02-25 14:19:59,17,99.7629355357582,-64.277189040501,0,-31.0013548433475,0.0712954692722645,"Kerguelen",1,"F"
"ct109-188-14.ct109-188-14.3708","ct109-188-14",2015-02-25 20:19:59,17.25,100.221595614571,-64.245402421113,0,-30.9289723725439,0.0723824708035448,"Kerguelen",1,"F"
"ct109-188-14.ct109-188-14.3709","ct109-188-14",2015-02-26 02:19:59,17.5,100.680050293732,-64.3124916663653,0,-30.8554955085752,0.0734768639687022,"Kerguelen",1.00875,"F"
"ct109-188-14.ct109-188-14.3710","ct109-188-14",2015-02-26 08:19:59,17.75,100.93892834462,-64.4015587935601,0,-30.7809167812102,0.0745787273650156,"Kerguelen",1.17925,"F"
"ct109-188-14.ct109-188-14.3711","ct109-188-14",2015-02-26 14:19:59,18,101.117529251494,-64.37624914879,0,-30.7052286375505,0.0756881436597079,"Kerguelen",1.22225,"F"
"ct109-188-14.ct109-188-14.3712","ct109-188-14",2015-02-26 20:19:59,18.25,101.083641553021,-64.3633201676695,0,-30.6284234377945,0.0768051997559638,"Kerguelen",1.20875,"F"
"ct109-188-14.ct109-188-14.3713","ct109-188-14",2015-02-27 02:19:59,18.5,101.003629316832,-64.3830801846148,0,-30.5504934508381,0.0779299869564709,"Kerguelen",1.16325,"F"
"ct109-188-14.ct109-188-14.3714","ct109-188-14",2015-02-27 08:19:59,18.75,101.062908727929,-64.4726895352804,0,-30.4714308497017,0.0790626011363704,"Kerguelen",1.10025,"F"
"ct109-188-14.ct109-188-14.3715","ct109-188-14",2015-02-27 14:19:59,19,101.237485305581,-64.5094292015125,0,-30.3912277067785,0.0802031429231631,"Kerguelen",1.021,"F"
"ct109-188-14.ct109-188-14.3716","ct109-188-14",2015-02-27 20:19:59,19.25,101.45879291201,-64.4702449235281,0,-30.3098759888959,0.081351717882594,"Kerguelen",1.00025,"F"
"ct109-188-14.ct109-188-14.3717","ct109-188-14",2015-02-28 02:19:59,19.5,101.876762716436,-64.453461019036,0,-30.2273675521818,0.0825084367141016,"Kerguelen",1,"F"
"ct109-188-14.ct109-188-14.3718","ct109-188-14",2015-02-28 08:19:59,19.75,102.50888507687,-64.5112698934769,0,-30.1436941367277,0.0836734154541385,"Kerguelen",1,"F"
"ct109-188-14.ct109-188-14.3719","ct109-188-14",2015-02-28 14:19:59,20,103.165555942615,-64.6346931119667,0,-30.0588473610406,0.0848467756870863,"Kerguelen",1,"F"
"ct109-188-14.ct109-188-14.3720","ct109-188-14",2015-02-28 20:19:59,20.25,103.911632200472,-64.8250677103761,1,-29.9728187162736,0.0860286447669834,"Kerguelen",1.5335,"F"
"ct109-188-14.ct109-188-14.3721","ct109-188-14",2015-03-01 02:19:59,20.5,104.055250405212,-64.8297946773657,1,-29.8855995602243,0.0872191560493729,"Kerguelen",1.008,"F"
"ct109-188-14.ct109-188-14.3722","ct109-188-14",2015-03-01 08:19:59,20.75,104.543717180953,-64.8848381821203,1,-29.797181111098,0.0884184491262541,"Kerguelen",1,"F"
"ct109-188-14.ct109-188-14.3723","ct109-188-14",2015-03-01 14:19:59,21,104.882595369508,-64.9817100963693,0,-29.7075546316794,0.089626479418603,"Kerguelen",1,"F"
"ct109-188-14.ct109-188-14.3724","ct109-188-14",2015-03-01 20:19:59,21.25,105.34873033643,-64.9955170056973,0,-29.6167170177604,0.0908376139190481,"Kerguelen",1,"F"
"ct109-188-14.ct109-188-14.3725","ct109-188-14",2015-03-02 02:19:59,21.5,105.831043912931,-65.0682620115064,0,-29.5246717036578,0.0920453141025623,"Kerguelen",1.75175,"F"
"ct109-188-14.ct109-188-14.3726","ct109-188-14",2015-03-02 08:19:59,21.75,105.994732422394,-64.9819976826888,0,-29.4314223459782,0.0932493576796423,"Kerguelen",1.78475,"F"
"ct109-188-14.ct109-188-14.3727","ct109-188-14",2015-03-02 14:19:59,22,106.192634301729,-64.940497324238,0,-29.3369724467126,0.0944498992655252,"Kerguelen",1.9195,"F"
"ct109-188-14.ct109-188-14.3728","ct109-188-14",2015-03-02 20:19:59,22.25,106.186118859309,-64.9406877105621,0,-29.2413253487758,0.0956470979368518,"Kerguelen",1.9465,"F"
"ct109-188-14.ct109-188-14.3729","ct109-188-14",2015-03-03 02:19:59,22.5,106.155254987736,-64.9012872427636,0,-29.1444842314587,0.096841117317098,"Kerguelen",1.9705,"F"
"ct109-188-14.ct109-188-14.3730","ct109-188-14",2015-03-03 08:19:59,22.75,106.278429044121,-64.9506216562462,0,-29.0464521057896,0.0980321256690342,"Kerguelen",1.972,"F"
"ct109-188-14.ct109-188-14.3731","ct109-188-14",2015-03-03 14:19:59,23,106.304178697864,-65.0615663611221,0,-28.9472318097974,0.0992202959922306,"Kerguelen",1.98825,"F"
"ct109-188-14.ct109-188-14.3732","ct109-188-14",2015-03-03 20:19:59,23.25,106.308712423237,-65.0647269863548,0,-28.8468260036714,0.100405806126036,"Kerguelen",1.98725,"F"
"ct109-188-14.ct109-188-14.3733","ct109-188-14",2015-03-04 02:19:59,23.5,106.38583441093,-65.085760113038,0,-28.7452371648097,0.101588838861633,"Kerguelen",1.98925,"F"
"ct109-188-14.ct109-188-14.3734","ct109-188-14",2015-03-04 08:19:59,23.75,106.282545428622,-65.1223005031544,0,-28.6424697862547,0.102767378555052,"Kerguelen",1.988,"F"
"ct109-188-14.ct109-188-14.3735","ct109-188-14",2015-03-04 14:19:59,24,106.209563029995,-65.0760143113127,0,-28.5385428839599,0.103926902294815,"Kerguelen",1.9835,"F"
"ct109-188-14.ct109-188-14.3736","ct109-188-14",2015-03-04 20:19:59,24.25,106.20867420353,-65.0561057716212,0,-28.4334797493594,0.105063134600442,"Kerguelen",1.97875,"F"
"ct109-188-14.ct109-188-14.3737","ct109-188-14",2015-03-05 02:19:59,24.5,106.128620320111,-65.0484492042158,0,-28.327303293108,0.106176456251461,"Kerguelen",1.96925,"F"
"ct109-188-14.ct109-188-14.3738","ct109-188-14",2015-03-05 08:19:59,24.75,106.127416181118,-64.9894193675448,0,-28.2200362829647,0.107267010143236,"Kerguelen",1.962,"F"
"ct109-188-14.ct109-188-14.3739","ct109-188-14",2015-03-05 14:19:59,25,105.942403074612,-65.0171716719956,0,-28.1117021826072,0.108334100357571,"Kerguelen",1.94225,"F"
"ct109-188-14.ct109-188-14.3740","ct109-188-14",2015-03-05 20:19:59,25.25,105.904585461741,-65.0521752439217,0,-28.0023263761239,0.109375806483253,"Kerguelen",1.914,"F"
"ct109-188-14.ct109-188-14.3741","ct109-188-14",2015-03-06 02:19:59,25.5,105.897075925612,-65.060387581165,0,-27.8919344282671,0.110391947856775,"Kerguelen",1.8745,"F"
"ct109-188-14.ct109-188-14.3742","ct109-188-14",2015-03-06 08:19:59,25.75,105.60370140285,-64.9782637241825,0,-27.7805518082396,0.111382620027506,"Kerguelen",1.85,"F"
"ct109-188-14.ct109-188-14.3743","ct109-188-14",2015-03-06 14:19:59,26,105.530153666062,-64.933033971126,0,-27.6682046611851,0.112347147054548,"Kerguelen",1.76975,"F"
"ct109-188-14.ct109-188-14.3744","ct109-188-14",2015-03-06 20:19:59,26.25,105.516483668304,-64.9967777029111,0,-27.554919897275,0.113284763910043,"Kerguelen",1.4615,"F"
"ct109-188-14.ct109-188-14.3745","ct109-188-14",2015-03-07 02:19:59,26.5,105.711357218607,-65.0255685451933,0,-27.4407243678229,0.114195529452094,"Kerguelen",1.03275,"F"
"ct109-188-14.ct109-188-14.3746","ct109-188-14",2015-03-07 08:19:59,26.75,106.00041872419,-65.0396262868097,0,-27.3256448262147,0.115079541608226,"Kerguelen",1.00825,"F"
"ct109-188-14.ct109-188-14.3747","ct109-188-14",2015-03-07 14:19:59,27,106.288376302969,-65.0255783728122,0,-27.2097079341953,0.115936892019419,"Kerguelen",1.0135,"F"
"ct109-188-14.ct109-188-14.3748","ct109-188-14",2015-03-07 20:19:59,27.25,106.42568382622,-65.0319645231008,0,-27.0929402684697,0.116767665725576,"Kerguelen",1.0205,"F"
"ct109-188-14.ct109-188-14.3749","ct109-188-14",2015-03-08 02:19:59,27.5,106.42418819861,-65.1193758902023,0,-26.9753681023696,0.117572166100099,"Kerguelen",1.01775,"F"
"ct109-188-14.ct109-188-14.3750","ct109-188-14",2015-03-08 08:19:59,27.75,106.462230095055,-65.2090559047617,1,-26.8570166836082,0.118351418761464,"Kerguelen",1.02,"F"
"ct109-188-14.ct109-188-14.3751","ct109-188-14",2015-03-08 14:19:59,28,106.589457870311,-65.2730911151011,1,-26.7379109386974,0.11910574491078,"Kerguelen",1.02625,"F"
"ct109-188-14.ct109-188-14.3752","ct109-188-14",2015-03-08 20:19:59,28.25,106.602343940728,-65.3138900459479,1,-26.6180757314768,0.119835207220614,"Kerguelen",1.03175,"F"
"ct109-188-14.ct109-188-14.3753","ct109-188-14",2015-03-09 02:19:59,28.5,106.694025826061,-65.3303331296557,1,-26.4975358706654,0.120539860811369,"Kerguelen",1.03225,"F"
"ct109-188-14.ct109-188-14.3754","ct109-188-14",2015-03-09 08:19:59,28.75,106.985379407774,-65.3602859808247,1,-26.3763161177097,0.121219752955681,"Kerguelen",1.04925,"F"
"ct109-188-14.ct109-188-14.3755","ct109-188-14",2015-03-09 14:19:59,29,107.210952535309,-65.4000019235211,1,-26.254441194928,0.121874922781751,"Kerguelen",1.34775,"F"
"ct109-188-14.ct109-188-14.3756","ct109-188-14",2015-03-09 20:19:59,29.25,107.10160093871,-65.4006224280917,1,-26.1319357922264,0.122505402701556,"Kerguelen",1.31,"F"
"ct109-188-14.ct109-188-14.3757","ct109-188-14",2015-03-10 02:19:59,29.5,107.135313717658,-65.4119294973913,1,-26.0088228541815,0.123112938044917,"Kerguelen",1.163,"F"
"ct109-188-14.ct109-188-14.3758","ct109-188-14",2015-03-10 08:19:59,29.75,107.382028709395,-65.4883861064519,1,-25.8851203369967,0.123702517184787,"Kerguelen",1.1045,"F"
"ct109-188-14.ct109-188-14.3759","ct109-188-14",2015-03-10 14:19:59,30,107.569341195342,-65.4686198006174,1,-25.7608452303507,0.12427510664596,"Kerguelen",1.0165,"F"
"ct109-188-14.ct109-188-14.3760","ct109-188-14",2015-03-10 20:19:59,30.25,107.760342451014,-65.4341943585019,1,-25.6360125050384,0.12483272531239,"Kerguelen",1.00175,"F"
"ct109-188-14.ct109-188-14.3761","ct109-188-14",2015-03-11 02:19:59,30.5,108.036662525815,-65.4948632594381,1,-25.5106340148717,0.125378490166661,"Kerguelen",1,"F"
"ct109-188-14.ct109-188-14.3762","ct109-188-14",2015-03-11 08:19:59,30.75,108.350427045756,-65.5558834953316,1,-25.3847212830213,0.125912731850353,"Kerguelen",1,"F"
"ct109-188-14.ct109-188-14.3763","ct109-188-14",2015-03-11 14:19:59,31,108.707663098527,-65.5853278195058,1,-25.2582857681504,0.126435514870965,"Kerguelen",1.00175,"F"
"ct109-188-14.ct109-188-14.3764","ct109-188-14",2015-03-11 20:19:59,31.25,108.890337105117,-65.5687881641372,1,-25.1313388681268,0.126946900023595,"Kerguelen",1.00075,"F"
"ct109-188-14.ct109-188-14.3765","ct109-188-14",2015-03-12 02:19:59,31.5,109.13859249818,-65.541730400621,1,-25.0038919238454,0.127446944281406,"Kerguelen",1.00425,"F"
"ct109-188-14.ct109-188-14.3766","ct109-188-14",2015-03-12 08:19:59,31.75,109.395904918717,-65.5160156557797,1,-24.875956295926,0.12793562791939,"Kerguelen",1.02875,"F"
"ct109-188-14.ct109-188-14.3767","ct109-188-14",2015-03-12 14:19:59,32,109.641208407098,-65.5126879575561,1,-24.7475463267811,0.128409969144919,"Kerguelen",1.3975,"F"
"ct109-188-14.ct109-188-14.3768","ct109-188-14",2015-03-12 20:19:59,32.25,109.719360954693,-65.4687824683801,1,-24.6186804003013,0.128865926479721,"Kerguelen",1.678,"F"
"ct109-188-14.ct109-188-14.3769","ct109-188-14",2015-03-13 02:19:59,32.5,109.487900119176,-65.4115258836011,1,-24.4893772032914,0.129303197009986,"Kerguelen",1.73825,"F"
"ct109-188-14.ct109-188-14.3770","ct109-188-14",2015-03-13 08:19:59,32.75,109.405079832582,-65.3619198025303,1,-24.3596554522216,0.129721751069747,"Kerguelen",1.801,"F"
"ct109-188-14.ct109-188-14.3771","ct109-188-14",2015-03-13 14:19:59,33,109.527774010765,-65.3125604782822,1,-24.2295339022236,0.130121549998,"Kerguelen",1.8315,"F"
"ct109-188-14.ct109-188-14.3772","ct109-188-14",2015-03-13 20:19:59,33.25,109.458709106131,-65.3482827143749,1,-24.0990313563405,0.130502545883093,"Kerguelen",1.80125,"F"
"ct109-188-14.ct109-188-14.3773","ct109-188-14",2015-03-14 02:19:59,33.5,109.340260288948,-65.3562283313049,1,-23.9681666750445,0.130864681296017,"Kerguelen",1.78425,"F"
"ct109-188-14.ct109-188-14.3774","ct109-188-14",2015-03-14 08:19:59,33.75,109.270107654532,-65.3597118879866,1,-23.8369601232095,0.13120655183497,"Kerguelen",1.77075,"F"
"ct109-188-14.ct109-188-14.3775","ct109-188-14",2015-03-14 14:19:59,34,109.201001001903,-65.3327543434191,1,-23.7054377240828,0.131522399126702,"Kerguelen",1.763,"F"
"ct109-188-14.ct109-188-14.3776","ct109-188-14",2015-03-14 20:19:59,34.25,109.169963235017,-65.2959869024923,0,-23.5736271584042,0.131810565678653,"Kerguelen",1.753,"F"
"ct109-188-14.ct109-188-14.3777","ct109-188-14",2015-03-15 02:19:59,34.5,109.160718671292,-65.2628528635989,0,-23.4415562922896,0.132070866114559,"Kerguelen",1.74975,"F"
"ct109-188-14.ct109-188-14.3778","ct109-188-14",2015-03-15 08:19:59,34.75,109.156672240869,-65.1740204499416,0,-23.3092531934716,0.132303098817974,"Kerguelen",1.7635,"F"
"ct109-188-14.ct109-188-14.3779","ct109-188-14",2015-03-15 14:19:59,35,109.124424839984,-65.2395260881116,0,-23.1767446449688,0.132508548502891,"Kerguelen",1.6845,"F"
"ct109-188-14.ct109-188-14.3780","ct109-188-14",2015-03-15 20:19:59,35.25,109.125076377521,-65.2546844082971,0,-23.0440492157575,0.132695429211235,"Kerguelen",1.50725,"F"
"ct109-188-14.ct109-188-14.3781","ct109-188-14",2015-03-16 02:19:59,35.5,109.071311215425,-65.253755289727,0,-22.9111826799679,0.132866535789672,"Kerguelen",1.278,"F"
"ct109-188-14.ct109-188-14.3782","ct109-188-14",2015-03-16 08:19:59,35.75,108.820172557582,-65.2993295181448,0,-22.7781609426548,0.13302173731303,"Kerguelen",1.18675,"F"
"ct109-188-14.ct109-188-14.3783","ct109-188-14",2015-03-16 14:19:59,36,108.709919290532,-65.3624556976495,1,-22.6450024668962,0.133158475758596,"Kerguelen",1.13575,"F"
"ct109-188-14.ct109-188-14.3784","ct109-188-14",2015-03-16 20:19:59,36.25,108.61112822086,-65.4169671111547,1,-22.511731542208,0.133270924688189,"Kerguelen",1.1215,"F"
"ct109-188-14.ct109-188-14.3785","ct109-188-14",2015-03-17 02:19:59,36.5,108.426660343332,-65.4655390334621,1,-22.378373513018,0.133358029190014,"Kerguelen",1.13275,"F"
"ct109-188-14.ct109-188-14.3786","ct109-188-14",2015-03-17 08:19:59,36.75,108.390736804262,-65.4594752664625,1,-22.2449525787508,0.133420934267175,"Kerguelen",1.12375,"F"
"ct109-188-14.ct109-188-14.3787","ct109-188-14",2015-03-17 14:19:59,37,108.294776212288,-65.4610094376516,1,-22.1114881698882,0.133464408862691,"Kerguelen",1.115,"F"
"ct109-188-14.ct109-188-14.3788","ct109-188-14",2015-03-17 20:19:59,37.25,108.140596554238,-65.4716283456902,1,-21.9780043793268,0.133483790561317,"Kerguelen",1.11825,"F"
"ct109-188-14.ct109-188-14.3789","ct109-188-14",2015-03-18 02:19:59,37.5,108.12508428688,-65.5426267579259,1,-21.8445271236132,0.133477255713602,"Kerguelen",1.11275,"F"
"ct109-188-14.ct109-188-14.3790","ct109-188-14",2015-03-18 08:19:59,37.75,108.326248424052,-65.5334971706628,1,-21.7110826542575,0.133444469355742,"Kerguelen",1.00875,"F"
"ct109-188-14.ct109-188-14.3791","ct109-188-14",2015-03-18 14:19:59,38,108.575997199835,-65.5280479169821,1,-21.5776975757417,0.133385078515766,"Kerguelen",1.00025,"F"
"ct109-188-14.ct109-188-14.3792","ct109-188-14",2015-03-18 20:19:59,38.25,108.911968923735,-65.4723389985907,1,-21.4443988548436,0.133298720898128,"Kerguelen",1.01325,"F"
"ct109-188-14.ct109-188-14.3793","ct109-188-14",2015-03-19 02:19:59,38.5,109.158439950538,-65.4534289772095,1,-21.3112135980518,0.133185256791837,"Kerguelen",1.038,"F"
"ct109-188-14.ct109-188-14.3794","ct109-188-14",2015-03-19 08:19:59,38.75,109.371066972152,-65.4584584162532,1,-21.1781690408541,0.133044557197681,"Kerguelen",1.084,"F"
"ct109-188-14.ct109-188-14.3795","ct109-188-14",2015-03-19 14:19:59,39,109.543692982954,-65.4687968986371,1,-21.045292825492,0.132876215362063,"Kerguelen",1.2325,"F"
"ct109-188-14.ct109-188-14.3796","ct109-188-14",2015-03-19 20:19:59,39.25,109.566427777405,-65.4972203996324,1,-20.9126130344522,0.132679791039811,"Kerguelen",1.3035,"F"
"ct109-188-14.ct109-188-14.3797","ct109-188-14",2015-03-20 02:19:59,39.5,109.494290524434,-65.5451296029624,1,-20.7801580893671,0.132454945085153,"Kerguelen",1.37575,"F"
"ct109-188-14.ct109-188-14.3798","ct109-188-14",2015-03-20 08:19:59,39.75,109.549393774443,-65.5642999508574,1,-20.6479512310027,0.132206858364392,"Kerguelen",1.40675,"F"
"ct109-188-14.ct109-188-14.3799","ct109-188-14",2015-03-20 14:19:59,40,109.663473807964,-65.6220015772432,1,-20.516008048813,0.131943182189703,"Kerguelen",1.46975,"F"
"ct109-188-14.ct109-188-14.3800","ct109-188-14",2015-03-20 20:19:59,40.25,109.557709193622,-65.6028926544147,1,-20.3843419998393,0.131666048973664,"Kerguelen",1.43775,"F"
"ct109-188-14.ct109-188-14.3801","ct109-188-14",2015-03-21 02:19:59,40.5,109.414102178005,-65.5661605059445,1,-20.2529650640921,0.131376935747216,"Kerguelen",1.43025,"F"
"ct109-188-14.ct109-188-14.3802","ct109-188-14",2015-03-21 08:19:59,40.75,109.202878559378,-65.5612012926621,1,-20.121889420514,0.131075643578055,"Kerguelen",1.46725,"F"
"ct109-188-14.ct109-188-14.3803","ct109-188-14",2015-03-21 14:19:59,41,109.10334134703,-65.557535338703,1,-19.991126917783,0.13076250273103,"Kerguelen",1.506,"F"
"ct109-188-14.ct109-188-14.3804","ct109-188-14",2015-03-21 20:19:59,41.25,109.099532837853,-65.5553234741459,1,-19.8606852797655,0.130441638017498,"Kerguelen",1.519,"F"
"ct109-188-14.ct109-188-14.3805","ct109-188-14",2015-03-22 02:19:59,41.5,109.143551564919,-65.5308429269606,1,-19.7305672469765,0.130118032788951,"Kerguelen",1.5295,"F"
"ct109-188-14.ct109-188-14.3806","ct109-188-14",2015-03-22 08:19:59,41.75,109.117835139605,-65.5397346612287,1,-19.6007716254897,0.12979562148682,"Kerguelen",1.53325,"F"
"ct109-188-14.ct109-188-14.3807","ct109-188-14",2015-03-22 14:19:59,42,109.130719150256,-65.5648280740595,1,-19.4713018750674,0.129469750422301,"Kerguelen",1.5295,"F"
"ct109-188-14.ct109-188-14.3808","ct109-188-14",2015-03-22 20:19:59,42.25,109.211271208525,-65.547708924188,1,-19.3421575671333,0.129144307934145,"Kerguelen",1.523,"F"
"ct109-188-14.ct109-188-14.3809","ct109-188-14",2015-03-23 02:19:59,42.5,109.274740555224,-65.5501743308509,1,-19.2133259158943,0.12883165123902,"Kerguelen",1.51375,"F"
"ct109-188-14.ct109-188-14.3810","ct109-188-14",2015-03-23 08:19:59,42.75,109.285376934361,-65.5655465428688,1,-19.0847937097266,0.128532206167661,"Kerguelen",1.4985,"F"
"ct109-188-14.ct109-188-14.3811","ct109-188-14",2015-03-23 14:19:59,43,109.323513176112,-65.559005546914,1,-18.9565510212604,0.128242688466224,"Kerguelen",1.47425,"F"
"ct109-188-14.ct109-188-14.3812","ct109-188-14",2015-03-23 20:19:59,43.25,109.347639687445,-65.620480299862,1,-18.8286040763279,0.127946944932522,"Kerguelen",1.44475,"F"
"ct109-188-14.ct109-188-14.3813","ct109-188-14",2015-03-24 02:19:59,43.5,109.342689077073,-65.6350953319283,1,-18.700964112944,0.127639963383863,"Kerguelen",1.39825,"F"
"ct109-188-14.ct109-188-14.3814","ct109-188-14",2015-03-24 08:19:59,43.75,109.256352183426,-65.5863312917022,1,-18.5736426595207,0.12732145342326,"Kerguelen",1.333,"F"
"ct109-188-14.ct109-188-14.3815","ct109-188-14",2015-03-24 14:19:59,44,109.201771350333,-65.5520032490261,1,-18.4466515439408,0.126991115579944,"Kerguelen",1.28375,"F"
"ct109-188-14.ct109-188-14.3816","ct109-188-14",2015-03-24 20:19:59,44.25,109.122501988779,-65.5523198884274,1,-18.3200029035714,0.126648640369348,"Kerguelen",1.23575,"F"
"ct109-188-14.ct109-188-14.3817","ct109-188-14",2015-03-25 02:19:59,44.5,109.146765039106,-65.5391011594431,1,-18.1937091955221,0.126293708049324,"Kerguelen",1.13575,"F"
"ct109-188-14.ct109-188-14.3818","ct109-188-14",2015-03-25 08:19:59,44.75,109.234188414851,-65.4834372381926,1,-18.0677832071488,0.125925988373274,"Kerguelen",1.0615,"F"
"ct109-188-14.ct109-188-14.3819","ct109-188-14",2015-03-25 14:19:59,45,109.392904004922,-65.3990102295644,1,-17.9422387917425,0.12554441540632,"Kerguelen",1.06075,"F"
"ct109-188-14.ct109-188-14.3820","ct109-188-14",2015-03-25 20:19:59,45.25,109.547352805719,-65.3362754516259,1,-17.8171006038469,0.125138187895626,"Kerguelen",1.08375,"F"
"ct109-188-14.ct109-188-14.3821","ct109-188-14",2015-03-26 02:19:59,45.5,109.60469252039,-65.3293844449742,1,-17.6924017174496,0.12469888639727,"Kerguelen",1.0845,"F"
"ct109-188-14.ct109-188-14.3822","ct109-188-14",2015-03-26 08:19:59,45.75,109.731372688614,-65.3440775567347,1,-17.5681714548748,0.124230262574787,"Kerguelen",1.0845,"F"
"ct109-188-14.ct109-188-14.3823","ct109-188-14",2015-03-26 14:19:59,46,109.771517070715,-65.3123073911235,1,-17.4444085884053,0.123762866469554,"Kerguelen",1.077,"F"
"ct109-188-14.ct109-188-14.3824","ct109-188-14",2015-03-26 20:19:59,46.25,109.858450752355,-65.3405300538044,1,-17.321102780751,0.123305807654311,"Kerguelen",1.06375,"F"
"ct109-188-14.ct109-188-14.3825","ct109-188-14",2015-03-27 02:19:59,46.5,109.962925831978,-65.4080022139461,1,-17.1982478116496,0.12285496910136,"Kerguelen",1.0635,"F"
"ct109-188-14.ct109-188-14.3826","ct109-188-14",2015-03-27 08:19:59,46.75,110.085021308604,-65.4361326536108,1,-17.0758366503948,0.122411161254793,"Kerguelen",1.0665,"F"
"ct109-188-14.ct109-188-14.3827","ct109-188-14",2015-03-27 14:19:59,47,109.998162370105,-65.4272673288945,1,-16.9538594006978,0.121977249697003,"Kerguelen",1.031,"F"
"ct109-188-14.ct109-188-14.3828","ct109-188-14",2015-03-27 20:19:59,47.25,109.715992282468,-65.4374436860775,1,-16.8323055881293,0.121553812568492,"Kerguelen",1.028,"F"
"ct109-188-14.ct109-188-14.3829","ct109-188-14",2015-03-28 02:19:59,47.5,109.619144422177,-65.3495428318247,1,-16.711164624192,0.121140963937363,"Kerguelen",1.0005,"F"
"ct109-188-14.ct109-188-14.3830","ct109-188-14",2015-03-28 08:19:59,47.75,109.643622498653,-65.1834447899133,0,-16.5904250069458,0.120739617246202,"Kerguelen",1,"F"
"ct109-188-14.ct109-188-14.3831","ct109-188-14",2015-03-28 14:19:59,48,109.75966421192,-65.0733734985694,0,-16.4700582748498,0.120366732095936,"Kerguelen",1,"F"
"ct109-188-14.ct109-188-14.3832","ct109-188-14",2015-03-28 20:19:59,48.25,110.034420899591,-65.0243041055629,0,-16.3500224823907,0.120035792459119,"Kerguelen",1,"F"
"ct109-188-14.ct109-188-14.3833","ct109-188-14",2015-03-29 02:19:59,48.5,110.206689012767,-64.9835713228424,0,-16.2302752893305,0.119747193060243,"Kerguelen",1,"F"
"ct109-188-14.ct109-188-14.3834","ct109-188-14",2015-03-29 08:19:59,48.75,110.588464504768,-64.9540039779481,0,-16.1107735127892,0.119501776541214,"Kerguelen",1,"F"
"ct109-188-14.ct109-188-14.3835","ct109-188-14",2015-03-29 14:19:59,49,111.006093048775,-65.0166783404761,0,-15.9914730914479,0.119300421341303,"Kerguelen",1,"F"
"ct109-188-14.ct109-188-14.3836","ct109-188-14",2015-03-29 20:19:59,49.25,111.446101111655,-65.034185549967,0,-15.8723290476704,0.119144043777519,"Kerguelen",1,"F"
"ct109-188-14.ct109-188-14.3837","ct109-188-14",2015-03-30 02:19:59,49.5,111.834746421812,-65.0580289369289,0,-15.7532954473513,0.119033600319129,"Kerguelen",1.001,"F"
"ct109-188-14.ct109-188-14.3838","ct109-188-14",2015-03-30 08:19:59,49.75,112.108692617011,-65.0528677821905,0,-15.6343253572473,0.118970090103993,"Kerguelen",1.00375,"F"
"ct109-188-14.ct109-188-14.3839","ct109-188-14",2015-03-30 14:19:59,50,112.208261254828,-65.1454868112321,0,-15.5153707995746,0.11895455767266,"Kerguelen",1.00075,"F"
"ct109-188-14.ct109-188-14.3840","ct109-188-14",2015-03-30 20:19:59,50.25,112.063395021554,-65.3195191439472,1,-15.3963827035896,0.118988095985023,"Kerguelen",1.00075,"F"
"ct109-188-14.ct109-188-14.3841","ct109-188-14",2015-03-31 02:19:59,50.5,111.871805046997,-65.3961669591525,1,-15.2773108538623,0.119071849727267,"Kerguelen",1.0005,"F"
"ct109-188-14.ct109-188-14.3842","ct109-188-14",2015-03-31 08:19:59,50.75,111.559546493238,-65.4063110369544,1,-15.1581038349238,0.119207018938594,"Kerguelen",1,"F"
"ct109-188-14.ct109-188-14.3843","ct109-188-14",2015-03-31 14:19:59,51,111.086161631471,-65.4034552936637,1,-15.038718885358,0.119384949565782,"Kerguelen",1,"F"
"ct109-188-14.ct109-188-14.3844","ct109-188-14",2015-03-31 20:19:59,51.25,110.696052843309,-65.4299722268203,1,-14.9191520745004,0.119566810857591,"Kerguelen",1,"F"
"ct109-188-14.ct109-188-14.3845","ct109-188-14",2015-04-01 02:19:59,51.5,110.276815899841,-65.4216962740662,1,-14.7994093917546,0.119742682745777,"Kerguelen",1,"F"
"ct109-188-14.ct109-188-14.3846","ct109-188-14",2015-04-01 08:19:59,51.75,109.896998164904,-65.3898930408445,1,-14.6794969577746,0.119912433980038,"Kerguelen",1,"F"
"ct109-188-14.ct109-188-14.3847","ct109-188-14",2015-04-01 14:19:59,52,109.556359325976,-65.3541038917345,1,-14.5594200860767,0.120076871697852,"Kerguelen",1,"F"
"ct109-188-14.ct109-188-14.3848","ct109-188-14",2015-04-01 20:19:59,52.25,109.247652003156,-65.3045408096944,0,-14.4391778798677,0.120242206208981,"Kerguelen",1,"F"
"ct109-188-14.ct109-188-14.3849","ct109-188-14",2015-04-02 02:19:59,52.5,108.973786900709,-65.3113249799696,1,-14.3187668014493,0.120411078418464,"Kerguelen",1.00225,"F"
"ct109-188-14.ct109-188-14.3850","ct109-188-14",2015-04-02 08:19:59,52.75,108.64438404432,-65.3576796313677,1,-14.1981831935679,0.120583607881361,"Kerguelen",1.029,"F"
"ct109-188-14.ct109-188-14.3851","ct109-188-14",2015-04-02 14:19:59,53,108.458599775765,-65.3638771981934,1,-14.0774232818361,0.120759911731852,"Kerguelen",1.078,"F"
"ct109-188-14.ct109-188-14.3852","ct109-188-14",2015-04-02 20:19:59,53.25,108.234040217084,-65.3496185201765,1,-13.9564827518339,0.120940530002134,"Kerguelen",1.4,"F"
"ct109-188-14.ct109-188-14.3853","ct109-188-14",2015-04-03 02:19:59,53.5,108.125500507595,-65.3374318157865,1,-13.835353373549,0.121129378284968,"Kerguelen",1.7125,"F"
"ct109-188-14.ct109-188-14.3854","ct109-188-14",2015-04-03 08:19:59,53.75,108.274791467566,-65.3648037839521,1,-13.7140246530558,0.121328720493111,"Kerguelen",1.73575,"F"
"ct109-188-14.ct109-188-14.3855","ct109-188-14",2015-04-03 14:19:59,54,108.522113507764,-65.3863863899681,1,-13.5924850164152,0.121539636640686,"Kerguelen",1.88125,"F"
"ct109-188-14.ct109-188-14.3856","ct109-188-14",2015-04-03 20:19:59,54.25,108.558443930826,-65.3570955837539,1,-13.4707114373102,0.121773579104978,"Kerguelen",1.928,"F"
"ct109-188-14.ct109-188-14.3857","ct109-188-14",2015-04-04 02:19:59,54.5,108.472868777199,-65.3468196724758,1,-13.3486844584606,0.122026978849574,"Kerguelen",1.93975,"F"
"ct109-188-14.ct109-188-14.3858","ct109-188-14",2015-04-04 08:19:59,54.75,108.4220983514,-65.3661078812576,1,-13.2263880776735,0.122296380787085,"Kerguelen",1.9435,"F"
"ct109-188-14.ct109-188-14.3859","ct109-188-14",2015-04-04 14:19:59,55,108.4101022342,-65.3197589103056,1,-13.1038072192049,0.122580858468652,"Kerguelen",1.9445,"F"
"ct109-188-14.ct109-188-14.3860","ct109-188-14",2015-04-04 20:19:59,55.25,108.383343730557,-65.2722573596049,0,-12.9809554567925,0.122851762412421,"Kerguelen",1.94975,"F"
"ct109-188-14.ct109-188-14.3861","ct109-188-14",2015-04-05 02:19:59,55.5,108.43490352623,-65.2136004553003,0,-12.8578829820877,0.123072474704783,"Kerguelen",1.9655,"F"
"ct109-188-14.ct109-188-14.3862","ct109-188-14",2015-04-05 08:19:59,55.75,108.373536833631,-65.1994548893321,0,-12.7346464174892,0.12323656459842,"Kerguelen",1.97225,"F"
"ct109-188-14.ct109-188-14.3863","ct109-188-14",2015-04-05 14:19:59,56,108.390645396421,-65.1875968963905,0,-12.6113127412731,0.12333367621612,"Kerguelen",1.9795,"F"
"ct109-188-14.ct109-188-14.3864","ct109-188-14",2015-04-05 20:19:59,56.25,108.521373060868,-65.2306048416915,0,-12.487963975872,0.123348765401135,"Kerguelen",1.98525,"F"
"ct109-188-14.ct109-188-14.3865","ct109-188-14",2015-04-06 02:19:59,56.5,108.554227833562,-65.239611291113,0,-12.3646928166223,0.123271159249666,"Kerguelen",1.98825,"F"
"ct109-188-14.ct109-188-14.3866","ct109-188-14",2015-04-06 08:19:59,56.75,108.54553153788,-65.2083574215079,0,-12.2415953447658,0.123097471856506,"Kerguelen",1.99075,"F"
"ct109-188-14.ct109-188-14.3867","ct109-188-14",2015-04-06 14:19:59,57,108.643061109545,-65.1957045665226,0,-12.1187701124115,0.122825232354315,"Kerguelen",1.99275,"F"
"ct109-188-14.ct109-188-14.3868","ct109-188-14",2015-04-06 20:19:59,57.25,108.637292153695,-65.2294391077172,0,-11.9962935714111,0.122476541000431,"Kerguelen",1.992,"F"
"ct109-188-14.ct109-188-14.3869","ct109-188-14",2015-04-07 02:19:59,57.5,108.612047028445,-65.2575212578457,0,-11.8742164874968,0.122077083914235,"Kerguelen",1.9925,"F"
"ct109-188-14.ct109-188-14.3870","ct109-188-14",2015-04-07 08:19:59,57.75,108.494747493008,-65.1964204462646,0,-11.7525900040778,0.121626483419036,"Kerguelen",1.991,"F"
"ct109-188-14.ct109-188-14.3871","ct109-188-14",2015-04-07 14:19:59,58,108.491930703138,-65.1520579742059,0,-11.6314565077488,0.121133496328998,"Kerguelen",1.9885,"F"
"ct109-188-14.ct109-188-14.3872","ct109-188-14",2015-04-07 20:19:59,58.25,108.425608870558,-65.1370615316891,0,-11.5108373687431,0.12061913900575,"Kerguelen",1.98775,"F"
"ct109-188-14.ct109-188-14.3873","ct109-188-14",2015-04-08 02:19:59,58.5,108.392069357667,-65.1034672395177,0,-11.390751974014,0.120085394729046,"Kerguelen",1.98975,"F"
"ct109-188-14.ct109-188-14.3874","ct109-188-14",2015-04-08 08:19:59,58.75,108.257551707569,-65.0932429865539,0,-11.2712205409378,0.119531433076221,"Kerguelen",1.991,"F"
"ct109-188-14.ct109-188-14.3875","ct109-188-14",2015-04-08 14:19:59,59,108.096854293454,-65.1136713662939,0,-11.1522641527965,0.11895638814131,"Kerguelen",1.9985,"F"
"ct109-188-14.ct109-188-14.3876","ct109-188-14",2015-04-08 20:19:59,59.25,108.21835048182,-65.096413270063,0,-11.0339047955611,0.118359357235417,"Kerguelen",1.9985,"F"
"ct109-188-14.ct109-188-14.3877","ct109-188-14",2015-04-09 02:19:59,59.5,108.292819128963,-64.9975367298004,0,-10.9161653959391,0.117739399621919,"Kerguelen",1.9995,"F"
"ct109-188-14.ct109-188-14.3878","ct109-188-14",2015-04-09 08:19:59,59.75,108.214490382906,-65.1132320073694,0,-10.7990698607163,0.117095535222811,"Kerguelen",1.99125,"F"
"ct109-188-14.ct109-188-14.3879","ct109-188-14",2015-04-09 14:19:59,60,108.256751560278,-65.1268960817405,0,-10.6826433147281,0.116426545988217,"Kerguelen",1.9275,"F"
"ct109-939-14.ct109-939-14.4754","ct109-939-14",2015-01-13 23:15:47,0.25,69.8031242288991,-61.2946805691586,0,-30.135706551312,0.0137454486726585,"Kerguelen",1,"M"
"ct109-939-14.ct109-939-14.4755","ct109-939-14",2015-01-14 05:15:47,0.5,69.7888693886737,-61.5069762390322,0,-30.1219623980786,0.0137441532333582,"Kerguelen",1,"M"
"ct109-939-14.ct109-939-14.4756","ct109-939-14",2015-01-14 11:15:47,0.75,69.7157039221948,-61.7578520210285,0,-30.1082210921827,0.0137413058959313,"Kerguelen",1,"M"
"ct109-939-14.ct109-939-14.4757","ct109-939-14",2015-01-14 17:15:47,1,69.7206189275061,-62.0373255996461,0,-30.0944841856878,0.0137369064949489,"Kerguelen",1,"M"
"ct109-939-14.ct109-939-14.4758","ct109-939-14",2015-01-14 23:15:47,1.25,69.7156477192525,-62.2297935939068,0,-30.080752319264,0.0137318664237218,"Kerguelen",1,"M"
"ct109-939-14.ct109-939-14.4759","ct109-939-14",2015-01-15 05:15:47,1.5,69.7719582880036,-62.4606286630829,0,-30.0670194631563,0.0137328561077177,"Kerguelen",1,"M"
"ct109-939-14.ct109-939-14.4760","ct109-939-14",2015-01-15 11:15:47,1.75,69.7723232490707,-62.7113811192122,0,-30.0532766230386,0.0137428401177309,"Kerguelen",1,"M"
"ct109-939-14.ct109-939-14.4761","ct109-939-14",2015-01-15 17:15:47,2,69.7911476079091,-62.9981880659978,0,-30.0395147324578,0.0137618905808046,"Kerguelen",1,"M"
"ct109-939-14.ct109-939-14.4762","ct109-939-14",2015-01-15 23:15:47,2.25,69.796900522596,-63.2640261987476,0,-30.0257237176507,0.0137910148071074,"Kerguelen",1,"M"
"ct109-939-14.ct109-939-14.4763","ct109-939-14",2015-01-16 05:15:47,2.5,69.7810219614223,-63.4588155762754,0,-30.0118926485947,0.0138310690559751,"Kerguelen",1,"M"
"ct109-939-14.ct109-939-14.4764","ct109-939-14",2015-01-16 11:15:47,2.75,69.8178956710991,-63.7162807201494,0,-29.9980105667093,0.013882081885408,"Kerguelen",1,"M"
"ct109-939-14.ct109-939-14.4765","ct109-939-14",2015-01-16 17:15:47,3,69.9334937732779,-64.051579347136,0,-29.9840665119836,0.013944054725662,"Kerguelen",1,"M"
"ct109-939-14.ct109-939-14.4766","ct109-939-14",2015-01-16 23:15:47,3.25,69.7348445875684,-64.3293267843033,0,-29.9700495229141,0.0140169890694986,"Kerguelen",1,"M"
"ct109-939-14.ct109-939-14.4767","ct109-939-14",2015-01-17 05:15:47,3.5,69.4287348891703,-64.6733978506359,0,-29.9559486364389,0.0141008864751935,"Kerguelen",1,"M"
"ct109-939-14.ct109-939-14.4768","ct109-939-14",2015-01-17 11:15:47,3.75,69.418652222301,-64.9540778092926,0,-29.941752887865,0.0141957485739086,"Kerguelen",1,"M"
"ct109-939-14.ct109-939-14.4769","ct109-939-14",2015-01-17 17:15:47,4,69.5406115189234,-65.204843986841,0,-29.927451310797,0.0143015770680655,"Kerguelen",1,"M"
"ct109-939-14.ct109-939-14.4770","ct109-939-14",2015-01-17 23:15:47,4.25,69.541084515141,-65.4821488052611,0,-29.9130329370545,0.014418373742503,"Kerguelen",1,"M"
"ct109-939-14.ct109-939-14.4771","ct109-939-14",2015-01-18 05:15:47,4.5,69.3623946779407,-65.7840487217404,0,-29.8984867965887,0.0145461404657266,"Kerguelen",1,"M"
"ct109-939-14.ct109-939-14.4772","ct109-939-14",2015-01-18 11:15:47,4.75,69.1440223919651,-66.1359531351771,0,-29.8838019173917,0.0146848791970078,"Kerguelen",1,"M"
"ct109-939-14.ct109-939-14.4773","ct109-939-14",2015-01-18 17:15:47,5,68.9262734912261,-66.4366572515211,0,-29.8689673254014,0.0148345919903092,"Kerguelen",1,"M"
"ct109-939-14.ct109-939-14.4774","ct109-939-14",2015-01-18 23:15:47,5.25,68.7444354447192,-66.6434615857821,0,-29.8539720443972,0.0149952810041765,"Kerguelen",1,"M"
"ct109-939-14.ct109-939-14.4775","ct109-939-14",2015-01-19 05:15:47,5.5,68.6024385274,-66.8470646919392,0,-29.8388050958953,0.0151669485019545,"Kerguelen",1,"M"
"ct109-939-14.ct109-939-14.4776","ct109-939-14",2015-01-19 11:15:47,5.75,68.547259263196,-67.0649591032027,1,-29.8234554990313,0.0153495968640005,"Kerguelen",1,"M"
"ct109-939-14.ct109-939-14.4777","ct109-939-14",2015-01-19 17:15:47,6,68.505406971698,-67.2523850000476,1,-29.8079122704386,0.0155432285926738,"Kerguelen",1.002,"M"
"ct109-939-14.ct109-939-14.4778","ct109-939-14",2015-01-19 23:15:47,6.25,68.5881251767178,-67.3846249535585,1,-29.7921644241191,0.0157478463195193,"Kerguelen",1.06125,"M"
"ct109-939-14.ct109-939-14.4779","ct109-939-14",2015-01-20 05:15:47,6.5,68.540710638675,-67.4211645629071,1,-29.7762009713059,0.0159634528131669,"Kerguelen",1.05725,"M"
"ct109-939-14.ct109-939-14.4780","ct109-939-14",2015-01-20 11:15:47,6.75,68.4066543712216,-67.4144602955814,1,-29.7600109203157,0.0161900509902169,"Kerguelen",1.053,"M"
"ct109-939-14.ct109-939-14.4781","ct109-939-14",2015-01-20 17:15:47,7,68.3761517000574,-67.4443721360475,1,-29.743583276397,0.0164276439187094,"Kerguelen",1.041,"M"
"ct109-939-14.ct109-939-14.4782","ct109-939-14",2015-01-20 23:15:47,7.25,68.514004018303,-67.5743507363577,1,-29.7269070415649,0.0166762348320915,"Kerguelen",1.04,"M"
"ct109-939-14.ct109-939-14.4783","ct109-939-14",2015-01-21 05:15:47,7.5,68.5941963391093,-67.6552092084088,1,-29.7099712144278,0.0169358271371156,"Kerguelen",1.05175,"M"
"ct109-939-14.ct109-939-14.4784","ct109-939-14",2015-01-21 11:15:47,7.75,68.4440295512407,-67.6493374137834,1,-29.6927647900039,0.0172064244239323,"Kerguelen",1.00125,"M"
"ct109-939-14.ct109-939-14.4785","ct109-939-14",2015-01-21 17:15:47,8,68.088093639597,-67.6515669564753,1,-29.6752767595278,0.0174880304760483,"Kerguelen",1.00025,"M"
"ct109-939-14.ct109-939-14.4786","ct109-939-14",2015-01-21 23:15:47,8.25,67.8386793511577,-67.6842203267909,1,-29.6574961102428,0.0177806492850097,"Kerguelen",1,"M"
"ct109-939-14.ct109-939-14.4787","ct109-939-14",2015-01-22 05:15:47,8.5,67.5193764232639,-67.7606952496734,1,-29.639411825187,0.0180842850558138,"Kerguelen",1.10375,"M"
"ct109-939-14.ct109-939-14.4788","ct109-939-14",2015-01-22 11:15:47,8.75,67.4091646746671,-67.7760846171642,1,-29.6210128829616,0.0183989422254172,"Kerguelen",1.10875,"M"
"ct109-939-14.ct109-939-14.4789","ct109-939-14",2015-01-22 17:15:47,9,67.5140277369561,-67.7559826051964,1,-29.6022883662805,0.0187245166811123,"Kerguelen",1.0515,"M"
"ct109-939-14.ct109-939-14.4790","ct109-939-14",2015-01-22 23:15:47,9.25,67.7504496150465,-67.762640469795,1,-29.5832344671068,0.0190538991736267,"Kerguelen",1.042,"M"
"ct109-939-14.ct109-939-14.4791","ct109-939-14",2015-01-23 05:15:47,9.5,67.816644483987,-67.6422138706338,1,-29.5638587525866,0.0193757145202034,"Kerguelen",1.004,"M"
"ct109-939-14.ct109-939-14.4792","ct109-939-14",2015-01-23 11:15:47,9.75,68.0123859344599,-67.5415332057574,1,-29.5441680890078,0.0196906635788252,"Kerguelen",1.0005,"M"
"ct109-939-14.ct109-939-14.4793","ct109-939-14",2015-01-23 17:15:47,10,68.2638266319512,-67.5298572752121,1,-29.5241625958696,0.0200054931382532,"Kerguelen",1,"M"
"ct109-939-14.ct109-939-14.4794","ct109-939-14",2015-01-23 23:15:47,10.25,68.6348420263669,-67.6000434908695,1,-29.5038407375626,0.0203218583069931,"Kerguelen",1.0135,"M"
"ct109-939-14.ct109-939-14.4795","ct109-939-14",2015-01-24 05:15:47,10.5,68.8477852525672,-67.7550022526719,1,-29.4832009753517,0.020639762210839,"Kerguelen",1.5125,"M"
"ct109-939-14.ct109-939-14.4796","ct109-939-14",2015-01-24 11:15:47,10.75,68.9572039525559,-67.7886392016088,1,-29.4622417672737,0.020959208078053,"Kerguelen",1.6175,"M"
"ct109-939-14.ct109-939-14.4797","ct109-939-14",2015-01-24 17:15:47,11,68.9653473337978,-67.7215873035468,1,-29.4409615680323,0.021280199241408,"Kerguelen",1.631,"M"
"ct109-939-14.ct109-939-14.4798","ct109-939-14",2015-01-24 23:15:47,11.25,68.9757914134672,-67.6424547078238,1,-29.4193588288883,0.0216027391439166,"Kerguelen",1.69025,"M"
"ct109-939-14.ct109-939-14.4799","ct109-939-14",2015-01-25 05:15:47,11.5,69.0071960086818,-67.6009787183525,1,-29.3974319975522,0.0219268313361554,"Kerguelen",1.74675,"M"
"ct109-939-14.ct109-939-14.4800","ct109-939-14",2015-01-25 11:15:47,11.75,68.8991628212389,-67.5685500844115,1,-29.3751795180673,0.0222524794849022,"Kerguelen",1.79375,"M"
"ct109-939-14.ct109-939-14.4801","ct109-939-14",2015-01-25 17:15:47,12,68.8582874636238,-67.5233471707763,1,-29.3525998306939,0.0225796873733641,"Kerguelen",1.8535,"M"
"ct109-939-14.ct109-939-14.4802","ct109-939-14",2015-01-25 23:15:47,12.25,68.8871130500936,-67.5057373712287,1,-29.3296913717893,0.0229084589046635,"Kerguelen",1.90125,"M"
"ct109-939-14.ct109-939-14.4803","ct109-939-14",2015-01-26 05:15:47,12.5,68.9649225630977,-67.5582294665069,1,-29.3064525736846,0.0232387981046855,"Kerguelen",1.92975,"M"
"ct109-939-14.ct109-939-14.4804","ct109-939-14",2015-01-26 11:15:47,12.75,68.933397522147,-67.552576266237,1,-29.2828818645563,0.0235707091283011,"Kerguelen",1.9405,"M"
"ct109-939-14.ct109-939-14.4805","ct109-939-14",2015-01-26 17:15:47,13,68.9449647968891,-67.5447093910996,1,-29.2589777314144,0.0239041331418888,"Kerguelen",1.9485,"M"
"ct109-939-14.ct109-939-14.4806","ct109-939-14",2015-01-26 23:15:47,13.25,68.9201722448056,-67.5629464437791,1,-29.2347396767465,0.0242380546679188,"Kerguelen",1.95825,"M"
"ct109-939-14.ct109-939-14.4807","ct109-939-14",2015-01-27 05:15:47,13.5,68.897794690453,-67.5380357981805,1,-29.2101680245271,0.0245716522193684,"Kerguelen",1.9635,"M"
"ct109-939-14.ct109-939-14.4808","ct109-939-14",2015-01-27 11:15:47,13.75,68.9877199326976,-67.5565785505477,1,-29.1852631185243,0.0249049060028206,"Kerguelen",1.96575,"M"
"ct109-939-14.ct109-939-14.4809","ct109-939-14",2015-01-27 17:15:47,14,69.0206858242961,-67.545906422168,1,-29.160025298506,0.0252378200182701,"Kerguelen",1.96975,"M"
"ct109-939-14.ct109-939-14.4810","ct109-939-14",2015-01-27 23:15:47,14.25,68.9141672605698,-67.5632847366853,1,-29.1344549001476,0.0255703983583766,"Kerguelen",1.971,"M"
"ct109-939-14.ct109-939-14.4811","ct109-939-14",2015-01-28 05:15:47,14.5,68.9079435933678,-67.5664844180955,1,-29.1085522549435,0.0259026452041289,"Kerguelen",1.9695,"M"
"ct109-939-14.ct109-939-14.4812","ct109-939-14",2015-01-28 11:15:47,14.75,68.7555611680283,-67.5205121042961,1,-29.0823176901125,0.0262345648310014,"Kerguelen",1.97325,"M"
"ct109-939-14.ct109-939-14.4813","ct109-939-14",2015-01-28 17:15:47,15,68.8166969664608,-67.6437529210218,1,-29.0557515285044,0.0265661616080659,"Kerguelen",1.885,"M"
"ct109-939-14.ct109-939-14.4814","ct109-939-14",2015-01-28 23:15:47,15.25,68.7363200791225,-67.8032870734529,1,-29.0288540885047,0.026897439999729,"Kerguelen",1.979,"M"
"ct109-939-14.ct109-939-14.4815","ct109-939-14",2015-01-29 05:15:47,15.5,68.7681459741137,-67.8458284885553,1,-29.0016256839384,0.027228404566354,"Kerguelen",1.9915,"M"
"ct109-939-14.ct109-939-14.4816","ct109-939-14",2015-01-29 11:15:47,15.75,69.0901326588878,-67.8028846166661,1,-28.9740666239702,0.0275590599681186,"Kerguelen",1.99775,"M"
"ct109-939-14.ct109-939-14.4817","ct109-939-14",2015-01-29 17:15:47,16,68.9521485145803,-67.7702462976306,1,-28.9461772130092,0.0278894109610406,"Kerguelen",1.98025,"M"
"ct109-939-14.ct109-939-14.4818","ct109-939-14",2015-01-29 23:15:47,16.25,68.8415568352192,-67.7259941744937,1,-28.917957750605,0.028219462404161,"Kerguelen",1.97425,"M"
"ct109-939-14.ct109-939-14.4819","ct109-939-14",2015-01-30 05:15:47,16.5,68.6328349327669,-67.6923150056174,1,-28.8894085313481,0.0285492192569681,"Kerguelen",1.9875,"M"
"ct109-939-14.ct109-939-14.4820","ct109-939-14",2015-01-30 11:15:47,16.75,68.5269769586454,-67.7697700549271,1,-28.860529844766,0.0288786865820845,"Kerguelen",1.99175,"M"
"ct109-939-14.ct109-939-14.4821","ct109-939-14",2015-01-30 17:15:47,17,68.5485532462372,-67.7469863116193,1,-28.8313219752171,0.0292078695488807,"Kerguelen",1.9945,"M"
"ct109-939-14.ct109-939-14.4822","ct109-939-14",2015-01-30 23:15:47,17.25,68.3867659982788,-67.744625997175,1,-28.8017852017886,0.0295367734284624,"Kerguelen",1.99425,"M"
"ct109-939-14.ct109-939-14.4823","ct109-939-14",2015-01-31 05:15:47,17.5,68.5232101787154,-67.7305857195357,1,-28.7719197981865,0.0298654036021861,"Kerguelen",1.99375,"M"
"ct109-939-14.ct109-939-14.4824","ct109-939-14",2015-01-31 11:15:47,17.75,68.5568604703373,-67.7331551142616,1,-28.7417260326275,0.0301937655589835,"Kerguelen",1.9945,"M"
"ct109-939-14.ct109-939-14.4825","ct109-939-14",2015-01-31 17:15:47,18,68.6472637718511,-67.7428113940402,1,-28.7112041677296,0.0305218648978867,"Kerguelen",1.997,"M"
"ct109-939-14.ct109-939-14.4826","ct109-939-14",2015-01-31 23:15:47,18.25,68.5176243951553,-67.7299899905148,1,-28.6803544604008,0.0308497073288283,"Kerguelen",1.9945,"M"
"ct109-939-14.ct109-939-14.4827","ct109-939-14",2015-02-01 05:15:47,18.5,68.6222601294976,-67.7837587200612,1,-28.6491771617235,0.0311772986772596,"Kerguelen",1.973,"M"
"ct109-939-14.ct109-939-14.4828","ct109-939-14",2015-02-01 11:15:47,18.75,68.6156767437096,-67.7067067323889,1,-28.6176725168447,0.0315046448787548,"Kerguelen",1.87075,"M"
"ct109-939-14.ct109-939-14.4829","ct109-939-14",2015-02-01 17:15:47,19,68.2633139827782,-67.7568982001697,1,-28.5858407648568,0.0318317519879374,"Kerguelen",1.34225,"M"
"ct109-939-14.ct109-939-14.4830","ct109-939-14",2015-02-01 23:15:47,19.25,68.0523303796734,-67.7639561787251,1,-28.5536821385158,0.0321586263410334,"Kerguelen",1.068,"M"
"ct109-939-14.ct109-939-14.4831","ct109-939-14",2015-02-02 05:15:47,19.5,67.8682438476618,-67.7540873756129,1,-28.5211967241247,0.0324854143911035,"Kerguelen",1.0035,"M"
"ct109-939-14.ct109-939-14.4832","ct109-939-14",2015-02-02 11:15:47,19.75,67.5875011340569,-67.7219166298968,1,-28.4883842061262,0.032812517998454,"Kerguelen",1,"M"
"ct109-939-14.ct109-939-14.4833","ct109-939-14",2015-02-02 17:15:47,20,67.3117257729071,-67.6614302662681,1,-28.4552441928181,0.0331400133080972,"Kerguelen",1,"M"
"ct109-939-14.ct109-939-14.4834","ct109-939-14",2015-02-02 23:15:47,20.25,67.0625581257594,-67.6546674647649,1,-28.4217762853607,0.0334679074573796,"Kerguelen",1.00025,"M"
"ct109-939-14.ct109-939-14.4835","ct109-939-14",2015-02-03 05:15:47,20.5,66.893334990283,-67.6596697463969,1,-28.3879800776205,0.0337962077402609,"Kerguelen",1,"M"
"ct109-939-14.ct109-939-14.4836","ct109-939-14",2015-02-03 11:15:47,20.75,66.6234261143301,-67.6610632141437,1,-28.3538551560145,0.0341249216059547,"Kerguelen",1,"M"
"ct109-939-14.ct109-939-14.4837","ct109-939-14",2015-02-03 17:15:47,21,66.4335266224229,-67.6452385958741,1,-28.3194010993509,0.0344540566635854,"Kerguelen",1.00175,"M"
"ct109-939-14.ct109-939-14.4838","ct109-939-14",2015-02-03 23:15:47,21.25,66.3032758702304,-67.5911362901308,1,-28.2846174786679,0.0347836206830487,"Kerguelen",1.005,"M"
"ct109-939-14.ct109-939-14.4839","ct109-939-14",2015-02-04 05:15:47,21.5,66.2931730117305,-67.5646754330424,1,-28.2495038570656,0.0351136216022785,"Kerguelen",1.00375,"M"
"ct109-939-14.ct109-939-14.4840","ct109-939-14",2015-02-04 11:15:47,21.75,66.1825352689837,-67.4830133803641,1,-28.2140597895426,0.0354440675229606,"Kerguelen",1.0005,"M"
"ct109-939-14.ct109-939-14.4841","ct109-939-14",2015-02-04 17:15:47,22,65.9746672301048,-67.4352990737027,1,-28.1782848228225,0.035774966720109,"Kerguelen",1.002,"M"
"ct109-939-14.ct109-939-14.4842","ct109-939-14",2015-02-04 23:15:47,22.25,65.7572978501952,-67.4383434909074,1,-28.1421784951802,0.0361063276422935,"Kerguelen",1.00225,"M"
"ct109-939-14.ct109-939-14.4843","ct109-939-14",2015-02-05 05:15:47,22.5,65.5396056366681,-67.4023774181285,1,-28.1057403362655,0.0364381589147145,"Kerguelen",1.011,"M"
"ct109-939-14.ct109-939-14.4844","ct109-939-14",2015-02-05 11:15:47,22.75,65.3238858661825,-67.3509742795127,1,-28.0689698669229,0.0367704693425841,"Kerguelen",1.2075,"M"
"ct109-939-14.ct109-939-14.4845","ct109-939-14",2015-02-05 17:15:47,23,65.1839229101835,-67.3016909393774,1,-28.0318665990064,0.0371032679165439,"Kerguelen",1.41225,"M"
"ct109-939-14.ct109-939-14.4846","ct109-939-14",2015-02-05 23:15:47,23.25,65.1322780594167,-67.2539006111215,1,-27.9944300351956,0.0374365638107776,"Kerguelen",1.6455,"M"
"ct109-939-14.ct109-939-14.4847","ct109-939-14",2015-02-06 05:15:47,23.5,65.0397392838961,-67.3175338168497,1,-27.956659668804,0.037770366391654,"Kerguelen",1.6965,"M"
"ct109-939-14.ct109-939-14.4848","ct109-939-14",2015-02-06 11:15:47,23.75,65.1337904069645,-67.3148780031687,1,-27.9185549835853,0.0381046852186984,"Kerguelen",1.69125,"M"
"ct109-939-14.ct109-939-14.4849","ct109-939-14",2015-02-06 17:15:47,24,65.1691849835076,-67.3194894374253,1,-27.8801154535366,0.0384395300487006,"Kerguelen",1.684,"M"
"ct109-939-14.ct109-939-14.4850","ct109-939-14",2015-02-06 23:15:47,24.25,65.0891530714125,-67.3684894453324,1,-27.8413405426982,0.0387749108383628,"Kerguelen",1.6735,"M"
"ct109-939-14.ct109-939-14.4851","ct109-939-14",2015-02-07 05:15:47,24.5,65.1933742052806,-67.4065569952377,1,-27.8022297049467,0.0391108377514604,"Kerguelen",1.628,"M"
"ct109-939-14.ct109-939-14.4852","ct109-939-14",2015-02-07 11:15:47,24.75,65.1648247157866,-67.3951265549941,1,-27.7627823837905,0.0394473211562052,"Kerguelen",1.50725,"M"
"ct109-939-14.ct109-939-14.4853","ct109-939-14",2015-02-07 17:15:47,25,65.0675208101904,-67.5074111506727,1,-27.722998012155,0.0397843716355817,"Kerguelen",1.34275,"M"
"ct109-939-14.ct109-939-14.4854","ct109-939-14",2015-02-07 23:15:47,25.25,65.0009465462604,-67.5694206434699,1,-27.6828760121673,0.0401219999876301,"Kerguelen",1.2695,"M"
"ct109-939-14.ct109-939-14.4855","ct109-939-14",2015-02-08 05:15:47,25.5,64.6953574926801,-67.6187607849285,1,-27.6424177686381,0.0404582435292733,"Kerguelen",1.27075,"M"
"ct109-939-14.ct109-939-14.4856","ct109-939-14",2015-02-08 11:15:47,25.75,64.4946005158342,-67.584181003419,1,-27.6016421617863,0.0407756068517784,"Kerguelen",1.2985,"M"
"ct109-939-14.ct109-939-14.4857","ct109-939-14",2015-02-08 17:15:47,26,64.4006160685296,-67.5703387432238,1,-27.5605527418042,0.0410894199820933,"Kerguelen",1.30975,"M"
"ct109-939-14.ct109-939-14.4858","ct109-939-14",2015-02-08 23:15:47,26.25,64.2172822829298,-67.4759767429248,1,-27.5191465540151,0.0414061877890393,"Kerguelen",1.412,"M"
"ct109-939-14.ct109-939-14.4859","ct109-939-14",2015-02-09 05:15:47,26.5,64.1634928881153,-67.3813124290607,1,-27.4774206297327,0.0417259242824541,"Kerguelen",1.76975,"M"
"ct109-939-14.ct109-939-14.4860","ct109-939-14",2015-02-09 11:15:47,26.75,64.2228297259428,-67.3782280922229,1,-27.4353724782037,0.0420481515289839,"Kerguelen",1.84525,"M"
"ct109-939-14.ct109-939-14.4861","ct109-939-14",2015-02-09 17:15:47,27,64.35441559098,-67.4082127586579,1,-27.3930014168504,0.0423710613533523,"Kerguelen",1.9395,"M"
"ct109-939-14.ct109-939-14.4862","ct109-939-14",2015-02-09 23:15:47,27.25,64.2849547371608,-67.3932185749401,1,-27.3503010777943,0.0427003390560232,"Kerguelen",1.95475,"M"
"ct109-939-14.ct109-939-14.4863","ct109-939-14",2015-02-10 05:15:47,27.5,64.3266325122914,-67.3542395997524,1,-27.3072632795676,0.043037798226736,"Kerguelen",1.9665,"M"
"ct109-939-14.ct109-939-14.4864","ct109-939-14",2015-02-10 11:15:47,27.75,64.2711642769017,-67.3902140763759,1,-27.2638805311864,0.0433827483811489,"Kerguelen",1.97075,"M"
"ct109-939-14.ct109-939-14.4865","ct109-939-14",2015-02-10 17:15:47,28,64.2143884904524,-67.3998493047473,1,-27.2201453182768,0.0437352129096735,"Kerguelen",1.9725,"M"
"ct109-939-14.ct109-939-14.4866","ct109-939-14",2015-02-10 23:15:47,28.25,64.2669056659179,-67.3926615686691,1,-27.1760501022709,0.0440952160058294,"Kerguelen",1.971,"M"
"ct109-939-14.ct109-939-14.4867","ct109-939-14",2015-02-11 05:15:47,28.5,64.2202539645703,-67.40359875719,1,-27.1315873195751,0.0444627826958199,"Kerguelen",1.9665,"M"
"ct109-939-14.ct109-939-14.4868","ct109-939-14",2015-02-11 11:15:47,28.75,64.328284120384,-67.3710148487711,1,-27.0867495326332,0.0448377869418759,"Kerguelen",1.963,"M"
"ct109-939-14.ct109-939-14.4869","ct109-939-14",2015-02-11 17:15:47,29,64.205885515341,-67.4049841202605,1,-27.0415313976573,0.0452181349758995,"Kerguelen",1.94075,"M"
"ct109-939-14.ct109-939-14.4870","ct109-939-14",2015-02-11 23:15:47,29.25,64.2383444341548,-67.406969251344,1,-26.9959291045591,0.0456022930982791,"Kerguelen",1.8895,"M"
"ct109-939-14.ct109-939-14.4871","ct109-939-14",2015-02-12 05:15:47,29.5,64.250659503536,-67.393553485927,1,-26.9499388572464,0.0459902473126383,"Kerguelen",1.834,"M"
"ct109-939-14.ct109-939-14.4872","ct109-939-14",2015-02-12 11:15:47,29.75,64.2114730396536,-67.4142173557286,1,-26.9035568370941,0.0463820201523302,"Kerguelen",1.758,"M"
"ct109-939-14.ct109-939-14.4873","ct109-939-14",2015-02-12 17:15:47,30,64.1624528704801,-67.4087831767572,1,-26.8567792022998,0.0467776347943039,"Kerguelen",1.668,"M"
"ct109-939-14.ct109-939-14.4874","ct109-939-14",2015-02-12 23:15:47,30.25,63.9851814672722,-67.462079776884,1,-26.8096020872217,0.0471771150780953,"Kerguelen",1.6185,"M"
"ct109-939-14.ct109-939-14.4875","ct109-939-14",2015-02-13 05:15:47,30.5,63.9403596159588,-67.4678978454662,1,-26.7620216016943,0.047580485527382,"Kerguelen",1.4795,"M"
"ct109-939-14.ct109-939-14.4876","ct109-939-14",2015-02-13 11:15:47,30.75,63.9751367015859,-67.418907236228,1,-26.7140338303298,0.0479877713645327,"Kerguelen",1.20425,"M"
"ct109-939-14.ct109-939-14.4877","ct109-939-14",2015-02-13 17:15:47,31,64.2885953082788,-67.4234374769157,1,-26.6656331875723,0.0484006427575179,"Kerguelen",1.02325,"M"
"ct109-939-14.ct109-939-14.4878","ct109-939-14",2015-02-13 23:15:47,31.25,64.5262551965395,-67.4770500154446,1,-26.6168027099232,0.0488304776490478,"Kerguelen",1.0095,"M"
"ct109-939-14.ct109-939-14.4879","ct109-939-14",2015-02-14 05:15:47,31.5,64.5915077211467,-67.5559790324984,1,-26.5675205918829,0.0492821180402891,"Kerguelen",1.00025,"M"
"ct109-939-14.ct109-939-14.4880","ct109-939-14",2015-02-14 11:15:47,31.75,64.836650736848,-67.6534798773287,1,-26.5177649451278,0.0497556467551397,"Kerguelen",1,"M"
"ct109-939-14.ct109-939-14.4881","ct109-939-14",2015-02-14 17:15:47,32,65.2060807747341,-67.6727256840074,1,-26.4675138124259,0.0502511327019284,"Kerguelen",1,"M"
"ct109-939-14.ct109-939-14.4882","ct109-939-14",2015-02-14 23:15:47,32.25,65.6050384960568,-67.6777682571883,1,-26.4167451645902,0.0507686478356584,"Kerguelen",1.0005,"M"
"ct109-939-14.ct109-939-14.4883","ct109-939-14",2015-02-15 05:15:47,32.5,65.8402841819411,-67.6669822039046,1,-26.3654368972681,0.0513082673221477,"Kerguelen",1,"M"
"ct109-939-14.ct109-939-14.4884","ct109-939-14",2015-02-15 11:15:47,32.75,66.2322182716732,-67.7001360795362,1,-26.3135668275666,0.0518700697014873,"Kerguelen",1,"M"
"ct109-939-14.ct109-939-14.4885","ct109-939-14",2015-02-15 17:15:47,33,66.6179817239786,-67.7623093425608,1,-26.2611126905036,0.0524541370629628,"Kerguelen",1,"M"
"ct109-939-14.ct109-939-14.4886","ct109-939-14",2015-02-15 23:15:47,33.25,67.1307017074062,-67.7412495271685,1,-26.2080521342525,0.0530605562511222,"Kerguelen",1,"M"
"ct109-939-14.ct109-939-14.4887","ct109-939-14",2015-02-16 05:15:47,33.5,67.6379124392356,-67.6905352190944,1,-26.1543613403901,0.0536907938623599,"Kerguelen",1,"M"
"ct109-939-14.ct109-939-14.4888","ct109-939-14",2015-02-16 11:15:47,33.75,68.0318459192953,-67.7681561299209,1,-26.1000122923061,0.0543490480840014,"Kerguelen",1,"M"
"ct109-939-14.ct109-939-14.4889","ct109-939-14",2015-02-16 17:15:47,34,68.343565729224,-67.8756988908812,1,-26.044976100977,0.0550361913291608,"Kerguelen",1,"M"
"ct109-939-14.ct109-939-14.4890","ct109-939-14",2015-02-16 23:15:47,34.25,68.819477799205,-67.8649212126793,1,-25.9892237575539,0.0557523434230378,"Kerguelen",1,"M"
"ct109-939-14.ct109-939-14.4891","ct109-939-14",2015-02-17 05:15:47,34.5,69.4721110262133,-67.7892975606186,1,-25.9327261274334,0.0564976301205611,"Kerguelen",1,"M"
"ct109-939-14.ct109-939-14.4892","ct109-939-14",2015-02-17 11:15:47,34.75,70.0646771384831,-67.7969466962003,1,-25.8754539439848,0.0572721834485979,"Kerguelen",1,"M"
"ct109-939-14.ct109-939-14.4893","ct109-939-14",2015-02-17 17:15:47,35,70.4164958184774,-67.8407102538451,1,-25.8173778019289,0.0580761420559128,"Kerguelen",1,"M"
"ct109-939-14.ct109-939-14.4894","ct109-939-14",2015-02-17 23:15:47,35.25,70.6860504916976,-67.9824758274773,1,-25.7584681503314,0.058909651597483,"Kerguelen",1,"M"
"ct109-939-14.ct109-939-14.4895","ct109-939-14",2015-02-18 05:15:47,35.5,71.080487976454,-68.1105487673851,1,-25.6986952852023,0.0597728651290652,"Kerguelen",1.0595,"M"
"ct109-939-14.ct109-939-14.4896","ct109-939-14",2015-02-18 11:15:47,35.75,71.1602073460037,-68.1649720970497,1,-25.638029341673,0.0606659435293533,"Kerguelen",1.027,"M"
"ct109-939-14.ct109-939-14.4897","ct109-939-14",2015-02-18 17:15:47,36,71.2298568020381,-68.3350947173511,1,-25.576440285729,0.0615890559439725,"Kerguelen",1.03275,"M"
"ct109-939-14.ct109-939-14.4898","ct109-939-14",2015-02-18 23:15:47,36.25,71.1643257007359,-68.4552566356616,1,-25.5138979054698,0.0625423802591785,"Kerguelen",1.07825,"M"
"ct109-939-14.ct109-939-14.4899","ct109-939-14",2015-02-19 05:15:47,36.5,71.1701190829637,-68.5198817375072,1,-25.4503718018759,0.0635261035938584,"Kerguelen",1.1145,"M"
"ct109-939-14.ct109-939-14.4900","ct109-939-14",2015-02-19 11:15:47,36.75,71.2578760556177,-68.6297783885349,1,-25.3858313790447,0.0645404228312496,"Kerguelen",1.311,"M"
"ct109-939-14.ct109-939-14.4901","ct109-939-14",2015-02-19 17:15:47,37,71.3833353396876,-68.6445429347134,1,-25.3202458338704,0.0655855451742737,"Kerguelen",1.39025,"M"
"ct109-939-14.ct109-939-14.4902","ct109-939-14",2015-02-19 23:15:47,37.25,71.4830877860522,-68.6356824477637,1,-25.2535841451346,0.0666616887358085,"Kerguelen",1.51725,"M"
"ct109-939-14.ct109-939-14.4903","ct109-939-14",2015-02-20 05:15:47,37.5,71.4256338266772,-68.5946766704731,1,-25.1858150619716,0.067769083162994,"Kerguelen",1.567,"M"
"ct109-939-14.ct109-939-14.4904","ct109-939-14",2015-02-20 11:15:47,37.75,71.3335592256592,-68.6101465393859,1,-25.1169064549118,0.0689086070597811,"Kerguelen",1.60075,"M"
"ct109-939-14.ct109-939-14.4905","ct109-939-14",2015-02-20 17:15:47,38,71.3892470388974,-68.6313804692984,1,-25.046821192223,0.0700852626887849,"Kerguelen",1.60675,"M"
"ct109-939-14.ct109-939-14.4906","ct109-939-14",2015-02-20 23:15:47,38.25,71.2326739853387,-68.58048041253,1,-24.9755188267467,0.07130236547635,"Kerguelen",1.572,"M"
"ct109-939-14.ct109-939-14.4907","ct109-939-14",2015-02-21 05:15:47,38.5,71.002500076796,-68.5995506156745,1,-24.9029584908354,0.0725603359112731,"Kerguelen",1.58575,"M"
"ct109-939-14.ct109-939-14.4908","ct109-939-14",2015-02-21 11:15:47,38.75,71.0358338584385,-68.6360791278769,1,-24.8290989084168,0.0738595824186117,"Kerguelen",1.31125,"M"
"ct109-939-14.ct109-939-14.4909","ct109-939-14",2015-02-21 17:15:47,39,71.4254215827468,-68.579040601037,1,-24.7538944396471,0.0752044687696685,"Kerguelen",1,"M"
"ct109-939-14.ct109-939-14.4910","ct109-939-14",2015-02-21 23:15:47,39.25,71.7467225333783,-68.4894024603948,1,-24.6772937764159,0.0766006632312105,"Kerguelen",1,"M"
"ct109-939-14.ct109-939-14.4911","ct109-939-14",2015-02-22 05:15:47,39.5,72.1616716863723,-68.4453134214839,1,-24.5992649394835,0.0780288369323978,"Kerguelen",1,"M"
"ct109-939-14.ct109-939-14.4912","ct109-939-14",2015-02-22 11:15:47,39.75,72.4804630902146,-68.4307510027549,0,-24.5197965179579,0.0794684215256497,"Kerguelen",1.00025,"M"
"ct109-939-14.ct109-939-14.4913","ct109-939-14",2015-02-22 17:15:47,40,72.7661715316942,-68.4496420489515,0,-24.4388777751531,0.0809187428047559,"Kerguelen",1,"M"
"ct109-939-14.ct109-939-14.4914","ct109-939-14",2015-02-22 23:15:47,40.25,73.0139873781842,-68.4741698441022,0,-24.3564976783534,0.0823800967997168,"Kerguelen",1.00225,"M"
"ct109-939-14.ct109-939-14.4915","ct109-939-14",2015-02-23 05:15:47,40.5,73.2793738858903,-68.5066520880912,0,-24.2726448860172,0.083852792336242,"Kerguelen",1.066,"M"
"ct109-939-14.ct109-939-14.4916","ct109-939-14",2015-02-23 11:15:47,40.75,73.4267073726798,-68.5446826475776,0,-24.1873081746715,0.0853367113457126,"Kerguelen",1.2255,"M"
"ct109-939-14.ct109-939-14.4917","ct109-939-14",2015-02-23 17:15:47,41,73.3517678468838,-68.5807795026443,0,-24.1004877281939,0.0868204464775618,"Kerguelen",1.24575,"M"
"ct109-939-14.ct109-939-14.4918","ct109-939-14",2015-02-23 23:15:47,41.25,73.2418890732171,-68.5590117384491,0,-24.0121961769448,0.0882915512491061,"Kerguelen",1.25975,"M"
"ct109-939-14.ct109-939-14.4919","ct109-939-14",2015-02-24 05:15:47,41.5,73.2327866762475,-68.6050761730566,0,-23.9224466091871,0.0897495677577437,"Kerguelen",1.243,"M"
"ct109-939-14.ct109-939-14.4920","ct109-939-14",2015-02-24 11:15:47,41.75,73.5481986319814,-68.661728998004,0,-23.8312563550343,0.091190254152787,"Kerguelen",1.2365,"M"
"ct109-939-14.ct109-939-14.4921","ct109-939-14",2015-02-24 17:15:47,42,73.7281342875293,-68.7072827668246,0,-23.738651892833,0.0926044622012567,"Kerguelen",1.25875,"M"
"ct109-939-14.ct109-939-14.4922","ct109-939-14",2015-02-24 23:15:47,42.25,73.668359006338,-68.7199569435729,0,-23.6446598302577,0.0939920625752821,"Kerguelen",1.2315,"M"
"ct109-939-14.ct109-939-14.4923","ct109-939-14",2015-02-25 05:15:47,42.5,73.6897936972627,-68.7376378168615,0,-23.5492947795182,0.0953650507395709,"Kerguelen",1.18975,"M"
"ct109-939-14.ct109-939-14.4924","ct109-939-14",2015-02-25 11:15:47,42.75,73.7970586698852,-68.7916000989603,0,-23.4525844854723,0.0967102940458181,"Kerguelen",1.159,"M"
"ct109-939-14.ct109-939-14.4925","ct109-939-14",2015-02-25 17:15:47,43,73.927796764233,-68.8277886958431,0,-23.3545580788229,0.0980264066494846,"Kerguelen",1.1445,"M"
"ct109-939-14.ct109-939-14.4926","ct109-939-14",2015-02-25 23:15:47,43.25,74.1215062731697,-68.8913903530401,0,-23.2552446142431,0.0993134645797866,"Kerguelen",1.1695,"M"
"ct109-939-14.ct109-939-14.4927","ct109-939-14",2015-02-26 05:15:47,43.5,74.1904608676094,-68.9198412771294,0,-23.1546730778839,0.100571536359179,"Kerguelen",1.17725,"M"
"ct109-939-14.ct109-939-14.4928","ct109-939-14",2015-02-26 11:15:47,43.75,74.248405951537,-68.9740761861139,1,-23.0528723952631,0.101800682620745,"Kerguelen",1.19125,"M"
"ct109-939-14.ct109-939-14.4929","ct109-939-14",2015-02-26 17:15:47,44,74.3122650702528,-69.0491182411742,1,-22.9498714395551,0.103000955707994,"Kerguelen",1.25625,"M"
"ct109-939-14.ct109-939-14.4930","ct109-939-14",2015-02-26 23:15:47,44.25,74.3352095124568,-69.0817742922073,1,-22.8456990402796,0.104172399275551,"Kerguelen",1.32675,"M"
"ct109-939-14.ct109-939-14.4931","ct109-939-14",2015-02-27 05:15:47,44.5,74.2461925785611,-69.0515833705437,1,-22.7403839924083,0.105315047871291,"Kerguelen",1.345,"M"
"ct109-939-14.ct109-939-14.4932","ct109-939-14",2015-02-27 11:15:47,44.75,74.2627887271146,-69.0518996762889,1,-22.6339550658982,0.106428926510108,"Kerguelen",1.35075,"M"
"ct109-939-14.ct109-939-14.4933","ct109-939-14",2015-02-27 17:15:47,45,74.5560617715312,-69.1167128868852,1,-22.5264410156615,0.107514050236662,"Kerguelen",1.35875,"M"
"ct109-939-14.ct109-939-14.4934","ct109-939-14",2015-02-27 23:15:47,45.25,74.5403730418949,-69.2270661201851,1,-22.4178705919791,0.108570423682453,"Kerguelen",1.28625,"M"
"ct109-939-14.ct109-939-14.4935","ct109-939-14",2015-02-28 05:15:47,45.5,74.5580511329625,-69.2562763355582,1,-22.3082725513807,0.109598040598374,"Kerguelen",1.10525,"M"
"ct109-939-14.ct109-939-14.4936","ct109-939-14",2015-02-28 11:15:47,45.75,74.7902623860374,-69.346692346893,1,-22.1976756679867,0.110596883394043,"Kerguelen",1.05125,"M"
"ct109-939-14.ct109-939-14.4937","ct109-939-14",2015-02-28 17:15:47,46,74.9621477384163,-69.3826338972369,1,-22.0861087453358,0.111566922650819,"Kerguelen",1.036,"M"
"ct109-939-14.ct109-939-14.4938","ct109-939-14",2015-02-28 23:15:47,46.25,75.178595473858,-69.3147399464081,1,-21.9736006287041,0.112508116631785,"Kerguelen",1.02775,"M"
"ct109-939-14.ct109-939-14.4939","ct109-939-14",2015-03-01 05:15:47,46.5,75.3563854812903,-69.3783003155946,1,-21.86018021793,0.113420410774107,"Kerguelen",1,"M"
"ct109-939-14.ct109-939-14.4940","ct109-939-14",2015-03-01 11:15:47,46.75,75.7134525099906,-69.3973114244896,1,-21.7458764807533,0.114303737176621,"Kerguelen",1,"M"
"ct109-939-14.ct109-939-14.4941","ct109-939-14",2015-03-01 17:15:47,47,76.0456667071722,-69.3497995741056,0,-21.6307184666908,0.115158014062572,"Kerguelen",1.001,"M"
"ct109-939-14.ct109-939-14.4942","ct109-939-14",2015-03-01 23:15:47,47.25,76.3189834696671,-69.3135315831611,0,-21.5147360858607,0.115982380830071,"Kerguelen",1.008,"M"
"ct109-939-14.ct109-939-14.4943","ct109-939-14",2015-03-02 05:15:47,47.5,76.5093797256847,-69.2793504258003,1,-21.3979623730716,0.116773712789078,"Kerguelen",1.09525,"M"
"ct109-939-14.ct109-939-14.4944","ct109-939-14",2015-03-02 11:15:47,47.75,76.6668115926507,-69.2154071799879,1,-21.2804310520635,0.117531321008069,"Kerguelen",1.427,"M"
"ct109-939-14.ct109-939-14.4945","ct109-939-14",2015-03-02 17:15:47,48,76.571222564679,-69.1756575492924,1,-21.1621736872918,0.11825736477179,"Kerguelen",1.4675,"M"
"ct109-939-14.ct109-939-14.4946","ct109-939-14",2015-03-02 23:15:47,48.25,76.3748865787015,-69.1261155274172,1,-21.043219909647,0.118953777644754,"Kerguelen",1.7025,"M"
"ct109-939-14.ct109-939-14.4947","ct109-939-14",2015-03-03 05:15:47,48.5,76.358077791078,-69.0878370156548,1,-20.9235967660309,0.119623143616099,"Kerguelen",1.79375,"M"
"ct109-939-14.ct109-939-14.4948","ct109-939-14",2015-03-03 11:15:47,48.75,76.4056761484114,-69.1114647514122,1,-20.8033390068422,0.120257759188722,"Kerguelen",1.83025,"M"
"ct109-939-14.ct109-939-14.4949","ct109-939-14",2015-03-03 17:15:47,49,76.3732702281903,-69.1420616129619,1,-20.6824846893045,0.120854317537672,"Kerguelen",1.86575,"M"
"ct109-939-14.ct109-939-14.4950","ct109-939-14",2015-03-03 23:15:47,49.25,76.3542742645485,-69.1685097945003,1,-20.5610722140422,0.121412475262309,"Kerguelen",1.913,"M"
"ct109-939-14.ct109-939-14.4951","ct109-939-14",2015-03-04 05:15:47,49.5,76.2108781864589,-69.1761318227337,1,-20.4391403495579,0.121931864484304,"Kerguelen",1.969,"M"
"ct109-939-14.ct109-939-14.4952","ct109-939-14",2015-03-04 11:15:47,49.75,76.3228350840984,-69.161943071801,1,-20.3167282589985,0.122412090559398,"Kerguelen",1.9735,"M"
"ct109-939-14.ct109-939-14.4953","ct109-939-14",2015-03-04 17:15:47,50,76.3038189698737,-69.1461773648158,1,-20.1938757217741,0.122852537224349,"Kerguelen",1.97525,"M"
"ct109-939-14.ct109-939-14.4954","ct109-939-14",2015-03-04 23:15:47,50.25,76.1736303675293,-69.171035827789,1,-20.0706292605006,0.123246461273566,"Kerguelen",1.9795,"M"
"ct109-939-14.ct109-939-14.4955","ct109-939-14",2015-03-05 05:15:47,50.5,76.1775039498424,-69.1537838930114,1,-19.947043499447,0.123585761053607,"Kerguelen",1.9815,"M"
"ct109-939-14.ct109-939-14.4956","ct109-939-14",2015-03-05 11:15:47,50.75,76.0714050058975,-69.1264919561063,1,-19.8231742291674,0.123869270279556,"Kerguelen",1.987,"M"
"ct109-939-14.ct109-939-14.4957","ct109-939-14",2015-03-05 17:15:47,51,75.9706064937234,-69.1558511999871,1,-19.6990780280339,0.124096201133564,"Kerguelen",1.99325,"M"
"ct109-939-14.ct109-939-14.4958","ct109-939-14",2015-03-05 23:15:47,51.25,76.0428099813694,-69.1836836920205,1,-19.5748138607474,0.124264167286475,"Kerguelen",1.99375,"M"
"ct109-939-14.ct109-939-14.4959","ct109-939-14",2015-03-06 05:15:47,51.5,76.0118014534298,-69.1917586444643,1,-19.4504445066574,0.124369354089968,"Kerguelen",1.9935,"M"
"ct109-939-14.ct109-939-14.4960","ct109-939-14",2015-03-06 11:15:47,51.75,75.9747212423035,-69.1635982253299,1,-19.3260333771395,0.124411129517918,"Kerguelen",1.992,"M"
"ct109-939-14.ct109-939-14.4961","ct109-939-14",2015-03-06 17:15:47,52,75.9698819902148,-69.1668205482989,1,-19.2016418111596,0.124391565979934,"Kerguelen",1.98975,"M"
"ct109-939-14.ct109-939-14.4962","ct109-939-14",2015-03-06 23:15:47,52.25,75.9057179487404,-69.1869035617285,1,-19.0773312662158,0.124310544943759,"Kerguelen",1.99125,"M"
"ct109-939-14.ct109-939-14.4963","ct109-939-14",2015-03-07 05:15:47,52.5,75.970819908543,-69.1944511546827,1,-18.953164235502,0.124167030713809,"Kerguelen",1.99,"M"
"ct109-939-14.ct109-939-14.4964","ct109-939-14",2015-03-07 11:15:47,52.75,75.7503711149918,-69.1687758527239,1,-18.8292028021582,0.123961433343803,"Kerguelen",1.98575,"M"
"ct109-939-14.ct109-939-14.4965","ct109-939-14",2015-03-07 17:15:47,53,75.6166756754836,-69.1881134058737,1,-18.7055072105232,0.123695591635001,"Kerguelen",1.98775,"M"
"ct109-939-14.ct109-939-14.4966","ct109-939-14",2015-03-07 23:15:47,53.25,75.7206836412223,-69.1993851106348,1,-18.5821393535962,0.123367856926987,"Kerguelen",1.96875,"M"
"ct109-939-14.ct109-939-14.4967","ct109-939-14",2015-03-08 05:15:47,53.5,75.7677140448644,-69.1822409881424,1,-18.4591666348701,0.122972718726072,"Kerguelen",1.93825,"M"
"ct109-939-14.ct109-939-14.4968","ct109-939-14",2015-03-08 11:15:47,53.75,75.5181171943312,-69.226364610837,1,-18.336658286321,0.122508348549133,"Kerguelen",1.87625,"M"
"ct109-939-14.ct109-939-14.4969","ct109-939-14",2015-03-08 17:15:47,54,75.3969283724107,-69.2214106654732,1,-18.2146728678067,0.121985418514342,"Kerguelen",1.797,"M"
"ct109-939-14.ct109-939-14.4970","ct109-939-14",2015-03-08 23:15:47,54.25,75.3023708717359,-69.2013617131765,1,-18.0932610908,0.121411777006608,"Kerguelen",1.74525,"M"
"ct109-939-14.ct109-939-14.4971","ct109-939-14",2015-03-09 05:15:47,54.5,75.1177532600472,-69.1935554291443,1,-17.9724744920874,0.120786598712644,"Kerguelen",1.73375,"M"
"ct109-939-14.ct109-939-14.4972","ct109-939-14",2015-03-09 11:15:47,54.75,74.8756422483701,-69.1255736124469,1,-17.852365670715,0.120108821372411,"Kerguelen",1.8245,"M"
"ct109-939-14.ct109-939-14.4973","ct109-939-14",2015-03-09 17:15:47,55,74.8020811242974,-69.1379350191447,1,-17.7329883174784,0.119377353236622,"Kerguelen",1.83725,"M"
"ct109-939-14.ct109-939-14.4974","ct109-939-14",2015-03-09 23:15:47,55.25,74.904125573903,-69.1714664120222,1,-17.6143960132886,0.118592304189741,"Kerguelen",1.8385,"M"
"ct109-939-14.ct109-939-14.4975","ct109-939-14",2015-03-10 05:15:47,55.5,74.8213572351439,-69.1831138190807,1,-17.4966393597066,0.11775665358206,"Kerguelen",1.826,"M"
"ct109-939-14.ct109-939-14.4976","ct109-939-14",2015-03-10 11:15:47,55.75,74.7001635812332,-69.1519732818849,1,-17.3797691781825,0.116870181524042,"Kerguelen",1.82125,"M"
"ct109-939-14.ct109-939-14.4977","ct109-939-14",2015-03-10 17:15:47,56,74.5701894911378,-69.102181503551,1,-17.2638373714625,0.11593180672001,"Kerguelen",1.8275,"M"
"ct109-939-14.ct109-939-14.4978","ct109-939-14",2015-03-10 23:15:47,56.25,74.5650884708583,-69.0799789678281,1,-17.1488969445375,0.114940426924973,"Kerguelen",1.821,"M"
"ct109-939-14.ct109-939-14.4979","ct109-939-14",2015-03-11 05:15:47,56.5,74.5866143989415,-69.0774247269498,1,-17.0350020234014,0.113894921136126,"Kerguelen",1.816,"M"
"ct109-939-14.ct109-939-14.4980","ct109-939-14",2015-03-11 11:15:47,56.75,74.6759895280992,-69.0381354202417,1,-16.9221997603384,0.112802263063003,"Kerguelen",1.813,"M"
"ct109-939-14.ct109-939-14.4981","ct109-939-14",2015-03-11 17:15:47,57,74.8500474894955,-68.9926969093317,1,-16.8105097125029,0.111690047835492,"Kerguelen",1.8455,"M"
"ct109-939-14.ct109-939-14.4982","ct109-939-14",2015-03-11 23:15:47,57.25,74.9100746419525,-68.9929685203863,1,-16.6999456058367,0.110564106666225,"Kerguelen",1.859,"M"
"ct109-939-14.ct109-939-14.4983","ct109-939-14",2015-03-12 05:15:47,57.5,75.0494394389416,-68.985614267252,1,-16.5905215127248,0.109424093111926,"Kerguelen",1.88875,"M"
"ct109-939-14.ct109-939-14.4984","ct109-939-14",2015-03-12 11:15:47,57.75,75.0683446663352,-68.96228030874,1,-16.4822518509062,0.108269661818544,"Kerguelen",1.90675,"M"
"ct109-939-14.ct109-939-14.4985","ct109-939-14",2015-03-12 17:15:47,58,75.1682931000006,-68.9393903584258,1,-16.3751513819457,0.107100468960525,"Kerguelen",1.9325,"M"
"ct109-939-14.ct109-939-14.4986","ct109-939-14",2015-03-12 23:15:47,58.25,75.2070727273116,-68.9187926883302,1,-16.2692352092361,0.10591617270963,"Kerguelen",1.961,"M"
"ct109-939-14.ct109-939-14.4987","ct109-939-14",2015-03-13 05:15:47,58.5,75.3260217551035,-68.9484039005746,1,-16.1645187754926,0.104716433743474,"Kerguelen",1.995,"M"
"ct109-939-14.ct109-939-14.4988","ct109-939-14",2015-03-13 11:15:47,58.75,75.1539605698275,-68.9503497960344,1,-16.0610178597214,0.103500915771176,"Kerguelen",1.99725,"M"
"ct109-939-14.ct109-939-14.4989","ct109-939-14",2015-03-13 17:15:47,59,75.0809298190092,-68.9007947902666,1,-15.9587485736103,0.102269286111106,"Kerguelen",1.99925,"M"
"ct109-939-14.ct109-939-14.4990","ct109-939-14",2015-03-13 23:15:47,59.25,75.0994805572399,-68.9154944380082,1,-15.8577273573201,0.101021216290245,"Kerguelen",1.999,"M"
"ct109-939-14.ct109-939-14.4991","ct109-939-14",2015-03-14 05:15:47,59.5,74.9965951772341,-68.9222037886959,1,-15.7579709746373,0.0997563826827474,"Kerguelen",1.99925,"M"
"ct109-939-14.ct109-939-14.4992","ct109-939-14",2015-03-14 11:15:47,59.75,75.1154017037881,-68.8708685424921,1,-15.659496507456,0.0984744671812948,"Kerguelen",1.998,"M"
"ct109-939-14.ct109-939-14.4993","ct109-939-14",2015-03-14 17:15:47,60,75.0424569331035,-68.8904509837264,1,-15.5623213495464,0.0971751579096236,"Kerguelen",1.989,"M"
"ct109-942-14.ct109-942-14.5112","ct109-942-14",2015-01-06 05:50:35,0.25,79.5102254783347,-56.9514124949722,0,-35.1605781073287,-0.0109242704687262,"Kerguelen",1,"M"
"ct109-942-14.ct109-942-14.5113","ct109-942-14",2015-01-06 11:50:35,0.5,79.7765675208749,-57.0916224462383,0,-35.1714886607457,-0.0109105534169873,"Kerguelen",1,"M"
"ct109-942-14.ct109-942-14.5114","ct109-942-14",2015-01-06 17:50:35,0.75,80.0680202798062,-57.2649984204068,0,-35.1823763189605,-0.0108876582148587,"Kerguelen",1,"M"
"ct109-942-14.ct109-942-14.5115","ct109-942-14",2015-01-06 23:50:35,1,80.3936029116322,-57.4784070153987,0,-35.1932319003501,-0.0108555813895739,"Kerguelen",1,"M"
"ct109-942-14.ct109-942-14.5116","ct109-942-14",2015-01-07 05:50:35,1.25,80.623300861688,-57.6907595414524,0,-35.20404621982,-0.0108143194698374,"Kerguelen",1,"M"
"ct109-942-14.ct109-942-14.5117","ct109-942-14",2015-01-07 11:50:35,1.5,80.7528017539575,-57.8673818751889,0,-35.2148100888102,-0.0107638689902323,"Kerguelen",1,"M"
"ct109-942-14.ct109-942-14.5118","ct109-942-14",2015-01-07 17:50:35,1.75,80.928112732599,-58.0803936765085,0,-35.2255143153123,-0.0107042265021173,"Kerguelen",1,"M"
"ct109-942-14.ct109-942-14.5119","ct109-942-14",2015-01-07 23:50:35,2,81.0826866883499,-58.2702462540799,0,-35.2361497038938,-0.0106353885814647,"Kerguelen",1,"M"
"ct109-942-14.ct109-942-14.5120","ct109-942-14",2015-01-08 05:50:35,2.25,81.4395574369598,-58.4830540046765,0,-35.2467070557279,-0.0105573518341284,"Kerguelen",1,"M"
"ct109-942-14.ct109-942-14.5121","ct109-942-14",2015-01-08 11:50:35,2.5,81.7471929019474,-58.6898704221994,0,-35.2571771686348,-0.0104701129069351,"Kerguelen",1,"M"
"ct109-942-14.ct109-942-14.5122","ct109-942-14",2015-01-08 17:50:35,2.75,81.9404671544675,-58.8403125652334,0,-35.2675508371305,-0.0103736684956501,"Kerguelen",1,"M"
"ct109-942-14.ct109-942-14.5123","ct109-942-14",2015-01-08 23:50:35,3,82.1777616254417,-59.016690321942,0,-35.2778188521114,-0.0102680149809353,"Kerguelen",1,"M"
"ct109-942-14.ct109-942-14.5124","ct109-942-14",2015-01-09 05:50:35,3.25,82.3910313581912,-59.1761795205231,0,-35.2879681285817,-0.0101492764702837,"Kerguelen",1,"M"
"ct109-942-14.ct109-942-14.5125","ct109-942-14",2015-01-09 11:50:35,3.5,82.5924606841188,-59.3397016275775,0,-35.2979721544488,-0.0100040258670664,"Kerguelen",1,"M"
"ct109-942-14.ct109-942-14.5126","ct109-942-14",2015-01-09 17:50:35,3.75,82.8312086245864,-59.5012204214139,0,-35.3078015025126,-0.00982934806382785,"Kerguelen",1,"M"
"ct109-942-14.ct109-942-14.5127","ct109-942-14",2015-01-09 23:50:35,4,83.0291358893191,-59.6582424328547,0,-35.3174267358379,-0.00962523332526111,"Kerguelen",1,"M"
"ct109-942-14.ct109-942-14.5128","ct109-942-14",2015-01-10 05:50:35,4.25,83.3066532275188,-59.8437419788954,0,-35.3268184082036,-0.00939167236579386,"Kerguelen",1,"M"
"ct109-942-14.ct109-942-14.5129","ct109-942-14",2015-01-10 11:50:35,4.5,83.5758831658717,-59.9688786587141,0,-35.3359470646373,-0.00912865643364902,"Kerguelen",1,"M"
"ct109-942-14.ct109-942-14.5130","ct109-942-14",2015-01-10 17:50:35,4.75,83.7633708672425,-60.1614121510459,0,-35.34478324203,-0.00883617739269593,"Kerguelen",1.00025,"M"
"ct109-942-14.ct109-942-14.5131","ct109-942-14",2015-01-10 23:50:35,5,83.8500296713076,-60.3455471097182,0,-35.3532974698409,-0.00851422781088518,"Kerguelen",1,"M"
"ct109-942-14.ct109-942-14.5132","ct109-942-14",2015-01-11 05:50:35,5.25,83.9193654162575,-60.4697454883696,0,-35.3614602708873,-0.00816280104637968,"Kerguelen",1,"M"
"ct109-942-14.ct109-942-14.5133","ct109-942-14",2015-01-11 11:50:35,5.5,84.0763152007999,-60.5813154154067,0,-35.3692421622188,-0.00778189133150975,"Kerguelen",1.00025,"M"
"ct109-942-14.ct109-942-14.5134","ct109-942-14",2015-01-11 17:50:35,5.75,84.2832645874262,-60.6300718084043,0,-35.3766136560811,-0.00737149386236258,"Kerguelen",1,"M"
"ct109-942-14.ct109-942-14.5135","ct109-942-14",2015-01-11 23:50:35,6,84.3956516265775,-60.6835651501349,0,-35.3835452609678,-0.00693160488671185,"Kerguelen",1,"M"
"ct109-942-14.ct109-942-14.5136","ct109-942-14",2015-01-12 05:50:35,6.25,84.5920910937446,-60.8182250753333,0,-35.3900074827554,-0.00646222178758427,"Kerguelen",1,"M"
"ct109-942-14.ct109-942-14.5137","ct109-942-14",2015-01-12 11:50:35,6.5,84.7882360492726,-60.9815663564133,0,-35.3959708259291,-0.00596334317363167,"Kerguelen",1,"M"
"ct109-942-14.ct109-942-14.5138","ct109-942-14",2015-01-12 17:50:35,6.75,84.9413717094618,-61.0678633618212,0,-35.4014057948943,-0.00543496896524553,"Kerguelen",1,"M"
"ct109-942-14.ct109-942-14.5139","ct109-942-14",2015-01-12 23:50:35,7,85.1768131106818,-61.1435245390791,0,-35.4062828953722,-0.00487710047785694,"Kerguelen",1,"M"
"ct109-942-14.ct109-942-14.5140","ct109-942-14",2015-01-13 05:50:35,7.25,85.5703347363845,-61.2377489366437,0,-35.4105726358817,-0.00428974050954434,"Kerguelen",1,"M"
"ct109-942-14.ct109-942-14.5141","ct109-942-14",2015-01-13 11:50:35,7.5,85.9818440379807,-61.3271267728802,0,-35.4142455293061,-0.00367289342442234,"Kerguelen",1.0005,"M"
"ct109-942-14.ct109-942-14.5142","ct109-942-14",2015-01-13 17:50:35,7.75,86.1694879251901,-61.3895385665725,0,-35.4172720945384,-0.00302656523232248,"Kerguelen",1.00025,"M"
"ct109-942-14.ct109-942-14.5143","ct109-942-14",2015-01-13 23:50:35,8,86.3516423808801,-61.4295840129735,0,-35.4196228582104,-0.00235076367192666,"Kerguelen",1,"M"
"ct109-942-14.ct109-942-14.5144","ct109-942-14",2015-01-14 05:50:35,8.25,86.7262614083339,-61.5035866148956,0,-35.421268356499,-0.00164549828858274,"Kerguelen",1,"M"
"ct109-942-14.ct109-942-14.5145","ct109-942-14",2015-01-14 11:50:35,8.5,87.1716985871001,-61.5995578912125,0,-35.4221791370066,-0.000910780507684672,"Kerguelen",1,"M"
"ct109-942-14.ct109-942-14.5146","ct109-942-14",2015-01-14 17:50:35,8.75,87.4460362272683,-61.6445148551555,0,-35.4223257607173,-0.000146623710628457,"Kerguelen",1,"M"
"ct109-942-14.ct109-942-14.5147","ct109-942-14",2015-01-14 23:50:35,9,87.7468204273854,-61.7124586443846,0,-35.4216788040212,0.000646956696059853,"Kerguelen",1,"M"
"ct109-942-14.ct109-942-14.5148","ct109-942-14",2015-01-15 05:50:35,9.25,88.059664468689,-61.8179973368405,0,-35.4202088608049,0.00146994321628124,"Kerguelen",1,"M"
"ct109-942-14.ct109-942-14.5149","ct109-942-14",2015-01-15 11:50:35,9.5,88.3491056759925,-61.9629773736341,0,-35.4178865446055,0.00232231619943235,"Kerguelen",1,"M"
"ct109-942-14.ct109-942-14.5150","ct109-942-14",2015-01-15 17:50:35,9.75,88.61575950356,-62.1499869201664,0,-35.4146824908219,0.00320405378360644,"Kerguelen",1,"M"
"ct109-942-14.ct109-942-14.5151","ct109-942-14",2015-01-15 23:50:35,10,88.8532396267047,-62.3037303158761,0,-35.4105673589809,0.00411513184099821,"Kerguelen",1,"M"
"ct109-942-14.ct109-942-14.5152","ct109-942-14",2015-01-16 05:50:35,10.25,89.1254150341433,-62.3984819269721,0,-35.4055118350492,0.00505552393167408,"Kerguelen",1,"M"
"ct109-942-14.ct109-942-14.5153","ct109-942-14",2015-01-16 11:50:35,10.5,89.433633186654,-62.4988214378567,0,-35.3994866337904,0.00602520125886352,"Kerguelen",1,"M"
"ct109-942-14.ct109-942-14.5154","ct109-942-14",2015-01-16 17:50:35,10.75,89.7348033395557,-62.581330234799,0,-35.3924625011585,0.00702413263182766,"Kerguelen",1.00025,"M"
"ct109-942-14.ct109-942-14.5155","ct109-942-14",2015-01-16 23:50:35,11,90.0249604349618,-62.644587387783,0,-35.3844102167204,0.00805228443812589,"Kerguelen",1.0675,"M"
"ct109-942-14.ct109-942-14.5156","ct109-942-14",2015-01-17 05:50:35,11.25,90.1600494234912,-62.6458927854554,0,-35.3753005961023,0.0091096206181307,"Kerguelen",1.05175,"M"
"ct109-942-14.ct109-942-14.5157","ct109-942-14",2015-01-17 11:50:35,11.5,90.427982755556,-62.707636076481,0,-35.3651063089877,0.0101942871146121,"Kerguelen",1,"M"
"ct109-942-14.ct109-942-14.5158","ct109-942-14",2015-01-17 17:50:35,11.75,90.7698354733605,-62.816432916371,0,-35.3538178810184,0.0112884279692249,"Kerguelen",1,"M"
"ct109-942-14.ct109-942-14.5159","ct109-942-14",2015-01-17 23:50:35,12,91.1001699239068,-62.9861888583158,0,-35.3414370124017,0.0123808686167071,"Kerguelen",1,"M"
"ct109-942-14.ct109-942-14.5160","ct109-942-14",2015-01-18 05:50:35,12.25,91.472574151384,-63.1542730953564,0,-35.3279718390254,0.0134651733762814,"Kerguelen",1,"M"
"ct109-942-14.ct109-942-14.5161","ct109-942-14",2015-01-18 11:50:35,12.5,91.853137393165,-63.2519596510954,0,-35.3134328812499,0.014538957775545,"Kerguelen",1,"M"
"ct109-942-14.ct109-942-14.5162","ct109-942-14",2015-01-18 17:50:35,12.75,92.1911260881222,-63.4053377990499,0,-35.2978306869116,0.0156021943383378,"Kerguelen",1,"M"
"ct109-942-14.ct109-942-14.5163","ct109-942-14",2015-01-18 23:50:35,13,92.4502101859344,-63.5001963275387,0,-35.2811758257042,0.0166548612073658,"Kerguelen",1,"M"
"ct109-942-14.ct109-942-14.5164","ct109-942-14",2015-01-19 05:50:35,13.25,92.7975349120882,-63.5965212434871,0,-35.2634788877282,0.0176969379759917,"Kerguelen",1,"M"
"ct109-942-14.ct109-942-14.5165","ct109-942-14",2015-01-19 11:50:35,13.5,93.1090031964421,-63.6876765105401,0,-35.2447504820374,0.0187284056908044,"Kerguelen",1.003,"M"
"ct109-942-14.ct109-942-14.5166","ct109-942-14",2015-01-19 17:50:35,13.75,93.2970084100145,-63.734810062938,0,-35.2250012351832,0.019749246854156,"Kerguelen",1.0065,"M"
"ct109-942-14.ct109-942-14.5167","ct109-942-14",2015-01-19 23:50:35,14,93.3425137566651,-63.7394486994851,0,-35.204241789755,0.0207594454282201,"Kerguelen",1.0035,"M"
"ct109-942-14.ct109-942-14.5168","ct109-942-14",2015-01-20 05:50:35,14.25,93.6203823173426,-63.874258415495,0,-35.1824828029248,0.0217589868302726,"Kerguelen",1,"M"
"ct109-942-14.ct109-942-14.5169","ct109-942-14",2015-01-20 11:50:35,14.5,93.9756316000118,-63.9516648579646,0,-35.1597349449954,0.0227478579293727,"Kerguelen",1,"M"
"ct109-942-14.ct109-942-14.5170","ct109-942-14",2015-01-20 17:50:35,14.75,94.289687965925,-64.0487101007379,0,-35.1360088979517,0.0237260470436595,"Kerguelen",1.008,"M"
"ct109-942-14.ct109-942-14.5171","ct109-942-14",2015-01-20 23:50:35,15,94.4142957958087,-64.0870303179324,0,-35.1113153540217,0.0246935439300433,"Kerguelen",1.0005,"M"
"ct109-942-14.ct109-942-14.5172","ct109-942-14",2015-01-21 05:50:35,15.25,94.8215409051659,-64.1543195102929,0,-35.0856650142466,0.0256503397750629,"Kerguelen",1,"M"
"ct109-942-14.ct109-942-14.5173","ct109-942-14",2015-01-21 11:50:35,15.5,95.1621759857921,-64.1905849112825,0,-35.0590685870605,0.0265964271861596,"Kerguelen",1,"M"
"ct109-942-14.ct109-942-14.5174","ct109-942-14",2015-01-21 17:50:35,15.75,95.6582878084757,-64.1315685055068,0,-35.0315367868839,0.0275318001765334,"Kerguelen",1,"M"
"ct109-942-14.ct109-942-14.5175","ct109-942-14",2015-01-21 23:50:35,16,95.9911034922239,-63.9698981206101,0,-35.0030803327338,0.0284564541500942,"Kerguelen",1.106,"M"
"ct109-942-14.ct109-942-14.5176","ct109-942-14",2015-01-22 05:50:35,16.25,96.1959406465417,-63.9735384530995,0,-34.9737099468453,0.0293703858885497,"Kerguelen",1.047,"M"
"ct109-942-14.ct109-942-14.5177","ct109-942-14",2015-01-22 11:50:35,16.5,96.5137239432827,-63.9505305585359,0,-34.9434363533148,0.0302735935304832,"Kerguelen",1,"M"
"ct109-942-14.ct109-942-14.5178","ct109-942-14",2015-01-22 17:50:35,16.75,96.9484594671008,-63.9603080160134,0,-34.9122702767609,0.031166076553929,"Kerguelen",1,"M"
"ct109-942-14.ct109-942-14.5179","ct109-942-14",2015-01-22 23:50:35,17,97.3071178033497,-64.0779154205178,0,-34.8802224410064,0.0320478357544951,"Kerguelen",1,"M"
"ct109-942-14.ct109-942-14.5180","ct109-942-14",2015-01-23 05:50:35,17.25,97.6692358905409,-64.2057113313063,0,-34.8473035677805,0.0329188732259067,"Kerguelen",1,"M"
"ct109-942-14.ct109-942-14.5181","ct109-942-14",2015-01-23 11:50:35,17.5,98.1279478120825,-64.231600018021,0,-34.8135243754457,0.0337791923347541,"Kerguelen",1,"M"
"ct109-942-14.ct109-942-14.5182","ct109-942-14",2015-01-23 17:50:35,17.75,98.5429443396989,-64.2874679976692,0,-34.77889557775,0.0346287976957516,"Kerguelen",1.6205,"M"
"ct109-942-14.ct109-942-14.5183","ct109-942-14",2015-01-23 23:50:35,18,98.5501042625414,-64.3542889241964,0,-34.7434278826009,0.0354676951491051,"Kerguelen",1.5875,"M"
"ct109-942-14.ct109-942-14.5184","ct109-942-14",2015-01-24 05:50:35,18.25,98.5581979076409,-64.5603684272036,0,-34.7071319908694,0.0362958917314804,"Kerguelen",1.9325,"M"
"ct109-942-14.ct109-942-14.5185","ct109-942-14",2015-01-24 11:50:35,18.5,98.2669445592189,-64.5527414792389,0,-34.6700185952213,0.0371133956480862,"Kerguelen",1.911,"M"
"ct109-942-14.ct109-942-14.5186","ct109-942-14",2015-01-24 17:50:35,18.75,98.0432686339963,-64.5190224620274,0,-34.6320983789743,0.0379202162470282,"Kerguelen",1.925,"M"
"ct109-942-14.ct109-942-14.5187","ct109-942-14",2015-01-24 23:50:35,19,98.0973104285975,-64.5940359570741,0,-34.593382014987,0.0387163639872123,"Kerguelen",1.86175,"M"
"ct109-942-14.ct109-942-14.5188","ct109-942-14",2015-01-25 05:50:35,19.25,98.1362985587219,-64.6581166550241,0,-34.553880164579,0.0395018504080191,"Kerguelen",1.76675,"M"
"ct109-942-14.ct109-942-14.5189","ct109-942-14",2015-01-25 11:50:35,19.5,98.056867619083,-64.598068339689,0,-34.5136034764779,0.0402766881011263,"Kerguelen",1.057,"M"
"ct109-942-14.ct109-942-14.5190","ct109-942-14",2015-01-25 17:50:35,19.75,98.039111671767,-64.4297508248228,0,-34.4725625864891,0.0410408899888304,"Kerguelen",1.01625,"M"
"ct109-942-14.ct109-942-14.5191","ct109-942-14",2015-01-25 23:50:35,20,97.8505137646813,-64.2546595988951,0,-34.430768145724,0.0417944407650639,"Kerguelen",1.29775,"M"
"ct109-942-14.ct109-942-14.5192","ct109-942-14",2015-01-26 05:50:35,20.25,97.754149457806,-64.2090577321716,0,-34.3882308305063,0.0425373152176722,"Kerguelen",1.33225,"M"
"ct109-942-14.ct109-942-14.5193","ct109-942-14",2015-01-26 11:50:35,20.5,97.6140188832407,-64.2542651946428,0,-34.3449613035371,0.0432695269691863,"Kerguelen",1.33375,"M"
"ct109-942-14.ct109-942-14.5194","ct109-942-14",2015-01-26 17:50:35,20.75,97.523706679354,-64.332270645389,0,-34.3009702100735,0.0439910934636301,"Kerguelen",1.38725,"M"
"ct109-942-14.ct109-942-14.5195","ct109-942-14",2015-01-26 23:50:35,21,97.4573425831177,-64.2674178291116,0,-34.2562689393366,0.0447012707369188,"Kerguelen",1.34125,"M"
"ct109-942-14.ct109-942-14.5196","ct109-942-14",2015-01-27 05:50:35,21.25,97.4132294414438,-64.293712132971,0,-34.2108754572153,0.0453934821212865,"Kerguelen",1.10525,"M"
"ct109-942-14.ct109-942-14.5197","ct109-942-14",2015-01-27 11:50:35,21.5,97.3038698452344,-64.3771415520166,0,-34.164811081088,0.0460643761272916,"Kerguelen",1.0255,"M"
"ct109-942-14.ct109-942-14.5198","ct109-942-14",2015-01-27 17:50:35,21.75,97.2840749289252,-64.4751965956622,0,-34.1180971219009,0.0467139591871335,"Kerguelen",1.00875,"M"
"ct109-942-14.ct109-942-14.5199","ct109-942-14",2015-01-27 23:50:35,22,97.197259219033,-64.5461623327593,0,-34.0707548559946,0.0473422659062528,"Kerguelen",1.002,"M"
"ct109-942-14.ct109-942-14.5200","ct109-942-14",2015-01-28 05:50:35,22.25,96.9415967304128,-64.5625768739998,1,-34.0228055245469,0.0479493314477053,"Kerguelen",1,"M"
"ct109-942-14.ct109-942-14.5201","ct109-942-14",2015-01-28 11:50:35,22.5,96.6920381476122,-64.6199342283886,1,-33.9742703331088,0.048535191438176,"Kerguelen",1,"M"
"ct109-942-14.ct109-942-14.5202","ct109-942-14",2015-01-28 17:50:35,22.75,96.3822325872838,-64.6981662905167,1,-33.9251704512404,0.0490998818683974,"Kerguelen",1,"M"
"ct109-942-14.ct109-942-14.5203","ct109-942-14",2015-01-28 23:50:35,23,95.9943402700909,-64.8051271253623,1,-33.8755270122407,0.0496434389996803,"Kerguelen",1,"M"
"ct109-942-14.ct109-942-14.5204","ct109-942-14",2015-01-29 05:50:35,23.25,95.6437968955335,-64.9543000291493,1,-33.8253611129681,0.0501658992725917,"Kerguelen",1,"M"
"ct109-942-14.ct109-942-14.5205","ct109-942-14",2015-01-29 11:50:35,23.5,95.2059109002682,-65.0308358288829,1,-33.7746938137542,0.0506672992139301,"Kerguelen",1.00025,"M"
"ct109-942-14.ct109-942-14.5206","ct109-942-14",2015-01-29 17:50:35,23.75,94.9037648983029,-65.0608623497423,1,-33.7235461384055,0.0511476753486395,"Kerguelen",1.00375,"M"
"ct109-942-14.ct109-942-14.5207","ct109-942-14",2015-01-29 23:50:35,24,94.7200655386684,-65.0574615113993,1,-33.6719390742941,0.0516070641113975,"Kerguelen",1.00275,"M"
"ct109-942-14.ct109-942-14.5208","ct109-942-14",2015-01-30 05:50:35,24.25,94.6113494345407,-64.9865239187025,1,-33.6198935725299,0.0520455017641863,"Kerguelen",1.00025,"M"
"ct109-942-14.ct109-942-14.5209","ct109-942-14",2015-01-30 11:50:35,24.5,94.5600218153431,-64.8693113171081,1,-33.5674305482188,0.0524630243111779,"Kerguelen",1,"M"
"ct109-942-14.ct109-942-14.5210","ct109-942-14",2015-01-30 17:50:35,24.75,94.776982675877,-64.7010709497543,1,-33.5145708808005,0.0528596674182202,"Kerguelen",1,"M"
"ct109-942-14.ct109-942-14.5211","ct109-942-14",2015-01-30 23:50:35,25,95.0130281134599,-64.4895206939404,0,-33.4613354144629,0.0532354663376144,"Kerguelen",1,"M"
"ct109-942-14.ct109-942-14.5212","ct109-942-14",2015-01-31 05:50:35,25.25,95.1223391697611,-64.2878119106818,0,-33.4077449586333,0.053590455829633,"Kerguelen",1,"M"
"ct109-942-14.ct109-942-14.5213","ct109-942-14",2015-01-31 11:50:35,25.5,95.1707654479487,-64.101056433354,0,-33.353820288543,0.0539246700902385,"Kerguelen",1,"M"
"ct109-942-14.ct109-942-14.5214","ct109-942-14",2015-01-31 17:50:35,25.75,95.2208591607499,-63.980412299116,0,-33.29958214586,0.0542381426830552,"Kerguelen",1,"M"
"ct109-942-14.ct109-942-14.5215","ct109-942-14",2015-01-31 23:50:35,26,95.4144497449273,-63.881792636038,0,-33.2450512393905,0.0545309064694577,"Kerguelen",1,"M"
"ct109-942-14.ct109-942-14.5216","ct109-942-14",2015-02-01 05:50:35,26.25,95.6357924947563,-63.7952238481116,0,-33.1902482458465,0.0548029935440064,"Kerguelen",1,"M"
"ct109-942-14.ct109-942-14.5217","ct109-942-14",2015-02-01 11:50:35,26.5,95.934265175799,-63.6855818126846,0,-33.1351938106713,0.0550544351751947,"Kerguelen",1,"M"
"ct109-942-14.ct109-942-14.5218","ct109-942-14",2015-02-01 17:50:35,26.75,96.336756961803,-63.5997187031938,0,-33.0799085489274,0.055285261743887,"Kerguelen",1,"M"
"ct109-942-14.ct109-942-14.5219","ct109-942-14",2015-02-01 23:50:35,27,96.9001582966881,-63.5787777553745,0,-33.0244130462396,0.0554955026878301,"Kerguelen",1,"M"
"ct109-942-14.ct109-942-14.5220","ct109-942-14",2015-02-02 05:50:35,27.25,97.4042992789895,-63.5412798767128,0,-32.9687278597885,0.0556851864510877,"Kerguelen",1,"M"
"ct109-942-14.ct109-942-14.5221","ct109-942-14",2015-02-02 11:50:35,27.5,97.7260702435085,-63.4633947785553,0,-32.9128735193568,0.055854340431688,"Kerguelen",1,"M"
"ct109-942-14.ct109-942-14.5222","ct109-942-14",2015-02-02 17:50:35,27.75,98.1274614885564,-63.4225353753126,0,-32.8568705284216,0.0560029909352222,"Kerguelen",1,"M"
"ct109-942-14.ct109-942-14.5223","ct109-942-14",2015-02-02 23:50:35,28,98.576319710908,-63.3669603512911,0,-32.8007393652876,0.0561311631339934,"Kerguelen",1,"M"
"ct109-942-14.ct109-942-14.5224","ct109-942-14",2015-02-03 05:50:35,28.25,99.0012605091129,-63.3245012899779,0,-32.7445004858501,0.056238879437509,"Kerguelen",1,"M"
"ct109-942-14.ct109-942-14.5225","ct109-942-14",2015-02-03 11:50:35,28.5,99.3992583866843,-63.315893612718,0,-32.6881755505234,0.0563249353267181,"Kerguelen",1.00025,"M"
"ct109-942-14.ct109-942-14.5226","ct109-942-14",2015-02-03 17:50:35,28.75,99.7325992343989,-63.3603668135895,0,-32.6317896169329,0.0563859335904526,"Kerguelen",1,"M"
"ct109-942-14.ct109-942-14.5227","ct109-942-14",2015-02-03 23:50:35,29,100.069266860478,-63.4322951072115,0,-32.5753683097747,0.0564213071582498,"Kerguelen",1,"M"
"ct109-942-14.ct109-942-14.5228","ct109-942-14",2015-02-04 05:50:35,29.25,100.474322552587,-63.4728720723263,0,-32.5189372310345,0.056431078740149,"Kerguelen",1.00025,"M"
"ct109-942-14.ct109-942-14.5229","ct109-942-14",2015-02-04 11:50:35,29.5,100.897083941031,-63.431372242694,0,-32.4625219616701,0.0564152693644848,"Kerguelen",1,"M"
"ct109-942-14.ct109-942-14.5230","ct109-942-14",2015-02-04 17:50:35,29.75,101.364044964911,-63.4097133188513,0,-32.4061480633223,0.0563738983477224,"Kerguelen",1.00625,"M"
"ct109-942-14.ct109-942-14.5231","ct109-942-14",2015-02-04 23:50:35,30,101.537792019985,-63.4747572103055,0,-32.3498410800505,0.0563069832717922,"Kerguelen",1.00175,"M"
"ct109-942-14.ct109-942-14.5232","ct109-942-14",2015-02-05 05:50:35,30.25,101.714449644872,-63.5266497887991,0,-32.2936265400809,0.0562145399696401,"Kerguelen",1.00075,"M"
"ct109-942-14.ct109-942-14.5233","ct109-942-14",2015-02-05 11:50:35,30.5,101.799607739266,-63.612378147143,0,-32.2375299575705,0.0560965825104176,"Kerguelen",1,"M"
"ct109-942-14.ct109-942-14.5234","ct109-942-14",2015-02-05 17:50:35,30.75,101.98048671331,-63.7054120717381,0,-32.1815768343754,0.0559531231950461,"Kerguelen",1,"M"
"ct109-942-14.ct109-942-14.5235","ct109-942-14",2015-02-05 23:50:35,31,102.135952901532,-63.8752796591325,0,-32.1257926618227,0.0557841725527419,"Kerguelen",1,"M"
"ct109-942-14.ct109-942-14.5236","ct109-942-14",2015-02-06 05:50:35,31.25,102.187258460407,-63.9896076232476,0,-32.0702029224747,0.0555897393480387,"Kerguelen",1.0005,"M"
"ct109-942-14.ct109-942-14.5237","ct109-942-14",2015-02-06 11:50:35,31.5,102.212800410668,-64.0797391381592,0,-32.0148330918872,0.0553698305874761,"Kerguelen",1,"M"
"ct109-942-14.ct109-942-14.5238","ct109-942-14",2015-02-06 17:50:35,31.75,102.422553165886,-64.1992503286874,0,-31.9597086403533,0.0551244515338667,"Kerguelen",1,"M"
"ct109-942-14.ct109-942-14.5239","ct109-942-14",2015-02-06 23:50:35,32,102.796123335902,-64.2859768318004,0,-31.9048550346254,0.0548536057279003,"Kerguelen",1,"M"
"ct109-942-14.ct109-942-14.5240","ct109-942-14",2015-02-07 05:50:35,32.25,103.221281770897,-64.3439196512636,0,-31.8502977396144,0.0545572950110207,"Kerguelen",1,"M"
"ct109-942-14.ct109-942-14.5241","ct109-942-14",2015-02-07 11:50:35,32.5,103.611777494756,-64.3726514155578,0,-31.7960622200604,0.0542355195539912,"Kerguelen",1.00575,"M"
"ct109-942-14.ct109-942-14.5242","ct109-942-14",2015-02-07 17:50:35,32.75,103.780862731261,-64.4169884222698,0,-31.7421739414796,0.0538882785808326,"Kerguelen",1.002,"M"
"ct109-942-14.ct109-942-14.5243","ct109-942-14",2015-02-07 23:50:35,33,104.032636047627,-64.4632045251885,0,-31.6886555374375,0.0535184040421188,"Kerguelen",1.0025,"M"
"ct109-942-14.ct109-942-14.5244","ct109-942-14",2015-02-08 05:50:35,33.25,104.2766113543,-64.5634445183071,0,-31.6355203486247,0.0531351888127696,"Kerguelen",1.068,"M"
"ct109-942-14.ct109-942-14.5245","ct109-942-14",2015-02-08 11:50:35,33.5,104.400576651593,-64.6002839472914,0,-31.5827798218651,0.0527405267596315,"Kerguelen",1.133,"M"
"ct109-942-14.ct109-942-14.5246","ct109-942-14",2015-02-08 17:50:35,33.75,104.438912159021,-64.6079238000577,0,-31.530445414728,0.052334407137089,"Kerguelen",1.17025,"M"
"ct109-942-14.ct109-942-14.5247","ct109-942-14",2015-02-08 23:50:35,34,104.450190606664,-64.5894437484282,0,-31.4785285960461,0.0519168186819075,"Kerguelen",1.1875,"M"
"ct109-942-14.ct109-942-14.5248","ct109-942-14",2015-02-09 05:50:35,34.25,104.439647868886,-64.5681333431687,0,-31.4270408464035,0.0514877496425425,"Kerguelen",1.1925,"M"
"ct109-942-14.ct109-942-14.5249","ct109-942-14",2015-02-09 11:50:35,34.5,104.384142721763,-64.5775553743349,0,-31.3759936586002,0.0510471878032881,"Kerguelen",1.19075,"M"
"ct109-942-14.ct109-942-14.5250","ct109-942-14",2015-02-09 17:50:35,34.75,104.452713413985,-64.5615872939218,0,-31.3253985616823,0.0505950969179436,"Kerguelen",1.1775,"M"
"ct109-942-14.ct109-942-14.5251","ct109-942-14",2015-02-09 23:50:35,35,104.455348355605,-64.5526902519459,0,-31.2752720266143,0.0501265350679514,"Kerguelen",1.15825,"M"
"ct109-942-14.ct109-942-14.5252","ct109-942-14",2015-02-10 05:50:35,35.25,104.479960713897,-64.5465318039403,0,-31.2256338370282,0.0496381895861098,"Kerguelen",1.13525,"M"
"ct109-942-14.ct109-942-14.5253","ct109-942-14",2015-02-10 11:50:35,35.5,104.434336551978,-64.5261957012274,0,-31.1764929210016,0.0491409160265743,"Kerguelen",1.11275,"M"
"ct109-942-14.ct109-942-14.5254","ct109-942-14",2015-02-10 17:50:35,35.75,104.448941568472,-64.5303279764599,0,-31.1278570118727,0.048635909128919,"Kerguelen",1.052,"M"
"ct109-942-14.ct109-942-14.5255","ct109-942-14",2015-02-10 23:50:35,36,104.677753722974,-64.5672363894812,0,-31.0797338579241,0.0481231539485871,"Kerguelen",1.0035,"M"
"ct109-942-14.ct109-942-14.5256","ct109-942-14",2015-02-11 05:50:35,36.25,104.941689645442,-64.5632669315574,0,-31.0321312224291,0.0476026354950254,"Kerguelen",1.00025,"M"
"ct109-942-14.ct109-942-14.5257","ct109-942-14",2015-02-11 11:50:35,36.5,105.220055618671,-64.543404720913,0,-30.9850568836747,0.0470743387544548,"Kerguelen",1,"M"
"ct109-942-14.ct109-942-14.5258","ct109-942-14",2015-02-11 17:50:35,36.75,105.625594770594,-64.5244911621193,0,-30.938518634967,0.0465382487076504,"Kerguelen",1.00025,"M"
"ct109-942-14.ct109-942-14.5259","ct109-942-14",2015-02-11 23:50:35,37,105.972616045705,-64.5409914473299,0,-30.8925242846165,0.0459943503504701,"Kerguelen",1,"M"
"ct109-942-14.ct109-942-14.5260","ct109-942-14",2015-02-12 05:50:35,37.25,106.435668982823,-64.6272035743496,0,-30.8470816558992,0.0454426287173237,"Kerguelen",1,"M"
"ct109-942-14.ct109-942-14.5261","ct109-942-14",2015-02-12 11:50:35,37.5,106.718693433341,-64.6806851049023,0,-30.8021985870004,0.0448830688988489,"Kerguelen",1,"M"
"ct109-942-14.ct109-942-14.5262","ct109-942-14",2015-02-12 17:50:35,37.75,107.020033066999,-64.7661807068665,0,-30.757882930936,0.0443156560643754,"Kerguelen",1,"M"
"ct109-942-14.ct109-942-14.5263","ct109-942-14",2015-02-12 23:50:35,38,107.352140364318,-64.8785860659974,0,-30.7141425554555,0.0437403754805332,"Kerguelen",1,"M"
"ct109-942-14.ct109-942-14.5264","ct109-942-14",2015-02-13 05:50:35,38.25,107.717546018586,-64.9977482358558,0,-30.6709853429196,0.0431572125358326,"Kerguelen",1,"M"
"ct109-942-14.ct109-942-14.5265","ct109-942-14",2015-02-13 11:50:35,38.5,107.957444893359,-65.1066222527686,0,-30.6284191901619,0.0425661527577226,"Kerguelen",1.00225,"M"
"ct109-942-14.ct109-942-14.5266","ct109-942-14",2015-02-13 17:50:35,38.75,108.043446454906,-65.2094133660981,1,-30.5864514880011,0.0419677021607667,"Kerguelen",1.0145,"M"
"ct109-942-14.ct109-942-14.5267","ct109-942-14",2015-02-13 23:50:35,39,108.217646878311,-65.2645091019287,1,-30.5450747320747,0.0413767559264144,"Kerguelen",1.05275,"M"
"ct109-942-14.ct109-942-14.5268","ct109-942-14",2015-02-14 05:50:35,39.25,108.347378049539,-65.2828248125119,0,-30.5042646755776,0.0408100564971314,"Kerguelen",1.0885,"M"
"ct109-942-14.ct109-942-14.5269","ct109-942-14",2015-02-14 11:50:35,39.5,108.302317839875,-65.2928921024769,0,-30.4639961888717,0.0402684867059022,"Kerguelen",1.086,"M"
"ct109-942-14.ct109-942-14.5270","ct109-942-14",2015-02-14 17:50:35,39.75,108.282173805711,-65.3123832053374,1,-30.4242441597389,0.0397520291328113,"Kerguelen",1.07325,"M"
"ct109-942-14.ct109-942-14.5271","ct109-942-14",2015-02-14 23:50:35,40,108.453035231757,-65.373014570729,1,-30.3849843966797,0.0392597630591462,"Kerguelen",1.05525,"M"
"ct109-942-14.ct109-942-14.5272","ct109-942-14",2015-02-15 05:50:35,40.25,108.622291736515,-65.3301097873113,1,-30.3461943125444,0.038790084135365,"Kerguelen",1.0015,"M"
"ct109-942-14.ct109-942-14.5273","ct109-942-14",2015-02-15 11:50:35,40.5,108.967258682007,-65.2809779463275,0,-30.3078514854336,0.0383428271107711,"Kerguelen",1.002,"M"
"ct109-942-14.ct109-942-14.5274","ct109-942-14",2015-02-15 17:50:35,40.75,109.188991346512,-65.3037246039892,0,-30.2699334966689,0.0379179887646575,"Kerguelen",1.0005,"M"
"ct109-942-14.ct109-942-14.5275","ct109-942-14",2015-02-15 23:50:35,41,109.371285458491,-65.3840524095477,1,-30.2324179299707,0.0375155666982763,"Kerguelen",1,"M"
"ct109-942-14.ct109-942-14.5276","ct109-942-14",2015-02-16 05:50:35,41.25,109.632510680284,-65.4898837931746,1,-30.1952823706743,0.0371355592963141,"Kerguelen",1.01475,"M"
"ct109-942-14.ct109-942-14.5277","ct109-942-14",2015-02-16 11:50:35,41.5,109.724368281542,-65.5232793503067,1,-30.1585044049881,0.0367779656862077,"Kerguelen",1.00575,"M"
"ct109-942-14.ct109-942-14.5278","ct109-942-14",2015-02-16 17:50:35,41.75,109.888383714401,-65.5390417261,1,-30.1220616192834,0.0364427857046989,"Kerguelen",1.00125,"M"
"ct109-942-14.ct109-942-14.5279","ct109-942-14",2015-02-16 23:50:35,42,110.143835860447,-65.4617984606146,1,-30.0859315994137,0.0361300198696957,"Kerguelen",1,"M"
"ct109-942-14.ct109-942-14.5280","ct109-942-14",2015-02-17 05:50:35,42.25,110.419795818645,-65.3405807720386,1,-30.0500919300632,0.0358396693505847,"Kerguelen",1.004,"M"
"ct109-942-14.ct109-942-14.5281","ct109-942-14",2015-02-17 11:50:35,42.5,110.557403352147,-65.2358834016136,0,-30.0145204275742,0.0355715024889403,"Kerguelen",1.032,"M"
"ct109-942-14.ct109-942-14.5282","ct109-942-14",2015-02-17 17:50:35,42.75,110.641446907424,-65.1775386371872,0,-29.9791978948653,0.035322532708959,"Kerguelen",1.075,"M"
"ct109-942-14.ct109-942-14.5283","ct109-942-14",2015-02-17 23:50:35,43,110.723010393123,-65.2129774504202,0,-29.9441072004016,0.0350906944636853,"Kerguelen",1.077,"M"
"ct109-942-14.ct109-942-14.5284","ct109-942-14",2015-02-18 05:50:35,43.25,110.847252350796,-65.2708782906297,0,-29.9092312521068,0.0348759482948213,"Kerguelen",1.08975,"M"
"ct109-942-14.ct109-942-14.5285","ct109-942-14",2015-02-18 11:50:35,43.5,111.075572301239,-65.289876592918,0,-29.8745529556465,0.0346782964602166,"Kerguelen",1.17675,"M"
"ct109-942-14.ct109-942-14.5286","ct109-942-14",2015-02-18 17:50:35,43.75,111.29879068098,-65.3010325931061,0,-29.8400552139972,0.0344977416493197,"Kerguelen",1.57775,"M"
"ct109-942-14.ct109-942-14.5287","ct109-942-14",2015-02-18 23:50:35,44,111.346925314895,-65.3075931029558,0,-29.8057211116298,0.034334102367467,"Kerguelen",1.716,"M"
"ct109-942-14.ct109-942-14.5288","ct109-942-14",2015-02-19 05:50:35,44.25,111.341114975899,-65.3246122461891,1,-29.7715362650696,0.0341848465601757,"Kerguelen",1.7865,"M"
"ct109-942-14.ct109-942-14.5289","ct109-942-14",2015-02-19 11:50:35,44.5,111.3342230212,-65.3397944603999,1,-29.7374881299643,0.0340481351052746,"Kerguelen",1.81575,"M"
"ct109-942-14.ct109-942-14.5290","ct109-942-14",2015-02-19 17:50:35,44.75,111.363729690825,-65.3581410123947,1,-29.7035642008083,0.0339239291559823,"Kerguelen",1.83575,"M"
"ct109-942-14.ct109-942-14.5291","ct109-942-14",2015-02-19 23:50:35,45,111.318125347134,-65.3647003882095,1,-29.6697519692077,0.0338122316005773,"Kerguelen",1.8505,"M"
"ct109-942-14.ct109-942-14.5292","ct109-942-14",2015-02-20 05:50:35,45.25,111.171008606957,-65.346368831944,1,-29.6360389234369,0.0337130457708779,"Kerguelen",1.8735,"M"
"ct109-942-14.ct109-942-14.5293","ct109-942-14",2015-02-20 11:50:35,45.5,111.144795738993,-65.3748364129322,1,-29.602411960276,0.0336269631608377,"Kerguelen",1.88125,"M"
"ct109-942-14.ct109-942-14.5294","ct109-942-14",2015-02-20 17:50:35,45.75,111.24119089547,-65.3667416974789,1,-29.5688560435523,0.0335559167237431,"Kerguelen",1.88,"M"
"ct109-942-14.ct109-942-14.5295","ct109-942-14",2015-02-20 23:50:35,46,111.248512481411,-65.3813353427966,1,-29.5353557370065,0.0335003065457418,"Kerguelen",1.87475,"M"
"ct109-942-14.ct109-942-14.5296","ct109-942-14",2015-02-21 05:50:35,46.25,111.407428376,-65.3796345021132,1,-29.501895671465,0.0334600655415462,"Kerguelen",1.86925,"M"
"ct109-942-14.ct109-942-14.5297","ct109-942-14",2015-02-21 11:50:35,46.5,111.455289233186,-65.3642153535832,1,-29.4684640396032,0.0334316318618078,"Kerguelen",1.8575,"M"
"ct109-942-14.ct109-942-14.5298","ct109-942-14",2015-02-21 17:50:35,46.75,111.410046814571,-65.3691211361839,1,-29.4350545019844,0.0334095376187393,"Kerguelen",1.83125,"M"
"ct109-942-14.ct109-942-14.5299","ct109-942-14",2015-02-21 23:50:35,47,111.323977874076,-65.3751412373163,1,-29.4016689401189,0.033385561865551,"Kerguelen",1.79825,"M"
"ct109-942-14.ct109-942-14.5300","ct109-942-14",2015-02-22 05:50:35,47.25,111.370244011465,-65.2918283235541,0,-29.368316847262,0.0333520928569253,"Kerguelen",1.73625,"M"
"ct109-942-14.ct109-942-14.5301","ct109-942-14",2015-02-22 11:50:35,47.5,111.40485894357,-65.3131898136248,1,-29.3350080576202,0.0333087896417672,"Kerguelen",1.453,"M"
"ct109-942-14.ct109-942-14.5302","ct109-942-14",2015-02-22 17:50:35,47.75,111.511719125925,-65.2991416207997,0,-29.3017518884489,0.0332561691713473,"Kerguelen",1.11,"M"
"ct109-942-14.ct109-942-14.5303","ct109-942-14",2015-02-22 23:50:35,48,111.701584323106,-65.2843786969392,0,-29.2685421465387,0.033209741910134,"Kerguelen",1,"M"
"ct109-942-14.ct109-942-14.5304","ct109-942-14",2015-02-23 05:50:35,48.25,112.208248576496,-65.3136892086857,1,-29.2353644892678,0.033177657270933,"Kerguelen",1,"M"
"ct109-942-14.ct109-942-14.5305","ct109-942-14",2015-02-23 11:50:35,48.5,112.765092425695,-65.3263737977537,1,-29.2022045303309,0.0331599589368459,"Kerguelen",1,"M"
"ct109-942-14.ct109-942-14.5306","ct109-942-14",2015-02-23 17:50:35,48.75,113.135692597921,-65.3299877658188,1,-29.16904787623,0.0331566541009687,"Kerguelen",1.00975,"M"
"ct109-942-14.ct109-942-14.5307","ct109-942-14",2015-02-23 23:50:35,49,113.425602672852,-65.3136144114517,1,-29.1358801259102,0.0331677503198069,"Kerguelen",1.04525,"M"
"ct109-942-14.ct109-942-14.5308","ct109-942-14",2015-02-24 05:50:35,49.25,113.614077105545,-65.2734768387382,1,-29.1026868703915,0.0331932555186876,"Kerguelen",1.2005,"M"
"ct109-942-14.ct109-942-14.5309","ct109-942-14",2015-02-24 11:50:35,49.5,113.562246414072,-65.2287087825611,1,-29.0694536923881,0.0332331780033834,"Kerguelen",1.219,"M"
"ct109-942-14.ct109-942-14.5310","ct109-942-14",2015-02-24 17:50:35,49.75,113.587657517766,-65.1910361539739,0,-29.0361661659218,0.0332875264662746,"Kerguelen",1.23275,"M"
"ct109-942-14.ct109-942-14.5311","ct109-942-14",2015-02-24 23:50:35,50,113.538834719424,-65.1552366329135,0,-29.0028150023818,0.0333511635400074,"Kerguelen",1.241,"M"
"ct109-942-14.ct109-942-14.5312","ct109-942-14",2015-02-25 05:50:35,50.25,113.664951855713,-65.1718590631111,0,-28.9694108345848,0.0334041677970465,"Kerguelen",1.22475,"M"
"ct109-942-14.ct109-942-14.5313","ct109-942-14",2015-02-25 11:50:35,50.5,113.726995302179,-65.1282495515071,0,-28.9359691234066,0.0334417111781393,"Kerguelen",1.206,"M"
"ct109-942-14.ct109-942-14.5314","ct109-942-14",2015-02-25 17:50:35,50.75,113.681503775041,-65.1160478691796,0,-28.9025070272474,0.033462096159198,"Kerguelen",1.159,"M"
"ct109-942-14.ct109-942-14.5315","ct109-942-14",2015-02-25 23:50:35,51,113.825703177149,-65.1235462516937,0,-28.8690554689703,0.0334515582770922,"Kerguelen",1.0235,"M"
"ct109-942-14.ct109-942-14.5316","ct109-942-14",2015-02-26 05:50:35,51.25,114.084549808022,-65.1192915092519,0,-28.8356520913128,0.0334033776574982,"Kerguelen",1.0025,"M"
"ct109-942-14.ct109-942-14.5317","ct109-942-14",2015-02-26 11:50:35,51.5,114.353730095815,-65.0661038880098,0,-28.8023346063688,0.0333174849440177,"Kerguelen",1.00275,"M"
"ct109-942-14.ct109-942-14.5318","ct109-942-14",2015-02-26 17:50:35,51.75,114.457688244001,-64.9632750515525,0,-28.7691407515571,0.0331938548117028,"Kerguelen",1.0005,"M"
"ct109-942-14.ct109-942-14.5319","ct109-942-14",2015-02-26 23:50:35,52,114.512915978989,-64.8452130787057,0,-28.7361082904105,0.033032461146637,"Kerguelen",1.00025,"M"
"ct109-942-14.ct109-942-14.5320","ct109-942-14",2015-02-27 05:50:35,52.25,114.605760986533,-64.7415763840568,0,-28.703275013272,0.0328332771384499,"Kerguelen",1.0005,"M"
"ct109-942-14.ct109-942-14.5321","ct109-942-14",2015-02-27 11:50:35,52.5,114.837238675212,-64.6968776746989,0,-28.670678737899,0.032596275372998,"Kerguelen",1,"M"
"ct109-942-14.ct109-942-14.5322","ct109-942-14",2015-02-27 17:50:35,52.75,115.196029856441,-64.6355439706825,0,-28.6383573099629,0.0323214279361383,"Kerguelen",1,"M"
"ct109-942-14.ct109-942-14.5323","ct109-942-14",2015-02-27 23:50:35,53,115.522054470828,-64.5887020358594,0,-28.6063486034341,0.0320087065287578,"Kerguelen",1,"M"
"ct109-942-14.ct109-942-14.5324","ct109-942-14",2015-02-28 05:50:35,53.25,115.867698770698,-64.6018188929115,0,-28.5746905203961,0.0316580830380553,"Kerguelen",1.005,"M"
"ct109-942-14.ct109-942-14.5325","ct109-942-14",2015-02-28 11:50:35,53.5,116.088155026678,-64.6519971103607,0,-28.5434206385324,0.0312698818637269,"Kerguelen",1.00125,"M"
"ct109-942-14.ct109-942-14.5326","ct109-942-14",2015-02-28 17:50:35,53.75,116.28220296803,-64.7435338261036,0,-28.512575579731,0.030845058801332,"Kerguelen",1,"M"
"ct109-942-14.ct109-942-14.5327","ct109-942-14",2015-02-28 23:50:35,54,116.552044549276,-64.8426293709728,0,-28.4821918234111,0.0303837563199016,"Kerguelen",1,"M"
"ct109-942-14.ct109-942-14.5328","ct109-942-14",2015-03-01 05:50:35,54.25,116.853008269162,-64.9680002887937,0,-28.4523058762892,0.0298859471218882,"Kerguelen",1,"M"
"ct109-942-14.ct109-942-14.5329","ct109-942-14",2015-03-01 11:50:35,54.5,117.188367347364,-65.1359925740843,0,-28.4229542719679,0.0293516043213593,"Kerguelen",1.0055,"M"
"ct109-942-14.ct109-942-14.5330","ct109-942-14",2015-03-01 17:50:35,54.75,117.26245668162,-65.2454765534498,0,-28.3941735703782,0.0287807015896313,"Kerguelen",1.006,"M"
"ct109-942-14.ct109-942-14.5331","ct109-942-14",2015-03-01 23:50:35,55,117.376497605486,-65.3062937184637,0,-28.3660003570715,0.0281732133067258,"Kerguelen",1.00475,"M"
"ct109-942-14.ct109-942-14.5332","ct109-942-14",2015-03-02 05:50:35,55.25,117.567252891023,-65.3277540446097,0,-28.3384712423494,0.0275291147221024,"Kerguelen",1.00075,"M"
"ct109-942-14.ct109-942-14.5333","ct109-942-14",2015-03-02 11:50:35,55.5,117.744782210538,-65.3300667853857,0,-28.3116228602379,0.0268483821115661,"Kerguelen",1.0005,"M"
"ct109-942-14.ct109-942-14.5334","ct109-942-14",2015-03-02 17:50:35,55.75,118.026318691802,-65.3059412383692,0,-28.285488839317,0.0261340209208871,"Kerguelen",1.0025,"M"
"ct109-942-14.ct109-942-14.5335","ct109-942-14",2015-03-02 23:50:35,56,118.164494832168,-65.3387645813391,0,-28.2600844591984,0.0254043801185655,"Kerguelen",1.0055,"M"
"ct109-942-14.ct109-942-14.5336","ct109-942-14",2015-03-03 05:50:35,56.25,118.289338303055,-65.4437380885082,0,-28.2354181167231,0.0246663424752824,"Kerguelen",1.00525,"M"
"ct109-942-14.ct109-942-14.5337","ct109-942-14",2015-03-03 11:50:35,56.5,118.466921377591,-65.5283312656095,0,-28.2114981981411,0.0239199185820049,"Kerguelen",1.01275,"M"
"ct109-942-14.ct109-942-14.5338","ct109-942-14",2015-03-03 17:50:35,56.75,118.646405962361,-65.5697094090285,0,-28.1883330905652,0.0231651075759287,"Kerguelen",1.07825,"M"
"ct109-942-14.ct109-942-14.5339","ct109-942-14",2015-03-03 23:50:35,57,118.839118617606,-65.6204686894501,0,-28.1659312006543,0.0224018899109002,"Kerguelen",1.443,"M"
"ct109-942-14.ct109-942-14.5340","ct109-942-14",2015-03-04 05:50:35,57.25,118.899273692389,-65.6043816145659,0,-28.1443023543813,0.0216288462729586,"Kerguelen",1.572,"M"
"ct109-942-14.ct109-942-14.5341","ct109-942-14",2015-03-04 11:50:35,57.5,118.914109300081,-65.5733151939977,0,-28.1234587382094,0.0208436161719672,"Kerguelen",1.612,"M"
"ct109-942-14.ct109-942-14.5342","ct109-942-14",2015-03-04 17:50:35,57.75,119.017572571978,-65.5586591935688,1,-28.1034127613982,0.0200459768111616,"Kerguelen",1.64675,"M"
"ct109-942-14.ct109-942-14.5343","ct109-942-14",2015-03-04 23:50:35,58,119.196392242257,-65.5894686733865,1,-28.0841768321107,0.0192359292874478,"Kerguelen",1.69075,"M"
"ct109-942-14.ct109-942-14.5344","ct109-942-14",2015-03-05 05:50:35,58.25,119.251305433679,-65.5876705366949,1,-28.0657633564231,0.018413475687673,"Kerguelen",1.719,"M"
"ct109-942-14.ct109-942-14.5345","ct109-942-14",2015-03-05 11:50:35,58.5,119.32162859552,-65.6812525923549,1,-28.0481846850951,0.0175786713279669,"Kerguelen",1.75,"M"
"ct109-942-14.ct109-942-14.5346","ct109-942-14",2015-03-05 17:50:35,58.75,119.316839362332,-65.7818706753432,1,-28.0314487266128,0.0167359584823112,"Kerguelen",1.96225,"M"
"ct109-942-14.ct109-942-14.5347","ct109-942-14",2015-03-05 23:50:35,59,119.312819522236,-65.7419374036544,1,-28.0155556243997,0.0158931022130993,"Kerguelen",1.97325,"M"
"ct109-942-14.ct109-942-14.5348","ct109-942-14",2015-03-06 05:50:35,59.25,119.382199692116,-65.7542080632676,1,-28.0005047287363,0.0150508956634321,"Kerguelen",1.98325,"M"
"ct109-942-14.ct109-942-14.5349","ct109-942-14",2015-03-06 11:50:35,59.5,119.407250872484,-65.6581328306196,1,-27.9862923382232,0.0142123905130853,"Kerguelen",1.9915,"M"
"ct109-942-14.ct109-942-14.5350","ct109-942-14",2015-03-06 17:50:35,59.75,119.322960048082,-65.7002267207406,1,-27.97290420204,0.0133881361831845,"Kerguelen",1.99275,"M"
"ct109-942-14.ct109-942-14.5351","ct109-942-14",2015-03-06 23:50:35,60,119.406529512552,-65.6789718353308,1,-27.9603237712139,0.0125804308260702,"Kerguelen",1.98975,"M"
"ct109-949-14.ct109-949-14.5761","ct109-949-14",2014-12-21 18:45:29,0.25,73.9282463513473,-51.6945623656618,0,-33.1868187524086,-0.0235444313059774,"Kerguelen",1,"M"
"ct109-949-14.ct109-949-14.5762","ct109-949-14",2014-12-22 00:45:29,0.5,74.1493520001104,-51.8230848491345,0,-33.2103740764906,-0.023555324081953,"Kerguelen",1,"M"
"ct109-949-14.ct109-949-14.5763","ct109-949-14",2014-12-22 06:45:29,0.75,74.3947997465884,-51.9738092934119,0,-33.2339452366118,-0.0235711601212829,"Kerguelen",1,"M"
"ct109-949-14.ct109-949-14.5764","ct109-949-14",2014-12-22 12:45:29,1,74.5309355533246,-52.1575803441761,0,-33.2575371783297,-0.023591941717821,"Kerguelen",1,"M"
"ct109-949-14.ct109-949-14.5765","ct109-949-14",2014-12-22 18:45:29,1.25,74.7000128106534,-52.3772989276348,0,-33.2811548495521,-0.0236176712224867,"Kerguelen",1,"M"
"ct109-949-14.ct109-949-14.5766","ct109-949-14",2014-12-23 00:45:29,1.5,74.8988086420774,-52.606186283688,0,-33.3048032006037,-0.0236483510515029,"Kerguelen",1,"M"
"ct109-949-14.ct109-949-14.5767","ct109-949-14",2014-12-23 06:45:29,1.75,75.1115846745615,-52.7769144738095,0,-33.3284871842877,-0.0236839836840197,"Kerguelen",1.02975,"M"
"ct109-949-14.ct109-949-14.5768","ct109-949-14",2014-12-23 12:45:29,2,75.1467024130238,-52.8502680565771,0,-33.3522117559524,-0.0237245716647017,"Kerguelen",1.02025,"M"
"ct109-949-14.ct109-949-14.5769","ct109-949-14",2014-12-23 18:45:29,2.25,75.1800359842834,-52.8703731421897,0,-33.3759818735598,-0.0237701176074134,"Kerguelen",1.00725,"M"
"ct109-949-14.ct109-949-14.5770","ct109-949-14",2014-12-24 00:45:29,2.5,75.3099325763955,-52.9427650835252,0,-33.3998024977515,-0.0238206241917616,"Kerguelen",1.0005,"M"
"ct109-949-14.ct109-949-14.5771","ct109-949-14",2014-12-24 06:45:29,2.75,75.5421513709985,-53.0501721744178,0,-33.4236785919224,-0.0238760941708438,"Kerguelen",1.002,"M"
"ct109-949-14.ct109-949-14.5772","ct109-949-14",2014-12-24 12:45:29,3,75.6056311621869,-53.1152245092094,0,-33.4476151222914,-0.0239365303690342,"Kerguelen",1.0015,"M"
"ct109-949-14.ct109-949-14.5773","ct109-949-14",2014-12-24 18:45:29,3.25,75.6498383712177,-53.1821486207716,0,-33.4716170579798,-0.0240019356884114,"Kerguelen",1.00125,"M"
"ct109-949-14.ct109-949-14.5774","ct109-949-14",2014-12-25 00:45:29,3.5,75.6640243668702,-53.2284478006173,0,-33.4956893710842,-0.0240723131043563,"Kerguelen",1.00025,"M"
"ct109-949-14.ct109-949-14.5775","ct109-949-14",2014-12-25 06:45:29,3.75,75.7309283876605,-53.3614233824689,0,-33.5198370367582,-0.0241476656740569,"Kerguelen",1,"M"
"ct109-949-14.ct109-949-14.5776","ct109-949-14",2014-12-25 12:45:29,4,75.8322822195422,-53.5518862189392,0,-33.5440650332938,-0.0242279965355974,"Kerguelen",1,"M"
"ct109-949-14.ct109-949-14.5777","ct109-949-14",2014-12-25 18:45:29,4.25,76.0233681397567,-53.7034979236532,0,-33.5683758616329,-0.0243108283390192,"Kerguelen",1,"M"
"ct109-949-14.ct109-949-14.5778","ct109-949-14",2014-12-26 00:45:29,4.5,76.0300819286053,-53.9084001436028,0,-33.5927360293775,-0.0243601677446081,"Kerguelen",1,"M"
"ct109-949-14.ct109-949-14.5779","ct109-949-14",2014-12-26 06:45:29,4.75,75.9973138971667,-54.2253525657804,0,-33.61708487874,-0.0243488493625377,"Kerguelen",1,"M"
"ct109-949-14.ct109-949-14.5780","ct109-949-14",2014-12-26 12:45:29,5,76.0461605502645,-54.4378174092713,0,-33.6413610526898,-0.0242761739497499,"Kerguelen",1,"M"
"ct109-949-14.ct109-949-14.5781","ct109-949-14",2014-12-26 18:45:29,5.25,76.2069234645761,-54.5735580631176,0,-33.6655031605522,-0.024142107862396,"Kerguelen",1.0005,"M"
"ct109-949-14.ct109-949-14.5782","ct109-949-14",2014-12-27 00:45:29,5.5,76.2790740593221,-54.6478109504023,0,-33.6894497776356,-0.0239466170834313,"Kerguelen",1,"M"
"ct109-949-14.ct109-949-14.5783","ct109-949-14",2014-12-27 06:45:29,5.75,76.3290432371922,-54.7780234845007,0,-33.7131394450891,-0.0236896674535192,"Kerguelen",1,"M"
"ct109-949-14.ct109-949-14.5784","ct109-949-14",2014-12-27 12:45:29,6,76.4081583701154,-54.9304521735525,0,-33.7365106700155,-0.0233712249263662,"Kerguelen",1,"M"
"ct109-949-14.ct109-949-14.5785","ct109-949-14",2014-12-27 18:45:29,6.25,76.4250046550022,-55.0916767425308,0,-33.7595019685058,-0.0229912984903324,"Kerguelen",1,"M"
"ct109-949-14.ct109-949-14.5786","ct109-949-14",2014-12-28 00:45:29,6.5,76.523781708938,-55.3643425088316,0,-33.7820559240504,-0.0225539555445797,"Kerguelen",1,"M"
"ct109-949-14.ct109-949-14.5787","ct109-949-14",2014-12-28 06:45:29,6.75,76.7509723990976,-55.6018758406634,0,-33.8041225390444,-0.0220666149940596,"Kerguelen",1,"M"
"ct109-949-14.ct109-949-14.5788","ct109-949-14",2014-12-28 12:45:29,7,76.9975516134169,-55.8178155815938,0,-33.8256525789736,-0.0215300399291685,"Kerguelen",1,"M"
"ct109-949-14.ct109-949-14.5789","ct109-949-14",2014-12-28 18:45:29,7.25,77.232462158373,-55.9577882176194,0,-33.8465967859324,-0.0209442069587673,"Kerguelen",1,"M"
"ct109-949-14.ct109-949-14.5790","ct109-949-14",2014-12-29 00:45:29,7.5,77.5221154982175,-56.0859680800804,0,-33.866905880013,-0.0203090940805728,"Kerguelen",1,"M"
"ct109-949-14.ct109-949-14.5791","ct109-949-14",2014-12-29 06:45:29,7.75,77.6921342026891,-56.302416204276,0,-33.8865305609117,-0.0196246808987,"Kerguelen",1,"M"
"ct109-949-14.ct109-949-14.5792","ct109-949-14",2014-12-29 12:45:29,8,77.6850164097152,-56.5161837285082,0,-33.905421509746,-0.0188909488343936,"Kerguelen",1,"M"
"ct109-949-14.ct109-949-14.5793","ct109-949-14",2014-12-29 18:45:29,8.25,77.7623123661251,-56.7069481546379,0,-33.9235293910982,-0.018107881352164,"Kerguelen",1,"M"
"ct109-949-14.ct109-949-14.5794","ct109-949-14",2014-12-30 00:45:29,8.5,77.7593414003344,-56.8655748369951,0,-33.9408041619823,-0.0172747708841292,"Kerguelen",1,"M"
"ct109-949-14.ct109-949-14.5795","ct109-949-14",2014-12-30 06:45:29,8.75,77.7763617140774,-57.0963080531687,0,-33.9571924572518,-0.0163882952694705,"Kerguelen",1,"M"
"ct109-949-14.ct109-949-14.5796","ct109-949-14",2014-12-30 12:45:29,9,77.8999744422722,-57.3297394988954,0,-33.972639914382,-0.0154474571302188,"Kerguelen",1.013,"M"
"ct109-949-14.ct109-949-14.5797","ct109-949-14",2014-12-30 18:45:29,9.25,78.061380068524,-57.4101234019236,0,-33.9870921628627,-0.0144522484806731,"Kerguelen",1.0035,"M"
"ct109-949-14.ct109-949-14.5798","ct109-949-14",2014-12-31 00:45:29,9.5,78.164946967994,-57.4720637262452,0,-34.000494827833,-0.0134026649703356,"Kerguelen",1.00075,"M"
"ct109-949-14.ct109-949-14.5799","ct109-949-14",2014-12-31 06:45:29,9.75,78.355967952238,-57.5382444845958,0,-34.0127935338017,-0.0122987059686663,"Kerguelen",1.0005,"M"
"ct109-949-14.ct109-949-14.5800","ct109-949-14",2014-12-31 12:45:29,10,78.4139014044003,-57.6877255179271,0,-34.0239339086158,-0.0111403748141115,"Kerguelen",1.00025,"M"
"ct109-949-14.ct109-949-14.5801","ct109-949-14",2014-12-31 18:45:29,10.25,78.4428276625014,-57.7749907125686,0,-34.0338633999889,-0.00992949137307297,"Kerguelen",1.00025,"M"
"ct109-949-14.ct109-949-14.5802","ct109-949-14",2015-01-01 00:45:29,10.5,78.5404533382504,-57.864551966221,0,-34.0425367895649,-0.00867338957605268,"Kerguelen",1,"M"
"ct109-949-14.ct109-949-14.5803","ct109-949-14",2015-01-01 06:45:29,10.75,78.588747040999,-58.0134349618285,0,-34.0499107258673,-0.00737393630239058,"Kerguelen",1,"M"
"ct109-949-14.ct109-949-14.5804","ct109-949-14",2015-01-01 12:45:29,11,78.6380253584552,-58.1552465557208,0,-34.0559418800318,-0.00603115416448197,"Kerguelen",1,"M"
"ct109-949-14.ct109-949-14.5805","ct109-949-14",2015-01-01 18:45:29,11.25,78.7125376698325,-58.2573769671772,0,-34.0605869498147,-0.00464506978284374,"Kerguelen",1,"M"
"ct109-949-14.ct109-949-14.5806","ct109-949-14",2015-01-02 00:45:29,11.5,78.8056332551975,-58.3996053715433,0,-34.0638026637004,-0.00321571388572917,"Kerguelen",1,"M"
"ct109-949-14.ct109-949-14.5807","ct109-949-14",2015-01-02 06:45:29,11.75,78.8657124943349,-58.5440893426334,0,-34.0655457850817,-0.00174312138135901,"Kerguelen",1.0015,"M"
"ct109-949-14.ct109-949-14.5808","ct109-949-14",2015-01-02 12:45:29,12,78.8414103412855,-58.6586627109418,0,-34.0657731165001,-0.00022733141838982,"Kerguelen",1.00875,"M"
"ct109-949-14.ct109-949-14.5809","ct109-949-14",2015-01-02 18:45:29,12.25,78.8634061312453,-58.6826248720293,0,-34.064441503928,0.00133161257213632,"Kerguelen",1.00525,"M"
"ct109-949-14.ct109-949-14.5810","ct109-949-14",2015-01-03 00:45:29,12.5,78.8040083386269,-58.7449280033383,0,-34.0615078410654,0.00293366286254759,"Kerguelen",1.00175,"M"
"ct109-949-14.ct109-949-14.5811","ct109-949-14",2015-01-03 06:45:29,12.75,78.8808702923174,-58.8806668730672,0,-34.0569290736402,0.0045787674252451,"Kerguelen",1.00075,"M"
"ct109-949-14.ct109-949-14.5812","ct109-949-14",2015-01-03 12:45:29,13,78.9936855446519,-58.9735535069344,0,-34.0506622036772,0.00626686996302306,"Kerguelen",1.00375,"M"
"ct109-949-14.ct109-949-14.5813","ct109-949-14",2015-01-03 18:45:29,13.25,79.0305527945025,-59.0108731841442,0,-34.0426642937198,0.0079979099573968,"Kerguelen",1.002,"M"
"ct109-949-14.ct109-949-14.5814","ct109-949-14",2015-01-04 00:45:29,13.5,78.9844939112066,-59.0619934757347,0,-34.0328924709662,0.00977182275354593,"Kerguelen",1.00025,"M"
"ct109-949-14.ct109-949-14.5815","ct109-949-14",2015-01-04 06:45:29,13.75,78.9935609045364,-59.2013234040833,0,-34.0213039313031,0.0115885396631321,"Kerguelen",1,"M"
"ct109-949-14.ct109-949-14.5816","ct109-949-14",2015-01-04 12:45:29,14,79.2645134881413,-59.4234359737982,0,-34.007855943197,0.0134479881061467,"Kerguelen",1.015,"M"
"ct109-949-14.ct109-949-14.5817","ct109-949-14",2015-01-04 18:45:29,14.25,79.3700193180604,-59.539744888721,0,-33.9925043773936,0.015351565803351,"Kerguelen",1.04625,"M"
"ct109-949-14.ct109-949-14.5818","ct109-949-14",2015-01-05 00:45:29,14.5,79.4349470303494,-59.555058553957,0,-33.9752286612899,0.017275716103754,"Kerguelen",1.0355,"M"
"ct109-949-14.ct109-949-14.5819","ct109-949-14",2015-01-05 06:45:29,14.75,79.5006934648749,-59.6435749100798,0,-33.9560626993429,0.0191659619469597,"Kerguelen",1.00025,"M"
"ct109-949-14.ct109-949-14.5820","ct109-949-14",2015-01-05 12:45:29,15,79.5569065902872,-59.8157258782757,0,-33.9350457745012,0.0210169248416658,"Kerguelen",1,"M"
"ct109-949-14.ct109-949-14.5821","ct109-949-14",2015-01-05 18:45:29,15.25,79.5858638896463,-60.0415732118187,0,-33.9122172053756,0.0228285691256214,"Kerguelen",1,"M"
"ct109-949-14.ct109-949-14.5822","ct109-949-14",2015-01-06 00:45:29,15.5,79.6569100019836,-60.3168709097114,0,-33.8876163399952,0.0246008653804197,"Kerguelen",1,"M"
"ct109-949-14.ct109-949-14.5823","ct109-949-14",2015-01-06 06:45:29,15.75,79.8031441785064,-60.5677518915758,0,-33.861282549657,0.0263337903381511,"Kerguelen",1,"M"
"ct109-949-14.ct109-949-14.5824","ct109-949-14",2015-01-06 12:45:29,16,80.1176932960111,-60.789001847362,0,-33.8332552229032,0.0280273267538378,"Kerguelen",1,"M"
"ct109-949-14.ct109-949-14.5825","ct109-949-14",2015-01-06 18:45:29,16.25,80.31384507614,-60.9671708995114,0,-33.8035737596366,0.0296814632666009,"Kerguelen",1,"M"
"ct109-949-14.ct109-949-14.5826","ct109-949-14",2015-01-07 00:45:29,16.5,80.4070766998869,-61.1787880216841,0,-33.7722775654016,0.031296194235042,"Kerguelen",1,"M"
"ct109-949-14.ct109-949-14.5827","ct109-949-14",2015-01-07 06:45:29,16.75,80.7172715145614,-61.422080742053,0,-33.7394060458375,0.0328715195640927,"Kerguelen",1.98825,"M"
"ct109-949-14.ct109-949-14.5828","ct109-949-14",2015-01-07 12:45:29,17,80.8041124964899,-61.4733648323239,0,-33.7049986013335,0.0344074445040032,"Kerguelen",1.99675,"M"
"ct109-949-14.ct109-949-14.5829","ct109-949-14",2015-01-07 18:45:29,17.25,80.819040803679,-61.4610450366033,0,-33.6691008825757,0.035897718757727,"Kerguelen",1.99775,"M"
"ct109-949-14.ct109-949-14.5830","ct109-949-14",2015-01-08 00:45:29,17.5,80.7646505601059,-61.4464581488926,0,-33.6318119273416,0.0372889552341771,"Kerguelen",1.99825,"M"
"ct109-949-14.ct109-949-14.5831","ct109-949-14",2015-01-08 06:45:29,17.75,80.8677994740935,-61.5007408029727,0,-33.5932472479015,0.0385646794400563,"Kerguelen",1.99725,"M"
"ct109-949-14.ct109-949-14.5832","ct109-949-14",2015-01-08 12:45:29,18,80.8661132161922,-61.4831349539183,0,-33.5534696183775,0.0397776295239849,"Kerguelen",1.995,"M"
"ct109-949-14.ct109-949-14.5833","ct109-949-14",2015-01-08 18:45:29,18.25,80.8720294338565,-61.4835817169173,0,-33.5125251599773,0.0409444584002661,"Kerguelen",1.99275,"M"
"ct109-949-14.ct109-949-14.5834","ct109-949-14",2015-01-09 00:45:29,18.5,80.9082263376564,-61.4712274859503,0,-33.4704524391376,0.0420727208396365,"Kerguelen",1.99025,"M"
"ct109-949-14.ct109-949-14.5835","ct109-949-14",2015-01-09 06:45:29,18.75,80.8503369184131,-61.4436116253818,0,-33.4272883280047,0.0431641111328984,"Kerguelen",1.98825,"M"
"ct109-949-14.ct109-949-14.5836","ct109-949-14",2015-01-09 12:45:29,19,80.8184177441064,-61.3805123181128,0,-33.3830696604199,0.044218667584861,"Kerguelen",1.9905,"M"
"ct109-949-14.ct109-949-14.5837","ct109-949-14",2015-01-09 18:45:29,19.25,80.8518930121288,-61.3536072735594,0,-33.3378350497273,0.0452346106925239,"Kerguelen",1.99275,"M"
"ct109-949-14.ct109-949-14.5838","ct109-949-14",2015-01-10 00:45:29,19.5,80.7879886717536,-61.3655567199633,0,-33.2916333502007,0.0462016995266379,"Kerguelen",1.99375,"M"
"ct109-949-14.ct109-949-14.5839","ct109-949-14",2015-01-10 06:45:29,19.75,80.8521025612334,-61.3808705714574,0,-33.2445169699074,0.0471163802932884,"Kerguelen",1.9925,"M"
"ct109-949-14.ct109-949-14.5840","ct109-949-14",2015-01-10 12:45:29,20,80.8249771596534,-61.4847438115332,0,-33.1965382607913,0.0479787091161421,"Kerguelen",1.99475,"M"
"ct109-949-14.ct109-949-14.5841","ct109-949-14",2015-01-10 18:45:29,20.25,80.8946119359037,-61.3829815671598,0,-33.1477495136913,0.0487887470999593,"Kerguelen",1.92175,"M"
"ct109-949-14.ct109-949-14.5842","ct109-949-14",2015-01-11 00:45:29,20.5,80.9067410096735,-61.3858893785904,0,-33.0982029576655,0.0495465560257757,"Kerguelen",1.418,"M"
"ct109-949-14.ct109-949-14.5843","ct109-949-14",2015-01-11 06:45:29,20.75,81.0153849388009,-61.5743067636981,0,-33.0479507596774,0.0502521979881043,"Kerguelen",1.06175,"M"
"ct109-949-14.ct109-949-14.5844","ct109-949-14",2015-01-11 12:45:29,21,80.9992719996648,-61.7319003630701,0,-32.9970450246382,0.0509057350392528,"Kerguelen",1.0755,"M"
"ct109-949-14.ct109-949-14.5845","ct109-949-14",2015-01-11 18:45:29,21.25,81.0722267703827,-61.801190007231,0,-32.9455367335885,0.0515082910496623,"Kerguelen",1.07625,"M"
"ct109-949-14.ct109-949-14.5846","ct109-949-14",2015-01-12 00:45:29,21.5,81.1515432333059,-61.8151383629533,0,-32.8934626617028,0.0520740718856716,"Kerguelen",1.07375,"M"
"ct109-949-14.ct109-949-14.5847","ct109-949-14",2015-01-12 06:45:29,21.75,81.3734471656855,-61.8484384359843,0,-32.8408586900538,0.0526039716490179,"Kerguelen",1.07925,"M"
"ct109-949-14.ct109-949-14.5848","ct109-949-14",2015-01-12 12:45:29,22,81.6447310760165,-61.8394934417286,0,-32.7877631542605,0.0530955357933238,"Kerguelen",1.33225,"M"
"ct109-949-14.ct109-949-14.5849","ct109-949-14",2015-01-12 18:45:29,22.25,81.6228156008512,-61.8486202692092,0,-32.7342145539934,0.0535486002670782,"Kerguelen",1.31,"M"
"ct109-949-14.ct109-949-14.5850","ct109-949-14",2015-01-13 00:45:29,22.5,81.626423813067,-61.8300301341372,0,-32.6802526794991,0.0539618744943293,"Kerguelen",1.276,"M"
"ct109-949-14.ct109-949-14.5851","ct109-949-14",2015-01-13 06:45:29,22.75,81.5921752435698,-61.8564768760949,0,-32.6259177973094,0.0543348821897049,"Kerguelen",1.2105,"M"
"ct109-949-14.ct109-949-14.5852","ct109-949-14",2015-01-13 12:45:29,23,81.6856228296175,-61.9121196149103,0,-32.5712501306721,0.0546676666372425,"Kerguelen",1.12125,"M"
"ct109-949-14.ct109-949-14.5853","ct109-949-14",2015-01-13 18:45:29,23.25,81.8622983484152,-61.9069099260264,0,-32.5162894551984,0.0549606754737364,"Kerguelen",1.0415,"M"
"ct109-949-14.ct109-949-14.5854","ct109-949-14",2015-01-14 00:45:29,23.5,82.0068982926407,-61.9343976200929,0,-32.4610710509249,0.055218404273466,"Kerguelen",1.00175,"M"
"ct109-949-14.ct109-949-14.5855","ct109-949-14",2015-01-14 06:45:29,23.75,82.2841550263651,-61.9850592357302,0,-32.4056274035129,0.0554436474120512,"Kerguelen",1,"M"
"ct109-949-14.ct109-949-14.5856","ct109-949-14",2015-01-14 12:45:29,24,82.6228409351631,-62.0141640391822,0,-32.3499909257495,0.0556364777634377,"Kerguelen",1.00325,"M"
"ct109-949-14.ct109-949-14.5857","ct109-949-14",2015-01-14 18:45:29,24.25,82.7775570703391,-62.0298342839305,0,-32.2941940004434,0.0557969253060675,"Kerguelen",1.00125,"M"
"ct109-949-14.ct109-949-14.5858","ct109-949-14",2015-01-15 00:45:29,24.5,82.8999845521958,-62.0758881622124,0,-32.2382689822836,0.0559250181597692,"Kerguelen",1,"M"
"ct109-949-14.ct109-949-14.5859","ct109-949-14",2015-01-15 06:45:29,24.75,83.2967680886847,-62.2204835042544,0,-32.1822481997755,0.0560207825081038,"Kerguelen",1,"M"
"ct109-949-14.ct109-949-14.5860","ct109-949-14",2015-01-15 12:45:29,25,83.7874470149997,-62.354778112476,0,-32.1261639572373,0.0560842425382291,"Kerguelen",1,"M"
"ct109-949-14.ct109-949-14.5861","ct109-949-14",2015-01-15 18:45:29,25.25,84.255302207513,-62.3744722197228,0,-32.0700485368514,0.0561154203859104,"Kerguelen",1.00025,"M"
"ct109-949-14.ct109-949-14.5862","ct109-949-14",2015-01-16 00:45:29,25.5,84.5817193927328,-62.3485608998212,0,-32.0139342007655,0.0561143360859162,"Kerguelen",1.002,"M"
"ct109-949-14.ct109-949-14.5863","ct109-949-14",2015-01-16 06:45:29,25.75,84.8536452914249,-62.3835183488767,0,-31.957853193226,0.0560810075394158,"Kerguelen",1.03025,"M"
"ct109-949-14.ct109-949-14.5864","ct109-949-14",2015-01-16 12:45:29,26,85.1266199014757,-62.4443701071075,0,-31.9018377427472,0.0560154504788357,"Kerguelen",1.748,"M"
"ct109-949-14.ct109-949-14.5865","ct109-949-14",2015-01-16 18:45:29,26.25,85.3183006596072,-62.3035537046975,0,-31.8459200642974,0.0559176784498017,"Kerguelen",1.9015,"M"
"ct109-949-14.ct109-949-14.5866","ct109-949-14",2015-01-17 00:45:29,26.5,85.3536094874957,-62.2858353724212,0,-31.7901323615024,0.0557877027949794,"Kerguelen",1.92975,"M"
"ct109-949-14.ct109-949-14.5867","ct109-949-14",2015-01-17 06:45:29,26.75,85.5178800628925,-62.2381898720775,0,-31.7345068288468,0.0556255326555954,"Kerguelen",1.97625,"M"
"ct109-949-14.ct109-949-14.5868","ct109-949-14",2015-01-17 12:45:29,27,85.5315674522602,-62.2998472165077,0,-31.6790738971707,0.0554329316761637,"Kerguelen",1.98075,"M"
"ct109-949-14.ct109-949-14.5869","ct109-949-14",2015-01-17 18:45:29,27.25,85.3374320516633,-62.3130251766036,0,-31.6238534817083,0.0552204154623481,"Kerguelen",1.9855,"M"
"ct109-949-14.ct109-949-14.5870","ct109-949-14",2015-01-18 00:45:29,27.5,85.7459158862812,-62.3320332370271,0,-31.5688616062321,0.0549918754762513,"Kerguelen",1.00025,"M"
"ct109-949-14.ct109-949-14.5871","ct109-949-14",2015-01-18 06:45:29,27.75,86.310354127546,-62.3429365629934,0,-31.5141142915907,0.0547473146413235,"Kerguelen",1.00225,"M"
"ct109-949-14.ct109-949-14.5872","ct109-949-14",2015-01-18 12:45:29,28,86.5783984857126,-62.3511988704278,0,-31.4596275630545,0.054486728536246,"Kerguelen",1.00025,"M"
"ct109-949-14.ct109-949-14.5873","ct109-949-14",2015-01-18 18:45:29,28.25,86.7951658021718,-62.4123015906663,0,-31.4054186368728,0.0542089261816814,"Kerguelen",1,"M"
"ct109-949-14.ct109-949-14.5874","ct109-949-14",2015-01-19 00:45:29,28.5,87.1871973722231,-62.5782981170882,0,-31.3515142519626,0.0539043849102527,"Kerguelen",1,"M"
"ct109-949-14.ct109-949-14.5875","ct109-949-14",2015-01-19 06:45:29,28.75,87.5944293890433,-62.7688934334283,0,-31.2979457323922,0.0535685195703239,"Kerguelen",1,"M"
"ct109-949-14.ct109-949-14.5876","ct109-949-14",2015-01-19 12:45:29,29,87.9803208874948,-62.9332928960424,0,-31.2447444380498,0.0532012943424809,"Kerguelen",1,"M"
"ct109-949-14.ct109-949-14.5877","ct109-949-14",2015-01-19 18:45:29,29.25,88.3734339403543,-63.0800109725394,0,-31.1919417372281,0.0528027008216692,"Kerguelen",1,"M"
"ct109-949-14.ct109-949-14.5878","ct109-949-14",2015-01-20 00:45:29,29.5,88.6434041776369,-63.2164823812985,0,-31.1395690084114,0.052372728816652,"Kerguelen",1,"M"
"ct109-949-14.ct109-949-14.5879","ct109-949-14",2015-01-20 06:45:29,29.75,88.9330251400287,-63.41554823011,0,-31.0876576419883,0.0519113664231297,"Kerguelen",1.00025,"M"
"ct109-949-14.ct109-949-14.5880","ct109-949-14",2015-01-20 12:45:29,30,89.1000748616505,-63.5629623485681,0,-31.0362390418881,0.0514186001002503,"Kerguelen",1,"M"
"ct109-949-14.ct109-949-14.5881","ct109-949-14",2015-01-20 18:45:29,30.25,89.3165413323316,-63.7509961730152,0,-30.9853446271254,0.0508944147626977,"Kerguelen",1,"M"
"ct109-949-14.ct109-949-14.5882","ct109-949-14",2015-01-21 00:45:29,30.5,89.5147099153262,-63.8922645379776,0,-30.9350058315038,0.0503387956215906,"Kerguelen",1,"M"
"ct109-949-14.ct109-949-14.5883","ct109-949-14",2015-01-21 06:45:29,30.75,89.8556525895496,-64.0447636796996,0,-30.8852398020704,0.0497660294333568,"Kerguelen",1.001,"M"
"ct109-949-14.ct109-949-14.5884","ct109-949-14",2015-01-21 12:45:29,31,90.0327900222868,-64.1068464513906,0,-30.8360147672423,0.0492250348281209,"Kerguelen",1,"M"
"ct109-949-14.ct109-949-14.5885","ct109-949-14",2015-01-21 18:45:29,31.25,90.3476518703095,-64.265857532834,0,-30.7872885149033,0.0487262523390264,"Kerguelen",1,"M"
"ct109-949-14.ct109-949-14.5886","ct109-949-14",2015-01-22 00:45:29,31.5,90.8444122239645,-64.384741425568,0,-30.7390188457801,0.0482696691231355,"Kerguelen",1,"M"
"ct109-949-14.ct109-949-14.5887","ct109-949-14",2015-01-22 06:45:29,31.75,91.4871195499792,-64.5128335504764,0,-30.6911635709848,0.0478552747953165,"Kerguelen",1,"M"
"ct109-949-14.ct109-949-14.5888","ct109-949-14",2015-01-22 12:45:29,32,92.086558953179,-64.5918239113418,0,-30.643680509672,0.0474830613128474,"Kerguelen",1,"M"
"ct109-949-14.ct109-949-14.5889","ct109-949-14",2015-01-22 18:45:29,32.25,92.5014471945816,-64.5971580835084,0,-30.596527486787,0.0471530228849937,"Kerguelen",1.0075,"M"
"ct109-949-14.ct109-949-14.5890","ct109-949-14",2015-01-23 00:45:29,32.5,92.6517363559486,-64.5599718531987,0,-30.5496623309037,0.0468651558832467,"Kerguelen",1.01,"M"
"ct109-949-14.ct109-949-14.5891","ct109-949-14",2015-01-23 06:45:29,32.75,92.724689437422,-64.4796200799505,0,-30.5030428721273,0.0466194587764091,"Kerguelen",1.001,"M"
"ct109-949-14.ct109-949-14.5892","ct109-949-14",2015-01-23 12:45:29,33,92.6215139550173,-64.3105618387694,0,-30.456626940053,0.0464159320743451,"Kerguelen",1,"M"
"ct109-949-14.ct109-949-14.5893","ct109-949-14",2015-01-23 18:45:29,33.25,92.7715090740014,-64.1002242668452,0,-30.4103723617695,0.0462545782834667,"Kerguelen",1,"M"
"ct109-949-14.ct109-949-14.5894","ct109-949-14",2015-01-24 00:45:29,33.5,93.0970296861673,-63.9609547332769,0,-30.3642369598858,0.0461354018837012,"Kerguelen",1.0005,"M"
"ct109-949-14.ct109-949-14.5895","ct109-949-14",2015-01-24 06:45:29,33.75,93.1062075767913,-63.8235558905136,0,-30.3181785505789,0.0460584093068539,"Kerguelen",1,"M"
"ct109-949-14.ct109-949-14.5896","ct109-949-14",2015-01-24 12:45:29,34,93.2014197828851,-63.637244537092,0,-30.272154941642,0.0460236089369903,"Kerguelen",1,"M"
"ct109-949-14.ct109-949-14.5897","ct109-949-14",2015-01-24 18:45:29,34.25,93.3683931017177,-63.4797725289363,0,-30.2261238884503,0.0460310531916197,"Kerguelen",1.0005,"M"
"ct109-949-14.ct109-949-14.5898","ct109-949-14",2015-01-25 00:45:29,34.5,93.4683610254247,-63.3624436015937,0,-30.1800373470816,0.0460865413687728,"Kerguelen",1.00175,"M"
"ct109-949-14.ct109-949-14.5899","ct109-949-14",2015-01-25 06:45:29,34.75,93.4712053563803,-63.291891341967,0,-30.1338356222498,0.0462017248318014,"Kerguelen",1.00075,"M"
"ct109-949-14.ct109-949-14.5900","ct109-949-14",2015-01-25 12:45:29,35,93.3841029090884,-63.2184922876415,0,-30.0874576022151,0.046378020034632,"Kerguelen",1.00075,"M"
"ct109-949-14.ct109-949-14.5901","ct109-949-14",2015-01-25 18:45:29,35.25,93.5726879891928,-63.0886801700882,0,-30.040842148966,0.0466154532490992,"Kerguelen",1,"M"
"ct109-949-14.ct109-949-14.5902","ct109-949-14",2015-01-26 00:45:29,35.5,93.7767059267073,-62.9655832360094,0,-29.9939280949475,0.0469140540185708,"Kerguelen",1.00325,"M"
"ct109-949-14.ct109-949-14.5903","ct109-949-14",2015-01-26 06:45:29,35.75,93.911373974778,-62.883730939661,0,-29.946654239608,0.0472738553394192,"Kerguelen",1.00325,"M"
"ct109-949-14.ct109-949-14.5904","ct109-949-14",2015-01-26 12:45:29,36,93.9817571941337,-62.8373862107488,0,-29.8989593358676,0.0476949037404417,"Kerguelen",1.001,"M"
"ct109-949-14.ct109-949-14.5905","ct109-949-14",2015-01-26 18:45:29,36.25,94.1099201503793,-62.7911088486623,0,-29.8507804970715,0.0481788387961146,"Kerguelen",1.0005,"M"
"ct109-949-14.ct109-949-14.5906","ct109-949-14",2015-01-27 00:45:29,36.5,94.1889477714983,-62.7258751597621,0,-29.8020480893101,0.0487324077613704,"Kerguelen",1.00075,"M"
"ct109-949-14.ct109-949-14.5907","ct109-949-14",2015-01-27 06:45:29,36.75,94.127652903076,-62.619342625911,0,-29.7526901023653,0.049357986944859,"Kerguelen",1.00025,"M"
"ct109-949-14.ct109-949-14.5908","ct109-949-14",2015-01-27 12:45:29,37,94.0060502322844,-62.5146003690211,0,-29.7026344590046,0.0500556433606691,"Kerguelen",1.00375,"M"
"ct109-949-14.ct109-949-14.5909","ct109-949-14",2015-01-27 18:45:29,37.25,93.8767438180612,-62.4744062675102,0,-29.6518090157108,0.0508254432937394,"Kerguelen",1.0085,"M"
"ct109-949-14.ct109-949-14.5910","ct109-949-14",2015-01-28 00:45:29,37.5,93.9397635461335,-62.4107637534194,0,-29.6001415561205,0.0516674595903377,"Kerguelen",1.007,"M"
"ct109-949-14.ct109-949-14.5911","ct109-949-14",2015-01-28 06:45:29,37.75,93.9314096823492,-62.3531637535658,0,-29.5475597838944,0.0525817722260846,"Kerguelen",1.0065,"M"
"ct109-949-14.ct109-949-14.5912","ct109-949-14",2015-01-28 12:45:29,38,94.042390213278,-62.2962323310937,0,-29.4939913149549,0.0535684689395022,"Kerguelen",1.00525,"M"
"ct109-949-14.ct109-949-14.5913","ct109-949-14",2015-01-28 18:45:29,38.25,94.1642291832514,-62.2358466229366,0,-29.4393636690378,0.0546276459170936,"Kerguelen",1.01325,"M"
"ct109-949-14.ct109-949-14.5914","ct109-949-14",2015-01-29 00:45:29,38.5,94.2991994524432,-62.1995375635438,0,-29.3836046326733,0.0557590363645166,"Kerguelen",1.0365,"M"
"ct109-949-14.ct109-949-14.5915","ct109-949-14",2015-01-29 06:45:29,38.75,94.1892979604251,-62.1542244627633,0,-29.3266481467748,0.0569564858985017,"Kerguelen",1.0295,"M"
"ct109-949-14.ct109-949-14.5916","ct109-949-14",2015-01-29 12:45:29,39,94.2176202920295,-62.0653040030719,0,-29.2684332438057,0.0582149029690837,"Kerguelen",1.0075,"M"
"ct109-949-14.ct109-949-14.5917","ct109-949-14",2015-01-29 18:45:29,39.25,94.281069665744,-61.9658186043187,0,-29.2088989877869,0.0595342560187784,"Kerguelen",1.00625,"M"
"ct109-949-14.ct109-949-14.5918","ct109-949-14",2015-01-30 00:45:29,39.5,94.2939485042992,-61.884077617491,0,-29.1479843048204,0.0609146829665896,"Kerguelen",1.005,"M"
"ct109-949-14.ct109-949-14.5919","ct109-949-14",2015-01-30 06:45:29,39.75,94.2867986257541,-61.8051502568898,0,-29.0856279709027,0.062356333917668,"Kerguelen",1.0115,"M"
"ct109-949-14.ct109-949-14.5920","ct109-949-14",2015-01-30 12:45:29,40,94.2570039870479,-61.8121335288274,0,-29.0217685987197,0.0638593721829839,"Kerguelen",1.005,"M"
"ct109-949-14.ct109-949-14.5921","ct109-949-14",2015-01-30 18:45:29,40.25,93.9974196476559,-61.8112412935302,0,-28.9563446233535,0.0654239753661912,"Kerguelen",1.0005,"M"
"ct109-949-14.ct109-949-14.5922","ct109-949-14",2015-01-31 00:45:29,40.5,93.7482873832068,-61.8023905550833,0,-28.8892942868078,0.0670503365457376,"Kerguelen",1,"M"
"ct109-949-14.ct109-949-14.5923","ct109-949-14",2015-01-31 06:45:29,40.75,93.5584934142885,-61.7685739885456,0,-28.8205559857489,0.0687383010588349,"Kerguelen",1.001,"M"
"ct109-949-14.ct109-949-14.5924","ct109-949-14",2015-01-31 12:45:29,41,93.4358869014433,-61.7798474439486,0,-28.7501049009899,0.0704510847590656,"Kerguelen",1.002,"M"
"ct109-949-14.ct109-949-14.5925","ct109-949-14",2015-01-31 18:45:29,41.25,93.246706661597,-61.7219744974715,0,-28.6780297640337,0.0720751369561623,"Kerguelen",1.00175,"M"
"ct109-949-14.ct109-949-14.5926","ct109-949-14",2015-02-01 00:45:29,41.5,93.0266775159847,-61.7067506969056,0,-28.6044511214268,0.0735786426069418,"Kerguelen",1.00975,"M"
"ct109-949-14.ct109-949-14.5927","ct109-949-14",2015-02-01 06:45:29,41.75,92.8779461396485,-61.7202745525305,0,-28.5294896180783,0.0749615033485085,"Kerguelen",1.02675,"M"
"ct109-949-14.ct109-949-14.5928","ct109-949-14",2015-02-01 12:45:29,42,92.7700252809752,-61.7384269548933,0,-28.4532659520924,0.076223665985875,"Kerguelen",1.04575,"M"
"ct109-949-14.ct109-949-14.5929","ct109-949-14",2015-02-01 18:45:29,42.25,92.702628310518,-61.7270006789077,0,-28.3759003181918,0.0773656339006223,"Kerguelen",1.058,"M"
"ct109-949-14.ct109-949-14.5930","ct109-949-14",2015-02-02 00:45:29,42.5,92.6563581930848,-61.6889177292793,0,-28.2975080836642,0.0783922345275467,"Kerguelen",1.0755,"M"
"ct109-949-14.ct109-949-14.5931","ct109-949-14",2015-02-02 06:45:29,42.75,92.7241493092253,-61.6958554854168,0,-28.2182022266859,0.0793058569783123,"Kerguelen",1.068,"M"
"ct109-949-14.ct109-949-14.5932","ct109-949-14",2015-02-02 12:45:29,43,92.6149420837543,-61.6641645128885,0,-28.1380958258291,0.0801064008568053,"Kerguelen",1.04375,"M"
"ct109-949-14.ct109-949-14.5933","ct109-949-14",2015-02-02 18:45:29,43.25,92.3700545511056,-61.658292833633,0,-28.0573021002044,0.0807937256246616,"Kerguelen",1.04325,"M"
"ct109-949-14.ct109-949-14.5934","ct109-949-14",2015-02-03 00:45:29,43.5,92.2270267274869,-61.6401993874635,0,-27.9759344038159,0.0813676963885679,"Kerguelen",1.04425,"M"
"ct109-949-14.ct109-949-14.5935","ct109-949-14",2015-02-03 06:45:29,43.75,92.1881242804128,-61.6102416449625,0,-27.8941006293051,0.0818337745108144,"Kerguelen",1.03025,"M"
"ct109-949-14.ct109-949-14.5936","ct109-949-14",2015-02-03 12:45:29,44,92.0729829421014,-61.607931675344,0,-27.8118962745497,0.0822043547553608,"Kerguelen",1.01225,"M"
"ct109-949-14.ct109-949-14.5937","ct109-949-14",2015-02-03 18:45:29,44.25,91.8982857440165,-61.6317548238771,0,-27.7294153164824,0.0824809580672881,"Kerguelen",1.0005,"M"
"ct109-949-14.ct109-949-14.5938","ct109-949-14",2015-02-04 00:45:29,44.5,91.6354249348985,-61.6638092646043,0,-27.6467519262563,0.0826633902260787,"Kerguelen",1,"M"
"ct109-949-14.ct109-949-14.5939","ct109-949-14",2015-02-04 06:45:29,44.75,91.3555985277327,-61.7511934713976,0,-27.5640004864682,0.0827514397881313,"Kerguelen",1.00025,"M"
"ct109-949-14.ct109-949-14.5940","ct109-949-14",2015-02-04 12:45:29,45,91.203663673888,-61.8325390245833,0,-27.4812556080757,0.0827448783924545,"Kerguelen",1.0005,"M"
"ct109-949-14.ct109-949-14.5941","ct109-949-14",2015-02-04 18:45:29,45.25,90.963550005696,-61.8458498814785,0,-27.3986121468909,0.0826434611848004,"Kerguelen",1.0005,"M"
"ct109-949-14.ct109-949-14.5942","ct109-949-14",2015-02-05 00:45:29,45.5,90.7194418120458,-61.9066852057988,0,-27.3161652195233,0.0824469273676187,"Kerguelen",1.00025,"M"
"ct109-949-14.ct109-949-14.5943","ct109-949-14",2015-02-05 06:45:29,45.75,90.4822749756793,-61.9811254797123,0,-27.2340102186356,0.0821550008876903,"Kerguelen",1,"M"
"ct109-949-14.ct109-949-14.5944","ct109-949-14",2015-02-05 12:45:29,46,90.1593380796984,-62.0322607977998,0,-27.1522378160385,0.0817724025971245,"Kerguelen",1,"M"
"ct109-949-14.ct109-949-14.5945","ct109-949-14",2015-02-05 18:45:29,46.25,89.87626802466,-62.024742769453,0,-27.0709150315302,0.0813227845082809,"Kerguelen",1.00025,"M"
"ct109-949-14.ct109-949-14.5946","ct109-949-14",2015-02-06 00:45:29,46.5,89.6429162639448,-62.04953697331,0,-26.9901019735381,0.0808130579921684,"Kerguelen",1,"M"
"ct109-949-14.ct109-949-14.5947","ct109-949-14",2015-02-06 06:45:29,46.75,89.2784839180368,-62.1197403456608,0,-26.9098589661945,0.0802430073435445,"Kerguelen",1,"M"
"ct109-949-14.ct109-949-14.5948","ct109-949-14",2015-02-06 12:45:29,47,88.9701279071937,-62.1694483404298,0,-26.8302464817984,0.079612484396091,"Kerguelen",1,"M"
"ct109-949-14.ct109-949-14.5949","ct109-949-14",2015-02-06 18:45:29,47.25,88.677090736868,-62.2312952458444,0,-26.7513246164894,0.0789218653090507,"Kerguelen",1.00025,"M"
"ct109-949-14.ct109-949-14.5950","ct109-949-14",2015-02-07 00:45:29,47.5,88.4972299554412,-62.3022456802968,0,-26.673153407392,0.0781712090973774,"Kerguelen",1.00175,"M"
"ct109-949-14.ct109-949-14.5951","ct109-949-14",2015-02-07 06:45:29,47.75,88.2623054755164,-62.3208098483706,0,-26.5957931257856,0.0773602816064201,"Kerguelen",1.00075,"M"
"ct109-949-14.ct109-949-14.5952","ct109-949-14",2015-02-07 12:45:29,48,87.9321775800184,-62.2651292897373,0,-26.5193042825266,0.0764888432589816,"Kerguelen",1,"M"
"ct109-949-14.ct109-949-14.5953","ct109-949-14",2015-02-07 18:45:29,48.25,87.5954408434832,-62.2501210208941,0,-26.4437476307512,0.0755566517754158,"Kerguelen",1,"M"
"ct109-949-14.ct109-949-14.5954","ct109-949-14",2015-02-08 00:45:29,48.5,87.2159694105713,-62.2705114907602,0,-26.3691841676651,0.0745634630860803,"Kerguelen",1,"M"
"ct109-949-14.ct109-949-14.5955","ct109-949-14",2015-02-08 06:45:29,48.75,86.7488528020241,-62.3415903451362,0,-26.2956751353728,0.073509032292346,"Kerguelen",1,"M"
"ct109-949-14.ct109-949-14.5956","ct109-949-14",2015-02-08 12:45:29,49,86.2398747799636,-62.4416722425925,0,-26.2232820206862,0.0723931146865475,"Kerguelen",1,"M"
"ct109-949-14.ct109-949-14.5957","ct109-949-14",2015-02-08 18:45:29,49.25,85.9885111169022,-62.5478588042506,0,-26.1520665538763,0.0712154668099541,"Kerguelen",1.0025,"M"
"ct109-949-14.ct109-949-14.5958","ct109-949-14",2015-02-09 00:45:29,49.5,85.9693193015842,-62.7175108568821,0,-26.0820907063089,0.0699758475673828,"Kerguelen",1,"M"
"ct109-949-14.ct109-949-14.5959","ct109-949-14",2015-02-09 06:45:29,49.75,86.1343802397673,-62.863962504997,0,-26.0134166869302,0.0686740193786728,"Kerguelen",1,"M"
"ct109-949-14.ct109-949-14.5960","ct109-949-14",2015-02-09 12:45:29,50,86.4501206075087,-63.0042050824024,0,-25.9461069375458,0.0673097493843811,"Kerguelen",1,"M"
"ct109-949-14.ct109-949-14.5961","ct109-949-14",2015-02-09 18:45:29,50.25,86.7036218945993,-63.1233157337767,0,-25.8802241268687,0.0658828106770981,"Kerguelen",1.0335,"M"
"ct109-949-14.ct109-949-14.5962","ct109-949-14",2015-02-10 00:45:29,50.5,86.8315222195737,-63.1677329716591,0,-25.8158311432904,0.0643929835782875,"Kerguelen",1.07575,"M"
"ct109-949-14.ct109-949-14.5963","ct109-949-14",2015-02-10 06:45:29,50.75,86.9829133367406,-63.16915800563,0,-25.7529910863439,0.0628400569464949,"Kerguelen",1.12975,"M"
"ct109-949-14.ct109-949-14.5964","ct109-949-14",2015-02-10 12:45:29,51,87.1227679781467,-63.1764266591488,0,-25.6917672494422,0.0612238369017526,"Kerguelen",1.249,"M"
"ct109-949-14.ct109-949-14.5965","ct109-949-14",2015-02-10 18:45:29,51.25,87.1680361684489,-63.1521567724658,0,-25.6322128577558,0.0595543916864005,"Kerguelen",1.32325,"M"
"ct109-949-14.ct109-949-14.5966","ct109-949-14",2015-02-11 00:45:29,51.5,87.1532431893748,-63.1842560871319,0,-25.5743337614393,0.0578790963164766,"Kerguelen",1.354,"M"
"ct109-949-14.ct109-949-14.5967","ct109-949-14",2015-02-11 06:45:29,51.75,87.1414084461073,-63.2965464782942,0,-25.518122380514,0.0562113809253251,"Kerguelen",1.39425,"M"
"ct109-949-14.ct109-949-14.5968","ct109-949-14",2015-02-11 12:45:29,52,87.1605637777523,-63.3025560230326,0,-25.4635721993909,0.0545501811230698,"Kerguelen",1.375,"M"
"ct109-949-14.ct109-949-14.5969","ct109-949-14",2015-02-11 18:45:29,52.25,87.2077733479424,-63.2618099062538,0,-25.410676891825,0.05289530756587,"Kerguelen",1.34925,"M"
"ct109-949-14.ct109-949-14.5970","ct109-949-14",2015-02-12 00:45:29,52.5,87.1943556831729,-63.2176984442037,0,-25.3594345792778,0.0512423125472783,"Kerguelen",1.2955,"M"
"ct109-949-14.ct109-949-14.5971","ct109-949-14",2015-02-12 06:45:29,52.75,87.57261981603,-63.3511286934009,0,-25.3098435665534,0.0495910127244037,"Kerguelen",1.09,"M"
"ct109-949-14.ct109-949-14.5972","ct109-949-14",2015-02-12 12:45:29,53,87.6863307327438,-63.4881965740718,0,-25.2619009190274,0.0479426475259448,"Kerguelen",1.0025,"M"
"ct109-949-14.ct109-949-14.5973","ct109-949-14",2015-02-12 18:45:29,53.25,87.6393326439524,-63.6497818416744,0,-25.2156036419264,0.0462972771009929,"Kerguelen",1.002,"M"
"ct109-949-14.ct109-949-14.5974","ct109-949-14",2015-02-13 00:45:29,53.5,87.7170861940623,-63.7449982504712,0,-25.170949660884,0.0446539810423918,"Kerguelen",1,"M"
"ct109-949-14.ct109-949-14.5975","ct109-949-14",2015-02-13 06:45:29,53.75,88.0068673436685,-63.8411799788934,0,-25.1279430825329,0.0430065783511624,"Kerguelen",1,"M"
"ct109-949-14.ct109-949-14.5976","ct109-949-14",2015-02-13 12:45:29,54,88.3671424005641,-64.0119125817458,0,-25.086590398843,0.0413526836899103,"Kerguelen",1.00275,"M"
"ct109-949-14.ct109-949-14.5977","ct109-949-14",2015-02-13 18:45:29,54.25,88.4038751525898,-64.1737190415707,0,-25.0468980512576,0.039692347585385,"Kerguelen",1.00025,"M"
"ct109-949-14.ct109-949-14.5978","ct109-949-14",2015-02-14 00:45:29,54.5,88.3672110954472,-64.2991369210537,0,-25.0088724194359,0.0380256318216476,"Kerguelen",1,"M"
"ct109-949-14.ct109-949-14.5979","ct109-949-14",2015-02-14 06:45:29,54.75,88.3825266128592,-64.5083409550193,0,-24.9725198156962,0.0363526037397338,"Kerguelen",1,"M"
"ct109-949-14.ct109-949-14.5980","ct109-949-14",2015-02-14 12:45:29,55,88.4194711720227,-64.7431009175826,0,-24.9378455010472,0.0346743146490053,"Kerguelen",1,"M"
"ct109-949-14.ct109-949-14.5981","ct109-949-14",2015-02-14 18:45:29,55.25,88.4769045293579,-64.9380309902255,0,-24.904848080474,0.0329974205731776,"Kerguelen",1,"M"
"ct109-949-14.ct109-949-14.5982","ct109-949-14",2015-02-15 00:45:29,55.5,88.6492256946722,-65.0885607183094,0,-24.8735174649645,0.0313306155094922,"Kerguelen",1,"M"
"ct109-949-14.ct109-949-14.5983","ct109-949-14",2015-02-15 06:45:29,55.75,89.1135220694259,-65.2311156687034,0,-24.843818286677,0.0296991782874984,"Kerguelen",1,"M"
"ct109-949-14.ct109-949-14.5984","ct109-949-14",2015-02-15 12:45:29,56,89.6598637120343,-65.3224371500349,0,-24.8157083022884,0.0281099843886023,"Kerguelen",1,"M"
"ct109-949-14.ct109-949-14.5985","ct109-949-14",2015-02-15 18:45:29,56.25,90.1233913029767,-65.4245638776882,0,-24.7891451030775,0.0265631992109161,"Kerguelen",1,"M"
"ct109-949-14.ct109-949-14.5986","ct109-949-14",2015-02-16 00:45:29,56.5,90.5660854880939,-65.5388287336463,1,-24.7640861211102,0.0250589819673408,"Kerguelen",1.357,"M"
"ct109-949-14.ct109-949-14.5987","ct109-949-14",2015-02-16 06:45:29,56.75,90.656595029459,-65.5839029576329,1,-24.7404886355591,0.0235974855510745,"Kerguelen",1.13775,"M"
"ct109-949-14.ct109-949-14.5988","ct109-949-14",2015-02-16 12:45:29,57,90.6413424622099,-65.6706039449945,1,-24.718309779198,0.0221788563611075,"Kerguelen",1.01,"M"
"ct109-949-14.ct109-949-14.5989","ct109-949-14",2015-02-16 18:45:29,57.25,90.9720583229013,-65.841119481303,1,-24.6975060219764,0.0208037572215741,"Kerguelen",1.005,"M"
"ct109-949-14.ct109-949-14.5990","ct109-949-14",2015-02-17 00:45:29,57.5,91.1771502556905,-65.9460788792431,1,-24.6780248886277,0.0194811333487477,"Kerguelen",1.00325,"M"
"ct109-949-14.ct109-949-14.5991","ct109-949-14",2015-02-17 06:45:29,57.75,91.4952827078675,-65.9842039898184,1,-24.6598064413591,0.0182184472685337,"Kerguelen",1.01625,"M"
"ct109-949-14.ct109-949-14.5992","ct109-949-14",2015-02-17 12:45:29,58,91.6459412154755,-65.9512478919097,1,-24.642790383955,0.0170160574041123,"Kerguelen",1.0195,"M"
"ct109-949-14.ct109-949-14.5993","ct109-949-14",2015-02-17 18:45:29,58.25,91.7178070579537,-65.8859080557842,1,-24.6269162937698,0.0158740901851612,"Kerguelen",1.0245,"M"
"ct109-949-14.ct109-949-14.5994","ct109-949-14",2015-02-18 00:45:29,58.5,91.7592710577414,-65.8317562255459,1,-24.6121236311398,0.0147926626300504,"Kerguelen",1.0475,"M"
"ct109-949-14.ct109-949-14.5995","ct109-949-14",2015-02-18 06:45:29,58.75,91.6758107165954,-65.8289496496025,1,-24.5983517485065,0.0137718826333316,"Kerguelen",1.042,"M"
"ct109-949-14.ct109-949-14.5996","ct109-949-14",2015-02-18 12:45:29,59,91.5192340925929,-65.8623253909162,1,-24.5855398992052,0.0128118493012808,"Kerguelen",1.0455,"M"
"ct109-949-14.ct109-949-14.5997","ct109-949-14",2015-02-18 18:45:29,59.25,91.3613400621891,-65.8740345772244,1,-24.5736272458982,0.0119126533069419,"Kerguelen",1.047,"M"
"ct109-949-14.ct109-949-14.5998","ct109-949-14",2015-02-19 00:45:29,59.5,91.2229952571747,-65.8015598464587,1,-24.5625528686102,0.0110743772880506,"Kerguelen",1.05425,"M"
"ct109-949-14.ct109-949-14.5999","ct109-949-14",2015-02-19 06:45:29,59.75,90.8531178385151,-65.7364206410679,1,-24.552255772348,0.010297096262149,"Kerguelen",1.645,"M"
"ct109-949-14.ct109-949-14.6000","ct109-949-14",2015-02-19 12:45:29,60,90.9306128214303,-65.8888597677786,1,-24.542674894267,0.00958087808102248,"Kerguelen",1.0165,"M"
"ct109-958-14.ct109-958-14.6351","ct109-958-14",2015-01-05 19:05:32,0.25,73.581308808943,-61.8105673334255,0,-35.2758040390186,0.0278269706374346,"Kerguelen",1.0005,"M"
"ct109-958-14.ct109-958-14.6352","ct109-958-14",2015-01-06 01:05:32,0.5,73.5860400618543,-61.9126484385483,0,-35.2479958823724,0.0278081566461919,"Kerguelen",1,"M"
"ct109-958-14.ct109-958-14.6353","ct109-958-14",2015-01-06 07:05:32,0.75,73.7185374548214,-62.0833739759173,0,-35.2202170310638,0.027778851308613,"Kerguelen",1,"M"
"ct109-958-14.ct109-958-14.6354","ct109-958-14",2015-01-06 13:05:32,1,73.8418270516516,-62.261287932406,0,-35.192477966418,0.0277390646458209,"Kerguelen",1,"M"
"ct109-958-14.ct109-958-14.6355","ct109-958-14",2015-01-06 19:05:32,1.25,73.9695264695373,-62.4475924803696,0,-35.1647905055838,0.0276874608341471,"Kerguelen",1.00025,"M"
"ct109-958-14.ct109-958-14.6356","ct109-958-14",2015-01-07 01:05:32,1.5,74.0392136660721,-62.5420077535952,0,-35.1371779276334,0.0276125779504088,"Kerguelen",1,"M"
"ct109-958-14.ct109-958-14.6357","ct109-958-14",2015-01-07 07:05:32,1.75,74.2413529339108,-62.6655847469405,0,-35.1096715146477,0.027506412985695,"Kerguelen",1.0005,"M"
"ct109-958-14.ct109-958-14.6358","ct109-958-14",2015-01-07 13:05:32,2,74.4833165573613,-62.8260710171981,0,-35.0823027979708,0.0273687166769343,"Kerguelen",1.792,"M"
"ct109-958-14.ct109-958-14.6359","ct109-958-14",2015-01-07 19:05:32,2.25,74.5579491285953,-62.833842870212,0,-35.0551033147609,0.0271994832098721,"Kerguelen",1.79675,"M"
"ct109-958-14.ct109-958-14.6360","ct109-958-14",2015-01-08 01:05:32,2.5,74.5180869495488,-62.8432886988001,0,-35.0281051810132,0.0269981337477632,"Kerguelen",1.794,"M"
"ct109-958-14.ct109-958-14.6361","ct109-958-14",2015-01-08 07:05:32,2.75,74.5433562606968,-62.8285783225212,0,-35.0013363637897,0.0267688172234326,"Kerguelen",1.78775,"M"
"ct109-958-14.ct109-958-14.6362","ct109-958-14",2015-01-08 13:05:32,3,74.5258115776176,-62.8013791424675,0,-34.974822628611,0.0265137351787514,"Kerguelen",1.778,"M"
"ct109-958-14.ct109-958-14.6363","ct109-958-14",2015-01-08 19:05:32,3.25,74.4209720448643,-62.7990050771509,0,-34.9485823384955,0.0262402901155256,"Kerguelen",1.7675,"M"
"ct109-958-14.ct109-958-14.6364","ct109-958-14",2015-01-09 01:05:32,3.5,74.2535922311523,-62.8040749472799,0,-34.9226124225124,0.0259699159831095,"Kerguelen",1.77975,"M"
"ct109-958-14.ct109-958-14.6365","ct109-958-14",2015-01-09 07:05:32,3.75,73.998752111306,-62.7677620104472,0,-34.8969059516327,0.0257064708796995,"Kerguelen",2,"M"
"ct109-958-14.ct109-958-14.6366","ct109-958-14",2015-01-09 13:05:32,4,74.2702407494587,-62.7640465323607,0,-34.8714560062969,0.0254499453357204,"Kerguelen",1.99875,"M"
"ct109-958-14.ct109-958-14.6367","ct109-958-14",2015-01-09 19:05:32,4.25,74.3409811114052,-62.7750873326679,0,-34.8462556310693,0.0252003752275798,"Kerguelen",1.998,"M"
"ct109-958-14.ct109-958-14.6368","ct109-958-14",2015-01-10 01:05:32,4.5,74.3208986775092,-62.7863674718857,0,-34.8212976693154,0.0249579617539686,"Kerguelen",1.997,"M"
"ct109-958-14.ct109-958-14.6369","ct109-958-14",2015-01-10 07:05:32,4.75,74.3767090089218,-62.7898354753485,0,-34.7965773452891,0.024720324026295,"Kerguelen",1.99675,"M"
"ct109-958-14.ct109-958-14.6370","ct109-958-14",2015-01-10 13:05:32,5,74.319956179488,-62.7992726210738,0,-34.7720906880799,0.0244866572091829,"Kerguelen",1.99575,"M"
"ct109-958-14.ct109-958-14.6371","ct109-958-14",2015-01-10 19:05:32,5.25,74.4947899728882,-62.7923205120898,0,-34.7478337721325,0.0242569159473849,"Kerguelen",1.99225,"M"
"ct109-958-14.ct109-958-14.6372","ct109-958-14",2015-01-11 01:05:32,5.5,74.5944049935932,-62.8371951018035,0,-34.7238029937531,0.0240307783793969,"Kerguelen",1.98875,"M"
"ct109-958-14.ct109-958-14.6373","ct109-958-14",2015-01-11 07:05:32,5.75,74.5549335197816,-62.8497999780355,0,-34.699994906663,0.0238080870900936,"Kerguelen",1.986,"M"
"ct109-958-14.ct109-958-14.6374","ct109-958-14",2015-01-11 13:05:32,6,74.7068487869808,-62.9061335719853,0,-34.6764060706838,0.0235888359792047,"Kerguelen",1.9865,"M"
"ct109-958-14.ct109-958-14.6375","ct109-958-14",2015-01-11 19:05:32,6.25,74.7289933720617,-62.9990839978297,0,-34.6530330506338,0.0233730200499771,"Kerguelen",1.9915,"M"
"ct109-958-14.ct109-958-14.6376","ct109-958-14",2015-01-12 01:05:32,6.5,74.7708774572256,-63.0042805640372,0,-34.6298722206178,0.0231608300160446,"Kerguelen",1.9905,"M"
"ct109-958-14.ct109-958-14.6377","ct109-958-14",2015-01-12 07:05:32,6.75,74.6816635539418,-63.0860388522326,0,-34.6069178085905,0.0229544120273317,"Kerguelen",1.993,"M"
"ct109-958-14.ct109-958-14.6378","ct109-958-14",2015-01-12 13:05:32,7,74.5787928253337,-63.1138036544231,0,-34.5841627171366,0.022755091453841,"Kerguelen",1.999,"M"
"ct109-958-14.ct109-958-14.6379","ct109-958-14",2015-01-12 19:05:32,7.25,74.786652347338,-63.1508892478202,0,-34.561599835984,0.0225628811526546,"Kerguelen",1.999,"M"
"ct109-958-14.ct109-958-14.6380","ct109-958-14",2015-01-13 01:05:32,7.5,74.7319648885221,-63.1559819595543,0,-34.5392220616192,0.0223777743648179,"Kerguelen",1.9885,"M"
"ct109-958-14.ct109-958-14.6381","ct109-958-14",2015-01-13 07:05:32,7.75,74.6901682889576,-63.1923528423357,0,-34.5170222970903,0.0221997645289018,"Kerguelen",1.98075,"M"
"ct109-958-14.ct109-958-14.6382","ct109-958-14",2015-01-13 13:05:32,8,74.6687901367171,-63.2061759794014,0,-34.4949934518225,0.0220288452677242,"Kerguelen",1.97275,"M"
"ct109-958-14.ct109-958-14.6383","ct109-958-14",2015-01-13 19:05:32,8.25,74.5698454339259,-63.186408631017,0,-34.4731284414356,0.0218650103869622,"Kerguelen",1.96925,"M"
"ct109-958-14.ct109-958-14.6384","ct109-958-14",2015-01-14 01:05:32,8.5,74.5296901871256,-63.1851218902164,0,-34.451420187568,0.0217082538676139,"Kerguelen",1.96325,"M"
"ct109-958-14.ct109-958-14.6385","ct109-958-14",2015-01-14 07:05:32,8.75,74.4281865493531,-63.2097600385367,0,-34.4298616177141,0.0215585698539023,"Kerguelen",1.96675,"M"
"ct109-958-14.ct109-958-14.6386","ct109-958-14",2015-01-14 13:05:32,9,74.4431841828194,-63.2339026793871,0,-34.4084456650618,0.0214159526522262,"Kerguelen",1.96325,"M"
"ct109-958-14.ct109-958-14.6387","ct109-958-14",2015-01-14 19:05:32,9.25,74.3800877668135,-63.2418581241538,0,-34.3871652665255,0.0212803985363441,"Kerguelen",1.95975,"M"
"ct109-958-14.ct109-958-14.6388","ct109-958-14",2015-01-15 01:05:32,9.5,74.3413519879694,-63.2419999857718,0,-34.3660114133304,0.0211538531950384,"Kerguelen",1.95775,"M"
"ct109-958-14.ct109-958-14.6389","ct109-958-14",2015-01-15 07:05:32,9.75,74.3030341530023,-63.2235983587645,0,-34.3449694398937,0.0210419734367417,"Kerguelen",1.95625,"M"
"ct109-958-14.ct109-958-14.6390","ct109-958-14",2015-01-15 13:05:32,10,74.3743799327307,-63.2927887465148,0,-34.3240236684732,0.0209457714204941,"Kerguelen",1.94725,"M"
"ct109-958-14.ct109-958-14.6391","ct109-958-14",2015-01-15 19:05:32,10.25,74.4887538391151,-63.3075511504428,0,-34.3031584312322,0.0208652372410079,"Kerguelen",1.94175,"M"
"ct109-958-14.ct109-958-14.6392","ct109-958-14",2015-01-16 01:05:32,10.5,74.5010408201135,-63.3786831656563,0,-34.2823580699969,0.0208003612353291,"Kerguelen",1.94025,"M"
"ct109-958-14.ct109-958-14.6393","ct109-958-14",2015-01-16 07:05:32,10.75,74.8305020592087,-63.4126712027843,0,-34.2616069360394,0.0207511339575139,"Kerguelen",1.95175,"M"
"ct109-958-14.ct109-958-14.6394","ct109-958-14",2015-01-16 13:05:32,11,74.9647829456287,-63.3667785936923,0,-34.2408893898752,0.0207175461641063,"Kerguelen",1.954,"M"
"ct109-958-14.ct109-958-14.6395","ct109-958-14",2015-01-16 19:05:32,11.25,74.9391772730468,-63.3685132838203,0,-34.2201893006939,0.0207000891813358,"Kerguelen",1.93125,"M"
"ct109-958-14.ct109-958-14.6396","ct109-958-14",2015-01-17 01:05:32,11.5,74.8750203170316,-63.3660650319866,0,-34.1994853918208,0.0207039088731154,"Kerguelen",1.916,"M"
"ct109-958-14.ct109-958-14.6397","ct109-958-14",2015-01-17 07:05:32,11.75,74.8480855225722,-63.3669121987257,0,-34.1787533622532,0.0207320295676328,"Kerguelen",1.89475,"M"
"ct109-958-14.ct109-958-14.6398","ct109-958-14",2015-01-17 13:05:32,12,75.0139234194449,-63.344017154538,0,-34.1579688853363,0.020784476916863,"Kerguelen",1.86,"M"
"ct109-958-14.ct109-958-14.6399","ct109-958-14",2015-01-17 19:05:32,12.25,75.0712858110665,-63.3236742820469,0,-34.1371079944616,0.0208608908747021,"Kerguelen",1.81525,"M"
"ct109-958-14.ct109-958-14.6400","ct109-958-14",2015-01-18 01:05:32,12.5,75.0910737921291,-63.3036516239271,0,-34.1161509961254,0.0209569983362357,"Kerguelen",1.77725,"M"
"ct109-958-14.ct109-958-14.6401","ct109-958-14",2015-01-18 07:05:32,12.75,75.1896328453362,-63.3234732305264,0,-34.0950760941026,0.0210749020227996,"Kerguelen",1.72725,"M"
"ct109-958-14.ct109-958-14.6402","ct109-958-14",2015-01-18 13:05:32,13,75.2588039307507,-63.2915829997938,0,-34.0738600422107,0.0212160518918758,"Kerguelen",1.667,"M"
"ct109-958-14.ct109-958-14.6403","ct109-958-14",2015-01-18 19:05:32,13.25,75.190090996966,-63.2323672221645,0,-34.0524796067211,0.0213804354895486,"Kerguelen",1.587,"M"
"ct109-958-14.ct109-958-14.6404","ct109-958-14",2015-01-19 01:05:32,13.5,75.1390408438283,-63.2825825205425,0,-34.0309115663654,0.0215680403556961,"Kerguelen",1.00625,"M"
"ct109-958-14.ct109-958-14.6405","ct109-958-14",2015-01-19 07:05:32,13.75,74.7980598212887,-63.4627041227949,0,-34.0091327123605,0.0217788540049946,"Kerguelen",1,"M"
"ct109-958-14.ct109-958-14.6406","ct109-958-14",2015-01-19 13:05:32,14,74.5246508078521,-63.6519107248585,0,-33.9871198484564,0.0220128639040751,"Kerguelen",1.00025,"M"
"ct109-958-14.ct109-958-14.6407","ct109-958-14",2015-01-19 19:05:32,14.25,74.4991941322188,-63.7889072399522,0,-33.9648497993475,0.0222700491088523,"Kerguelen",1.00025,"M"
"ct109-958-14.ct109-958-14.6408","ct109-958-14",2015-01-20 01:05:32,14.5,74.4461165926196,-63.8638830714083,0,-33.9423011569414,0.0225486424060839,"Kerguelen",1,"M"
"ct109-958-14.ct109-958-14.6409","ct109-958-14",2015-01-20 07:05:32,14.75,74.3587675456672,-64.0173720632242,0,-33.9194564328754,0.0228447240659957,"Kerguelen",1,"M"
"ct109-958-14.ct109-958-14.6410","ct109-958-14",2015-01-20 13:05:32,15,74.1809641850976,-64.163196116972,0,-33.8962986762239,0.0231577566515928,"Kerguelen",1,"M"
"ct109-958-14.ct109-958-14.6411","ct109-958-14",2015-01-20 19:05:32,15.25,74.0866970913455,-64.3148520471338,0,-33.8728109455213,0.0234877307025927,"Kerguelen",1.0005,"M"
"ct109-958-14.ct109-958-14.6412","ct109-958-14",2015-01-21 01:05:32,15.5,73.9379753871884,-64.3868217253321,0,-33.8489763088366,0.0238346366846554,"Kerguelen",1,"M"
"ct109-958-14.ct109-958-14.6413","ct109-958-14",2015-01-21 07:05:32,15.75,73.6492399446616,-64.5005078421612,0,-33.8247778438521,0.0241984649844984,"Kerguelen",1,"M"
"ct109-958-14.ct109-958-14.6414","ct109-958-14",2015-01-21 13:05:32,16,73.1842086528399,-64.6305740290394,0,-33.8001986379359,0.0245792059161865,"Kerguelen",1,"M"
"ct109-958-14.ct109-958-14.6415","ct109-958-14",2015-01-21 19:05:32,16.25,72.7597270506154,-64.7913904477059,0,-33.7752217882126,0.0249768497232961,"Kerguelen",1,"M"
"ct109-958-14.ct109-958-14.6416","ct109-958-14",2015-01-22 01:05:32,16.5,72.4464326095898,-64.9991135822638,0,-33.7498304016344,0.0253913865782496,"Kerguelen",1,"M"
"ct109-958-14.ct109-958-14.6417","ct109-958-14",2015-01-22 07:05:32,16.75,72.3077442823884,-65.2892662014109,0,-33.7240075950413,0.0258228065930344,"Kerguelen",1,"M"
"ct109-958-14.ct109-958-14.6418","ct109-958-14",2015-01-22 13:05:32,17,72.098569789294,-65.4848879903276,0,-33.6977364952147,0.0262710998265969,"Kerguelen",1,"M"
"ct109-958-14.ct109-958-14.6419","ct109-958-14",2015-01-22 19:05:32,17.25,71.7879236014857,-65.6690661000249,0,-33.6710002389265,0.0267362562882623,"Kerguelen",1,"M"
"ct109-958-14.ct109-958-14.6420","ct109-958-14",2015-01-23 01:05:32,17.5,71.4109272094361,-65.853403594835,0,-33.6437819729693,0.0272182659571574,"Kerguelen",1,"M"
"ct109-958-14.ct109-958-14.6421","ct109-958-14",2015-01-23 07:05:32,17.75,71.0103805580206,-66.1194762194102,0,-33.6160648541827,0.0277171187866021,"Kerguelen",1,"M"
"ct109-958-14.ct109-958-14.6422","ct109-958-14",2015-01-23 13:05:32,18,70.5132798134551,-66.3222594352772,0,-33.5878320494582,0.028232804724504,"Kerguelen",1,"M"
"ct109-958-14.ct109-958-14.6423","ct109-958-14",2015-01-23 19:05:32,18.25,70.2218030792978,-66.4874553169393,0,-33.5590667357282,0.0287653137300059,"Kerguelen",1,"M"
"ct109-958-14.ct109-958-14.6424","ct109-958-14",2015-01-24 01:05:32,18.5,69.9361113639839,-66.6506822889816,0,-33.5297520999406,0.0293146357876251,"Kerguelen",1.83775,"M"
"ct109-958-14.ct109-958-14.6425","ct109-958-14",2015-01-24 07:05:32,18.75,69.8480092007893,-66.7073995503347,1,-33.4998713390072,0.0298807609333873,"Kerguelen",1.9085,"M"
"ct109-958-14.ct109-958-14.6426","ct109-958-14",2015-01-24 13:05:32,19,69.8834820658206,-66.6792359312016,0,-33.4694076597291,0.0304636792781421,"Kerguelen",1.91175,"M"
"ct109-958-14.ct109-958-14.6427","ct109-958-14",2015-01-24 19:05:32,19.25,70.0260558849581,-66.597958022372,0,-33.4383442787004,0.0310633810286343,"Kerguelen",1.9365,"M"
"ct109-958-14.ct109-958-14.6428","ct109-958-14",2015-01-25 01:05:32,19.5,69.6022688439823,-66.6044826185407,0,-33.4066644221797,0.0316798565207277,"Kerguelen",1.26125,"M"
"ct109-958-14.ct109-958-14.6429","ct109-958-14",2015-01-25 07:05:32,19.75,69.4004035430231,-66.7111269927688,1,-33.3743513259289,0.0323130962508356,"Kerguelen",1.00125,"M"
"ct109-958-14.ct109-958-14.6430","ct109-958-14",2015-01-25 13:05:32,20,69.3387110764056,-66.8872033101084,1,-33.3413882350252,0.0329630909037038,"Kerguelen",1,"M"
"ct109-958-14.ct109-958-14.6431","ct109-958-14",2015-01-25 19:05:32,20.25,69.302928169059,-67.1318240762516,1,-33.3077584036302,0.0336298313949157,"Kerguelen",1.00025,"M"
"ct109-958-14.ct109-958-14.6432","ct109-958-14",2015-01-26 01:05:32,20.5,69.4161250525389,-67.3282904198934,1,-33.2734450947205,0.034313308909778,"Kerguelen",1.74675,"M"
"ct109-958-14.ct109-958-14.6433","ct109-958-14",2015-01-26 07:05:32,20.75,69.5206121221796,-67.3839631895732,1,-33.2384315797792,0.0350135149412456,"Kerguelen",1.90225,"M"
"ct109-958-14.ct109-958-14.6434","ct109-958-14",2015-01-26 13:05:32,21,69.3948388466625,-67.3677660864137,1,-33.2027011384393,0.0357304413398707,"Kerguelen",1.9095,"M"
"ct109-958-14.ct109-958-14.6435","ct109-958-14",2015-01-26 19:05:32,21.25,69.424986361993,-67.3661712947639,1,-33.1662370580756,0.036464080363785,"Kerguelen",1.90975,"M"
"ct109-958-14.ct109-958-14.6436","ct109-958-14",2015-01-27 01:05:32,21.5,69.2528663818931,-67.4351748622459,1,-33.129022633351,0.0372144247245632,"Kerguelen",1.9045,"M"
"ct109-958-14.ct109-958-14.6437","ct109-958-14",2015-01-27 07:05:32,21.75,69.0407580844551,-67.4419003956342,1,-33.0910411656986,0.037981467652437,"Kerguelen",1.92425,"M"
"ct109-958-14.ct109-958-14.6438","ct109-958-14",2015-01-27 13:05:32,22,69.0228645421575,-67.4588954457152,1,-33.052275962752,0.0387652029465668,"Kerguelen",1.92525,"M"
"ct109-958-14.ct109-958-14.6439","ct109-958-14",2015-01-27 19:05:32,22.25,68.8797151908287,-67.5241334983835,1,-33.0127103377068,0.0395656250452348,"Kerguelen",1.93825,"M"
"ct109-958-14.ct109-958-14.6440","ct109-958-14",2015-01-28 01:05:32,22.5,68.8660061917609,-67.5327096401381,1,-32.9723276086143,0.0403827290924086,"Kerguelen",1.94125,"M"
"ct109-958-14.ct109-958-14.6441","ct109-958-14",2015-01-28 07:05:32,22.75,68.6412534294184,-67.6675107669679,1,-32.9311110976096,0.0412165110047991,"Kerguelen",1.968,"M"
"ct109-958-14.ct109-958-14.6442","ct109-958-14",2015-01-28 13:05:32,23,68.8333426398604,-67.7977908651502,1,-32.8890465429651,0.0420645546444665,"Kerguelen",2,"M"
"ct109-958-14.ct109-958-14.6443","ct109-958-14",2015-01-28 19:05:32,23.25,68.72684518175,-67.7285413090395,1,-32.8461296088288,0.0429169341363,"Kerguelen",1.9995,"M"
"ct109-958-14.ct109-958-14.6444","ct109-958-14",2015-01-29 01:05:32,23.5,68.7775842900624,-67.7384893469242,1,-32.8023574251868,0.0437721836419991,"Kerguelen",1.99375,"M"
"ct109-958-14.ct109-958-14.6445","ct109-958-14",2015-01-29 07:05:32,23.75,69.1690934169527,-67.8182095212368,1,-32.7577270141649,0.0446304110219009,"Kerguelen",2,"M"
"ct109-958-14.ct109-958-14.6446","ct109-958-14",2015-01-29 13:05:32,24,69.1381035075658,-67.7620561640326,1,-32.7122353876208,0.0454916265440641,"Kerguelen",1.99625,"M"
"ct109-958-14.ct109-958-14.6447","ct109-958-14",2015-01-29 19:05:32,24.25,69.2256509999656,-67.660307158496,1,-32.6658795460566,0.0463558415642329,"Kerguelen",1.99525,"M"
"ct109-958-14.ct109-958-14.6448","ct109-958-14",2015-01-30 01:05:32,24.5,69.1559942471025,-67.6214562550663,1,-32.6186564774874,0.0472230685692243,"Kerguelen",1.99625,"M"
"ct109-958-14.ct109-958-14.6449","ct109-958-14",2015-01-30 07:05:32,24.75,69.3906800773776,-67.6110502846902,1,-32.5705631562711,0.0480933212163026,"Kerguelen",1.9875,"M"
"ct109-958-14.ct109-958-14.6450","ct109-958-14",2015-01-30 13:05:32,25,69.6165618228992,-67.5784234789073,1,-32.5215965419029,0.0489666143681622,"Kerguelen",2,"M"
"ct109-958-14.ct109-958-14.6451","ct109-958-14",2015-01-30 19:05:32,25.25,69.295149807959,-67.5045579985288,1,-32.4717535777641,0.0498429641388021,"Kerguelen",1.99675,"M"
"ct109-958-14.ct109-958-14.6452","ct109-958-14",2015-01-31 01:05:32,25.5,69.1831776592594,-67.4039413175166,1,-32.421031189828,0.0507223879361085,"Kerguelen",1.99925,"M"
"ct109-958-14.ct109-958-14.6453","ct109-958-14",2015-01-31 07:05:32,25.75,69.1916263729893,-67.4308988733802,1,-32.3694262853289,0.0516049044991085,"Kerguelen",1.99575,"M"
"ct109-958-14.ct109-958-14.6454","ct109-958-14",2015-01-31 13:05:32,26,69.2265257988454,-67.4367668691253,1,-32.3169357513783,0.0524905339505333,"Kerguelen",1.9905,"M"
"ct109-958-14.ct109-958-14.6455","ct109-958-14",2015-01-31 19:05:32,26.25,69.1958745569599,-67.418259591974,1,-32.2635564535444,0.0533792978339886,"Kerguelen",1.98525,"M"
"ct109-958-14.ct109-958-14.6456","ct109-958-14",2015-02-01 01:05:32,26.5,69.2322983016846,-67.4316178200114,1,-32.2092852343788,0.0542712191655192,"Kerguelen",1.97975,"M"
"ct109-958-14.ct109-958-14.6457","ct109-958-14",2015-02-01 07:05:32,26.75,69.1853320283622,-67.4137574194385,1,-32.1541189118965,0.0551663224823196,"Kerguelen",1.96825,"M"
"ct109-958-14.ct109-958-14.6458","ct109-958-14",2015-02-01 13:05:32,27,69.1551117360328,-67.4220745147831,1,-32.098054278011,0.0560646338855331,"Kerguelen",1.9575,"M"
"ct109-958-14.ct109-958-14.6459","ct109-958-14",2015-02-01 19:05:32,27.25,68.8829507983429,-67.426074298373,1,-32.0410880969147,0.0569661810962463,"Kerguelen",1.9585,"M"
"ct109-958-14.ct109-958-14.6460","ct109-958-14",2015-02-02 01:05:32,27.5,68.6940225367061,-67.3766998442113,1,-31.9832171034077,0.0578709935070532,"Kerguelen",1.98825,"M"
"ct109-958-14.ct109-958-14.6461","ct109-958-14",2015-02-02 07:05:32,27.75,68.7451658621722,-67.3963419390224,1,-31.9244380011775,0.0587791022301665,"Kerguelen",1.99,"M"
"ct109-958-14.ct109-958-14.6462","ct109-958-14",2015-02-02 13:05:32,28,68.6208171671795,-67.3609023982248,1,-31.8647474610211,0.0596905401564096,"Kerguelen",1.98625,"M"
"ct109-958-14.ct109-958-14.6463","ct109-958-14",2015-02-02 19:05:32,28.25,68.4930524789869,-67.36874895843,1,-31.8041421190086,0.060605342012493,"Kerguelen",1.98825,"M"
"ct109-958-14.ct109-958-14.6464","ct109-958-14",2015-02-03 01:05:32,28.5,68.5407888082229,-67.3098154423142,1,-31.7426185745961,0.0615235444125506,"Kerguelen",1.98275,"M"
"ct109-958-14.ct109-958-14.6465","ct109-958-14",2015-02-03 07:05:32,28.75,68.4139222006936,-67.3099818545605,1,-31.6801733886727,0.062445185923371,"Kerguelen",1.96625,"M"
"ct109-958-14.ct109-958-14.6466","ct109-958-14",2015-02-03 13:05:32,29,68.4970839949173,-67.3184189604067,1,-31.6168034698413,0.0633699188313464,"Kerguelen",1.89175,"M"
"ct109-958-14.ct109-958-14.6467","ct109-958-14",2015-02-03 19:05:32,29.25,68.4948255663321,-67.2996664245407,1,-31.5525080063091,0.0642954635322102,"Kerguelen",1.7865,"M"
"ct109-958-14.ct109-958-14.6468","ct109-958-14",2015-02-04 01:05:32,29.5,68.5315739519022,-67.3572174782011,1,-31.487287000312,0.0652210059971403,"Kerguelen",1.5875,"M"
"ct109-958-14.ct109-958-14.6469","ct109-958-14",2015-02-04 07:05:32,29.75,68.4545622594557,-67.3755209423421,1,-31.4211404076297,0.0661465926823035,"Kerguelen",1.32425,"M"
"ct109-958-14.ct109-958-14.6470","ct109-958-14",2015-02-04 13:05:32,30,68.4619202631986,-67.4375916344429,1,-31.3540681342349,0.0670722733948192,"Kerguelen",1.06025,"M"
"ct109-958-14.ct109-958-14.6471","ct109-958-14",2015-02-04 19:05:32,30.25,68.22866568858,-67.5513714497,1,-31.286070034295,0.0679980999398921,"Kerguelen",1.00425,"M"
"ct109-958-14.ct109-958-14.6472","ct109-958-14",2015-02-05 01:05:32,30.5,68.0480407617196,-67.6286970962136,1,-31.2171459081368,0.0689241261581375,"Kerguelen",1,"M"
"ct109-958-14.ct109-958-14.6473","ct109-958-14",2015-02-05 07:05:32,30.75,67.7664085366752,-67.7628879808364,1,-31.1472955001632,0.0698504079736872,"Kerguelen",1.00025,"M"
"ct109-958-14.ct109-958-14.6474","ct109-958-14",2015-02-05 13:05:32,31,67.5011028192776,-67.8108290722399,1,-31.0765184967233,0.0707770034398814,"Kerguelen",1.00225,"M"
"ct109-958-14.ct109-958-14.6475","ct109-958-14",2015-02-05 19:05:32,31.25,67.2528429736017,-67.7768471670875,1,-31.0048145239432,0.0717039727800739,"Kerguelen",1.0035,"M"
"ct109-958-14.ct109-958-14.6476","ct109-958-14",2015-02-06 01:05:32,31.5,67.1536982659647,-67.7006248489382,1,-30.9321831455026,0.0726313784405741,"Kerguelen",1.0025,"M"
"ct109-958-14.ct109-958-14.6477","ct109-958-14",2015-02-06 07:05:32,31.75,67.2014702449435,-67.6257562721617,1,-30.858623860362,0.0735592851405953,"Kerguelen",1.00075,"M"
"ct109-958-14.ct109-958-14.6478","ct109-958-14",2015-02-06 13:05:32,32,67.3829789147979,-67.5689092618001,1,-30.7841361004435,0.0744877599185123,"Kerguelen",1.00025,"M"
"ct109-958-14.ct109-958-14.6479","ct109-958-14",2015-02-06 19:05:32,32.25,67.6538190996974,-67.5626546789459,1,-30.7087192282538,0.0754168721897153,"Kerguelen",1,"M"
"ct109-958-14.ct109-958-14.6480","ct109-958-14",2015-02-07 01:05:32,32.5,68.0115536450338,-67.6155168174887,1,-30.6323725344515,0.0763466938023316,"Kerguelen",1.00225,"M"
"ct109-958-14.ct109-958-14.6481","ct109-958-14",2015-02-07 07:05:32,32.75,68.2762793039514,-67.6322032183074,1,-30.5550958185069,0.0772767159445631,"Kerguelen",1.06625,"M"
"ct109-958-14.ct109-958-14.6482","ct109-958-14",2015-02-07 13:05:32,33,68.2827720105191,-67.6284785371138,1,-30.4768979049223,0.0781979135845712,"Kerguelen",1.04375,"M"
"ct109-958-14.ct109-958-14.6483","ct109-958-14",2015-02-07 19:05:32,33.25,68.354394018912,-67.6828051966714,1,-30.3977947466519,0.0791031582704271,"Kerguelen",1.00575,"M"
"ct109-958-14.ct109-958-14.6484","ct109-958-14",2015-02-08 01:05:32,33.5,68.5659846716555,-67.7602681429613,1,-30.3178024197354,0.079992326916517,"Kerguelen",1,"M"
"ct109-958-14.ct109-958-14.6485","ct109-958-14",2015-02-08 07:05:32,33.75,69.0300439487323,-67.764752408125,1,-30.2369369262596,0.0808654934758402,"Kerguelen",1.0025,"M"
"ct109-958-14.ct109-958-14.6486","ct109-958-14",2015-02-08 13:05:32,34,69.4146849643557,-67.6949272090442,1,-30.1552141945138,0.0817227317457203,"Kerguelen",1.5285,"M"
"ct109-958-14.ct109-958-14.6487","ct109-958-14",2015-02-08 19:05:32,34.25,69.5573949646121,-67.7053451904386,1,-30.0726513522133,0.0825628423005376,"Kerguelen",1.61075,"M"
"ct109-958-14.ct109-958-14.6488","ct109-958-14",2015-02-09 01:05:32,34.5,69.3103887639543,-67.6449017532748,1,-29.9892700559902,0.0833812962231062,"Kerguelen",1.4575,"M"
"ct109-958-14.ct109-958-14.6489","ct109-958-14",2015-02-09 07:05:32,34.75,68.9259285997812,-67.601327018585,1,-29.9050929334549,0.0841771225353172,"Kerguelen",1.99875,"M"
"ct109-958-14.ct109-958-14.6490","ct109-958-14",2015-02-09 13:05:32,35,68.9593304656782,-67.5903690315677,1,-29.8201425463967,0.0849503870581303,"Kerguelen",1.99875,"M"
"ct109-958-14.ct109-958-14.6491","ct109-958-14",2015-02-09 19:05:32,35.25,68.8376127542366,-67.6467505262012,1,-29.7344413927363,0.085701153660489,"Kerguelen",1.99925,"M"
"ct109-958-14.ct109-958-14.6492","ct109-958-14",2015-02-10 01:05:32,35.5,68.8398239565052,-67.654792192313,1,-29.6480119086483,0.0864294840879798,"Kerguelen",1.995,"M"
"ct109-958-14.ct109-958-14.6493","ct109-958-14",2015-02-10 07:05:32,35.75,68.8324359963229,-67.6782251470821,1,-29.560876470846,0.0871354378022937,"Kerguelen",1.9945,"M"
"ct109-958-14.ct109-958-14.6494","ct109-958-14",2015-02-10 13:05:32,36,68.8679826564717,-67.6734006097276,1,-29.4730573990261,0.0878190718199279,"Kerguelen",1.99375,"M"
"ct109-958-14.ct109-958-14.6495","ct109-958-14",2015-02-10 19:05:32,36.25,68.8561521490603,-67.6751035683242,1,-29.3845769584796,0.0884804405464457,"Kerguelen",1.9915,"M"
"ct109-958-14.ct109-958-14.6496","ct109-958-14",2015-02-11 01:05:32,36.5,68.8814423434335,-67.6931638554514,1,-29.2954573628547,0.0891195956248814,"Kerguelen",1.99225,"M"
"ct109-958-14.ct109-958-14.6497","ct109-958-14",2015-02-11 07:05:32,36.75,68.8537129121603,-67.7119988873768,1,-29.2057207770738,0.0897365857809418,"Kerguelen",1.99375,"M"
"ct109-958-14.ct109-958-14.6498","ct109-958-14",2015-02-11 13:05:32,37,68.8334716060687,-67.6868871805611,1,-29.1153877830657,0.0903329940080633,"Kerguelen",1.9925,"M"
"ct109-958-14.ct109-958-14.6499","ct109-958-14",2015-02-11 19:05:32,37.25,68.7368660557565,-67.6886810160744,1,-29.0244711562595,0.0909166268062034,"Kerguelen",1.9945,"M"
"ct109-958-14.ct109-958-14.6500","ct109-958-14",2015-02-12 01:05:32,37.5,68.7100652586126,-67.6385945893108,1,-28.9329811736118,0.0914899826477522,"Kerguelen",1.99525,"M"
"ct109-958-14.ct109-958-14.6501","ct109-958-14",2015-02-12 07:05:32,37.75,68.547431606292,-67.6034562072461,1,-28.8409280539184,0.0920531196933527,"Kerguelen",1.9975,"M"
"ct109-958-14.ct109-958-14.6502","ct109-958-14",2015-02-12 13:05:32,38,68.6166000626793,-67.6002840385775,1,-28.7483219596585,0.0926060942599505,"Kerguelen",1.9965,"M"
"ct109-958-14.ct109-958-14.6503","ct109-958-14",2015-02-12 19:05:32,38.25,68.5894718309518,-67.6238634197408,1,-28.6551729980004,0.0931489616580183,"Kerguelen",1.9955,"M"
"ct109-958-14.ct109-958-14.6504","ct109-958-14",2015-02-13 01:05:32,38.5,68.6012097243797,-67.6301076895453,1,-28.5614912218552,0.0936817761451991,"Kerguelen",1.99525,"M"
"ct109-958-14.ct109-958-14.6505","ct109-958-14",2015-02-13 07:05:32,38.75,68.4578202773358,-67.6256944670828,1,-28.4672866309835,0.094204590871716,"Kerguelen",1.99575,"M"
"ct109-958-14.ct109-958-14.6506","ct109-958-14",2015-02-13 13:05:32,39,68.533867311147,-67.6164896403801,1,-28.3725691731597,0.0947174578237842,"Kerguelen",1.9945,"M"
"ct109-958-14.ct109-958-14.6507","ct109-958-14",2015-02-13 19:05:32,39.25,68.5224573412319,-67.6511129513705,1,-28.2773487453847,0.0952204277750834,"Kerguelen",1.99325,"M"
"ct109-958-14.ct109-958-14.6508","ct109-958-14",2015-02-14 01:05:32,39.5,68.438130420857,-67.6582979281277,1,-28.1816351951488,0.0957135502358875,"Kerguelen",1.99575,"M"
"ct109-958-14.ct109-958-14.6509","ct109-958-14",2015-02-14 07:05:32,39.75,68.520544251255,-67.6450673046001,1,-28.0854383217536,0.096196873395199,"Kerguelen",1.9955,"M"
"ct109-958-14.ct109-958-14.6510","ct109-958-14",2015-02-14 13:05:32,40,68.5033677798284,-67.660512392947,1,-27.9887678776786,0.0966704440749311,"Kerguelen",1.99425,"M"
"ct109-958-14.ct109-958-14.6511","ct109-958-14",2015-02-14 19:05:32,40.25,68.5112392652423,-67.6590510444898,1,-27.8916335700005,0.0971343076781817,"Kerguelen",1.99325,"M"
"ct109-958-14.ct109-958-14.6512","ct109-958-14",2015-02-15 01:05:32,40.5,68.5341331531321,-67.6470236880894,1,-27.7940450618672,0.0975885081333117,"Kerguelen",1.9955,"M"
"ct109-958-14.ct109-958-14.6513","ct109-958-14",2015-02-15 07:05:32,40.75,68.7427884128162,-67.6679884389707,1,-27.6960119740188,0.0980330878483926,"Kerguelen",1.9995,"M"
"ct109-958-14.ct109-958-14.6514","ct109-958-14",2015-02-15 13:05:32,41,68.579459902706,-67.6540973018568,1,-27.5975438863588,0.0984680876599919,"Kerguelen",1.997,"M"
"ct109-958-14.ct109-958-14.6515","ct109-958-14",2015-02-15 19:05:32,41.25,68.4726509241118,-67.6189436868154,1,-27.4986503395809,0.0988935467779062,"Kerguelen",1.9965,"M"
"ct109-958-14.ct109-958-14.6516","ct109-958-14",2015-02-16 01:05:32,41.5,68.3818002784369,-67.6305494528127,1,-27.3993408368411,0.0993095027397362,"Kerguelen",1.9975,"M"
"ct109-958-14.ct109-958-14.6517","ct109-958-14",2015-02-16 07:05:32,41.75,68.3516349595418,-67.577479777518,1,-27.2996248454811,0.0997159913600387,"Kerguelen",1.99875,"M"
"ct109-958-14.ct109-958-14.6518","ct109-958-14",2015-02-16 13:05:32,42,68.472680768621,-67.5781485035093,1,-27.1995117988057,0.100113046675393,"Kerguelen",1.999,"M"
"ct109-958-14.ct109-958-14.6519","ct109-958-14",2015-02-16 19:05:32,42.25,68.4801910983156,-67.6481773008243,1,-27.0990110979045,0.100500700901235,"Kerguelen",1.99975,"M"
"ct109-958-14.ct109-958-14.6520","ct109-958-14",2015-02-17 01:05:32,42.5,68.5104686065915,-67.620556674906,1,-26.9981321135307,0.100878984373787,"Kerguelen",1.99875,"M"
"ct109-958-14.ct109-958-14.6521","ct109-958-14",2015-02-17 07:05:32,42.75,68.6565616844627,-67.5917992584956,1,-26.8968841880253,0.101247925505382,"Kerguelen",1.99925,"M"
"ct109-958-14.ct109-958-14.6522","ct109-958-14",2015-02-17 13:05:32,43,68.5889060624994,-67.5776194999202,1,-26.7952766372917,0.101607550733596,"Kerguelen",1.99825,"M"
"ct109-958-14.ct109-958-14.6523","ct109-958-14",2015-02-17 19:05:32,43.25,68.5418517890279,-67.5877889942777,1,-26.6933187528261,0.101957884465603,"Kerguelen",1.997,"M"
"ct109-958-14.ct109-958-14.6524","ct109-958-14",2015-02-18 01:05:32,43.5,68.5690614416936,-67.6038702427168,1,-26.5910198037937,0.10229894903237,"Kerguelen",1.9955,"M"
"ct109-958-14.ct109-958-14.6525","ct109-958-14",2015-02-18 07:05:32,43.75,68.6430996526781,-67.5614252523773,1,-26.4883890391552,0.102630764638478,"Kerguelen",1.994,"M"
"ct109-958-14.ct109-958-14.6526","ct109-958-14",2015-02-18 13:05:32,44,68.6195287781942,-67.5601085759805,1,-26.385435689851,0.102953349304286,"Kerguelen",1.9915,"M"
"ct109-958-14.ct109-958-14.6527","ct109-958-14",2015-02-18 19:05:32,44.25,68.6179226428577,-67.5965787901668,1,-26.2821689710297,0.10326671882121,"Kerguelen",1.99075,"M"
"ct109-958-14.ct109-958-14.6528","ct109-958-14",2015-02-19 01:05:32,44.5,68.4007568403276,-67.6565781036898,1,-26.1785980843309,0.103570886698801,"Kerguelen",1.99525,"M"
"ct109-958-14.ct109-958-14.6529","ct109-958-14",2015-02-19 07:05:32,44.75,68.4213772097486,-67.7026887401808,1,-26.0747322202226,0.103865864108327,"Kerguelen",1.99575,"M"
"ct109-958-14.ct109-958-14.6530","ct109-958-14",2015-02-19 13:05:32,45,68.4112525506069,-67.6810478658935,1,-25.9705809920545,0.104151228168081,"Kerguelen",1.99575,"M"
"ct109-958-14.ct109-958-14.6531","ct109-958-14",2015-02-19 19:05:32,45.25,68.4294575511991,-67.6902755626285,1,-25.8661558539631,0.104425138091468,"Kerguelen",1.996,"M"
"ct109-958-14.ct109-958-14.6532","ct109-958-14",2015-02-20 01:05:32,45.5,68.5089257530196,-67.7093945112228,1,-25.761468760866,0.10468709309705,"Kerguelen",1.9965,"M"
"ct109-958-14.ct109-958-14.6533","ct109-958-14",2015-02-20 07:05:32,45.75,68.451330216855,-67.7545104306085,1,-25.6565316815435,0.104937079322498,"Kerguelen",1.99575,"M"
"ct109-958-14.ct109-958-14.6534","ct109-958-14",2015-02-20 13:05:32,46,68.4803851882593,-67.7358616341989,1,-25.5513566021921,0.105175079351394,"Kerguelen",1.99325,"M"
"ct109-958-14.ct109-958-14.6535","ct109-958-14",2015-02-20 19:05:32,46.25,68.5776713289162,-67.7179402015422,1,-25.4459555300511,0.105401072141043,"Kerguelen",1.994,"M"
"ct109-958-14.ct109-958-14.6536","ct109-958-14",2015-02-21 01:05:32,46.5,68.6356874668437,-67.6564507983216,1,-25.3403404971009,0.105615032950229,"Kerguelen",1.99675,"M"
"ct109-958-14.ct109-958-14.6537","ct109-958-14",2015-02-21 07:05:32,46.75,68.3453576224031,-67.6334143326386,1,-25.2345235638413,0.105816933259517,"Kerguelen",1.99675,"M"
"ct109-958-14.ct109-958-14.6538","ct109-958-14",2015-02-21 13:05:32,47,68.2748133831962,-67.7193026893847,1,-25.1285168231373,0.106006740704023,"Kerguelen",1.99675,"M"
"ct109-958-14.ct109-958-14.6539","ct109-958-14",2015-02-21 19:05:32,47.25,68.3519581666502,-67.7320570707367,1,-25.0223324041376,0.106184418999683,"Kerguelen",1.985,"M"
"ct109-958-14.ct109-958-14.6540","ct109-958-14",2015-02-22 01:05:32,47.5,68.2813760092018,-67.7638630903718,1,-24.9159824762747,0.106349927862948,"Kerguelen",1.97325,"M"
"ct109-958-14.ct109-958-14.6541","ct109-958-14",2015-02-22 07:05:32,47.75,68.2664328705997,-67.7680822104042,1,-24.8094792533311,0.106503222943596,"Kerguelen",1.958,"M"
"ct109-958-14.ct109-958-14.6542","ct109-958-14",2015-02-22 13:05:32,48,68.395531932931,-67.7455895268912,1,-24.7028349975818,0.106644255749302,"Kerguelen",1.9385,"M"
"ct109-958-14.ct109-958-14.6543","ct109-958-14",2015-02-22 19:05:32,48.25,68.4909395241252,-67.7232662383054,1,-24.5960620240153,0.106772973566516,"Kerguelen",1.9285,"M"
"ct109-958-14.ct109-958-14.6544","ct109-958-14",2015-02-23 01:05:32,48.5,68.6336367535338,-67.6860201940576,1,-24.4891727046242,0.106889319391054,"Kerguelen",1.93275,"M"
"ct109-958-14.ct109-958-14.6545","ct109-958-14",2015-02-23 07:05:32,48.75,68.677102634008,-67.7271045606636,1,-24.382179470775,0.106993233849254,"Kerguelen",1.92875,"M"
"ct109-958-14.ct109-958-14.6546","ct109-958-14",2015-02-23 13:05:32,49,68.6644475192502,-67.7187181749598,1,-24.2750945451143,0.10708492566065,"Kerguelen",1.9135,"M"
"ct109-958-14.ct109-958-14.6547","ct109-958-14",2015-02-23 19:05:32,49.25,68.6953971930342,-67.7541916200491,1,-24.1679296659801,0.107164879134225,"Kerguelen",1.89575,"M"
"ct109-958-14.ct109-958-14.6548","ct109-958-14",2015-02-24 01:05:32,49.5,68.777451988972,-67.7628884960484,1,-24.0606965742609,0.107233091719156,"Kerguelen",1.8755,"M"
"ct109-958-14.ct109-958-14.6549","ct109-958-14",2015-02-24 07:05:32,49.75,69.0180566183685,-67.7815164852629,1,-23.9534070835554,0.107289490705528,"Kerguelen",1.88525,"M"
"ct109-958-14.ct109-958-14.6550","ct109-958-14",2015-02-24 13:05:32,50,69.1732579941868,-67.7867336222446,1,-23.8460730845714,0.107333998984047,"Kerguelen",1.90475,"M"
"ct109-958-14.ct109-958-14.6551","ct109-958-14",2015-02-24 19:05:32,50.25,69.1611474904366,-67.7053321164348,1,-23.738706341705,0.107366742866308,"Kerguelen",1.90675,"M"
"ct109-958-14.ct109-958-14.6552","ct109-958-14",2015-02-25 01:05:32,50.5,68.9594313807552,-67.756345692888,1,-23.6313164125682,0.107389929136897,"Kerguelen",1.87425,"M"
"ct109-958-14.ct109-958-14.6553","ct109-958-14",2015-02-25 07:05:32,50.75,68.7699031248385,-67.7768322002696,1,-23.5239115041764,0.107404908391709,"Kerguelen",1.8765,"M"
"ct109-958-14.ct109-958-14.6554","ct109-958-14",2015-02-25 13:05:32,51,68.7963705781058,-67.6946923882112,1,-23.416499865528,0.10741163864848,"Kerguelen",1.78175,"M"
"ct109-958-14.ct109-958-14.6555","ct109-958-14",2015-02-25 19:05:32,51.25,68.6863787257011,-67.5947863846799,1,-23.309089814837,0.107410050690981,"Kerguelen",1.7675,"M"
"ct109-958-14.ct109-958-14.6556","ct109-958-14",2015-02-26 01:05:32,51.5,68.5305071026364,-67.4903562608016,1,-23.2016898032896,0.107400011547423,"Kerguelen",1.933,"M"
"ct109-958-14.ct109-958-14.6557","ct109-958-14",2015-02-26 07:05:32,51.75,68.4086639364773,-67.5127566335362,1,-23.0943084145017,0.107381388787872,"Kerguelen",1.95225,"M"
"ct109-958-14.ct109-958-14.6558","ct109-958-14",2015-02-26 13:05:32,52,68.3989927960537,-67.5114096732608,1,-22.9869538709455,0.107354543556143,"Kerguelen",1.963,"M"
"ct109-958-14.ct109-958-14.6559","ct109-958-14",2015-02-26 19:05:32,52.25,68.4019026481211,-67.5444976638249,1,-22.8796334875269,0.107320383418633,"Kerguelen",1.97725,"M"
"ct109-958-14.ct109-958-14.6560","ct109-958-14",2015-02-27 01:05:32,52.5,68.3402718136338,-67.515558922992,1,-22.772354517704,0.107278969822891,"Kerguelen",1.9815,"M"
"ct109-958-14.ct109-958-14.6561","ct109-958-14",2015-02-27 07:05:32,52.75,68.3841078252076,-67.5176559910773,1,-22.6651242886288,0.107230229075209,"Kerguelen",1.983,"M"
"ct109-958-14.ct109-958-14.6562","ct109-958-14",2015-02-27 13:05:32,53,68.4292041994971,-67.4818593382353,1,-22.5579488252959,0.107175463332912,"Kerguelen",1.98275,"M"
"ct109-958-14.ct109-958-14.6563","ct109-958-14",2015-02-27 19:05:32,53.25,68.4011717258058,-67.4794858669093,1,-22.4508292249266,0.107119600369279,"Kerguelen",1.98025,"M"
"ct109-958-14.ct109-958-14.6564","ct109-958-14",2015-02-28 01:05:32,53.5,68.3854046220584,-67.4959670993561,1,-22.3437654769365,0.107063747990116,"Kerguelen",1.98125,"M"
"ct109-958-14.ct109-958-14.6565","ct109-958-14",2015-02-28 07:05:32,53.75,68.3281382141034,-67.5414146374195,1,-22.2367575834555,0.107007893481006,"Kerguelen",1.98275,"M"
"ct109-958-14.ct109-958-14.6566","ct109-958-14",2015-02-28 13:05:32,54,68.1919342137983,-67.5380363421829,1,-22.1298055596156,0.106952023839943,"Kerguelen",1.98925,"M"
"ct109-958-14.ct109-958-14.6567","ct109-958-14",2015-02-28 19:05:32,54.25,68.1894533261914,-67.5301323247382,1,-22.0229094338374,0.106896125778164,"Kerguelen",1.99025,"M"
"ct109-958-14.ct109-958-14.6568","ct109-958-14",2015-03-01 01:05:32,54.5,68.1967129334322,-67.565974601605,1,-21.9160689609448,0.106840472892636,"Kerguelen",1.99275,"M"
"ct109-958-14.ct109-958-14.6569","ct109-958-14",2015-03-01 07:05:32,54.75,68.1564834597786,-67.5997107067737,1,-21.8092828069779,0.106786153966826,"Kerguelen",1.99775,"M"
"ct109-958-14.ct109-958-14.6570","ct109-958-14",2015-03-01 13:05:32,55,68.3201500699227,-67.5378602435256,1,-21.7025493282532,0.106733478724705,"Kerguelen",1.999,"M"
"ct109-958-14.ct109-958-14.6571","ct109-958-14",2015-03-01 19:05:32,55.25,68.2412660111999,-67.5998399287509,1,-21.5958663980627,0.106682930190541,"Kerguelen",1.9985,"M"
"ct109-958-14.ct109-958-14.6572","ct109-958-14",2015-03-02 01:05:32,55.5,68.2296633285732,-67.5805863891258,1,-21.4892315975129,0.10663480054979,"Kerguelen",1.9945,"M"
"ct109-958-14.ct109-958-14.6573","ct109-958-14",2015-03-02 07:05:32,55.75,68.0253263706688,-67.5904298956144,1,-21.3826423738501,0.106589223662809,"Kerguelen",1.99325,"M"
"ct109-958-14.ct109-958-14.6574","ct109-958-14",2015-03-02 13:05:32,56,68.0745919934873,-67.5713820085494,1,-21.2760928587951,0.106549515054982,"Kerguelen",1.97675,"M"
"ct109-958-14.ct109-958-14.6575","ct109-958-14",2015-03-02 19:05:32,56.25,68.0771723461091,-67.6012243492952,1,-21.1695734564527,0.106519402342395,"Kerguelen",1.953,"M"
"ct109-958-14.ct109-958-14.6576","ct109-958-14",2015-03-03 01:05:32,56.5,68.1186733206046,-67.6130601731588,1,-21.0630742838194,0.106499172633345,"Kerguelen",1.92425,"M"
"ct109-958-14.ct109-958-14.6577","ct109-958-14",2015-03-03 07:05:32,56.75,68.1121051109853,-67.6027768534714,1,-20.956585356787,0.10648892703238,"Kerguelen",1.899,"M"
"ct109-958-14.ct109-958-14.6578","ct109-958-14",2015-03-03 13:05:32,57,68.1464446885403,-67.6147448988084,1,-20.8500962174293,0.106489139357679,"Kerguelen",1.86625,"M"
"ct109-958-14.ct109-958-14.6579","ct109-958-14",2015-03-03 19:05:32,57.25,68.0568366207625,-67.6643018588401,1,-20.7435938126909,0.106502404738426,"Kerguelen",1.8355,"M"
"ct109-958-14.ct109-958-14.6580","ct109-958-14",2015-03-04 01:05:32,57.5,68.0207616540313,-67.6902951974673,1,-20.6370639174402,0.106529895250679,"Kerguelen",1.803,"M"
"ct109-958-14.ct109-958-14.6581","ct109-958-14",2015-03-04 07:05:32,57.75,68.011554452143,-67.6835317037595,1,-20.5304921372807,0.106571780159501,"Kerguelen",1.76075,"M"
"ct109-958-14.ct109-958-14.6582","ct109-958-14",2015-03-04 13:05:32,58,67.9208995824032,-67.7027702780187,1,-20.4238637425961,0.106628394684607,"Kerguelen",1.71675,"M"
"ct109-958-14.ct109-958-14.6583","ct109-958-14",2015-03-04 19:05:32,58.25,67.8219659185078,-67.7264705769133,1,-20.317161907547,0.106701835049128,"Kerguelen",1.6945,"M"
"ct109-958-14.ct109-958-14.6584","ct109-958-14",2015-03-05 01:05:32,58.5,67.8838553626854,-67.6618331479283,1,-20.2103683438807,0.106793563666249,"Kerguelen",1.55325,"M"
"ct109-958-14.ct109-958-14.6585","ct109-958-14",2015-03-05 07:05:32,58.75,67.9786108127372,-67.6206761516164,1,-20.1034645044303,0.106903839450448,"Kerguelen",1.47025,"M"
"ct109-958-14.ct109-958-14.6586","ct109-958-14",2015-03-05 13:05:32,59,68.1354224577382,-67.6838638248861,1,-19.9964318550094,0.107032649420857,"Kerguelen",1.344,"M"
"ct109-958-14.ct109-958-14.6587","ct109-958-14",2015-03-05 19:05:32,59.25,68.2806841440731,-67.7871610876705,1,-19.889257709467,0.107174145542413,"Kerguelen",1.3525,"M"
"ct109-958-14.ct109-958-14.6588","ct109-958-14",2015-03-06 01:05:32,59.5,68.4385325469458,-67.8258838542948,1,-19.7819353697773,0.107322339689714,"Kerguelen",1.386,"M"
"ct109-958-14.ct109-958-14.6589","ct109-958-14",2015-03-06 07:05:32,59.75,68.6052685796343,-67.8351877146936,1,-19.6744583010888,0.1074770686885,"Kerguelen",1.5015,"M"
"ct109-958-14.ct109-958-14.6590","ct109-958-14",2015-03-06 13:05:32,60,68.7658649079835,-67.7286558897828,1,-19.5668220462729,0.107636254815929,"Kerguelen",1.66825,"M"
"ct109-965-14.ct109-965-14.6824","ct109-965-14",2015-01-25 14:18:30,0.25,72.7506291526998,-50.6248262103046,0,-25.4631400280866,0.0143651906166942,"Kerguelen",1,"F"
"ct109-965-14.ct109-965-14.6825","ct109-965-14",2015-01-25 20:18:30,0.5,73.0781553657031,-50.6787893047422,0,-25.4487684631307,0.0143715649559173,"Kerguelen",1,"F"
"ct109-965-14.ct109-965-14.6826","ct109-965-14",2015-01-26 02:18:30,0.75,73.3523958217082,-50.6903023977312,0,-25.4343906872506,0.0143777758801034,"Kerguelen",1,"F"
"ct109-965-14.ct109-965-14.6827","ct109-965-14",2015-01-26 08:18:30,1,73.6694778838715,-50.7467265605007,0,-25.4200068639643,0.014383823286318,"Kerguelen",1,"F"
"ct109-965-14.ct109-965-14.6828","ct109-965-14",2015-01-26 14:18:30,1.25,73.9557320320432,-50.7996014139357,0,-25.4056171568936,0.0143897070707,"Kerguelen",1,"F"
"ct109-965-14.ct109-965-14.6829","ct109-965-14",2015-01-26 20:18:30,1.5,74.2741110978273,-50.8490314963145,0,-25.3912217297661,0.0143954271275115,"Kerguelen",1.00375,"F"
"ct109-965-14.ct109-965-14.6830","ct109-965-14",2015-01-27 02:18:30,1.75,74.4795938602338,-50.8506767202857,0,-25.376820746416,0.0144009833500658,"Kerguelen",1.00475,"F"
"ct109-965-14.ct109-965-14.6831","ct109-965-14",2015-01-27 08:18:30,2,74.7008895153088,-50.8360206885566,0,-25.3624143707835,0.0144063756325474,"Kerguelen",1.03125,"F"
"ct109-965-14.ct109-965-14.6832","ct109-965-14",2015-01-27 14:18:30,2.25,74.7235832170544,-50.826137319767,0,-25.3480025976584,0.0144117731250393,"Kerguelen",1.026,"F"
"ct109-965-14.ct109-965-14.6833","ct109-965-14",2015-01-27 20:18:30,2.5,74.7769306795769,-50.8676873367109,0,-25.3335843458286,0.0144182518298508,"Kerguelen",1.01475,"F"
"ct109-965-14.ct109-965-14.6834","ct109-965-14",2015-01-28 02:18:30,2.75,74.8541252260435,-50.8855141397779,0,-25.3191581118081,0.0144262340205148,"Kerguelen",1.00225,"F"
"ct109-965-14.ct109-965-14.6835","ct109-965-14",2015-01-28 08:18:30,3,75.1309321182812,-50.9135944190387,0,-25.3047223899256,0.0144357218824942,"Kerguelen",1,"F"
"ct109-965-14.ct109-965-14.6836","ct109-965-14",2015-01-28 14:18:30,3.25,75.3437891286075,-51.0266744346064,0,-25.290275673296,0.0144467166295958,"Kerguelen",1,"F"
"ct109-965-14.ct109-965-14.6837","ct109-965-14",2015-01-28 20:18:30,3.5,75.6205953961484,-51.0842404147506,0,-25.2758164538066,0.0144592194893489,"Kerguelen",1,"F"
"ct109-965-14.ct109-965-14.6838","ct109-965-14",2015-01-29 02:18:30,3.75,75.9347836313992,-51.0763965954431,0,-25.2613432221092,0.0144732316973872,"Kerguelen",1,"F"
"ct109-965-14.ct109-965-14.6839","ct109-965-14",2015-01-29 08:18:30,4,76.1504098833084,-51.1024210703968,0,-25.2468544676059,0.0144887545033612,"Kerguelen",1,"F"
"ct109-965-14.ct109-965-14.6840","ct109-965-14",2015-01-29 14:18:30,4.25,76.3899536114468,-51.2263447788834,0,-25.2323486784369,0.0145057891689448,"Kerguelen",1.00425,"F"
"ct109-965-14.ct109-965-14.6841","ct109-965-14",2015-01-29 20:18:30,4.5,76.6019434935683,-51.2803688101574,0,-25.2178243414686,0.0145243369682968,"Kerguelen",1.0165,"F"
"ct109-965-14.ct109-965-14.6842","ct109-965-14",2015-01-30 02:18:30,4.75,76.6448843015551,-51.2823324489088,0,-25.2032799422805,0.01454439918811,"Kerguelen",1.01025,"F"
"ct109-965-14.ct109-965-14.6843","ct109-965-14",2015-01-30 08:18:30,5,76.7885340593079,-51.2936765901512,0,-25.1887139651491,0.0145659771313811,"Kerguelen",1.0035,"F"
"ct109-965-14.ct109-965-14.6844","ct109-965-14",2015-01-30 14:18:30,5.25,77.0032678957018,-51.3336780348307,0,-25.1741248930385,0.0145890721106712,"Kerguelen",1.00025,"F"
"ct109-965-14.ct109-965-14.6845","ct109-965-14",2015-01-30 20:18:30,5.5,77.2941352530193,-51.4314665082631,0,-25.1595112075824,0.0146136854560774,"Kerguelen",1.01175,"F"
"ct109-965-14.ct109-965-14.6846","ct109-965-14",2015-01-31 02:18:30,5.75,77.4314256318882,-51.4232401272162,0,-25.1448713890707,0.0146398185116692,"Kerguelen",1.0035,"F"
"ct109-965-14.ct109-965-14.6847","ct109-965-14",2015-01-31 08:18:30,6,77.6765334525393,-51.4858472754101,0,-25.1302039164343,0.0146674726364593,"Kerguelen",1.00025,"F"
"ct109-965-14.ct109-965-14.6848","ct109-965-14",2015-01-31 14:18:30,6.25,77.8889318279427,-51.5834084076477,0,-25.1155072672294,0.014696649204865,"Kerguelen",1.0015,"F"
"ct109-965-14.ct109-965-14.6849","ct109-965-14",2015-01-31 20:18:30,6.5,77.9980548748973,-51.6152732113048,0,-25.1007798674084,0.0147273998210407,"Kerguelen",1.00025,"F"
"ct109-965-14.ct109-965-14.6850","ct109-965-14",2015-02-01 02:18:30,6.75,78.249034850451,-51.65790260514,0,-25.0860143606548,0.014765506753589,"Kerguelen",1,"F"
"ct109-965-14.ct109-965-14.6851","ct109-965-14",2015-02-01 08:18:30,7,78.4337668654607,-51.7533588111591,0,-25.0711923105512,0.0148220501035412,"Kerguelen",1,"F"
"ct109-965-14.ct109-965-14.6852","ct109-965-14",2015-02-01 14:18:30,7.25,78.6351114598702,-51.8369343283586,0,-25.0562940657587,0.014898244792555,"Kerguelen",1,"F"
"ct109-965-14.ct109-965-14.6853","ct109-965-14",2015-02-01 20:18:30,7.5,78.8293314894974,-51.9203928332934,0,-25.041301291887,0.0149927738716638,"Kerguelen",1.001,"F"
"ct109-965-14.ct109-965-14.6854","ct109-965-14",2015-02-02 02:18:30,7.75,78.9383790471124,-51.9815959809123,0,-25.0261970539324,0.0151042379546329,"Kerguelen",1.00025,"F"
"ct109-965-14.ct109-965-14.6855","ct109-965-14",2015-02-02 08:18:30,8,79.0909344256045,-52.0528404401267,0,-25.0109644696885,0.0152325842439072,"Kerguelen",1.00125,"F"
"ct109-965-14.ct109-965-14.6856","ct109-965-14",2015-02-02 14:18:30,8.25,79.1424054696897,-52.1214983892034,0,-24.9955866278533,0.0153778418351735,"Kerguelen",1.00075,"F"
"ct109-965-14.ct109-965-14.6857","ct109-965-14",2015-02-02 20:18:30,8.5,79.3704740985223,-52.2204203089166,0,-24.9800456612155,0.0155409666378392,"Kerguelen",1,"F"
"ct109-965-14.ct109-965-14.6858","ct109-965-14",2015-02-03 02:18:30,8.75,79.6190808087778,-52.2790101375937,0,-24.9643221369072,0.0157235243082421,"Kerguelen",1,"F"
"ct109-965-14.ct109-965-14.6859","ct109-965-14",2015-02-03 08:18:30,9,79.8448677478406,-52.3240452037203,0,-24.9483964578479,0.0159256790592838,"Kerguelen",1,"F"
"ct109-965-14.ct109-965-14.6860","ct109-965-14",2015-02-03 14:18:30,9.25,79.9783180199242,-52.392149575702,0,-24.9322490190216,0.0161474388263666,"Kerguelen",1,"F"
"ct109-965-14.ct109-965-14.6861","ct109-965-14",2015-02-03 20:18:30,9.5,80.2338037094848,-52.5453768566633,0,-24.9158603784065,0.016388640615031,"Kerguelen",1.00025,"F"
"ct109-965-14.ct109-965-14.6862","ct109-965-14",2015-02-04 02:18:30,9.75,80.3872432926244,-52.605215806213,0,-24.8992112113318,0.0166491670747587,"Kerguelen",1.00025,"F"
"ct109-965-14.ct109-965-14.6863","ct109-965-14",2015-02-04 08:18:30,10,80.5683343406277,-52.7470938125099,0,-24.8822821737571,0.0169290375747061,"Kerguelen",1.001,"F"
"ct109-965-14.ct109-965-14.6864","ct109-965-14",2015-02-04 14:18:30,10.25,80.6409362487006,-52.8193824193087,0,-24.8650538978586,0.0172282758984982,"Kerguelen",1.0005,"F"
"ct109-965-14.ct109-965-14.6865","ct109-965-14",2015-02-04 20:18:30,10.5,80.7930364044708,-52.9233377232176,0,-24.8475069909696,0.017546906888935,"Kerguelen",1,"F"
"ct109-965-14.ct109-965-14.6866","ct109-965-14",2015-02-05 02:18:30,10.75,81.038316614826,-53.0214898124785,0,-24.8296219579531,0.0178850330165264,"Kerguelen",1.00025,"F"
"ct109-965-14.ct109-965-14.6867","ct109-965-14",2015-02-05 08:18:30,11,81.1582590874347,-53.1130343531297,0,-24.8113790139177,0.0182429440354237,"Kerguelen",1,"F"
"ct109-965-14.ct109-965-14.6868","ct109-965-14",2015-02-05 14:18:30,11.25,81.3728858171971,-53.1941843143047,0,-24.7927582888957,0.018620725021945,"Kerguelen",1.00025,"F"
"ct109-965-14.ct109-965-14.6869","ct109-965-14",2015-02-05 20:18:30,11.5,81.5743187447986,-53.294649647876,0,-24.7737398826427,0.0190184062530796,"Kerguelen",1.003,"F"
"ct109-965-14.ct109-965-14.6870","ct109-965-14",2015-02-06 02:18:30,11.75,81.6476028713559,-53.3671189323612,0,-24.7543039859094,0.019435896733222,"Kerguelen",1.0035,"F"
"ct109-965-14.ct109-965-14.6871","ct109-965-14",2015-02-06 08:18:30,12,81.718207926303,-53.4386775197745,0,-24.7344314521912,0.0198725337182459,"Kerguelen",1.001,"F"
"ct109-965-14.ct109-965-14.6872","ct109-965-14",2015-02-06 14:18:30,12.25,81.9183509230717,-53.5483531522133,0,-24.7141033459749,0.0203281062162691,"Kerguelen",1,"F"
"ct109-965-14.ct109-965-14.6873","ct109-965-14",2015-02-06 20:18:30,12.5,82.1251694109885,-53.6736698437469,0,-24.6933006966695,0.0208026493054209,"Kerguelen",1,"F"
"ct109-965-14.ct109-965-14.6874","ct109-965-14",2015-02-07 02:18:30,12.75,82.382616563636,-53.7712658739481,0,-24.6720044965776,0.0212962000919414,"Kerguelen",1,"F"
"ct109-965-14.ct109-965-14.6875","ct109-965-14",2015-02-07 08:18:30,13,82.5366535564558,-53.8733764650285,0,-24.6501956990372,0.0218087975403763,"Kerguelen",1,"F"
"ct109-965-14.ct109-965-14.6876","ct109-965-14",2015-02-07 14:18:30,13.25,82.5999132305554,-53.997033643457,0,-24.6278552164681,0.0223404825691248,"Kerguelen",1.00075,"F"
"ct109-965-14.ct109-965-14.6877","ct109-965-14",2015-02-07 20:18:30,13.5,82.7743700534176,-54.0787343007636,0,-24.6049641751368,0.0228910413312133,"Kerguelen",1,"F"
"ct109-965-14.ct109-965-14.6878","ct109-965-14",2015-02-08 02:18:30,13.75,83.017492829275,-54.1725767785825,0,-24.5815102460734,0.0234539290633995,"Kerguelen",1,"F"
"ct109-965-14.ct109-965-14.6879","ct109-965-14",2015-02-08 08:18:30,14,83.2580384964224,-54.2671673120608,0,-24.5574880571388,0.0240221889346165,"Kerguelen",1.00025,"F"
"ct109-965-14.ct109-965-14.6880","ct109-965-14",2015-02-08 14:18:30,14.25,83.3809705968629,-54.3808866757834,0,-24.5328925458857,0.0245955112531782,"Kerguelen",1,"F"
"ct109-965-14.ct109-965-14.6881","ct109-965-14",2015-02-08 20:18:30,14.5,83.5368622072767,-54.493007847431,0,-24.5077186215621,0.0251739243235544,"Kerguelen",1.00075,"F"
"ct109-965-14.ct109-965-14.6882","ct109-965-14",2015-02-09 02:18:30,14.75,83.6326511289899,-54.5423867962513,0,-24.4819611642103,0.0257574573517605,"Kerguelen",1.00125,"F"
"ct109-965-14.ct109-965-14.6883","ct109-965-14",2015-02-09 08:18:30,15,83.6985031892819,-54.590619931516,0,-24.4556150237353,0.0263461404750837,"Kerguelen",1.00025,"F"
"ct109-965-14.ct109-965-14.6884","ct109-965-14",2015-02-09 14:18:30,15.25,83.7423148881901,-54.6883069927427,0,-24.4286750189394,0.0269400047958723,"Kerguelen",1,"F"
"ct109-965-14.ct109-965-14.6885","ct109-965-14",2015-02-09 20:18:30,15.5,83.8193554347002,-54.8510962888359,0,-24.4011360004242,0.0275390185151547,"Kerguelen",1.004,"F"
"ct109-965-14.ct109-965-14.6886","ct109-965-14",2015-02-10 02:18:30,15.75,83.8569692797016,-54.9048651439097,0,-24.3729937164019,0.0281422840223644,"Kerguelen",1.00125,"F"
"ct109-965-14.ct109-965-14.6887","ct109-965-14",2015-02-10 08:18:30,16,83.9797102696914,-54.9704396864097,0,-24.344244586501,0.0287491299009068,"Kerguelen",1.00025,"F"
"ct109-965-14.ct109-965-14.6888","ct109-965-14",2015-02-10 14:18:30,16.25,84.1044334751945,-55.0409252527136,0,-24.3148850157809,0.0293595707200556,"Kerguelen",1.00025,"F"
"ct109-965-14.ct109-965-14.6889","ct109-965-14",2015-02-10 20:18:30,16.5,84.1193160064859,-55.1406717577353,0,-24.2849115283214,0.0299734874594837,"Kerguelen",1,"F"
"ct109-965-14.ct109-965-14.6890","ct109-965-14",2015-02-11 02:18:30,16.75,84.2673882864677,-55.2868639400087,0,-24.2543214283648,0.0305900999566122,"Kerguelen",1,"F"
"ct109-965-14.ct109-965-14.6891","ct109-965-14",2015-02-11 08:18:30,17,84.4584363909912,-55.4538095199416,0,-24.2231122588046,0.0312091695601785,"Kerguelen",1,"F"
"ct109-965-14.ct109-965-14.6892","ct109-965-14",2015-02-11 14:18:30,17.25,84.5101975554921,-55.5930240401802,0,-24.1912815297008,0.0318307291038461,"Kerguelen",1.00025,"F"
"ct109-965-14.ct109-965-14.6893","ct109-965-14",2015-02-11 20:18:30,17.5,84.5664816581156,-55.7339501556428,0,-24.1588267172331,0.0324548124676305,"Kerguelen",1,"F"
"ct109-965-14.ct109-965-14.6894","ct109-965-14",2015-02-12 02:18:30,17.75,84.6066176263326,-55.8755074629677,0,-24.1257452628144,0.0330814544187902,"Kerguelen",1.00025,"F"
"ct109-965-14.ct109-965-14.6895","ct109-965-14",2015-02-12 08:18:30,18,84.7631671074641,-55.9822894199899,0,-24.0920345721762,0.0337106906381335,"Kerguelen",1,"F"
"ct109-965-14.ct109-965-14.6896","ct109-965-14",2015-02-12 14:18:30,18.25,84.8887767343081,-56.0847638166597,0,-24.0576920144235,0.0343425577527229,"Kerguelen",1,"F"
"ct109-965-14.ct109-965-14.6897","ct109-965-14",2015-02-12 20:18:30,18.5,84.9569482543388,-56.2537090858081,0,-24.0227149197432,0.0349770946802552,"Kerguelen",1,"F"
"ct109-965-14.ct109-965-14.6898","ct109-965-14",2015-02-13 02:18:30,18.75,84.9151005438374,-56.4287566163296,0,-23.9870991183162,0.0356158014270302,"Kerguelen",1,"F"
"ct109-965-14.ct109-965-14.6899","ct109-965-14",2015-02-13 08:18:30,19,85.0033189695538,-56.6476309055797,0,-23.9508361392265,0.0362629790897406,"Kerguelen",1,"F"
"ct109-965-14.ct109-965-14.6900","ct109-965-14",2015-02-13 14:18:30,19.25,85.1233612630193,-56.926258260892,0,-23.9139166848393,0.0369194543871493,"Kerguelen",1,"F"
"ct109-965-14.ct109-965-14.6901","ct109-965-14",2015-02-13 20:18:30,19.5,85.2073943027707,-57.0910803719015,0,-23.8763313979257,0.0375852869135967,"Kerguelen",1.0005,"F"
"ct109-965-14.ct109-965-14.6902","ct109-965-14",2015-02-14 02:18:30,19.75,85.2912246173921,-57.1910027971782,0,-23.8380708594471,0.0382605384786572,"Kerguelen",1,"F"
"ct109-965-14.ct109-965-14.6903","ct109-965-14",2015-02-14 08:18:30,20,85.5896388969109,-57.3423574470856,0,-23.7991255862605,0.0389452731866163,"Kerguelen",1,"F"
"ct109-965-14.ct109-965-14.6904","ct109-965-14",2015-02-14 14:18:30,20.25,85.7415148429952,-57.606657887509,0,-23.75948602873,0.039639557530477,"Kerguelen",1.00025,"F"
"ct109-965-14.ct109-965-14.6905","ct109-965-14",2015-02-14 20:18:30,20.5,85.7095997980977,-57.7635579367973,0,-23.7191425775491,0.0403434511808298,"Kerguelen",1,"F"
"ct109-965-14.ct109-965-14.6906","ct109-965-14",2015-02-15 02:18:30,20.75,85.7261664942016,-57.8968305479251,0,-23.6780868438853,0.0410557336638639,"Kerguelen",1,"F"
"ct109-965-14.ct109-965-14.6907","ct109-965-14",2015-02-15 08:18:30,21,85.8198019045406,-58.0628631645255,0,-23.636312974373,0.0417738695122877,"Kerguelen",1,"F"
"ct109-965-14.ct109-965-14.6908","ct109-965-14",2015-02-15 14:18:30,21.25,85.7155592492891,-58.2478436753706,0,-23.5938153642359,0.0424976101370822,"Kerguelen",1,"F"
"ct109-965-14.ct109-965-14.6909","ct109-965-14",2015-02-15 20:18:30,21.5,85.6941427778358,-58.4605461143286,0,-23.5505927887587,0.0432225754772197,"Kerguelen",1.00925,"F"
"ct109-965-14.ct109-965-14.6910","ct109-965-14",2015-02-16 02:18:30,21.75,85.6803642332278,-58.536294813383,0,-23.5066618221247,0.0439309666340093,"Kerguelen",1,"F"
"ct109-965-14.ct109-965-14.6911","ct109-965-14",2015-02-16 08:18:30,22,85.5059920594215,-58.7005543238349,0,-23.4620430580847,0.0446187640399831,"Kerguelen",1,"F"
"ct109-965-14.ct109-965-14.6912","ct109-965-14",2015-02-16 14:18:30,22.25,85.3465273779336,-58.8129497939402,0,-23.4167569994386,0.045286058646099,"Kerguelen",1,"F"
"ct109-965-14.ct109-965-14.6913","ct109-965-14",2015-02-16 20:18:30,22.5,85.2223739018074,-58.9063822363308,0,-23.3708235387218,0.0459334607168016,"Kerguelen",1,"F"
"ct109-965-14.ct109-965-14.6914","ct109-965-14",2015-02-17 02:18:30,22.75,85.1727134051468,-59.0426573941398,0,-23.3242583203931,0.0465652183286952,"Kerguelen",1,"F"
"ct109-965-14.ct109-965-14.6915","ct109-965-14",2015-02-17 08:18:30,23,85.0782087088573,-59.1743158431719,0,-23.277075235281,0.047183085112093,"Kerguelen",1.00025,"F"
"ct109-965-14.ct109-965-14.6916","ct109-965-14",2015-02-17 14:18:30,23.25,85.1230810840813,-59.2877432814448,0,-23.22928840753,0.0477868277509674,"Kerguelen",1.00175,"F"
"ct109-965-14.ct109-965-14.6917","ct109-965-14",2015-02-17 20:18:30,23.5,85.0453915225687,-59.3460047544873,0,-23.1809127667976,0.0483756407324787,"Kerguelen",1.00075,"F"
"ct109-965-14.ct109-965-14.6918","ct109-965-14",2015-02-18 02:18:30,23.75,84.9464658870394,-59.4275769155506,0,-23.1319634280619,0.0489493387356627,"Kerguelen",1.001,"F"
"ct109-965-14.ct109-965-14.6919","ct109-965-14",2015-02-18 08:18:30,24,84.9103922080987,-59.496172017405,0,-23.0824555237006,0.0495079043612762,"Kerguelen",1.0005,"F"
"ct109-965-14.ct109-965-14.6920","ct109-965-14",2015-02-18 14:18:30,24.25,84.70194922009,-59.5447040401418,0,-23.0324037872508,0.0500517364498076,"Kerguelen",1,"F"
"ct109-965-14.ct109-965-14.6921","ct109-965-14",2015-02-18 20:18:30,24.5,84.5055131045507,-59.6447419963822,0,-22.9818205987163,0.0505831885345087,"Kerguelen",1,"F"
"ct109-965-14.ct109-965-14.6922","ct109-965-14",2015-02-19 02:18:30,24.75,84.4440300702998,-59.7637328773065,0,-22.93071751425,0.0511030844663529,"Kerguelen",1.0005,"F"
"ct109-965-14.ct109-965-14.6923","ct109-965-14",2015-02-19 08:18:30,25,84.5040513179813,-59.8620975410388,0,-22.8791060994318,0.0516114148181923,"Kerguelen",1.00125,"F"
"ct109-965-14.ct109-965-14.6924","ct109-965-14",2015-02-19 14:18:30,25.25,84.365603020872,-59.946909889072,0,-22.8269979317287,0.0521081677030688,"Kerguelen",1.00075,"F"
"ct109-965-14.ct109-965-14.6925","ct109-965-14",2015-02-19 20:18:30,25.5,84.3295818991988,-60.0316915316287,0,-22.7744046362934,0.0525932954353214,"Kerguelen",1.00025,"F"
"ct109-965-14.ct109-965-14.6926","ct109-965-14",2015-02-20 02:18:30,25.75,84.2616913321468,-60.0990197605885,0,-22.7213399729175,0.0530646633758347,"Kerguelen",1,"F"
"ct109-965-14.ct109-965-14.6927","ct109-965-14",2015-02-20 08:18:30,26,84.1602397754593,-60.2170240694082,0,-22.6678210534511,0.0535189194664054,"Kerguelen",1,"F"
"ct109-965-14.ct109-965-14.6928","ct109-965-14",2015-02-20 14:18:30,26.25,84.1219258964065,-60.3488170851984,0,-22.613865324196,0.0539557292551424,"Kerguelen",1,"F"
"ct109-965-14.ct109-965-14.6929","ct109-965-14",2015-02-20 20:18:30,26.5,84.1019111175659,-60.4742695509087,0,-22.5594902792441,0.0543750449518682,"Kerguelen",1,"F"
"ct109-965-14.ct109-965-14.6930","ct109-965-14",2015-02-21 02:18:30,26.75,84.0574749025197,-60.6197045280063,0,-22.5047134633044,0.0547768159397444,"Kerguelen",1,"F"
"ct109-965-14.ct109-965-14.6931","ct109-965-14",2015-02-21 08:18:30,27,84.0787166916679,-60.7499765835097,0,-22.4495524745569,0.0551609887474741,"Kerguelen",1.00025,"F"
"ct109-965-14.ct109-965-14.6932","ct109-965-14",2015-02-21 14:18:30,27.25,84.0986471819171,-60.9262613454221,0,-22.3940249675283,0.0555275070286021,"Kerguelen",1,"F"
"ct109-965-14.ct109-965-14.6933","ct109-965-14",2015-02-21 20:18:30,27.5,84.0717714629319,-61.0495604610039,0,-22.3381471326363,0.0558778348920486,"Kerguelen",1.00025,"F"
"ct109-965-14.ct109-965-14.6934","ct109-965-14",2015-02-22 02:18:30,27.75,83.961634894902,-61.1349707432379,0,-22.2819274933033,0.0562196393329634,"Kerguelen",1.00025,"F"
"ct109-965-14.ct109-965-14.6935","ct109-965-14",2015-02-22 08:18:30,28,84.0273669755734,-61.2613271100536,0,-22.2253721502222,0.0565553430810467,"Kerguelen",1,"F"
"ct109-965-14.ct109-965-14.6936","ct109-965-14",2015-02-22 14:18:30,28.25,84.2088077860473,-61.4047324694766,0,-22.1684872098669,0.0568849403553034,"Kerguelen",1,"F"
"ct109-965-14.ct109-965-14.6937","ct109-965-14",2015-02-22 20:18:30,28.5,84.4255481925354,-61.4826812443733,0,-22.1112787862102,0.0572084236566989,"Kerguelen",1.00075,"F"
"ct109-965-14.ct109-965-14.6938","ct109-965-14",2015-02-23 02:18:30,28.75,84.5478719581635,-61.4988395878243,0,-22.0537530015247,0.0575257846855332,"Kerguelen",1,"F"
"ct109-965-14.ct109-965-14.6939","ct109-965-14",2015-02-23 08:18:30,29,84.8606107341578,-61.4958614178379,0,-21.9959159872063,0.0578370143184431,"Kerguelen",1.0005,"F"
"ct109-965-14.ct109-965-14.6940","ct109-965-14",2015-02-23 14:18:30,29.25,85.0695611788842,-61.5225839765622,0,-21.9377738846081,0.0581421025981466,"Kerguelen",1.00125,"F"
"ct109-965-14.ct109-965-14.6941","ct109-965-14",2015-02-23 20:18:30,29.5,85.2627651731703,-61.4815701731748,0,-21.8793328458949,0.0584410387132694,"Kerguelen",1.00525,"F"
"ct109-965-14.ct109-965-14.6942","ct109-965-14",2015-02-24 02:18:30,29.75,85.4936164568954,-61.4690951200569,0,-21.8205990349132,0.0587338109816621,"Kerguelen",1.0725,"F"
"ct109-965-14.ct109-965-14.6943","ct109-965-14",2015-02-24 08:18:30,30,85.5280280993449,-61.4461302194938,0,-21.7615786280773,0.0590204068359107,"Kerguelen",1.08325,"F"
"ct109-965-14.ct109-965-14.6944","ct109-965-14",2015-02-24 14:18:30,30.25,85.5092809053898,-61.401123611739,0,-21.7022778152781,0.0593008127991512,"Kerguelen",1.09425,"F"
"ct109-965-14.ct109-965-14.6945","ct109-965-14",2015-02-24 20:18:30,30.5,85.636179916683,-61.3311574892378,0,-21.6427028008026,0.0595750144755491,"Kerguelen",1.11175,"F"
"ct109-965-14.ct109-965-14.6946","ct109-965-14",2015-02-25 02:18:30,30.75,85.6613886787973,-61.3528068418121,0,-21.582859804275,0.0598429965275649,"Kerguelen",1.0875,"F"
"ct109-965-14.ct109-965-14.6947","ct109-965-14",2015-02-25 08:18:30,31,85.7308731336941,-61.2757557298668,0,-21.5227550616147,0.0601047426602663,"Kerguelen",1.01075,"F"
"ct109-965-14.ct109-965-14.6948","ct109-965-14",2015-02-25 14:18:30,31.25,85.8762053466902,-61.1778887520395,0,-21.4623948260134,0.0603602356013477,"Kerguelen",1.00425,"F"
"ct109-965-14.ct109-965-14.6949","ct109-965-14",2015-02-25 20:18:30,31.5,85.9194247571003,-61.1068405787868,0,-21.401785368926,0.0606094570873933,"Kerguelen",1.0025,"F"
"ct109-965-14.ct109-965-14.6950","ct109-965-14",2015-02-26 02:18:30,31.75,86.0696879306514,-61.050213006435,0,-21.340932981087,0.0608523878390499,"Kerguelen",1.00125,"F"
"ct109-965-14.ct109-965-14.6951","ct109-965-14",2015-02-26 08:18:30,32,86.3024251339428,-61.0087038950438,0,-21.2798439735382,0.061089007548723,"Kerguelen",1,"F"
"ct109-965-14.ct109-965-14.6952","ct109-965-14",2015-02-26 14:18:30,32.25,86.5851505900018,-60.9931287880144,0,-21.2185246786793,0.0613192948589442,"Kerguelen",1,"F"
"ct109-965-14.ct109-965-14.6953","ct109-965-14",2015-02-26 20:18:30,32.5,86.8715940074088,-60.9800836296433,0,-21.1569814513343,0.0615432273449928,"Kerguelen",1.00025,"F"
"ct109-965-14.ct109-965-14.6954","ct109-965-14",2015-02-27 02:18:30,32.75,87.0746164704136,-60.9746288012418,0,-21.0952206698392,0.0617607814950571,"Kerguelen",1,"F"
"ct109-965-14.ct109-965-14.6955","ct109-965-14",2015-02-27 08:18:30,33,87.3058080463278,-61.0167025976015,0,-21.033248737144,0.0619719326952317,"Kerguelen",1,"F"
"ct109-965-14.ct109-965-14.6956","ct109-965-14",2015-02-27 14:18:30,33.25,87.6436669260443,-61.0584024473502,0,-20.9710720819402,0.0621766552037883,"Kerguelen",1,"F"
"ct109-965-14.ct109-965-14.6957","ct109-965-14",2015-02-27 20:18:30,33.5,87.8454570669704,-61.1310220827543,0,-20.9086971598009,0.0623749221393299,"Kerguelen",1,"F"
"ct109-965-14.ct109-965-14.6958","ct109-965-14",2015-02-28 02:18:30,33.75,88.1730860908195,-61.130798138339,0,-20.8461304543432,0.062566705457695,"Kerguelen",1,"F"
"ct109-965-14.ct109-965-14.6959","ct109-965-14",2015-02-28 08:18:30,34,88.6570177019669,-61.0782305809515,0,-20.7833777183257,0.0627527360175295,"Kerguelen",1,"F"
"ct109-965-14.ct109-965-14.6960","ct109-965-14",2015-02-28 14:18:30,34.25,88.9502744783528,-61.0736198419944,0,-20.7204296510737,0.0629480672519278,"Kerguelen",1.009,"F"
"ct109-965-14.ct109-965-14.6961","ct109-965-14",2015-02-28 20:18:30,34.5,89.1737515593168,-61.1508912978602,0,-20.6572657915152,0.0631638595585238,"Kerguelen",1.0065,"F"
"ct109-965-14.ct109-965-14.6962","ct109-965-14",2015-03-01 02:18:30,34.75,89.3901176419055,-61.1671652734952,0,-20.5938874033692,0.0633783881460265,"Kerguelen",1.00125,"F"
"ct109-965-14.ct109-965-14.6963","ct109-965-14",2015-03-01 08:18:30,35,89.599091362931,-61.2016959464416,0,-20.530296231067,0.0635911723021826,"Kerguelen",1.001,"F"
"ct109-965-14.ct109-965-14.6964","ct109-965-14",2015-03-01 14:18:30,35.25,89.8399375612116,-61.150688024269,0,-20.4664918774225,0.0638043536444699,"Kerguelen",1.002,"F"
"ct109-965-14.ct109-965-14.6965","ct109-965-14",2015-03-01 20:18:30,35.5,89.997558336931,-61.1925176771303,0,-20.4024739254349,0.0640179519875994,"Kerguelen",1.00025,"F"
"ct109-965-14.ct109-965-14.6966","ct109-965-14",2015-03-02 02:18:30,35.75,90.1513777531068,-61.2387629415336,0,-20.3382419379618,0.0642319874731206,"Kerguelen",1.00025,"F"
"ct109-965-14.ct109-965-14.6967","ct109-965-14",2015-03-02 08:18:30,36,90.3238465526623,-61.3062102669231,0,-20.2737954573796,0.0644464805822476,"Kerguelen",1.002,"F"
"ct109-965-14.ct109-965-14.6968","ct109-965-14",2015-03-02 14:18:30,36.25,90.4458604362568,-61.3365915449198,0,-20.2091339155099,0.06466154186964,"Kerguelen",1.00225,"F"
"ct109-965-14.ct109-965-14.6969","ct109-965-14",2015-03-02 20:18:30,36.5,90.4794399872959,-61.3420747991052,0,-20.1442559037801,0.0648780117298048,"Kerguelen",1.00275,"F"
"ct109-965-14.ct109-965-14.6970","ct109-965-14",2015-03-03 02:18:30,36.75,90.5827733052251,-61.2689589638066,0,-20.0791595469777,0.0650963568024632,"Kerguelen",1.0005,"F"
"ct109-965-14.ct109-965-14.6971","ct109-965-14",2015-03-03 08:18:30,37,90.8341683876117,-61.2024176816297,0,-20.0138429331924,0.0653166137853101,"Kerguelen",1.00025,"F"
"ct109-965-14.ct109-965-14.6972","ct109-965-14",2015-03-03 14:18:30,37.25,91.0811379058244,-61.2210035046234,0,-19.9483040610711,0.0655388721212152,"Kerguelen",1,"F"
"ct109-965-14.ct109-965-14.6973","ct109-965-14",2015-03-03 20:18:30,37.5,91.357907597663,-61.2624892809748,0,-19.8825399444951,0.0657641165759892,"Kerguelen",1.0005,"F"
"ct109-965-14.ct109-965-14.6974","ct109-965-14",2015-03-04 02:18:30,37.75,91.4806866080707,-61.2880847905921,0,-19.8165467611528,0.0659931833423527,"Kerguelen",1.0005,"F"
"ct109-965-14.ct109-965-14.6975","ct109-965-14",2015-03-04 08:18:30,38,91.5547330627098,-61.3407714041748,0,-19.7503206139394,0.0662261472134357,"Kerguelen",1.0015,"F"
"ct109-965-14.ct109-965-14.6976","ct109-965-14",2015-03-04 14:18:30,38.25,91.6482737469739,-61.3494100993966,0,-19.6838575536871,0.0664630602522365,"Kerguelen",1.00025,"F"
"ct109-965-14.ct109-965-14.6977","ct109-965-14",2015-03-04 20:18:30,38.5,91.7859865155305,-61.3339172500936,0,-19.6171535777838,0.0667039759033317,"Kerguelen",1,"F"
"ct109-965-14.ct109-965-14.6978","ct109-965-14",2015-03-05 02:18:30,38.75,92.1278970941663,-61.3099609521506,0,-19.5502046287463,0.0669489490374958,"Kerguelen",1,"F"
"ct109-965-14.ct109-965-14.6979","ct109-965-14",2015-03-05 08:18:30,39,92.510227408252,-61.3002250972001,0,-19.4830065927445,0.0671980360017865,"Kerguelen",1,"F"
"ct109-965-14.ct109-965-14.6980","ct109-965-14",2015-03-05 14:18:30,39.25,92.8264765776109,-61.334276989,0,-19.4155552980815,0.0674512946630124,"Kerguelen",1.004,"F"
"ct109-965-14.ct109-965-14.6981","ct109-965-14",2015-03-05 20:18:30,39.5,92.9064728436967,-61.3855020849923,0,-19.3478465136174,0.0677087844641128,"Kerguelen",1.00075,"F"
"ct109-965-14.ct109-965-14.6982","ct109-965-14",2015-03-06 02:18:30,39.75,93.2800343011437,-61.4291364843445,0,-19.2798759471414,0.0679705664759916,"Kerguelen",1,"F"
"ct109-965-14.ct109-965-14.6983","ct109-965-14",2015-03-06 08:18:30,40,93.5408505370142,-61.4746774305086,0,-19.2116392436896,0.068236703451785,"Kerguelen",1,"F"
"ct109-965-14.ct109-965-14.6984","ct109-965-14",2015-03-06 14:18:30,40.25,93.79211423222,-61.5882076859075,0,-19.1431319838036,0.0685072598860054,"Kerguelen",1.00025,"F"
"ct109-965-14.ct109-965-14.6985","ct109-965-14",2015-03-06 20:18:30,40.5,94.0716698752843,-61.6414463412495,0,-19.0743496817272,0.06878230207642,"Kerguelen",1,"F"
"ct109-965-14.ct109-965-14.6986","ct109-965-14",2015-03-07 02:18:30,40.75,94.4551192354766,-61.6461092228774,0,-19.0052877835445,0.0690618981826985,"Kerguelen",1,"F"
"ct109-965-14.ct109-965-14.6987","ct109-965-14",2015-03-07 08:18:30,41,94.8988624708843,-61.7092592291748,0,-18.9359416652487,0.0693461182957406,"Kerguelen",1.0005,"F"
"ct109-965-14.ct109-965-14.6988","ct109-965-14",2015-03-07 14:18:30,41.25,95.1649316506264,-61.7278291968898,0,-18.8663066307428,0.0696350345059604,"Kerguelen",1,"F"
"ct109-965-14.ct109-965-14.6989","ct109-965-14",2015-03-07 20:18:30,41.5,95.411081211136,-61.694823075778,0,-18.7963767526666,0.0699298780762275,"Kerguelen",1.0005,"F"
"ct109-965-14.ct109-965-14.6990","ct109-965-14",2015-03-08 02:18:30,41.75,95.6859831915325,-61.7186558121561,0,-18.7261398040974,0.0702369485691356,"Kerguelen",1.00025,"F"
"ct109-965-14.ct109-965-14.6991","ct109-965-14",2015-03-08 08:18:30,42,95.9495402591047,-61.7496265791586,0,-18.6555813308169,0.0705584732805492,"Kerguelen",1,"F"
"ct109-965-14.ct109-965-14.6992","ct109-965-14",2015-03-08 14:18:30,42.25,96.1479313827952,-61.7384706345061,0,-18.5846867001137,0.0708946307031499,"Kerguelen",1,"F"
"ct109-965-14.ct109-965-14.6993","ct109-965-14",2015-03-08 20:18:30,42.5,96.5707070981379,-61.7336339633448,0,-18.5134410961239,0.071245603989839,"Kerguelen",1,"F"
"ct109-965-14.ct109-965-14.6994","ct109-965-14",2015-03-09 02:18:30,42.75,96.8439183094355,-61.719497502604,0,-18.4418295134689,0.0716115826550151,"Kerguelen",1,"F"
"ct109-965-14.ct109-965-14.6995","ct109-965-14",2015-03-09 08:18:30,43,97.2124642097313,-61.7121121457709,0,-18.3698367505901,0.0719927628787448,"Kerguelen",1,"F"
"ct109-965-14.ct109-965-14.6996","ct109-965-14",2015-03-09 14:18:30,43.25,97.6233393007431,-61.6825692143411,0,-18.2974474027679,0.0723893478222243,"Kerguelen",1,"F"
"ct109-965-14.ct109-965-14.6997","ct109-965-14",2015-03-09 20:18:30,43.5,97.9807462961815,-61.670358562224,0,-18.2246458547972,0.0728015479706606,"Kerguelen",1,"F"
"ct109-965-14.ct109-965-14.6998","ct109-965-14",2015-03-10 02:18:30,43.75,98.2985600944677,-61.6655354021092,0,-18.1514162733173,0.0732295814799638,"Kerguelen",1,"F"
"ct109-965-14.ct109-965-14.6999","ct109-965-14",2015-03-10 08:18:30,44,98.75044123701,-61.6263174504371,0,-18.0777425987554,0.0736736745618222,"Kerguelen",1,"F"
"ct109-965-14.ct109-965-14.7000","ct109-965-14",2015-03-10 14:18:30,44.25,99.1914057522451,-61.5810240546664,0,-18.0036085368778,0.0741340618776232,"Kerguelen",1,"F"
"ct109-965-14.ct109-965-14.7001","ct109-965-14",2015-03-10 20:18:30,44.5,99.4491949768347,-61.5094456606715,0,-17.9289975499166,0.0746109869611905,"Kerguelen",1.0005,"F"
"ct109-965-14.ct109-965-14.7002","ct109-965-14",2015-03-11 02:18:30,44.75,99.5974762949112,-61.4588649545983,0,-17.8538928472485,0.0751047026681106,"Kerguelen",1,"F"
"ct109-965-14.ct109-965-14.7003","ct109-965-14",2015-03-11 08:18:30,45,99.7713440276439,-61.3918745575916,0,-17.7782773756054,0.0756154716431423,"Kerguelen",1,"F"
"ct109-965-14.ct109-965-14.7004","ct109-965-14",2015-03-11 14:18:30,45.25,99.9156073186044,-61.2957858173069,0,-17.7021338087765,0.0761435668288901,"Kerguelen",1,"F"
"ct109-965-14.ct109-965-14.7005","ct109-965-14",2015-03-11 20:18:30,45.5,100.268539964655,-61.2808176857888,0,-17.6254441956139,0.0766896131626199,"Kerguelen",1,"F"
"ct109-965-14.ct109-965-14.7006","ct109-965-14",2015-03-12 02:18:30,45.75,100.609665001528,-61.2382184319648,0,-17.5481867471118,0.0772574485020966,"Kerguelen",1,"F"
"ct109-965-14.ct109-965-14.7007","ct109-965-14",2015-03-12 08:18:30,46,100.870241612757,-61.1477422925554,0,-17.4703372223272,0.0778495247846012,"Kerguelen",1,"F"
"ct109-965-14.ct109-965-14.7008","ct109-965-14",2015-03-12 14:18:30,46.25,101.206650359324,-61.1040559501095,0,-17.391870956346,0.0784662659811863,"Kerguelen",1,"F"
"ct109-965-14.ct109-965-14.7009","ct109-965-14",2015-03-12 20:18:30,46.5,101.53783056998,-61.0864939693656,0,-17.3127628700659,0.0791080862800941,"Kerguelen",1,"F"
"ct109-965-14.ct109-965-14.7010","ct109-965-14",2015-03-13 02:18:30,46.75,101.836135103599,-61.0117675020601,0,-17.2329874520125,0.0797754180533655,"Kerguelen",1,"F"
"ct109-965-14.ct109-965-14.7011","ct109-965-14",2015-03-13 08:18:30,47,102.091711599195,-60.903772253457,0,-17.1525187390825,0.080468712930068,"Kerguelen",1.0005,"F"
"ct109-965-14.ct109-965-14.7012","ct109-965-14",2015-03-13 14:18:30,47.25,102.240844181878,-60.8518669600809,0,-17.0713302961346,0.0811884429478688,"Kerguelen",1.0005,"F"
"ct109-965-14.ct109-965-14.7013","ct109-965-14",2015-03-13 20:18:30,47.5,102.423767008175,-60.8208519141724,0,-16.9893951943502,0.0819351017844056,"Kerguelen",1,"F"
"ct109-965-14.ct109-965-14.7014","ct109-965-14",2015-03-14 02:18:30,47.75,102.628527936968,-60.7813388494476,0,-16.9066859882712,0.0827092060789569,"Kerguelen",1,"F"
"ct109-965-14.ct109-965-14.7015","ct109-965-14",2015-03-14 08:18:30,48,102.92923421721,-60.7586390134122,0,-16.8231746914292,0.0835112968420343,"Kerguelen",1,"F"
"ct109-965-14.ct109-965-14.7016","ct109-965-14",2015-03-14 14:18:30,48.25,103.227894462681,-60.6966392609575,0,-16.7388327504513,0.0843419409779084,"Kerguelen",1,"F"
"ct109-965-14.ct109-965-14.7017","ct109-965-14",2015-03-14 20:18:30,48.5,103.526228296737,-60.679342909518,0,-16.6536310175385,0.0852017329127736,"Kerguelen",1.00025,"F"
"ct109-965-14.ct109-965-14.7018","ct109-965-14",2015-03-15 02:18:30,48.75,103.739427127136,-60.6352344211475,0,-16.5675397211921,0.0860912963463939,"Kerguelen",1.002,"F"
"ct109-965-14.ct109-965-14.7019","ct109-965-14",2015-03-15 08:18:30,49,103.869220319524,-60.5769191158602,0,-16.4805284024056,0.0870113187865285,"Kerguelen",1.001,"F"
"ct109-965-14.ct109-965-14.7020","ct109-965-14",2015-03-15 14:18:30,49.25,103.980044762475,-60.5807985816443,0,-16.3925641358373,0.0879642665682967,"Kerguelen",1.00075,"F"
"ct109-965-14.ct109-965-14.7021","ct109-965-14",2015-03-15 20:18:30,49.5,104.287559754247,-60.5678398450137,0,-16.303610580925,0.0889535549122938,"Kerguelen",1,"F"
"ct109-965-14.ct109-965-14.7022","ct109-965-14",2015-03-16 02:18:30,49.75,104.683604059396,-60.5407167394954,0,-16.2136305406644,0.0899800402605927,"Kerguelen",1,"F"
"ct109-965-14.ct109-965-14.7023","ct109-965-14",2015-03-16 08:18:30,50,104.959834341819,-60.4563294800271,0,-16.1225932157752,0.0910373248891982,"Kerguelen",1.00775,"F"
"ct109-965-14.ct109-965-14.7024","ct109-965-14",2015-03-16 14:18:30,50.25,105.031166011911,-60.4142603906372,0,-16.0304737449254,0.0921194708497886,"Kerguelen",1.005,"F"
"ct109-965-14.ct109-965-14.7025","ct109-965-14",2015-03-16 20:18:30,50.5,105.135979627103,-60.388851633533,0,-15.9372467503213,0.0932269946041231,"Kerguelen",1.00225,"F"
"ct109-965-14.ct109-965-14.7026","ct109-965-14",2015-03-17 02:18:30,50.75,105.230085684962,-60.332551129317,0,-15.8428860887825,0.0943606615388337,"Kerguelen",1.003,"F"
"ct109-965-14.ct109-965-14.7027","ct109-965-14",2015-03-17 08:18:30,51,105.322612586739,-60.2646030569616,0,-15.747365003042,0.095521085740502,"Kerguelen",1.00225,"F"
"ct109-965-14.ct109-965-14.7028","ct109-965-14",2015-03-17 14:18:30,51.25,105.445570811774,-60.2330062598927,0,-15.6506622659089,0.0967027371330559,"Kerguelen",1.00025,"F"
"ct109-965-14.ct109-965-14.7029","ct109-965-14",2015-03-17 20:18:30,51.5,105.553749663085,-60.2000945238317,0,-15.5527666407615,0.0978956251474067,"Kerguelen",1,"F"
"ct109-965-14.ct109-965-14.7030","ct109-965-14",2015-03-18 02:18:30,51.75,105.633539322869,-60.1452226790892,0,-15.4536678642635,0.0990987764979828,"Kerguelen",1,"F"
"ct109-965-14.ct109-965-14.7031","ct109-965-14",2015-03-18 08:18:30,52,105.782190992722,-60.0358885664672,0,-15.3533550734948,0.100312790768764,"Kerguelen",1.0035,"F"
"ct109-965-14.ct109-965-14.7032","ct109-965-14",2015-03-18 14:18:30,52.25,105.847741382118,-60.0001972090736,0,-15.2518167770319,0.10153829646288,"Kerguelen",1.0015,"F"
"ct109-965-14.ct109-965-14.7033","ct109-965-14",2015-03-18 20:18:30,52.5,105.997220522607,-59.9762841924012,0,-15.1490408240911,0.102775952940751,"Kerguelen",1.00125,"F"
"ct109-965-14.ct109-965-14.7034","ct109-965-14",2015-03-19 02:18:30,52.75,106.161152694255,-59.910389029464,0,-15.045014371552,0.104026452539149,"Kerguelen",1.0025,"F"
"ct109-965-14.ct109-965-14.7035","ct109-965-14",2015-03-19 08:18:30,53,106.474631975232,-59.7669561162058,0,-14.9397238487012,0.105290522850784,"Kerguelen",1.902,"F"
"ct109-965-14.ct109-965-14.7036","ct109-965-14",2015-03-19 14:18:30,53.25,106.431380701914,-59.7534029719294,0,-14.8331549194925,0.106568929208695,"Kerguelen",1.82525,"F"
"ct109-965-14.ct109-965-14.7037","ct109-965-14",2015-03-19 20:18:30,53.5,106.460443232554,-59.7060762371561,0,-14.7252924421133,0.107862477379181,"Kerguelen",1.7345,"F"
"ct109-965-14.ct109-965-14.7038","ct109-965-14",2015-03-20 02:18:30,53.75,106.558165399056,-59.6901580298106,0,-14.6161204256132,0.109172016500109,"Kerguelen",1.661,"F"
"ct109-965-14.ct109-965-14.7039","ct109-965-14",2015-03-20 08:18:30,54,106.636472214576,-59.6306525736343,0,-14.5056232815254,0.110497144087801,"Kerguelen",1.6245,"F"
"ct109-965-14.ct109-965-14.7040","ct109-965-14",2015-03-20 14:18:30,54.25,106.643407560978,-59.6044813015303,0,-14.3937934563651,0.111829825160323,"Kerguelen",1.5815,"F"
"ct109-965-14.ct109-965-14.7041","ct109-965-14",2015-03-20 20:18:30,54.5,106.650314293205,-59.6376472574241,0,-14.2806276446321,0.113165811732996,"Kerguelen",1.498,"F"
"ct109-965-14.ct109-965-14.7042","ct109-965-14",2015-03-21 02:18:30,54.75,106.889340086546,-59.6186031465593,0,-14.1661220529116,0.114505591720496,"Kerguelen",1.381,"F"
"ct109-965-14.ct109-965-14.7043","ct109-965-14",2015-03-21 08:18:30,55,107.028224884949,-59.5599564777317,0,-14.050272213303,0.115849839608576,"Kerguelen",1.354,"F"
"ct109-965-14.ct109-965-14.7044","ct109-965-14",2015-03-21 14:18:30,55.25,107.058626162028,-59.5418913440716,0,-13.9330731220759,0.117199091227094,"Kerguelen",1.28725,"F"
"ct109-965-14.ct109-965-14.7045","ct109-965-14",2015-03-21 20:18:30,55.5,107.11942906913,-59.5342615348291,0,-13.8145202711932,0.118552850882714,"Kerguelen",1.22075,"F"
"ct109-965-14.ct109-965-14.7046","ct109-965-14",2015-03-22 02:18:30,55.75,107.135959299049,-59.515870885436,0,-13.6946089523691,0.11991131882412,"Kerguelen",1.15075,"F"
"ct109-965-14.ct109-965-14.7047","ct109-965-14",2015-03-22 08:18:30,56,107.162810295925,-59.4871868905426,0,-13.5733336965153,0.121275255853814,"Kerguelen",1.09,"F"
"ct109-965-14.ct109-965-14.7048","ct109-965-14",2015-03-22 14:18:30,56.25,107.295400543902,-59.461968563132,0,-13.4506882316532,0.122645464862101,"Kerguelen",1.04975,"F"
"ct109-965-14.ct109-965-14.7049","ct109-965-14",2015-03-22 20:18:30,56.5,107.408336752932,-59.3717695511593,0,-13.3266654397106,0.124022791942577,"Kerguelen",1.044,"F"
"ct109-965-14.ct109-965-14.7050","ct109-965-14",2015-03-23 02:18:30,56.75,107.602323461066,-59.3264959009173,0,-13.201257309702,0.125408130008606,"Kerguelen",1.05975,"F"
"ct109-965-14.ct109-965-14.7051","ct109-965-14",2015-03-23 08:18:30,57,107.807670997531,-59.28911865007,0,-13.0744548869452,0.1268024227568,"Kerguelen",1.1315,"F"
"ct109-965-14.ct109-965-14.7052","ct109-965-14",2015-03-23 14:18:30,57.25,107.954846955738,-59.2618099764952,0,-12.9462491886831,0.128205698262085,"Kerguelen",1.3725,"F"
"ct109-965-14.ct109-965-14.7053","ct109-965-14",2015-03-23 20:18:30,57.5,107.962213992108,-59.2289430273477,0,-12.8166348922993,0.129614296383807,"Kerguelen",1.489,"F"
"ct109-965-14.ct109-965-14.7054","ct109-965-14",2015-03-24 02:18:30,57.75,107.970649193279,-59.2175486557571,0,-12.6856071619288,0.131027730370475,"Kerguelen",1.6165,"F"
"ct109-965-14.ct109-965-14.7055","ct109-965-14",2015-03-24 08:18:30,58,108.047127861959,-59.2466441024219,0,-12.5531617767327,0.132445385196073,"Kerguelen",1.7155,"F"
"ct109-965-14.ct109-965-14.7056","ct109-965-14",2015-03-24 14:18:30,58.25,108.038128845358,-59.224008313787,0,-12.4193104801473,0.133851296585397,"Kerguelen",1.76525,"F"
"ct109-965-14.ct109-965-14.7057","ct109-965-14",2015-03-24 20:18:30,58.5,108.04724097083,-59.2316064087547,0,-12.2840805773449,0.135229902802433,"Kerguelen",1.80625,"F"
"ct109-965-14.ct109-965-14.7058","ct109-965-14",2015-03-25 02:18:30,58.75,108.110271669443,-59.2587628186181,0,-12.1475026038315,0.136577973513401,"Kerguelen",1.85125,"F"
"ct109-965-14.ct109-965-14.7059","ct109-965-14",2015-03-25 08:18:30,59,108.102583718966,-59.2913229893423,0,-12.0096020044002,0.137900599431341,"Kerguelen",1.8905,"F"
"ct109-965-14.ct109-965-14.7060","ct109-965-14",2015-03-25 14:18:30,59.25,108.071126095496,-59.2634844371495,0,-11.8704127813913,0.139189223008865,"Kerguelen",1.913,"F"
"ct109-965-14.ct109-965-14.7061","ct109-965-14",2015-03-25 20:18:30,59.5,108.181221847984,-59.2719018231674,0,-11.7299834749468,0.140429306444508,"Kerguelen",1.92225,"F"
"ct109-965-14.ct109-965-14.7062","ct109-965-14",2015-03-26 02:18:30,59.75,108.288955610974,-59.2866835810825,0,-11.5883634087385,0.141620066208316,"Kerguelen",1.9465,"F"
"ct109-965-14.ct109-965-14.7063","ct109-965-14",2015-03-26 08:18:30,60,108.300182093682,-59.316526270595,0,-11.4456010415788,0.142762367159735,"Kerguelen",1.96525,"F"
"ct109-968-14.ct109-968-14.7595","ct109-968-14",2014-12-27 00:45:01,0.25,72.7573008271413,-51.6540784301167,0,-32.6858477343031,-0.0553873503047531,"Kerguelen",1,"M"
"ct109-968-14.ct109-968-14.7596","ct109-968-14",2014-12-27 06:45:01,0.5,73.1078012596084,-51.7749502731679,0,-32.7412449494242,-0.0553972151211057,"Kerguelen",1,"M"
"ct109-968-14.ct109-968-14.7597","ct109-968-14",2014-12-27 12:45:01,0.75,73.3856720069326,-51.8903312461975,0,-32.7966514252532,-0.0554064758289285,"Kerguelen",1,"M"
"ct109-968-14.ct109-968-14.7598","ct109-968-14",2014-12-27 18:45:01,1,73.5710101440316,-52.0378854935551,0,-32.8520665567467,-0.0554151314935858,"Kerguelen",1,"M"
"ct109-968-14.ct109-968-14.7599","ct109-968-14",2014-12-28 00:45:01,1.25,73.8437961785704,-52.2478013328175,0,-32.9074897378809,-0.0554231811341455,"Kerguelen",1,"M"
"ct109-968-14.ct109-968-14.7600","ct109-968-14",2014-12-28 06:45:01,1.5,74.1222177516932,-52.4397472386958,0,-32.9629203616038,-0.0554306237229463,"Kerguelen",1,"M"
"ct109-968-14.ct109-968-14.7601","ct109-968-14",2014-12-28 12:45:01,1.75,74.3325612218291,-52.6468201320483,0,-33.0183578197953,-0.055437458191443,"Kerguelen",1,"M"
"ct109-968-14.ct109-968-14.7602","ct109-968-14",2014-12-28 18:45:01,2,74.4801977745106,-52.8705164116731,0,-33.0738015032193,-0.0554436834240446,"Kerguelen",1,"M"
"ct109-968-14.ct109-968-14.7603","ct109-968-14",2014-12-29 00:45:01,2.25,74.5639414636047,-53.0955463717223,0,-33.1292508014787,-0.0554492982593968,"Kerguelen",1,"M"
"ct109-968-14.ct109-968-14.7604","ct109-968-14",2014-12-29 06:45:01,2.5,74.8022733972923,-53.3480140058711,0,-33.1847051029736,-0.0554543014948505,"Kerguelen",1,"M"
"ct109-968-14.ct109-968-14.7605","ct109-968-14",2014-12-29 12:45:01,2.75,74.8783595856637,-53.5367824244803,0,-33.2401637948525,-0.0554586918789512,"Kerguelen",1,"M"
"ct109-968-14.ct109-968-14.7606","ct109-968-14",2014-12-29 18:45:01,3,75.0677672542992,-53.7100307497801,0,-33.2956261538278,-0.0554623589752723,"Kerguelen",1,"M"
"ct109-968-14.ct109-968-14.7607","ct109-968-14",2014-12-30 00:45:01,3.25,75.3192710958547,-53.9211673378714,0,-33.3510865252108,-0.0554603713830426,"Kerguelen",1,"M"
"ct109-968-14.ct109-968-14.7608","ct109-968-14",2014-12-30 06:45:01,3.5,75.5122952791646,-54.137518202278,0,-33.406530240281,-0.0554437150701137,"Kerguelen",1,"M"
"ct109-968-14.ct109-968-14.7609","ct109-968-14",2014-12-30 12:45:01,3.75,75.7308598281956,-54.3479093428188,0,-33.4619411721448,-0.0554109318638085,"Kerguelen",1,"M"
"ct109-968-14.ct109-968-14.7610","ct109-968-14",2014-12-30 18:45:01,4,75.9724932140559,-54.5338906074277,0,-33.5173031606009,-0.0553619884561207,"Kerguelen",1,"M"
"ct109-968-14.ct109-968-14.7611","ct109-968-14",2014-12-31 00:45:01,4.25,76.1348673923347,-54.67155473197,0,-33.5725982529871,-0.0552950923862594,"Kerguelen",1,"M"
"ct109-968-14.ct109-968-14.7612","ct109-968-14",2014-12-31 06:45:01,4.5,76.3001389647398,-54.8132860298498,0,-33.6278048977181,-0.055206644730954,"Kerguelen",1,"M"
"ct109-968-14.ct109-968-14.7613","ct109-968-14",2014-12-31 12:45:01,4.75,76.682399353675,-54.9858035563658,0,-33.6829010830832,-0.0550961853650889,"Kerguelen",1,"M"
"ct109-968-14.ct109-968-14.7614","ct109-968-14",2014-12-31 18:45:01,5,77.037698962742,-55.1885912945755,0,-33.7378647655965,-0.0549636825133315,"Kerguelen",1,"M"
"ct109-968-14.ct109-968-14.7615","ct109-968-14",2015-01-01 00:45:01,5.25,77.3414475215789,-55.4089647174064,0,-33.7926738688143,-0.0548091032178288,"Kerguelen",1,"M"
"ct109-968-14.ct109-968-14.7616","ct109-968-14",2015-01-01 06:45:01,5.5,77.6139319741173,-55.5959790366981,0,-33.8473062821916,-0.0546324133772369,"Kerguelen",1,"M"
"ct109-968-14.ct109-968-14.7617","ct109-968-14",2015-01-01 12:45:01,5.75,78.078256023842,-55.753045547399,0,-33.9017398599999,-0.0544335778083216,"Kerguelen",1,"M"
"ct109-968-14.ct109-968-14.7618","ct109-968-14",2015-01-01 18:45:01,6,78.5285403964641,-55.8861455574688,0,-33.9559524202958,-0.0542125602958743,"Kerguelen",1,"M"
"ct109-968-14.ct109-968-14.7619","ct109-968-14",2015-01-02 00:45:01,6.25,78.8776518516854,-56.0384082525813,0,-34.009921743948,-0.0539693236522421,"Kerguelen",1,"M"
"ct109-968-14.ct109-968-14.7620","ct109-968-14",2015-01-02 06:45:01,6.5,79.0800792095339,-56.1901301629582,0,-34.0636255737342,-0.0537038297861336,"Kerguelen",1,"M"
"ct109-968-14.ct109-968-14.7621","ct109-968-14",2015-01-02 12:45:01,6.75,79.3333156930335,-56.3989272899193,0,-34.1170416134977,-0.053416039763543,"Kerguelen",1,"M"
"ct109-968-14.ct109-968-14.7622","ct109-968-14",2015-01-02 18:45:01,7,79.5643002758101,-56.6433906428369,0,-34.1701475273761,-0.0531059138783874,"Kerguelen",1,"M"
"ct109-968-14.ct109-968-14.7623","ct109-968-14",2015-01-03 00:45:01,7.25,79.7146248753689,-56.8848538202946,0,-34.2229209391081,-0.05277341173206,"Kerguelen",1,"M"
"ct109-968-14.ct109-968-14.7624","ct109-968-14",2015-01-03 06:45:01,7.5,79.807671857105,-57.03677320661,0,-34.2753394314095,-0.0524184923013482,"Kerguelen",1,"M"
"ct109-968-14.ct109-968-14.7625","ct109-968-14",2015-01-03 12:45:01,7.75,80.0682819664911,-57.1930108622951,0,-34.3273805454375,-0.0520411140279731,"Kerguelen",1,"M"
"ct109-968-14.ct109-968-14.7626","ct109-968-14",2015-01-03 18:45:01,8,80.3053548725389,-57.3654294086758,0,-34.3790218090016,-0.0516412635641117,"Kerguelen",1,"M"
"ct109-968-14.ct109-968-14.7627","ct109-968-14",2015-01-04 00:45:01,8.25,80.5318204191041,-57.5544492688953,0,-34.430241381587,-0.0512195725853926,"Kerguelen",1,"M"
"ct109-968-14.ct109-968-14.7628","ct109-968-14",2015-01-04 06:45:01,8.5,80.8245226304081,-57.7856623331476,0,-34.4810180634281,-0.0507766818411359,"Kerguelen",1,"M"
"ct109-968-14.ct109-968-14.7629","ct109-968-14",2015-01-04 12:45:01,8.75,81.0632768366856,-58.0076796325688,0,-34.5313306442852,-0.050312580857087,"Kerguelen",1,"M"
"ct109-968-14.ct109-968-14.7630","ct109-968-14",2015-01-04 18:45:01,9,81.2614483008102,-58.2261879343042,0,-34.5811578730922,-0.0498272288070423,"Kerguelen",1,"M"
"ct109-968-14.ct109-968-14.7631","ct109-968-14",2015-01-05 00:45:01,9.25,81.3672521332222,-58.4463696396828,0,-34.6304784579782,-0.0493205848859757,"Kerguelen",1,"M"
"ct109-968-14.ct109-968-14.7632","ct109-968-14",2015-01-05 06:45:01,9.5,81.4684998884212,-58.5941382148788,0,-34.6792710663748,-0.0487926083965418,"Kerguelen",1,"M"
"ct109-968-14.ct109-968-14.7633","ct109-968-14",2015-01-05 12:45:01,9.75,81.7434877227703,-58.7721987479691,0,-34.7275143252175,-0.0482432588427451,"Kerguelen",1,"M"
"ct109-968-14.ct109-968-14.7634","ct109-968-14",2015-01-05 18:45:01,10,81.9140212952917,-59.010601972998,0,-34.7751868212494,-0.0476724960319364,"Kerguelen",1,"M"
"ct109-968-14.ct109-968-14.7635","ct109-968-14",2015-01-06 00:45:01,10.25,82.031607173699,-59.2268025906298,0,-34.8222671014137,-0.0470802801642634,"Kerguelen",1,"M"
"ct109-968-14.ct109-968-14.7636","ct109-968-14",2015-01-06 06:45:01,10.5,82.3368189963529,-59.4779974120593,0,-34.8687336733547,-0.0464665719410451,"Kerguelen",1,"M"
"ct109-968-14.ct109-968-14.7637","ct109-968-14",2015-01-06 12:45:01,10.75,82.733950489392,-59.7198858466855,0,-34.9145650060149,-0.0458313326601179,"Kerguelen",1,"M"
"ct109-968-14.ct109-968-14.7638","ct109-968-14",2015-01-06 18:45:01,11,82.9915686674818,-59.9267645116866,0,-34.9597395303347,-0.0451745243198187,"Kerguelen",1,"M"
"ct109-968-14.ct109-968-14.7639","ct109-968-14",2015-01-07 00:45:01,11.25,83.2139699117161,-60.1546640245125,0,-35.0042356400624,-0.0444961097276986,"Kerguelen",1,"M"
"ct109-968-14.ct109-968-14.7640","ct109-968-14",2015-01-07 06:45:01,11.5,83.4782140691984,-60.3696439432553,0,-35.048031692664,-0.0437960526016135,"Kerguelen",1,"M"
"ct109-968-14.ct109-968-14.7641","ct109-968-14",2015-01-07 12:45:01,11.75,83.7728298462442,-60.576951981947,0,-35.0911060103403,-0.0430743176762949,"Kerguelen",1,"M"
"ct109-968-14.ct109-968-14.7642","ct109-968-14",2015-01-07 18:45:01,12,84.0916543741735,-60.7794923628865,0,-35.1334368811573,-0.04233087081702,"Kerguelen",1,"M"
"ct109-968-14.ct109-968-14.7643","ct109-968-14",2015-01-08 00:45:01,12.25,84.2558091714452,-61.0082001198388,0,-35.1750025602763,-0.0415656791190377,"Kerguelen",1,"M"
"ct109-968-14.ct109-968-14.7644","ct109-968-14",2015-01-08 06:45:01,12.5,84.4325091889419,-61.2912465480979,0,-35.2157812713021,-0.0407787110257685,"Kerguelen",1,"M"
"ct109-968-14.ct109-968-14.7645","ct109-968-14",2015-01-08 12:45:01,12.75,84.6343919240014,-61.5652108299922,0,-35.2557512077337,-0.0399699364315942,"Kerguelen",1,"M"
"ct109-968-14.ct109-968-14.7646","ct109-968-14",2015-01-08 18:45:01,13,84.9492419958168,-61.7832931096297,0,-35.2948905345261,-0.0391393267923756,"Kerguelen",1,"M"
"ct109-968-14.ct109-968-14.7647","ct109-968-14",2015-01-09 00:45:01,13.25,85.2368536305856,-61.9338884445144,0,-35.3331773897649,-0.0382868552387894,"Kerguelen",1,"M"
"ct109-968-14.ct109-968-14.7648","ct109-968-14",2015-01-09 06:45:01,13.5,85.6359529701311,-62.0576561435937,0,-35.3705898864465,-0.037412496681577,"Kerguelen",1,"M"
"ct109-968-14.ct109-968-14.7649","ct109-968-14",2015-01-09 12:45:01,13.75,85.9606525050133,-62.2561641650462,0,-35.4071061143651,-0.0365162279186593,"Kerguelen",1,"M"
"ct109-968-14.ct109-968-14.7650","ct109-968-14",2015-01-09 18:45:01,14,86.1384034382556,-62.4357166267231,0,-35.4427041421148,-0.0355980277496448,"Kerguelen",1,"M"
"ct109-968-14.ct109-968-14.7651","ct109-968-14",2015-01-10 00:45:01,14.25,86.2887123780554,-62.6116503842455,0,-35.4773620191911,-0.034657877076355,"Kerguelen",1,"M"
"ct109-968-14.ct109-968-14.7652","ct109-968-14",2015-01-10 06:45:01,14.5,86.6371711548931,-62.7662553050984,0,-35.5110577782,-0.0336957590089226,"Kerguelen",1,"M"
"ct109-968-14.ct109-968-14.7653","ct109-968-14",2015-01-10 12:45:01,14.75,87.0403288863508,-62.9671714053846,0,-35.5437694371751,-0.0327116589750598,"Kerguelen",1,"M"
"ct109-968-14.ct109-968-14.7654","ct109-968-14",2015-01-10 18:45:01,15,87.4647524782475,-63.1370107651547,0,-35.5754750019895,-0.0317055648144438,"Kerguelen",1,"M"
"ct109-968-14.ct109-968-14.7655","ct109-968-14",2015-01-11 00:45:01,15.25,87.9119910021319,-63.3944362867776,0,-35.6061524688764,-0.0306774668868692,"Kerguelen",1,"M"
"ct109-968-14.ct109-968-14.7656","ct109-968-14",2015-01-11 06:45:01,15.5,88.3770105187556,-63.6728587204133,0,-35.6357798270407,-0.0296273581642525,"Kerguelen",1.0015,"M"
"ct109-968-14.ct109-968-14.7657","ct109-968-14",2015-01-11 12:45:01,15.75,88.6227588470914,-63.8262347558251,0,-35.6643351860685,-0.0285553590278098,"Kerguelen",1,"M"
"ct109-968-14.ct109-968-14.7658","ct109-968-14",2015-01-11 18:45:01,16,88.8144389445551,-64.0107030994131,0,-35.6917998599963,-0.0274646739277906,"Kerguelen",1,"M"
"ct109-968-14.ct109-968-14.7659","ct109-968-14",2015-01-12 00:45:01,16.25,89.1933386076478,-64.2037938173839,0,-35.7181585734917,-0.0263587134954613,"Kerguelen",1,"M"
"ct109-968-14.ct109-968-14.7660","ct109-968-14",2015-01-12 06:45:01,16.5,89.6036146423605,-64.4784124062077,0,-35.7433962266648,-0.025237653173088,"Kerguelen",1,"M"
"ct109-968-14.ct109-968-14.7661","ct109-968-14",2015-01-12 12:45:01,16.75,89.9177785860483,-64.6660083695994,0,-35.7674977329027,-0.0241015062379391,"Kerguelen",1,"M"
"ct109-968-14.ct109-968-14.7662","ct109-968-14",2015-01-12 18:45:01,17,90.2434466866417,-64.8106899066635,0,-35.790448021256,-0.0229502883532295,"Kerguelen",1.01375,"M"
"ct109-968-14.ct109-968-14.7663","ct109-968-14",2015-01-13 00:45:01,17.25,90.3816963322437,-64.8586501447791,0,-35.8122320388494,-0.0217840175934292,"Kerguelen",1.00575,"M"
"ct109-968-14.ct109-968-14.7664","ct109-968-14",2015-01-13 06:45:01,17.5,90.5413125502533,-64.9142446292512,0,-35.8328347533226,-0.0206027144732002,"Kerguelen",1,"M"
"ct109-968-14.ct109-968-14.7665","ct109-968-14",2015-01-13 12:45:01,17.75,90.9230823953301,-65.049480076814,0,-35.8522411552801,-0.0194064019575002,"Kerguelen",1,"M"
"ct109-968-14.ct109-968-14.7666","ct109-968-14",2015-01-13 18:45:01,18,91.3617668276092,-65.2289988074877,0,-35.8704362607649,-0.0181951054848251,"Kerguelen",1,"M"
"ct109-968-14.ct109-968-14.7667","ct109-968-14",2015-01-14 00:45:01,18.25,91.7060161693585,-65.3502701065647,1,-35.8874051137377,-0.0169688529727874,"Kerguelen",1,"M"
"ct109-968-14.ct109-968-14.7668","ct109-968-14",2015-01-14 06:45:01,18.5,92.0641361420807,-65.503079804271,1,-35.9031327885627,-0.0157276748250224,"Kerguelen",1,"M"
"ct109-968-14.ct109-968-14.7669","ct109-968-14",2015-01-14 12:45:01,18.75,92.4009601635061,-65.6606583444818,1,-35.917604392501,-0.0144716039382597,"Kerguelen",1,"M"
"ct109-968-14.ct109-968-14.7670","ct109-968-14",2015-01-14 18:45:01,19,92.8278122341272,-65.792646886612,1,-35.9308050681969,-0.0132006756959457,"Kerguelen",1,"M"
"ct109-968-14.ct109-968-14.7671","ct109-968-14",2015-01-15 00:45:01,19.25,93.1061721837169,-65.8522142185712,1,-35.9427199961579,-0.0119149279609654,"Kerguelen",1,"M"
"ct109-968-14.ct109-968-14.7672","ct109-968-14",2015-01-15 06:45:01,19.5,93.3548447548642,-65.9770973022815,1,-35.9533343972284,-0.0106144010705356,"Kerguelen",1.00025,"M"
"ct109-968-14.ct109-968-14.7673","ct109-968-14",2015-01-15 12:45:01,19.75,93.6014486297583,-66.0372986000492,1,-35.9626335350391,-0.00929913781062552,"Kerguelen",1.00075,"M"
"ct109-968-14.ct109-968-14.7674","ct109-968-14",2015-01-15 18:45:01,20,93.6994078660707,-66.0922312618165,1,-35.9706027184427,-0.00796918340361108,"Kerguelen",1.001,"M"
"ct109-968-14.ct109-968-14.7675","ct109-968-14",2015-01-16 00:45:01,20.25,93.6613843611918,-66.1933357962612,1,-35.9772273039183,-0.00662458547556755,"Kerguelen",1.00025,"M"
"ct109-968-14.ct109-968-14.7676","ct109-968-14",2015-01-16 06:45:01,20.5,93.8740661756254,-66.3468467177793,1,-35.9824926979423,-0.00526539402402326,"Kerguelen",1,"M"
"ct109-968-14.ct109-968-14.7677","ct109-968-14",2015-01-16 12:45:01,20.75,94.2198025196761,-66.4301652889181,1,-35.9863843593281,-0.0038916613858575,"Kerguelen",1,"M"
"ct109-968-14.ct109-968-14.7678","ct109-968-14",2015-01-16 18:45:01,21,94.5268572488106,-66.5015276996353,1,-35.9888878015161,-0.00250344218798437,"Kerguelen",1.005,"M"
"ct109-968-14.ct109-968-14.7679","ct109-968-14",2015-01-17 00:45:01,21.25,94.7718164078193,-66.3958252566029,1,-35.9899885948152,-0.00110079329913026,"Kerguelen",1.00075,"M"
"ct109-968-14.ct109-968-14.7680","ct109-968-14",2015-01-17 06:45:01,21.5,94.8133679462711,-66.3047380108765,1,-35.9896723685938,0.000316226221436233,"Kerguelen",1.00025,"M"
"ct109-968-14.ct109-968-14.7681","ct109-968-14",2015-01-17 12:45:01,21.75,94.7694456501357,-66.1541410660926,1,-35.9879248134046,0.0017475551891688,"Kerguelen",1.002,"M"
"ct109-968-14.ct109-968-14.7682","ct109-968-14",2015-01-17 18:45:01,22,94.9865403054075,-66.0720827283426,1,-35.9847348593924,0.00318995401220046,"Kerguelen",1.00125,"M"
"ct109-968-14.ct109-968-14.7683","ct109-968-14",2015-01-18 00:45:01,22.25,95.2785730276961,-66.0331056327143,1,-35.9801067238202,0.00462813557224884,"Kerguelen",1.031,"M"
"ct109-968-14.ct109-968-14.7684","ct109-968-14",2015-01-18 06:45:01,22.5,95.4017160708882,-65.95479389797,1,-35.9740492409522,0.00605748286798824,"Kerguelen",1.02925,"M"
"ct109-968-14.ct109-968-14.7685","ct109-968-14",2015-01-18 12:45:01,22.75,95.3359004229081,-65.9092690426895,1,-35.966571305895,0.00747793505718741,"Kerguelen",1.01575,"M"
"ct109-968-14.ct109-968-14.7686","ct109-968-14",2015-01-18 18:45:01,23,95.3405400463842,-65.8266280379202,1,-35.9576818721325,0.00888943376249896,"Kerguelen",1.00775,"M"
"ct109-968-14.ct109-968-14.7687","ct109-968-14",2015-01-19 00:45:01,23.25,95.2686900644454,-65.7621643034549,1,-35.9473899498209,0.010291922311656,"Kerguelen",1.0035,"M"
"ct109-968-14.ct109-968-14.7688","ct109-968-14",2015-01-19 06:45:01,23.5,95.3180502810965,-65.7063262173585,1,-35.9357046040213,0.011685345799517,"Kerguelen",1.00025,"M"
"ct109-968-14.ct109-968-14.7689","ct109-968-14",2015-01-19 12:45:01,23.75,95.4510472569751,-65.5865104955139,1,-35.9226349528637,0.0130696511576656,"Kerguelen",1,"M"
"ct109-968-14.ct109-968-14.7690","ct109-968-14",2015-01-19 18:45:01,24,95.5274653290533,-65.4672051994871,1,-35.9081901656487,0.0144447872149789,"Kerguelen",1.001,"M"
"ct109-968-14.ct109-968-14.7691","ct109-968-14",2015-01-20 00:45:01,24.25,95.5570263144222,-65.38215800077,1,-35.8923794609004,0.0158107047483369,"Kerguelen",1.00075,"M"
"ct109-968-14.ct109-968-14.7692","ct109-968-14",2015-01-20 06:45:01,24.5,95.4660522323443,-65.2763154315953,1,-35.8752121043597,0.0171673565406705,"Kerguelen",1.00075,"M"
"ct109-968-14.ct109-968-14.7693","ct109-968-14",2015-01-20 12:45:01,24.75,95.2731203000061,-65.2106535534107,1,-35.8566974069296,0.0185146974301387,"Kerguelen",1.00525,"M"
"ct109-968-14.ct109-968-14.7694","ct109-968-14",2015-01-20 18:45:01,25,94.9547828107662,-65.1736683147507,1,-35.8368447225799,0.0198526843497027,"Kerguelen",1.31375,"M"
"ct109-968-14.ct109-968-14.7695","ct109-968-14",2015-01-21 00:45:01,25.25,94.7393177378618,-65.2154863543752,1,-35.8156634462026,0.021181276377219,"Kerguelen",1.915,"M"
"ct109-968-14.ct109-968-14.7696","ct109-968-14",2015-01-21 06:45:01,25.5,94.8462869415662,-65.2944625983402,1,-35.7931630114372,0.0225004347653934,"Kerguelen",1.96125,"M"
"ct109-968-14.ct109-968-14.7697","ct109-968-14",2015-01-21 12:45:01,25.75,94.8744562556616,-65.2994122151683,1,-35.769353250496,0.0238097609412069,"Kerguelen",1.979,"M"
"ct109-968-14.ct109-968-14.7698","ct109-968-14",2015-01-21 18:45:01,26,94.6777638606081,-65.3589523034529,1,-35.7442483079799,0.025104942516152,"Kerguelen",1.98925,"M"
"ct109-968-14.ct109-968-14.7699","ct109-968-14",2015-01-22 00:45:01,26.25,94.6899177021066,-65.3638293027101,1,-35.7178651492844,0.0263831586955143,"Kerguelen",1.99125,"M"
"ct109-968-14.ct109-968-14.7700","ct109-968-14",2015-01-22 06:45:01,26.5,94.7044973293136,-65.3644304480232,1,-35.6902208093541,0.0276443399302828,"Kerguelen",1.9895,"M"
"ct109-968-14.ct109-968-14.7701","ct109-968-14",2015-01-22 12:45:01,26.75,94.8017119780878,-65.417888625724,1,-35.6613323414478,0.0288884679063017,"Kerguelen",1.98975,"M"
"ct109-968-14.ct109-968-14.7702","ct109-968-14",2015-01-22 18:45:01,27,94.9499033880459,-65.4054423743175,1,-35.631216814088,0.0301155273597697,"Kerguelen",1.994,"M"
"ct109-968-14.ct109-968-14.7703","ct109-968-14",2015-01-23 00:45:01,27.25,94.9704555043339,-65.4041578258537,1,-35.5998913080401,0.0313255060479301,"Kerguelen",1.9925,"M"
"ct109-968-14.ct109-968-14.7704","ct109-968-14",2015-01-23 06:45:01,27.5,94.9754069425073,-65.3636360997548,1,-35.5673729133431,0.032518394697012,"Kerguelen",1.99275,"M"
"ct109-968-14.ct109-968-14.7705","ct109-968-14",2015-01-23 12:45:01,27.75,94.9760749114419,-65.3647738181186,1,-35.5336787263817,0.0336941869614027,"Kerguelen",1.99475,"M"
"ct109-968-14.ct109-968-14.7706","ct109-968-14",2015-01-23 18:45:01,28,95.0537126876944,-65.3436797613594,1,-35.4988258470096,0.0348528793720437,"Kerguelen",1.99725,"M"
"ct109-968-14.ct109-968-14.7707","ct109-968-14",2015-01-24 00:45:01,28.25,94.9928388072192,-65.3763483186031,1,-35.4628313757327,0.0359944712768789,"Kerguelen",1.99675,"M"
"ct109-968-14.ct109-968-14.7708","ct109-968-14",2015-01-24 06:45:01,28.5,95.1737481181038,-65.3583740959722,1,-35.4257124109455,0.0371189647872194,"Kerguelen",1.996,"M"
"ct109-968-14.ct109-968-14.7709","ct109-968-14",2015-01-24 12:45:01,28.75,95.1657840665193,-65.4297408401395,1,-35.3874857764003,0.038226634545202,"Kerguelen",1.987,"M"
"ct109-968-14.ct109-968-14.7710","ct109-968-14",2015-01-24 18:45:01,29,95.0722207939674,-65.5051361872742,1,-35.3481646275331,0.0393211488672662,"Kerguelen",1.98375,"M"
"ct109-968-14.ct109-968-14.7711","ct109-968-14",2015-01-25 00:45:01,29.25,95.0102960318742,-65.4994383560754,1,-35.3077594781209,0.0404051494121815,"Kerguelen",1.975,"M"
"ct109-968-14.ct109-968-14.7712","ct109-968-14",2015-01-25 06:45:01,29.5,95.03258438122,-65.4644060011202,1,-35.2662807810412,0.0414786970796333,"Kerguelen",1.95875,"M"
"ct109-968-14.ct109-968-14.7713","ct109-968-14",2015-01-25 12:45:01,29.75,95.1464592408246,-65.4136237836508,1,-35.2237391845247,0.0425415965165876,"Kerguelen",1.9525,"M"
"ct109-968-14.ct109-968-14.7714","ct109-968-14",2015-01-25 18:45:01,30,95.0763796494197,-65.4411556570325,1,-35.1801463433522,0.0435928411724129,"Kerguelen",1.874,"M"
"ct109-968-14.ct109-968-14.7715","ct109-968-14",2015-01-26 00:45:01,30.25,94.9513184735057,-65.4309160200767,1,-35.135514221958,0.0446321213942058,"Kerguelen",1.80675,"M"
"ct109-968-14.ct109-968-14.7716","ct109-968-14",2015-01-26 06:45:01,30.5,94.8809081986801,-65.3741049529462,1,-35.0898547717585,0.0456594501995644,"Kerguelen",1.7585,"M"
"ct109-968-14.ct109-968-14.7717","ct109-968-14",2015-01-26 12:45:01,30.75,94.8608441431725,-65.3190454309354,1,-35.0431799290117,0.0466748427467634,"Kerguelen",1.73225,"M"
"ct109-968-14.ct109-968-14.7718","ct109-968-14",2015-01-26 18:45:01,31,94.7752284624773,-65.3374433271133,1,-34.9955016128489,0.0476783161627803,"Kerguelen",1.65225,"M"
"ct109-968-14.ct109-968-14.7719","ct109-968-14",2015-01-27 00:45:01,31.25,94.7984260643124,-65.3903359285729,1,-34.946831786727,0.0486698261219443,"Kerguelen",1.55525,"M"
"ct109-968-14.ct109-968-14.7720","ct109-968-14",2015-01-27 06:45:01,31.5,94.7339549798191,-65.4388335250233,1,-34.8971847408893,0.0496470458376808,"Kerguelen",1.49225,"M"
"ct109-968-14.ct109-968-14.7721","ct109-968-14",2015-01-27 12:45:01,31.75,94.8451444252123,-65.4855553960377,1,-34.8465786654949,0.0506060753944104,"Kerguelen",1.17325,"M"
"ct109-968-14.ct109-968-14.7722","ct109-968-14",2015-01-27 18:45:01,32,95.0619987059832,-65.4490106647701,1,-34.7950322741653,0.0515463913295766,"Kerguelen",1.018,"M"
"ct109-968-14.ct109-968-14.7723","ct109-968-14",2015-01-28 00:45:01,32.25,95.2513429439494,-65.3534847732708,1,-34.7425627060138,0.0524695681514975,"Kerguelen",1.01,"M"
"ct109-968-14.ct109-968-14.7724","ct109-968-14",2015-01-28 06:45:01,32.5,95.3797009675247,-65.2579968814819,1,-34.6891836274298,0.0533790785840593,"Kerguelen",1.01575,"M"
"ct109-968-14.ct109-968-14.7725","ct109-968-14",2015-01-28 12:45:01,32.75,95.3839016097417,-65.1424618463668,1,-34.6349082058896,0.054275421540112,"Kerguelen",1.046,"M"
"ct109-968-14.ct109-968-14.7726","ct109-968-14",2015-01-28 18:45:01,33,95.5773247126482,-65.0666304305441,1,-34.5797495752179,0.0551586306717866,"Kerguelen",1.1355,"M"
"ct109-968-14.ct109-968-14.7727","ct109-968-14",2015-01-29 00:45:01,33.25,95.7237199025393,-64.9978297080895,0,-34.5237208341369,0.056028741080999,"Kerguelen",1.78775,"M"
"ct109-968-14.ct109-968-14.7728","ct109-968-14",2015-01-29 06:45:01,33.5,95.8682991461793,-65.0570598129652,0,-34.4668350448812,0.056885789255634,"Kerguelen",1.95525,"M"
"ct109-968-14.ct109-968-14.7729","ct109-968-14",2015-01-29 12:45:01,33.75,95.8966733922772,-64.9948570257699,0,-34.4091052318828,0.0577298129984138,"Kerguelen",1.9825,"M"
"ct109-968-14.ct109-968-14.7730","ct109-968-14",2015-01-29 18:45:01,34,95.6260471797198,-64.9468850575133,1,-34.3505443805153,0.0585608513674951,"Kerguelen",1.99875,"M"
"ct109-968-14.ct109-968-14.7731","ct109-968-14",2015-01-30 00:45:01,34.25,95.7409454009667,-64.8937237916486,1,-34.2911654359054,0.0593789446099557,"Kerguelen",1.995,"M"
"ct109-968-14.ct109-968-14.7732","ct109-968-14",2015-01-30 06:45:01,34.5,95.9683456914071,-64.915283607942,1,-34.2309813018148,0.0601841340905629,"Kerguelen",1.995,"M"
"ct109-968-14.ct109-968-14.7733","ct109-968-14",2015-01-30 12:45:01,34.75,95.9632385037127,-64.9162443974719,1,-34.1700048395813,0.0609764622335196,"Kerguelen",1.9855,"M"
"ct109-968-14.ct109-968-14.7734","ct109-968-14",2015-01-30 18:45:01,35,95.6094916704772,-64.9083617587136,1,-34.1082488671331,0.0617559724482075,"Kerguelen",1.9785,"M"
"ct109-968-14.ct109-968-14.7735","ct109-968-14",2015-01-31 00:45:01,35.25,95.4623178820201,-65.0144686556314,1,-34.0457261580651,0.0625227090680136,"Kerguelen",2,"M"
"ct109-968-14.ct109-968-14.7736","ct109-968-14",2015-01-31 06:45:01,35.5,95.6135856316237,-64.9812224679957,1,-33.9824494407805,0.0632767172845605,"Kerguelen",1.99925,"M"
"ct109-968-14.ct109-968-14.7737","ct109-968-14",2015-01-31 12:45:01,35.75,95.4944189564012,-65.0060324492989,1,-33.9184313977049,0.0640180430756254,"Kerguelen",1.9915,"M"
"ct109-968-14.ct109-968-14.7738","ct109-968-14",2015-01-31 18:45:01,36,95.4194611824828,-64.975676723646,1,-33.8536846645598,0.0647467331450713,"Kerguelen",1.98525,"M"
"ct109-968-14.ct109-968-14.7739","ct109-968-14",2015-02-01 00:45:01,36.25,95.3227409764775,-64.9969465260936,1,-33.7882218297033,0.0654628348565389,"Kerguelen",1.98275,"M"
"ct109-968-14.ct109-968-14.7740","ct109-968-14",2015-02-01 06:45:01,36.5,95.2460330490372,-64.9811140816636,1,-33.7220554335402,0.0661663961630921,"Kerguelen",1.98175,"M"
"ct109-968-14.ct109-968-14.7741","ct109-968-14",2015-02-01 12:45:01,36.75,95.1698969189765,-65.0038091938776,1,-33.6551979679934,0.0668574655467713,"Kerguelen",1.981,"M"
"ct109-968-14.ct109-968-14.7742","ct109-968-14",2015-02-01 18:45:01,37,95.1410066287351,-65.0693842343671,1,-33.587661876039,0.067536091954451,"Kerguelen",1.98075,"M"
"ct109-968-14.ct109-968-14.7743","ct109-968-14",2015-02-02 00:45:01,37.25,95.1609574909295,-65.0708826698082,1,-33.5194595513114,0.0682023247275398,"Kerguelen",1.97925,"M"
"ct109-968-14.ct109-968-14.7744","ct109-968-14",2015-02-02 06:45:01,37.5,95.1683940257908,-65.1132303277092,1,-33.4506033377649,0.0688562135465087,"Kerguelen",1.97575,"M"
"ct109-968-14.ct109-968-14.7745","ct109-968-14",2015-02-02 12:45:01,37.75,95.0937744654794,-65.105079663347,1,-33.3811055294057,0.0694978083592313,"Kerguelen",1.97425,"M"
"ct109-968-14.ct109-968-14.7746","ct109-968-14",2015-02-02 18:45:01,38,95.0951087829611,-65.1083545655322,1,-33.3109783700815,0.0701271593241959,"Kerguelen",1.96825,"M"
"ct109-968-14.ct109-968-14.7747","ct109-968-14",2015-02-03 00:45:01,38.25,95.0221102140553,-65.0981442429774,1,-33.2402340533333,0.070744316748178,"Kerguelen",1.95625,"M"
"ct109-968-14.ct109-968-14.7748","ct109-968-14",2015-02-03 06:45:01,38.5,94.7155396534904,-65.0270970133432,1,-33.1688847223141,0.0713493310191882,"Kerguelen",1.977,"M"
"ct109-968-14.ct109-968-14.7749","ct109-968-14",2015-02-03 12:45:01,38.75,94.6604397506732,-64.9953434708817,1,-33.0969424697622,0.0719422525519375,"Kerguelen",1.99825,"M"
"ct109-968-14.ct109-968-14.7750","ct109-968-14",2015-02-03 18:45:01,39,94.6627058507375,-65.0434280353577,1,-33.0244193380355,0.0725231317266484,"Kerguelen",1.99875,"M"
"ct109-968-14.ct109-968-14.7751","ct109-968-14",2015-02-04 00:45:01,39.25,94.6141276497415,-65.0646573064582,1,-32.9513273192109,0.0730920188246387,"Kerguelen",1.99875,"M"
"ct109-968-14.ct109-968-14.7752","ct109-968-14",2015-02-04 06:45:01,39.5,94.4333801776115,-64.9996717625503,1,-32.8776783552329,0.0736489639779736,"Kerguelen",1.99825,"M"
"ct109-968-14.ct109-968-14.7753","ct109-968-14",2015-02-04 12:45:01,39.75,94.4677625606644,-64.9816488286996,1,-32.8034843381294,0.0741940171035071,"Kerguelen",1.9955,"M"
"ct109-968-14.ct109-968-14.7754","ct109-968-14",2015-02-04 18:45:01,40,94.4735089297022,-64.9996415497942,1,-32.7287571102786,0.0747272278508071,"Kerguelen",1.9915,"M"
"ct109-968-14.ct109-968-14.7755","ct109-968-14",2015-02-05 00:45:01,40.25,94.6262810068299,-65.0481543854777,1,-32.6535084647316,0.0752486455470103,"Kerguelen",1.9905,"M"
"ct109-968-14.ct109-968-14.7756","ct109-968-14",2015-02-05 06:45:01,40.5,94.6505756236539,-65.0808891862437,1,-32.5777501455961,0.0757583191355105,"Kerguelen",1.98875,"M"
"ct109-968-14.ct109-968-14.7757","ct109-968-14",2015-02-05 12:45:01,40.75,94.6755482488346,-65.1116424984809,1,-32.5014938484693,0.07625629712677,"Kerguelen",1.98625,"M"
"ct109-968-14.ct109-968-14.7758","ct109-968-14",2015-02-05 18:45:01,41,94.7347572302568,-65.1321755605865,1,-32.4247512209241,0.0767426275451788,"Kerguelen",1.987,"M"
"ct109-968-14.ct109-968-14.7759","ct109-968-14",2015-02-06 00:45:01,41.25,94.767583758617,-65.1355394330074,1,-32.3475338630536,0.0772173578705182,"Kerguelen",1.98675,"M"
"ct109-968-14.ct109-968-14.7760","ct109-968-14",2015-02-06 06:45:01,41.5,94.7607669678645,-65.1261119133391,1,-32.26985332264,0.0776805404135716,"Kerguelen",1.98775,"M"
"ct109-968-14.ct109-968-14.7761","ct109-968-14",2015-02-06 12:45:01,41.75,94.7610808495082,-65.1132052000743,1,-32.1917203454434,0.0781329771966544,"Kerguelen",1.98325,"M"
"ct109-968-14.ct109-968-14.7762","ct109-968-14",2015-02-06 18:45:01,42,94.5225462073865,-65.1574005955662,1,-32.1131441077148,0.0785762377285337,"Kerguelen",1.98375,"M"
"ct109-968-14.ct109-968-14.7763","ct109-968-14",2015-02-07 00:45:01,42.25,94.4328723866915,-65.2173951586638,1,-32.0341335592003,0.0790105485145465,"Kerguelen",1.987,"M"
"ct109-968-14.ct109-968-14.7764","ct109-968-14",2015-02-07 06:45:01,42.5,94.5340624198121,-65.3139446483267,1,-31.9546976071394,0.0794359520608967,"Kerguelen",1.9915,"M"
"ct109-968-14.ct109-968-14.7765","ct109-968-14",2015-02-07 12:45:01,42.75,94.5556589312221,-65.3157588506217,1,-31.8748451167841,0.0798524903552922,"Kerguelen",1.99225,"M"
"ct109-968-14.ct109-968-14.7766","ct109-968-14",2015-02-07 18:45:01,43,94.5736209648933,-65.2641416366792,1,-31.7945849119516,0.0802602048325551,"Kerguelen",1.992,"M"
"ct109-968-14.ct109-968-14.7767","ct109-968-14",2015-02-08 00:45:01,43.25,94.6021148000082,-65.2376963937219,1,-31.713925775615,0.0806591363365972,"Kerguelen",1.99475,"M"
"ct109-968-14.ct109-968-14.7768","ct109-968-14",2015-02-08 06:45:01,43.5,94.6083281451918,-65.2853642332407,1,-31.6328764505232,0.0810493250917366,"Kerguelen",1.99475,"M"
"ct109-968-14.ct109-968-14.7769","ct109-968-14",2015-02-08 12:45:01,43.75,94.5665208430449,-65.3036791069626,1,-31.5514456398523,0.0814308106708739,"Kerguelen",1.9965,"M"
"ct109-968-14.ct109-968-14.7770","ct109-968-14",2015-02-08 18:45:01,44,94.5664458716755,-65.2815625175139,1,-31.4696420078944,0.0818036319579163,"Kerguelen",1.996,"M"
"ct109-968-14.ct109-968-14.7771","ct109-968-14",2015-02-09 00:45:01,44.25,94.4877741596341,-65.2512099822472,1,-31.3874741807724,0.0821678271220261,"Kerguelen",1.997,"M"
"ct109-968-14.ct109-968-14.7772","ct109-968-14",2015-02-09 06:45:01,44.5,94.6021352039329,-65.2437002801695,1,-31.3049507514384,0.0825234293339749,"Kerguelen",1.99525,"M"
"ct109-968-14.ct109-968-14.7773","ct109-968-14",2015-02-09 12:45:01,44.75,94.7060702328061,-65.2902786914381,1,-31.2220803264601,0.0828704249783263,"Kerguelen",1.996,"M"
"ct109-968-14.ct109-968-14.7774","ct109-968-14",2015-02-09 18:45:01,45,94.6947430715568,-65.3226223803103,1,-31.1388715093815,0.0832088170785561,"Kerguelen",1.99475,"M"
"ct109-968-14.ct109-968-14.7775","ct109-968-14",2015-02-10 00:45:01,45.25,94.6639102401853,-65.3379219509685,1,-31.0553328693122,0.0835386400693139,"Kerguelen",1.995,"M"
"ct109-968-14.ct109-968-14.7776","ct109-968-14",2015-02-10 06:45:01,45.5,94.6109811528665,-65.3380678758359,1,-30.9714729412399,0.0838599280723329,"Kerguelen",1.997,"M"
"ct109-968-14.ct109-968-14.7777","ct109-968-14",2015-02-10 12:45:01,45.75,94.6933783727606,-65.3537432136608,1,-30.8873002269366,0.0841727143032711,"Kerguelen",1.9975,"M"
"ct109-968-14.ct109-968-14.7778","ct109-968-14",2015-02-10 18:45:01,46,94.7176200101045,-65.3826772197053,1,-30.8028231958991,0.0844770310375054,"Kerguelen",1.99875,"M"
"ct109-968-14.ct109-968-14.7779","ct109-968-14",2015-02-11 00:45:01,46.25,94.5080261167553,-65.3332339454061,1,-30.718050286311,0.08477290958811,"Kerguelen",1.9965,"M"
"ct109-968-14.ct109-968-14.7780","ct109-968-14",2015-02-11 06:45:01,46.5,94.5068176670397,-65.2758135256645,1,-30.6329899060326,0.0850603802784233,"Kerguelen",1.99575,"M"
"ct109-968-14.ct109-968-14.7781","ct109-968-14",2015-02-11 12:45:01,46.75,94.5495729069825,-65.2903383293302,1,-30.5476504336234,0.0853394724091905,"Kerguelen",1.9975,"M"
"ct109-968-14.ct109-968-14.7782","ct109-968-14",2015-02-11 18:45:01,47,94.606960703989,-65.3030132704197,1,-30.4620402193817,0.0856102142417436,"Kerguelen",1.997,"M"
"ct109-968-14.ct109-968-14.7783","ct109-968-14",2015-02-12 00:45:01,47.25,94.7887627065491,-65.34813395572,1,-30.3761675864191,0.0858726329625803,"Kerguelen",2,"M"
"ct109-968-14.ct109-968-14.7784","ct109-968-14",2015-02-12 06:45:01,47.5,94.5665654473076,-65.3388767310665,1,-30.2900408317548,0.0861267546642785,"Kerguelen",1.9995,"M"
"ct109-968-14.ct109-968-14.7785","ct109-968-14",2015-02-12 12:45:01,47.75,94.5810936201886,-65.3390365587354,1,-30.2036682274343,0.0863726043204505,"Kerguelen",1.998,"M"
"ct109-968-14.ct109-968-14.7786","ct109-968-14",2015-02-12 18:45:01,48,94.5194545348527,-65.3118214527,1,-30.1170580216783,0.0866102057560103,"Kerguelen",1.9935,"M"
"ct109-968-14.ct109-968-14.7787","ct109-968-14",2015-02-13 00:45:01,48.25,94.5122913632883,-65.296501523109,1,-30.0302184400501,0.0868395816282508,"Kerguelen",1.99375,"M"
"ct109-968-14.ct109-968-14.7788","ct109-968-14",2015-02-13 06:45:01,48.5,94.2713340060291,-65.3838789028287,1,-29.9431576866468,0.0870607534033341,"Kerguelen",1.99675,"M"
"ct109-968-14.ct109-968-14.7789","ct109-968-14",2015-02-13 12:45:01,48.75,94.1003401636172,-65.3158595706467,1,-29.8558839453189,0.0872737413278479,"Kerguelen",1.998,"M"
"ct109-968-14.ct109-968-14.7790","ct109-968-14",2015-02-13 18:45:01,49,94.17964732282,-65.412397254685,1,-29.7684053809081,0.0874785644108089,"Kerguelen",1.984,"M"
"ct109-968-14.ct109-968-14.7791","ct109-968-14",2015-02-14 00:45:01,49.25,94.3884947990484,-65.4439624704429,1,-29.680730140506,0.0876752404020686,"Kerguelen",1.97175,"M"
"ct109-968-14.ct109-968-14.7792","ct109-968-14",2015-02-14 06:45:01,49.5,94.5812468923781,-65.3357765818876,1,-29.5928663547426,0.0878637857634368,"Kerguelen",1.97475,"M"
"ct109-968-14.ct109-968-14.7793","ct109-968-14",2015-02-14 12:45:01,49.75,94.6976104502356,-65.2884795090028,1,-29.5048221390858,0.0880442156567685,"Kerguelen",1.99025,"M"
"ct109-968-14.ct109-968-14.7794","ct109-968-14",2015-02-14 18:45:01,50,94.7840447878285,-65.3070454256279,1,-29.4166055951725,0.0882165439132832,"Kerguelen",1.9955,"M"
"ct109-968-14.ct109-968-14.7795","ct109-968-14",2015-02-15 00:45:01,50.25,94.701924801496,-65.2850884680013,1,-29.3282248121534,0.0883807830191319,"Kerguelen",1.9955,"M"
"ct109-968-14.ct109-968-14.7796","ct109-968-14",2015-02-15 06:45:01,50.5,94.8017019579852,-65.1885688558198,1,-29.2396878680591,0.0885369440943307,"Kerguelen",1.99675,"M"
"ct109-968-14.ct109-968-14.7797","ct109-968-14",2015-02-15 12:45:01,50.75,94.6427815848695,-65.1344630774412,1,-29.1510028311915,0.088685036867614,"Kerguelen",1.99725,"M"
"ct109-968-14.ct109-968-14.7798","ct109-968-14",2015-02-15 18:45:01,51,94.6014479025818,-65.1141756384247,1,-29.0621777615291,0.088825069662346,"Kerguelen",1.99375,"M"
"ct109-968-14.ct109-968-14.7799","ct109-968-14",2015-02-16 00:45:01,51.25,94.792149964047,-65.1064361344935,1,-28.9732207121524,0.0889570493767367,"Kerguelen",1.988,"M"
"ct109-968-14.ct109-968-14.7800","ct109-968-14",2015-02-16 06:45:01,51.5,94.9454111290867,-65.0744815861296,1,-28.8841397306934,0.0890809814589777,"Kerguelen",1.991,"M"
"ct109-968-14.ct109-968-14.7801","ct109-968-14",2015-02-16 12:45:01,51.75,94.9985075311293,-65.0093260158695,1,-28.794942860796,0.0891968698973566,"Kerguelen",1.996,"M"
"ct109-968-14.ct109-968-14.7802","ct109-968-14",2015-02-16 18:45:01,52,94.9756208234962,-65.0151665108538,1,-28.705638143602,0.0893047171940553,"Kerguelen",1.99625,"M"
"ct109-968-14.ct109-968-14.7803","ct109-968-14",2015-02-17 00:45:01,52.25,95.1520649417423,-65.0219546816232,1,-28.6162336192504,0.0894045243516217,"Kerguelen",1.997,"M"
"ct109-968-14.ct109-968-14.7804","ct109-968-14",2015-02-17 06:45:01,52.5,95.2173207420175,-65.0671964804931,1,-28.5267373283939,0.0894962908564556,"Kerguelen",1.99775,"M"
"ct109-968-14.ct109-968-14.7805","ct109-968-14",2015-02-17 12:45:01,52.75,95.1726864974724,-65.0926337090487,1,-28.4371573137373,0.0895800146566317,"Kerguelen",1.9975,"M"
"ct109-968-14.ct109-968-14.7806","ct109-968-14",2015-02-17 18:45:01,53,95.2271669511862,-65.0527240184096,1,-28.3475016215884,0.0896556921488989,"Kerguelen",1.9985,"M"
"ct109-968-14.ct109-968-14.7807","ct109-968-14",2015-02-18 00:45:01,53.25,95.056831713151,-65.0363063680615,1,-28.2577783034243,0.0897233181640533,"Kerguelen",1.99925,"M"
"ct109-968-14.ct109-968-14.7808","ct109-968-14",2015-02-18 06:45:01,53.5,95.0986179461118,-65.0681405718839,1,-28.1679954173411,0.0897828860832339,"Kerguelen",1.99925,"M"
"ct109-968-14.ct109-968-14.7809","ct109-968-14",2015-02-18 12:45:01,53.75,95.1402081122364,-65.0913352306466,1,-28.078160767788,0.0898346495530777,"Kerguelen",1.99725,"M"
"ct109-968-14.ct109-968-14.7810","ct109-968-14",2015-02-18 18:45:01,54,95.2193993428756,-65.0486443424554,1,-27.988281361691,0.089879406097032,"Kerguelen",1.9985,"M"
"ct109-968-14.ct109-968-14.7811","ct109-968-14",2015-02-19 00:45:01,54.25,95.2360417055303,-65.0739144614211,1,-27.8983640600654,0.0899173016255694,"Kerguelen",1.9985,"M"
"ct109-968-14.ct109-968-14.7812","ct109-968-14",2015-02-19 06:45:01,54.5,95.4086289289579,-65.1213503129191,1,-27.8084157338651,0.0899483262003287,"Kerguelen",1.99975,"M"
"ct109-968-14.ct109-968-14.7813","ct109-968-14",2015-02-19 12:45:01,54.75,95.2972553662349,-65.095593974456,1,-27.7184432653967,0.0899724684683578,"Kerguelen",1.998,"M"
[truncated: 4,114,831 more chars]
